# Supplementary material for: Stereoselective hydrodefluorination of CF3-substituted alkenes and gem-difluoroalkenes by H−
Source: Royal Society of Chemistry journal article supplement (doi:10.1039/d3qo01900d), 2024-01-01
Supplement: d3qo01900d1.pdf [file d3qo01900d1.pdf]

## *Supplementary Information*

### **Stereoselective Hydrodefluorination of CF<sub>3</sub>-substituted alkenes and *gem*-Difluoroalkenes by H<sup>-</sup>**

Dachang Bai,\*<sup>1,2</sup> Xin Li,<sup>1</sup> Fen Wu,<sup>1</sup> Junbiao Chang<sup>1\*</sup>

<sup>1</sup> NMPA Key Laboratory for Research and Evaluation of Innovative Drug, Key Laboratory of Green Chemical Media and Reactions, Ministry of Education, School of Chemistry and Chemical Engineering, Henan Normal University, Pingyuan Laboratory, Xinxiang 453007, China

<sup>2</sup> State Key Laboratory of Organometallic Chemistry, Shanghai Institute of Organic Chemistry, Chinese Academy of Sciences, Shanghai 200032, P R China

E-mail: [baidachang@htu.edu.cn](mailto:baidachang@htu.edu.cn); [changjunbiao@zzu.edu.cn](mailto:changjunbiao@zzu.edu.cn)

## Table of Contents

|                                                            |          |
|------------------------------------------------------------|----------|
| 1. General Information .....                               | S3       |
| 2. General Synthetic Procedures and Characterization.....  | S3-S23   |
| 3. Gram-Scale Synthesis and Derivatization Reactions ..... | S24-S34  |
| 4. Mechanism Studies .....                                 | S35-S40  |
| 5 Supplementary References .....                           | S41      |
| 6 NMR Spectra and HRMS Report .....                        | S42-S221 |

## 1, General Information

All chemicals were obtained from commercial sources and were used as received unless otherwise noted. All the reactions were carried out under argon atmosphere in a argon-filled glove box. The  $^1\text{H}$  NMR spectra were recorded on a 400 MHz or 600 MHz NMR spectrometer. The  $^{13}\text{C}$  NMR spectra were recorded at 101 MHz or 151 MHz. The  $^{19}\text{F}$  NMR spectra were recorded at 376 MHz or 565 MHz. Chemical shifts were expressed in parts per million ( $\delta$ ) downfield from the internal standard tetramethylsilane, and were reported as s (singlet), d (doublet), t (triplet), dd (doublet of doublet), dt (doublet of triplet), m (multiplet), brs (broad single), etc. The residual solvent signals were used as references and the chemical shifts were converted to the TMS scale. High resolution mass spectra were obtained on an Agilent Q-TOF 6540 spectrometer. Column chromatography was performed on silica gel (300-400 mesh). Thin layer chromatography was performed on pre-coated glass back plates and visualized with UV light at 254 nm. Flash column chromatography was performed on silica gel *gem*-difluoroalkenes<sup>1,2</sup> and trifluoromethyl alkenes<sup>3,4</sup> were prepared according to literature reports.

## 2. General Synthetic Procedures and Characterization

**General procedure A:**  $\text{Zn}(\text{OAc})_2$  (3.7 mg, 0.02 mmol) and Xantphos (11.6 mg, 0.02 mmol) in DMSO (2.0 mL) were charged into a 25 mL pressure tube under argon. The mixture was stirred for 30 min at room temperature. Then  $\text{Ph}_2\text{SiH}_2$  (110.6 mg, 0.6 mmol) and trifluoromethyl alkene **1** (0.2 mmol, 1.0 equiv) were added sequentially to the reaction mixture. The reaction tube was then sealed and placed into an oil bath at 120 °C. After stirred for 24 h, the reaction mixture was quenched with  $\text{H}_2\text{O}$  (2.0 mL) and extracted with dichloromethane. The organic layer was separated, dried over  $\text{Na}_2\text{SO}_4$ , concentrated, and purified by silica gel chromatography to give the monofluoride product **3a – 3p**.

**General procedure B:**  $\text{Zn}(\text{OAc})_2$  (3.7 mg, 0.02 mmol) and  $\text{PPh}_3$  (5.3 mg, 0.02 mmol) in DMSO (2.0 mL) were charged into a 25 mL pressure tube under argon. The mixture was stirred for 30 min at room temperature. Then  $\text{Ph}_2\text{SiH}_2$  (36.8 mg, 0.2 mmol) and *gem*-difluoroalkene **4** (0.2 mmol, 1.0 equiv) were added sequentially to the reaction mixture. The reaction tube was then sealed and placed into an oil bath at 50 °C. After stirred for 24 h, the reaction mixture was quenched with  $\text{H}_2\text{O}$  (2.0 mL) and extracted with dichloromethane. The organic layer was separated, dried over  $\text{Na}_2\text{SO}_4$ ,

concentrated, and purified by silica gel chromatography to give the monofluoride product **3a**, **3m** and **5a – 5z**.

**General procedure C:** Zn(OAc)<sub>2</sub> (3.7 mg, 0.02 mmol) and PPh<sub>3</sub> (5.3 mg, 0.02 mmol) in DMSO (2.0 mL) were charged into a 25 mL pressure tube under argon. The mixture was stirred for 30 min at room temperature. Then Ph<sub>2</sub>SiH<sub>2</sub> (36.8 mg, 0.2 mmol) and perfluoroaromatic product **6** (0.2 mmol, 1.0 equiv) were added sequentially to the reaction mixture. The reaction tube was then sealed and placed into an oil bath at 50 °C. After stirred for 24 h, the reaction mixture was quenched with H<sub>2</sub>O and extracted with dichloromethane. The organic layer was separated, dried over Na<sub>2</sub>SO<sub>4</sub>, concentrated, and purified by silica gel chromatography to give the product **7a**, **7b**.



## 2.1 Supplementary Table S1, Optimization of reaction conditions of **1a**.<sup>[a]</sup>

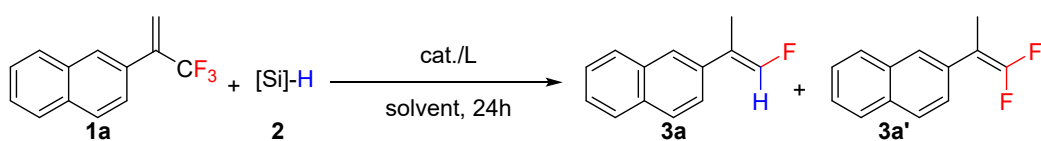

| Entry           | solvent | [Si]-H                           | cat.                                            | L (mol %)         | T (°C) | <b>3a</b> yield (%) | <b>3a'</b> yield (%) | <b>3a</b> <i>E/Z</i> |
|-----------------|---------|----------------------------------|-------------------------------------------------|-------------------|--------|---------------------|----------------------|----------------------|
| 1               | DMSO    | Ph <sub>2</sub> SiH <sub>2</sub> | Zn(OAc) <sub>2</sub>                            | PPh <sub>3</sub>  | 50     | 21                  | 52                   | 85/15                |
| 2 <sup>b</sup>  | DMSO    | Ph <sub>2</sub> SiH <sub>2</sub> | Zn(OAc) <sub>2</sub>                            | PPh <sub>3</sub>  | 100    | 45                  | 31                   | 85/15                |
| 3               | DMSO    | Ph <sub>2</sub> SiH <sub>2</sub> | Zn(OAc) <sub>2</sub>                            | PPh <sub>3</sub>  | 100    | 63                  | 11                   | 85/15                |
| 4 <sup>c</sup>  | DMSO    | Ph <sub>2</sub> SiH <sub>2</sub> | Zn(OAc) <sub>2</sub>                            | PPh <sub>3</sub>  | 100    | 63                  | 11                   | 85/15                |
| 5               | DMSO    | Ph <sub>2</sub> SiH <sub>2</sub> | Zn(OAc) <sub>2</sub>                            | PPh <sub>3</sub>  | 120    | 66                  | 9                    | 85/15                |
| 6               | DMSO    | Ph <sub>2</sub> SiH <sub>2</sub> | Zn(OAc) <sub>2</sub>                            | Xantphos          | 120    | 87                  | trace                | 85/15                |
| 7               | DMSO    | Ph <sub>2</sub> SiH <sub>2</sub> | Zn(OAc) <sub>2</sub>                            | <i>rac</i> -BINAP | 120    | 66                  | 11                   | 85/15                |
| 8               | DMSO    | Ph <sub>2</sub> SiH <sub>2</sub> | Zn(OAc) <sub>2</sub>                            | Bpy               | 120    | 77                  | trace                | 84/16                |
| 9 <sup>e</sup>  | DMSO    | Ph <sub>2</sub> SiH <sub>2</sub> | Zn(OAc) <sub>2</sub>                            | <b>L1</b>         | 120    | 69                  | trace                | 83/17                |
| 10              | DMSO    | Ph <sub>2</sub> SiH <sub>2</sub> | Zn(OAc) <sub>2</sub>                            | --                | 120    | 63                  | 11                   | 85/15                |
| 11              | DMSO    | Ph <sub>2</sub> SiH <sub>2</sub> | --                                              | Xantphos          | 120    | --                  | --                   | --                   |
| 12              | DMSO    | Ph <sub>2</sub> SiH <sub>2</sub> | --                                              | --                | 120    | --                  | --                   | --                   |
| 13              | DMSO    | Ph <sub>2</sub> SiH <sub>2</sub> | CsOAc                                           | Xantphos          | 120    | 49                  | 19                   | 73/27                |
| 14              | DMSO    | Ph <sub>2</sub> SiH <sub>2</sub> | NaOAc                                           | Xantphos          | 120    | 67                  | 6                    | 74/26                |
| 15              | DMSO    | Ph <sub>2</sub> SiH <sub>2</sub> | ZnCl <sub>2</sub>                               | Xantphos          | 120    | --                  | 38                   | --                   |
| 16              | DMSO    | Ph <sub>2</sub> SiH <sub>2</sub> | ZnBr <sub>2</sub>                               | Xantphos          | 120    | --                  | 25                   | --                   |
| 17              | DMSO    | Ph <sub>2</sub> SiH <sub>2</sub> | Zn(acac) <sub>2</sub>                           | Xantphos          | 120    | 76                  | --                   | 81/19                |
| 18              | DMSO    | Ph <sub>2</sub> SiH <sub>2</sub> | Zn <sub>3</sub> (PO <sub>4</sub> ) <sub>2</sub> | Xantphos          | 120    | --                  | 11                   | --                   |
| 19              | DMSO    | Ph <sub>2</sub> SiH <sub>2</sub> | CsF                                             | Xantphos          | 120    | 78                  | --                   | 75/25                |
| 20              | DMSO    | Ph <sub>2</sub> SiH <sub>2</sub> | KF                                              | Xantphos          | 120    | 10                  | 60                   | --                   |
| 21              | DMSO    | Ph <sub>2</sub> SiH <sub>2</sub> | BPh <sub>3</sub>                                | Xantphos          | 120    | --                  | --                   | --                   |
| 22              | DMF     | Ph <sub>2</sub> SiH <sub>2</sub> | Zn(OAc) <sub>2</sub>                            | Xantphos          | 120    | --                  | trace                | --                   |
| 23              | THF     | Ph <sub>2</sub> SiH <sub>2</sub> | Zn(OAc) <sub>2</sub>                            | Xantphos          | 120    | trace               | 56                   | --                   |
| 24              | toluene | Ph <sub>2</sub> SiH <sub>2</sub> | Zn(OAc) <sub>2</sub>                            | Xantphos          | 120    | trace               | 61                   | --                   |
| 25              | DCE     | Ph <sub>2</sub> SiH <sub>2</sub> | Zn(OAc) <sub>2</sub>                            | Xantphos          | 120    | trace               | 53                   | --                   |
| 26              | DMSO    | (MeO) <sub>2</sub> SiHMe         | Zn(OAc) <sub>2</sub>                            | Xantphos          | 120    | 12                  | 41                   | 80/20                |
| 27              | DMSO    | PhSiH <sub>3</sub>               | Zn(OAc) <sub>2</sub>                            | Xantphos          | 120    | 38                  | 29                   | 84/16                |
| 28 <sup>d</sup> | DMSO    | PhSiH <sub>3</sub>               | Zn(OAc) <sub>2</sub>                            | Xantphos          | 120    | 17                  | 45                   | 84/16                |

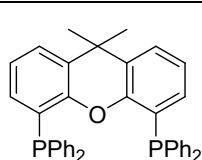

Xantphos

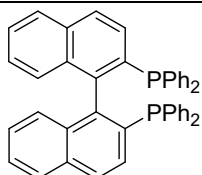

*rac*-BINAP

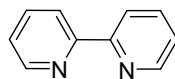

Bpy

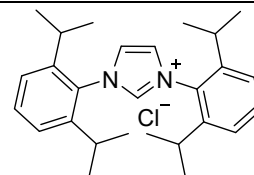

**L1**

<sup>a</sup>Reaction conditions: **1a** (0.20 mmol), **2** (0.60 mmol), cat. (10 mmol%), **L** (10 mmol%), solvent (2.0 mL), 24 h under argon, yield and *E/Z* ratio determined by <sup>19</sup>F NMR with trifluoromethylbenzene (0.1 mmol) as internal standard. <sup>b</sup> **2a** (0.40 mmol). <sup>c</sup> **2a** (0.80 mmol). <sup>d</sup> PhSiH<sub>3</sub> (0.20 mmol). <sup>e</sup> CsOAc (0.02 mmol) was added.

## 2.2 Supplementary Table S2, Optimization of reaction conditions of **4a**.<sup>[a]</sup>

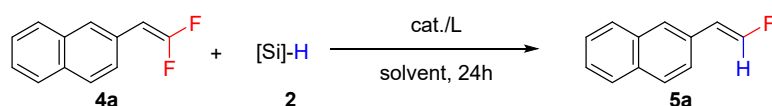

| Entry           | solvent     | [Si]-H                           | cat.                            | L(mol %)          | T(°C) | <b>5a</b> yield(%) | <b>5a</b> E/Z |
|-----------------|-------------|----------------------------------|---------------------------------|-------------------|-------|--------------------|---------------|
| 1               | DMSO        | Ph <sub>2</sub> SiH <sub>2</sub> | --                              | --                | 30    | --                 | --            |
| 2               | DMSO        | Ph <sub>2</sub> SiH <sub>2</sub> | Zn(OAc) <sub>2</sub>            | --                | 30    | 45                 | 93/7          |
| 3               | DMSO        | Ph <sub>2</sub> SiH <sub>2</sub> | Zn(OAc) <sub>2</sub>            | PPh <sub>3</sub>  | 30    | 62                 | 96/4          |
| 4               | DMSO        | Ph <sub>2</sub> SiH <sub>2</sub> | Zn(OAc) <sub>2</sub>            | Xantphos          | 30    | 57                 | 94/6          |
| 5               | DMSO        | Ph <sub>2</sub> SiH <sub>2</sub> | Zn(OAc) <sub>2</sub>            | <i>rac</i> -BINAP | 30    | 60                 | 96/4          |
| 6               | DMSO        | Ph <sub>2</sub> SiH <sub>2</sub> | Zn(OAc) <sub>2</sub>            | Bpy               | 30    | 39                 | 95/5          |
| 7               | DMSO        | Ph <sub>2</sub> SiH <sub>2</sub> | Zn(OAc) <sub>2</sub>            | 1,10-phen         | 30    | 42                 | 93/7          |
| 8               | THF         | Ph <sub>2</sub> SiH <sub>2</sub> | Zn(OAc) <sub>2</sub>            | PPh <sub>3</sub>  | 30    | --                 | --            |
| 9               | toluene     | Ph <sub>2</sub> SiH <sub>2</sub> | Zn(OAc) <sub>2</sub>            | PPh <sub>3</sub>  | 30    | --                 | --            |
| 10              | tBuOMe      | Ph <sub>2</sub> SiH <sub>2</sub> | Zn(OAc) <sub>2</sub>            | PPh <sub>3</sub>  | 30    | --                 | --            |
| 11              | 1,4-Dioxane | Ph <sub>2</sub> SiH <sub>2</sub> | Zn(OAc) <sub>2</sub>            | PPh <sub>3</sub>  | 30    | --                 | --            |
| 12              | DME         | Ph <sub>2</sub> SiH <sub>2</sub> | Zn(OAc) <sub>2</sub>            | PPh <sub>3</sub>  | 30    | --                 | --            |
| 13              | MeOH        | Ph <sub>2</sub> SiH <sub>2</sub> | Zn(OAc) <sub>2</sub>            | PPh <sub>3</sub>  | 30    | --                 | --            |
| 14              | DCE         | Ph <sub>2</sub> SiH <sub>2</sub> | Zn(OAc) <sub>2</sub>            | PPh <sub>3</sub>  | 30    | --                 | --            |
| 15              | DMA         | Ph <sub>2</sub> SiH <sub>2</sub> | Zn(OAc) <sub>2</sub>            | PPh <sub>3</sub>  | 30    | --                 | --            |
| 16              | DMSO        | Ph <sub>2</sub> SiH <sub>2</sub> | Zn(OAc) <sub>2</sub>            | PPh <sub>3</sub>  | 50    | 81                 | 95/5          |
| 17 <sup>b</sup> | DMSO        | Ph <sub>2</sub> SiH <sub>2</sub> | Zn(OAc) <sub>2</sub>            | PPh <sub>3</sub>  | 50    | 84                 | 95/5          |
| 18 <sup>b</sup> | DMSO        | PhSiH <sub>3</sub>               | Zn(OAc) <sub>2</sub>            | PPh <sub>3</sub>  | 50    | 53                 | 95/5          |
| 19 <sup>b</sup> | DMSO        | (MeO) <sub>3</sub> SiH           | Zn(OAc) <sub>2</sub>            | PPh <sub>3</sub>  | 50    | 23                 | 94/6          |
| 20 <sup>c</sup> | DMSO        | Ph <sub>2</sub> SiH <sub>2</sub> | Zn(OAc) <sub>2</sub>            | PPh <sub>3</sub>  | 50    | 63                 | 94/6          |
| 21 <sup>d</sup> | DMSO        | Ph <sub>2</sub> SiH <sub>2</sub> | Zn(OAc) <sub>2</sub>            | PPh <sub>3</sub>  | 50    | --                 | --            |
| 22 <sup>b</sup> | DMSO        | Ph <sub>2</sub> SiH <sub>2</sub> | ZnCl <sub>2</sub>               | PPh <sub>3</sub>  | 50    | --                 | --            |
| 23 <sup>b</sup> | DMSO        | Ph <sub>2</sub> SiH <sub>2</sub> | ZnBr <sub>2</sub>               | PPh <sub>3</sub>  | 50    | --                 | --            |
| 24 <sup>b</sup> | DMSO        | Ph <sub>2</sub> SiH <sub>2</sub> | BPh <sub>3</sub>                | PPh <sub>3</sub>  | 50    | --                 | --            |
| 25 <sup>b</sup> | DMSO        | Ph <sub>2</sub> SiH <sub>2</sub> | Cu(OAc) <sub>2</sub>            | PPh <sub>3</sub>  | 30    | 9                  | 68/32         |
| 26 <sup>b</sup> | DMSO        | Ph <sub>2</sub> SiH <sub>2</sub> | NaOAc                           | PPh <sub>3</sub>  | 30    | 17                 | 90/10         |
| 27 <sup>b</sup> | DMSO        | Ph <sub>2</sub> SiH <sub>2</sub> | <sup>t</sup> BuOK               | PPh <sub>3</sub>  | 30    | 23                 | 89/11         |
| 28 <sup>b</sup> | DMSO        | Ph <sub>2</sub> SiH <sub>2</sub> | Na <sub>2</sub> CO <sub>3</sub> | PPh <sub>3</sub>  | 30    | 12                 | 90/10         |

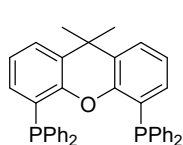

Xantphos

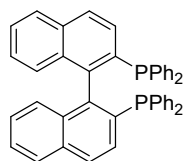

*rac*-BINAP

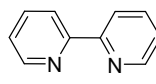

Bpy

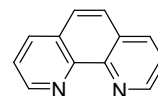

1,10-phen

<sup>a</sup>Reaction conditions: **4a** (0.20 mmol), **2** (0.40 mmol), cat. (10 mmol%), **L** (10 mmol%), solvent (2.0 mL), 24 h under argon, NMR yield with trifluoromethylbenzene (0.1 mmol) as internal standard, *E/Z* ratio determined by <sup>1</sup>H NMR. <sup>b</sup> [Si]-H (0.20 mmol). <sup>c</sup> **2a** (0.20 mmol), Zn(OAc)<sub>2</sub> (5 mmol%). <sup>d</sup> In the air.

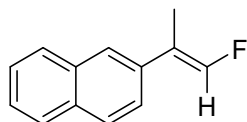

**3a<sup>5</sup>**, General procedure A, (from trifluoromethyl alkene), purified by silica gel chromatography (PE). Colorless oil, 32.4 mg (87% yield, *E/Z* = 85/15); <sup>1</sup>H NMR (400 MHz, CDCl<sub>3</sub>) δ (*E* isomer) 7.85 – 7.79 (m, 3H), 7.74 (s, 1H), 7.49 – 7.44 (m, 3H), 7.06 (dq, *J* = 84.8, 1.6 Hz, 1H), 2.16 (dd, *J* = 3.8, 1.6 Hz, 3H). HRMS (ESI, *m/z*): calcd for C<sub>13</sub>H<sub>12</sub>F<sup>+</sup> [*M* + H]<sup>+</sup>: 187.0918, found 187.0946.

**3a** General procedure B, (from *gem*-difluoroalkene), Ph<sub>2</sub>SiH<sub>2</sub> (73.7 mg, 0.40 mmol), 100 °C, purified by silica gel chromatography (PE). Colorless oil, 24.2 mg (65% yield, *E/Z* = 89/11); <sup>1</sup>H NMR (400 MHz, CDCl<sub>3</sub>) δ (*E* isomer) 7.84 – 7.80 (m, 3H), 7.75 (s, 1H), 7.50 – 7.44 (m, 3H), 7.07 (dq, *J* = 84.8, 1.6 Hz, 1H), 2.16 (dd, *J* = 3.8, 1.6 Hz, 3H). <sup>13</sup>C NMR (101 MHz, CDCl<sub>3</sub>) δ (*E* isomer) 146.6 (d, *J* = 258.0 Hz), 135.0 (d, *J* = 8.7 Hz), 133.6, 132.8, 128.3, 128.1, 127.7, 126.5, 126.0, 124.7 (d, *J* = 4.4 Hz), 124.1 (d, *J* = 2.4 Hz), 12.3 (d, *J* = 6.4 Hz). <sup>19</sup>F NMR (376 MHz, CDCl<sub>3</sub>) (mixture of isomers) δ (*Z* isomer) -128.33 (dq, *J* = 84.6, 5.2 Hz); (*E* isomer) -130.34 (dq, *J* = 84.8, 3.6 Hz). HRMS (ESI, *m/z*): calcd for C<sub>13</sub>H<sub>12</sub>F<sup>+</sup> [*M* + H]<sup>+</sup>: 187.0918, found 187.0891.

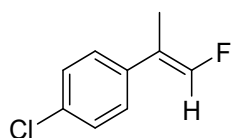

**3b**, General procedure A, purified by silica gel chromatography (PE). Colorless oil, NMR yield 84%, *E/Z* = 86/14; <sup>1</sup>H NMR (400 MHz, CDCl<sub>3</sub>) (mixture of isomers) δ (*E* isomer) 7.31 – 7.29 (m, 2H), 7.26 – 7.22 (m, 2H), 6.88 (dq, *J* = 84.6, 1.6 Hz, 1H), 2.02 (dd, *J* = 3.8, 1.6 Hz, 3H); (*Z* isomer) 6.66 (dq, *J* = 84.4, 1.6 Hz, 1H), 1.89 (dd, *J* = 5.0, 1.6 Hz, 3H). <sup>13</sup>C NMR (101 MHz, CDCl<sub>3</sub>) (mixture of isomers) δ 146.3 (d, *J* = 258.8 Hz), 136.2 (d, *J* = 9.4 Hz), 133.4, 128.9, 127.3 (d, *J* = 3.0 Hz), 119.4 (d, *J* = 10.2 Hz), 12.3 (d, *J* = 5.8 Hz). <sup>19</sup>F NMR (376 MHz, CDCl<sub>3</sub>) (mixture of isomer) δ (*Z* minor) -127.75 (dq, *J* = 84.4, 5.0 Hz); (*E* major) -129.92 – -130.17 (m). HRMS (ESI, *m/z*): calcd for C<sub>9</sub>H<sub>8</sub>ClF<sup>+</sup> [*M* + K]<sup>+</sup>: 208.9930, found 208.9919.

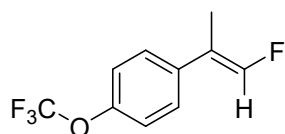

**3c**, General procedure A, purified by silica gel chromatography (PE). Colorless oil, NMR yield 62%, *E/Z* = 84/16; <sup>1</sup>H NMR (400 MHz, CDCl<sub>3</sub>) (mixture of isomers) δ (*E* isomer) 7.33 – 7.30 (m, 2H),

7.19 – 7.17 (m, 2H), 6.88 (dq,  $J = 84.4, 1.6$  Hz, 1H), 2.03 (dd,  $J = 3.8, 1.6$  Hz, 3H); (*Z* isomer) 1.91 (dd,  $J = 4.8, 1.6$  Hz, 3H).  $^{13}\text{C}$  NMR (101 MHz,  $\text{CD}_2\text{Cl}_2$ ) (mixture of isomers)  $\delta$  148.9, 146.8 (d,  $J = 258.1$  Hz), 136.9 (d,  $J = 9.0$  Hz), 127.7 (d,  $J = 3.5$  Hz), 121.5, 121.0 (q,  $J = 256.5$  Hz), 119.6 (d,  $J = 10.2$  Hz), 12.4 (d,  $J = 6.3$  Hz).  $^{19}\text{F}$  NMR (376 MHz,  $\text{CDCl}_3$ )  $\delta$  (*Z* isomer) -57.83 (s, 3F), -128.03 (dq,  $J = 84.8, 4.8$  Hz, 1F) (*E* isomer) -57.92 (s, 3F), -129.52 – -129.77 (m, 1F). HRMS (ESI,  $m/z$ ): calcd for  $\text{C}_{10}\text{H}_7\text{OF}_4^+ [\text{M} + \text{H}]^+$ : 219.0428, found 219.0459.

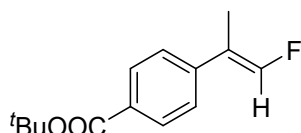

**3d**, General procedure A, purified by silica gel chromatography (PE : EA = 15:1). Colorless oil, 46.7 mg (99% yield, *E/Z* = 84/16);  $^1\text{H}$  NMR (400 MHz,  $\text{CDCl}_3$ ) (mixture of isomers)  $\delta$  (*E* isomer) 7.96 – 7.93 (m, 2H), 7.36 – 7.32 (m, 2H), 6.97 (dq,  $J = 84.4, 1.6$  Hz, 1H), 2.05 (dd,  $J = 3.8, 1.6$  Hz, 3H), 1.59 (s, 9H); (*Z* isomer) 6.69 (dq,  $J = 84.0, 1.6$  Hz, 1H), 1.92 (dd,  $J = 4.8, 1.6$  Hz, 3H).  $^{13}\text{C}$  NMR (101 MHz,  $\text{CDCl}_3$ ) (mixture of isomers)  $\delta$  165.6, 147.1 (d,  $J = 260.6$  Hz), 141.8 (d,  $J = 8.9$  Hz), 129.8, 129.4, 125.6 (d,  $J = 3.4$  Hz), 119.8 (d,  $J = 10.2$  Hz), 81.2, 28.3, 12.1 (d,  $J = 5.9$  Hz).  $^{19}\text{F}$  NMR (376 MHz,  $\text{CDCl}_3$ ) (mixture of isomers)  $\delta$  (*Z* isomer) -126.30 (dq,  $J = 84.0, 4.8$  Hz); (*E* isomer) -128.45 (dq,  $J = 84.4, 3.8$  Hz). HRMS (ESI,  $m/z$ ): calcd for  $\text{C}_{14}\text{H}_{17}\text{FNaO}_2^+ [\text{M} + \text{Na}]^+$ : 259.1105, found 259.1106.

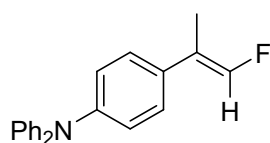

**3e**, General procedure A, purified by silica gel chromatography (PE : Acetone = 30:1). Colorless oil, 21.8 mg (36% yield, *E/Z* = 85/15);  $^1\text{H}$  NMR (400 MHz,  $\text{CDCl}_3$ )  $\delta$  (*E* isomer) 7.28 – 7.23 (m, 4H), 7.19 – 7.15 (m, 2H), 7.11 – 7.08 (m, 4H), 7.01 – 6.79 (m, 5H), 2.02 (dd,  $J = 3.8, 1.6$  Hz, 3H).  $^{13}\text{C}$  NMR (101 MHz,  $\text{CDCl}_3$ )  $\delta$  (*E* isomer) 147.8, 147.3, 145.7 (d,  $J = 257.1$  Hz), 131.6 (d,  $J = 9.0$  Hz), 129.4, 126.7 (d,  $J = 3.5$  Hz), 124.5, 123.9, 123.1, 119.7 (d,  $J = 10.2$  Hz), 12.3 (d,  $J = 5.9$  Hz).  $^{19}\text{F}$  NMR (376 MHz,  $\text{CDCl}_3$ ) (mixture of isomers)  $\delta$  (*Z* isomer) -129.02 – -129.25 (m); (*E* isomer) -132.60 (dq,  $J = 84.8, 3.8$  Hz). HRMS (ESI,  $m/z$ ): calcd for  $\text{C}_{21}\text{H}_{18}\text{FKN}^+ [\text{M} + \text{K}]^+$ : 342.1055, found 342.1036.

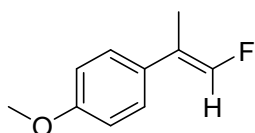

**3f<sup>5</sup>**, General procedure A, after adding Zn(OAc)<sub>2</sub> (7.3mg, 0.04 mmol) and Xantphos (23.1mg, 0.04 mmol), add NaOAc (16.4 mg, 0.2 mmol) and use PhSiH<sub>3</sub> as silane, 130°C, purified by silica gel chromatography (PE : DCM = 8:1). Colorless oil, NMR yield 56%, *E/Z* = 83/17; <sup>1</sup>H NMR (400 MHz, CDCl<sub>3</sub>) δ (*E* isomer) 7.25 – 7.21 (m, 2H), 6.89 – 6.85 (m, 2H), 6.85 (dq, *J* = 86.0, 1.6 Hz, 1H), 3.81 (s, 3H), 2.01 (dd, *J* = 3.8, 1.6 Hz, 3H). <sup>13</sup>C NMR (101 MHz, CDCl<sub>3</sub>) δ (*E* isomer) 159.2, 145.3 (d, *J* = 256.4 Hz), 130.1 (d, *J* = 8.7 Hz), 127.1 (d, *J* = 3.0 Hz), 119.6 (d, *J* = 9.6 Hz), 114.1, 55.4, 12.5 (d, *J* = 5.8 Hz). <sup>19</sup>F NMR (376 MHz, CDCl<sub>3</sub>) (mixture of isomers) δ (*Z* isomer) -130.31 (dq, *J* = 84.6, 4.8 Hz); (*E* isomer) -133.01 (dq, *J* = 86.0, 3.8 Hz). HRMS (ESI, *m/z*): calcd for C<sub>10</sub>H<sub>12</sub>FO<sup>+</sup> [*M* + *H*]<sup>+</sup>: 167.0867, found 167.0876.

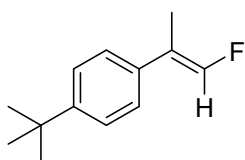

**3g<sup>5</sup>**, General procedure A, after adding Zn(OAc)<sub>2</sub> (7.3mg, 0.04 mmol) and Xantphos (23.1mg, 0.04 mmol), add NaOAc (16.4 mg, 0.2 mmol) and use PhSiH<sub>3</sub> as silane, 130°C, purified by silica gel chromatography (PE). Colorless oil, NMR yield 51%, *E/Z* = 77/23; <sup>1</sup>H NMR (400 MHz, CDCl<sub>3</sub>) δ (*E* isomer) 7.38 – 7.34 (m, 2H), 7.26 – 7.23 (m, 2H), 6.90 (dq, *J* = 86.0, 1.6 Hz, 1H), 2.03 (dd, *J* = 3.8, 1.6 Hz, 3H), 1.32 (s, 9H). <sup>13</sup>C NMR (101 MHz, CDCl<sub>3</sub>) δ (*E* isomer) 150.6, 145.9 (d, *J* = 257.2 Hz), 134.7 (d, *J* = 8.8 Hz), 125.7 (d, *J* = 3.5 Hz), 125.6, 119.9 (d, *J* = 9.9 Hz), 34.6, 31.4, 12.3 (d, *J* = 6.0 Hz). <sup>19</sup>F NMR (376 MHz, CDCl<sub>3</sub>) δ (*E* isomer) -132.15 (dq, *J* = 86.0, 3.8 Hz). HRMS (ESI, *m/z*): calcd for C<sub>13</sub>H<sub>17</sub>FK<sup>+</sup> [*M* + *K*]<sup>+</sup>: 231.0946, found 231.0951.

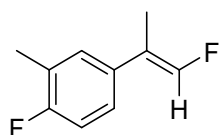

**3h**, General procedure A, purified by silica gel chromatography (PE). Colorless oil, NMR yield 77%, *E/Z* = 83/17; <sup>1</sup>H NMR (400 MHz, CD<sub>2</sub>Cl<sub>2</sub>) δ (*E* isomer) 7.18 – 7.13 (m, 1H), 7.02 – 7.00 (m, 1H), 6.97 (dd, *J* = 11.2, 1.8 Hz, 1H), 6.94 (dq, *J* = 84.8, 1.6 Hz, 1H), 2.25 (d, *J* = 2.0 Hz, 3H), 2.00 (dd, *J* = 3.8, 1.6 Hz, 3H). <sup>13</sup>C NMR (101 MHz, CD<sub>2</sub>Cl<sub>2</sub>) δ (*E* isomer) 161.8 (d, *J* = 243.8 Hz), 146.6 (d, *J* = 257.8 Hz), 137.5 (dd, *J* = 9.3, 8.0 Hz), 131.9 (d, *J* = 5.8 Hz), 124.3 (d, *J* = 17.4 Hz), 121.5 (dd, *J* =

3.6, 2.8 Hz), 119.7 (dd,  $J = 10.8, 2.1$  Hz), 112.6 (dd,  $J = 23.3, 3.5$  Hz), 14.3 (d,  $J = 3.6$  Hz), 12.2 (d,  $J = 6.1$  Hz).  $^{19}\text{F}$  NMR (376 MHz,  $\text{CD}_2\text{Cl}_2$ ) (mixture of isomers)  $\delta$  (*Z* isomer) -128.32 (dq,  $J = 84.6, 5.0$  Hz, 1F); (*E* isomer) -118.19 – -118.26 (m, 1F), -131.73 (dq,  $J = 84.8, 3.8$  Hz, 1F). HRMS (ESI,  $m/z$ ): calcd for  $\text{C}_{10}\text{H}_{11}\text{F}_2^+ [\text{M} + \text{H}]^+$ : 169.0823, found 169.0837.

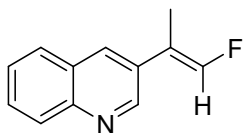

**3i**<sup>5</sup>, General procedure A, purified by silica gel chromatography (PE : EA = 10:1). Colorless oil, 17.2 mg (46% yield,  $E/Z = 75/25$ );  $^1\text{H}$  NMR (400 MHz,  $\text{CDCl}_3$ )  $\delta$  (*E* isomer) 8.90 (d,  $J = 2.3$  Hz, 1H), 8.09 (d,  $J = 8.4$  Hz, 1H), 8.01 (d,  $J = 2.3$  Hz, 1H), 7.81 (d,  $J = 8.1$  Hz, 1H), 7.71 – 7.67 (m, 1H), 7.57 – 7.53 (m, 1H), 7.09 (dq,  $J = 83.6, 1.6$  Hz, 1H), 2.16 (dd,  $J = 3.8, 1.6$  Hz, 3H).  $^{13}\text{C}$  NMR (101 MHz,  $\text{CDCl}_3$ )  $\delta$  (*E* isomer) 148.5 (d,  $J = 2.2$  Hz), 147.5, 147.1 (d,  $J = 261.0$  Hz), 132.3 (d,  $J = 4.5$  Hz), 130.6 (d,  $J = 9.0$  Hz), 129.5, 129.3, 128.0, 127.9, 127.2, 117.7 (d,  $J = 11.0$  Hz), 12.2 (d,  $J = 5.8$  Hz).  $^{19}\text{F}$  NMR (376 MHz,  $\text{CDCl}_3$ )  $\delta$  (*E* isomer) -127.07 (dq,  $J = 83.6, 3.8$  Hz). HRMS (ESI,  $m/z$ ): calcd for  $\text{C}_{12}\text{H}_{11}\text{NF}^+ [\text{M} + \text{H}]^+$ : 188.0870, found 188.0871.

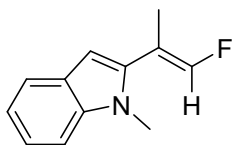

**3j**, General procedure A, purified by silica gel chromatography (PE : EA = 40:1). Yellow solid, m.p. 55 – 56 °C, 23.5 mg (62% yield,  $E/Z = 67/33$ );  $^1\text{H}$  NMR (400 MHz,  $\text{CDCl}_3$ )  $\delta$  (*E* isomer) 7.59 (d,  $J = 7.9$  Hz, 1H), 7.31 (d,  $J = 8.3$  Hz, 1H), 7.26 – 7.21 (m, 1H), 7.14 – 7.10 (m, 1H), 6.80 (dq,  $J = 84.8, 1.6$  Hz, 1H), 6.40 (s, 1H), 3.70 (s, 3H), 2.06 (dd,  $J = 3.6, 1.6$  Hz, 3H).  $^{13}\text{C}$  NMR (101 MHz,  $\text{CDCl}_3$ )  $\delta$  (*E* isomer) 148.2 (d,  $J = 265.2$  Hz), 138.4, 137.5 (d,  $J = 12.2$  Hz), 127.7, 121.9, 120.6, 119.9, 112.5 (d,  $J = 12.4$  Hz), 109.4, 101.7 (d,  $J = 2.9$  Hz), 30.9, 14.1 (d,  $J = 3.8$  Hz).  $^{19}\text{F}$  NMR (376 MHz,  $\text{CDCl}_3$ )  $\delta$  (*E* isomer) -123.62 (dq,  $J = 84.8, 3.6$  Hz). HRMS (ESI,  $m/z$ ): calcd for  $\text{C}_{12}\text{H}_{13}\text{NF}^+ [\text{M} + \text{H}]^+$ : 190.1027, found 190.1032.

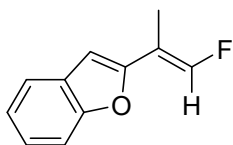

**3k**<sup>5</sup>, General procedure A, purified by silica gel chromatography (PE). Colorless oil, 11.3 mg (32% yield,  $E/Z = 67/33$ );  $^1\text{H}$  NMR (400 MHz,  $\text{CDCl}_3$ )  $\delta$  (*E* isomer) 7.55 – 7.34 (m, 3H), 7.26 – 7.19 (m,

2H), 6.60 (s, 1H), 2.03 (dd,  $J = 3.6, 1.6$  Hz, 3H).  $^{13}\text{C}$  NMR (101 MHz,  $\text{CDCl}_3$ )  $\delta$  (*E* isomer) 154.6, 154.2 (d,  $J = 8.8$  Hz), 148.4 (d,  $J = 261.6$  Hz), 128.7, 124.6, 122.9, 120.6, 111.4 (d,  $J = 15.2$  Hz), 110.9, 103.1 (d,  $J = 10.1$  Hz), 9.7 (d,  $J = 5.8$  Hz).  $^{19}\text{F}$  NMR (376 MHz,  $\text{CDCl}_3$ )  $\delta$  (*E* isomer) -132.54 (dq,  $J = 82.8, 3.6$  Hz). HRMS (ESI,  $m/z$ ): calcd for  $\text{C}_{11}\text{H}_{10}\text{OF}^+$  [ $\text{M} + \text{H}$ ] $^+$ : 177.0710, found 177.0725.

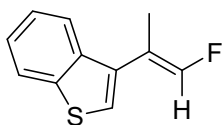

**3I<sup>5</sup>**, General procedure A, purified by silica gel chromatography (PE). White solid, m.p. 71 – 72 °C, 20.8 mg (54% yield, *E/Z* = 66/34);  $^1\text{H}$  NMR (400 MHz,  $\text{CDCl}_3$ )  $\delta$  (*E* isomer) 7.76 – 7.68 (m, 2H), 7.35 – 7.08 (m, 3H), 7.20 (s, 1H), 2.14 (dd,  $J = 3.6, 1.6$  Hz, 3H).  $^{13}\text{C}$  NMR (101 MHz,  $\text{CDCl}_3$ )  $\delta$  (*E* isomer) 147.1 (d,  $J = 262.9$  Hz), 140.3 (d,  $J = 8.6$  Hz), 139.9, 138.3, 124.7, 124.6, 123.3, 122.2, 120.8 (d,  $J = 8.0$  Hz), 115.9 (d,  $J = 13.8$  Hz), 12.1 (d,  $J = 5.4$  Hz).  $^{19}\text{F}$  NMR (376 MHz,  $\text{CDCl}_3$ )  $\delta$  (*E* isomer) -129.18 (dq,  $J = 83.6, 3.6$  Hz). HRMS (ESI,  $m/z$ ): calcd for  $\text{C}_{11}\text{H}_{10}\text{FS}^+$  [ $\text{M} + \text{H}$ ] $^+$ : 193.0482, found 193.0483.

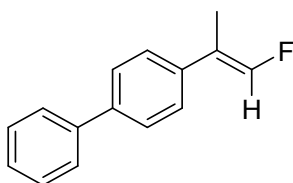

**3m<sup>5</sup>**, General procedure A, (from trifluoromethyl alkene), purified by silica gel chromatography (PE). White solid, 35.2 mg (83% yield, *E/Z* = 85/15);  $^1\text{H}$  NMR (400 MHz,  $\text{CDCl}_3$ ) (mixture of isomers)  $\delta$  (*E* isomer) 7.63 – 7.58 (m, 4H), 7.49 – 7.45 (m, 2H), 7.42 – 7.37 (m, 3H), 7.00 (dq,  $J = 84.8, 1.6$  Hz, 1H), 2.11 (dd,  $J = 3.8, 1.6$  Hz, 3H); (*Z* isomer) 6.72 (dq,  $J = 84.6, 1.6$  Hz, 1H), 1.97 (dd,  $J = 5.0, 1.6$  Hz, 3H). HRMS (ESI,  $m/z$ ): calcd for  $\text{C}_{15}\text{H}_{13}\text{FNa}^+$  [ $\text{M} + \text{Na}$ ] $^+$ : 235.0893, found 235.0919.

**3m**, General procedure B, (from *gem*-difluoroalkene),  $\text{Ph}_2\text{SiH}_2$  (73.7 mg, 0.40 mmol), 100 °C, purified by silica gel chromatography (PE). White solid, m.p. 106 – 107 °C, 28.4 mg (67% yield, *E/Z* = 91/9);  $^1\text{H}$  NMR (400 MHz,  $\text{CDCl}_3$ ) (mixture of isomers)  $\delta$  (*E* isomer) 7.65 – 7.56 (m, 4H), 7.49 – 7.45 (m, 2H), 7.43 – 7.35 (m, 3H), 7.00 (dq,  $J = 84.8, 1.6$  Hz, 1H), 2.11 (dd,  $J = 3.8, 1.6$  Hz, 3H); (*Z* isomer) 6.72 (dq,  $J = 84.4, 1.6$  Hz, 1H), 1.97 (dd,  $J = 5.0, 1.6$  Hz, 3H).  $^{13}\text{C}$  NMR (101 MHz,  $\text{CDCl}_3$ ) (mixture of isomers)  $\delta$  146.2 (d,  $J = 258.5$  Hz), 140.7, 140.4, 136.7 (d,  $J = 8.8$  Hz), 129.0, 127.5, 127.4, 127.1, 126.4 (d,  $J = 3.5$  Hz), 119.8 (d,  $J = 9.8$  Hz), 12.3 (d,  $J = 6.3$  Hz).  $^{19}\text{F}$  NMR (376 MHz,  $\text{CDCl}_3$ ) (mixture of isomers)  $\delta$  (*Z* isomer) -127.99 – -128.26 (m); (*E* isomer) -130.71 – -130.96 (m).

HRMS (ESI, m/z): calcd for C<sub>15</sub>H<sub>14</sub>F<sup>+</sup> [M + H]<sup>+</sup>: 213.1074, found 213.1064.

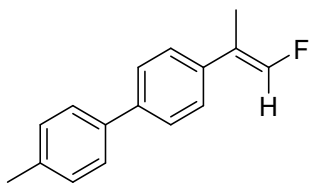

**3n**, General procedure A, purified by silica gel chromatography (PE). White solid, m.p. 128 – 129 °C, 43.9 mg (97% yield, *E/Z* = 84/16); <sup>1</sup>H NMR (400 MHz, CDCl<sub>3</sub>) (mixture of isomers) δ (*E* isomer) 7.60 – 7.51 (m, 4H), 7.41 – 7.38 (m, 2H), 7.29 – 7.27 (m, 2H), 6.99 (dq, *J* = 84.8, 1.6 Hz, 1H), 2.43 (s, 3H), 2.11 (dd, *J* = 3.8, 1.6 Hz, 3H); (*Z* isomer) 6.72 (dq, *J* = 84.4, 1.6 Hz, 1H), 1.97 (dd, *J* = 4.8, 1.6 Hz, 3H). <sup>13</sup>C NMR (101 MHz, CDCl<sub>3</sub>) (mixture of isomers) δ 146.1 (d, *J* = 258.1 Hz), 140.3, 137.9, 137.3, 136.3 (d, *J* = 8.9 Hz), 129.7, 127.2, 126.9, 126.3 (d, *J* = 3.4 Hz), 119.8 (d, *J* = 10.1 Hz), 21.2, 12.3 (d, *J* = 5.9 Hz). <sup>19</sup>F NMR (376 MHz, CDCl<sub>3</sub>) (mixture of isomers) δ (*Z* isomer) -128.01 – -128.2 (m); (*E* isomer) -130.92 (dq, *J* = 84.8, 3.8 Hz). HRMS (ESI, m/z): calcd for C<sub>16</sub>H<sub>16</sub>F<sup>+</sup> [M + H]<sup>+</sup>: 227.1231, found 227.1254.

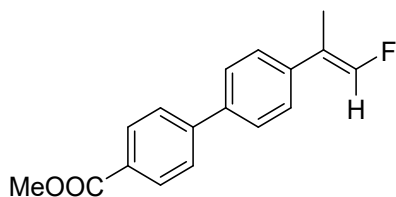

**3o**, General procedure A, purified by silica gel chromatography (PE). White solid, m.p. 132 – 133 °C, 29.8 mg (55% yield, *E/Z* = 79/21); <sup>1</sup>H NMR (400 MHz, CDCl<sub>3</sub>) (mixture of isomers) δ (*E* isomer) 8.12 – 8.10 (m, 2H), 7.69 – 7.59 (m, 4H), 7.42 – 7.40 (m, 2H), 6.98 (dq, *J* = 84.8, 1.6 Hz, 1H), 3.94 (s, 3H), 2.08 (dd, *J* = 3.8, 1.6 Hz, 3H); (*Z* isomer) 6.71 (dq, *J* = 84.4, 1.6 Hz, 1H), 1.95 (dd, *J* = 4.8, 1.6 Hz, 3H). <sup>13</sup>C NMR (101 MHz, CDCl<sub>3</sub>) (mixture of isomers) δ 167.1, 146.4 (d, *J* = 258.7 Hz), 139.1, 137.6 (d, *J* = 9.3 Hz), 130.3, 127.5, 127.2, 127.1, 127.0, 126.5 (d, *J* = 3.0 Hz), 119.7 (d, *J* = 10.2 Hz), 52.3, 12.3 (d, *J* = 5.9 Hz). <sup>19</sup>F NMR (376 MHz, CDCl<sub>3</sub>) (mixture of isomers) δ (*Z* isomer) -127.65 (dq, *J* = 84.4, 4.8 Hz); (*E* isomer) -130.04 – -130.29 (m). HRMS (ESI, m/z): calcd for C<sub>17</sub>H<sub>16</sub>FO<sub>2</sub><sup>+</sup> [M + H]<sup>+</sup>: 271.1129, found 271.1150.

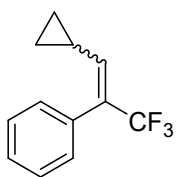

**1p**, colorless oil, *E/Z* = 74/26; <sup>1</sup>H NMR (400 MHz, CDCl<sub>3</sub>) (mixture of isomers) δ (*E* isomer) 7.42 –



7.37 (m, 5H), 5.75 – 5.72 (m, 1H), 1.44 – 1.35 (m, 1H), 0.85 – 0.82 (m, 2H), 0.61 – 0.59 (m, 2H); (*Z* isomer) 5.29 (d,  $J = 10.9$  Hz, 1H).  $^{13}\text{C}$  NMR (101 MHz,  $\text{CDCl}_3$ ) (mixture of isomers)  $\delta$  141.3 (q,  $J = 5.8$  Hz), 130.2, 128.6, 128.4, 128.4, 128.2, 123.9 (q,  $J = 272.0$  Hz), 11.2, 8.3.  $^{19}\text{F}$  NMR (376 MHz,  $\text{CDCl}_3$ ) (mixture of isomers)  $\delta$  (*Z* isomer) -57.07; (*E* isomer) -64.99.

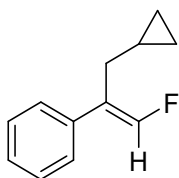

**3p**, General procedure A, after adding  $\text{Zn}(\text{OAc})_2$  (3.7mg, 0.02 mmol) and Xantphos (11.6 mg, 0.02 mmol), add NaOAc (16.4 mg, 0.2 mmol) and use  $\text{PhSiH}_3$  as silane, purified by silica gel chromatography (PE). Colorless oil, NMR yield 33%,  $E/Z = 77/23$ .  $^1\text{H}$  NMR (400 MHz,  $\text{CDCl}_3$ )  $\delta$  (*Z* isomer) 7.43 – 7.41 (m, 2H), 7.38 – 7.34 (m, 2H), 7.29 – 7.27 (m, 1H), 6.70 (dt,  $J = 84.8$ , 1.6 Hz, 1H), 2.21 – 2.18 (m, 2H), 0.82 – 0.73 (m, 1H), 0.47 – 0.43 (m, 2H), 0.08 (dt,  $J = 6.0$ , 4.5 Hz, 2H).  $^{13}\text{C}$  NMR (151 MHz,  $\text{CD}_2\text{Cl}_2$ )  $\delta$  (*Z* isomer) 144.3 (d,  $J = 259.7$  Hz), 135.5, 128.1, 128.1, 127.2, 122., 35.5 (d,  $J = 6.3$  Hz), 9.4, 4.5.  $^{19}\text{F}$  NMR (376 MHz,  $\text{CDCl}_3$ )  $\delta$  (*Z* isomer) -133.26 (dt,  $J = 84.8$ , 4.2 Hz). HRMS (ESI,  $m/z$ ): calcd for  $\text{C}_{12}\text{H}_{17}\text{NF}^+$  [ $\text{M} + \text{NH}_4$ ] $^+$ : 194.1340, found 194.1348.

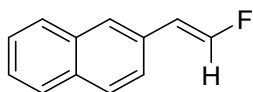

**5a<sup>6</sup>**, General procedure B, purified by silica gel chromatography (PE). White solid, m.p. 67 – 68 °C, 28.9 mg (84% yield,  $E/Z = 95/5$ );  $^1\text{H}$  NMR (400 MHz,  $\text{CDCl}_3$ ) (mixture of isomers)  $\delta$  (*E* isomer) 7.82 – 7.77 (m, 3H), 7.65 (s, 1H), 7.49 – 7.20 (m, 4H), 6.56 (dd,  $J = 19.6$ , 11.2 Hz, 1H); (*Z* isomer) 6.74 (dd,  $J = 82.8$ , 5.6 Hz, 1H), 5.78 (dd,  $J = 44.8$ , 5.6 Hz, 1H).  $^{13}\text{C}$  NMR (101 MHz,  $\text{CDCl}_3$ ) (mixture of isomers)  $\delta$  150.6 (d,  $J = 259.3$  Hz), 133.7, 132.9, 130.3 (d,  $J = 11.8$  Hz), 128.6, 127.9, 126.6, 126.1, 125.9 (d,  $J = 5.0$  Hz), 123.5, 114.3 (d,  $J = 16.3$  Hz).  $^{19}\text{F}$  NMR (376 MHz,  $\text{CDCl}_3$ ) (mixture of isomers)  $\delta$  (*Z* isomer) -121.74 (dd,  $J = 82.8$ , 44.8 Hz); (*E* isomer) -129.39 (dd,  $J = 83.2$ , 19.6 Hz). HRMS (ESI,  $m/z$ ): calcd for  $\text{C}_{12}\text{H}_{10}\text{F}^+$  [ $\text{M} + \text{H}$ ] $^+$ : 173.0761, found 173.0756.

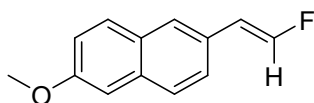

**5b**, General procedure B, purified by silica gel chromatography (PE : EA = 20:1). White solid, m.p. 77 – 78 °C, 38.4 mg (95% yield,  $E/Z = 94/6$ );  $^1\text{H}$  NMR (400 MHz,  $\text{CDCl}_3$ ) (mixture of isomers)  $\delta$  (*E*

isomer) 7.66 – 7.64 (m, 2H), 7.55 (s, 1H), 7.37 – 7.08 (m, 4H), 6.50 (dd,  $J = 19.6, 11.4$  Hz, 1H), 3.89 (s, 3H); (*Z* isomer) 6.69 (dd,  $J = 82.8, 5.4$  Hz, 1H), 5.71 (dd,  $J = 44.8, 5.4$  Hz, 1H).  $^{13}\text{C}$  NMR (101 MHz,  $\text{CDCl}_3$ ) (mixture of isomers)  $\delta$  157.9, 150.1 (d,  $J = 258.0$  Hz), 134.1, 129.4, 129.1, 128.0 (d,  $J = 11.7$  Hz), 127.4, 125.7 (d,  $J = 4.8$  Hz), 124.1, 119.3, 114.2 (d,  $J = 16.5$  Hz), 106.0, 55.4.  $^{19}\text{F}$  NMR (565 MHz,  $\text{CDCl}_3$ ) (mixture of isomers)  $\delta$  (*Z* isomer) -122.87 (dd,  $J = 82.8, 44.8$  Hz); (*E* isomer) -130.75 (dd,  $J = 83.4, 19.6$  Hz). HRMS (ESI,  $m/z$ ): calcd for  $\text{C}_{13}\text{H}_{12}\text{FO}^+$  [ $\text{M} + \text{H}$ ] $^+$ : 203.0867, found 203.0869

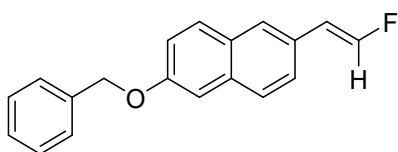

**5c**, General procedure B, purified by silica gel chromatography (PE). White solid, m.p. 103 – 104 °C, 36.1 mg (65% yield,  $E/Z = 94/6$ );  $^1\text{H}$  NMR (600 MHz,  $\text{CDCl}_3$ ) (mixture of isomers)  $\delta$  (*E* isomer) 7.71 – 7.66 (m, 2H), 7.59 (s, 1H), 7.51 – 7.49 (m, 2H), 7.44 – 7.31 (m, 2H), 7.37 – 7.20 (m, 5H), 6.53 (dd,  $J = 19.6, 11.4$  Hz, 1H), 5.18 (s, 2H); (*Z* isomer) 6.72 (dd,  $J = 83.1, 5.4$  Hz, 1H), 5.74 (dd,  $J = 45.0, 5.4$  Hz, 1H).  $^{13}\text{C}$  NMR (151 MHz,  $\text{CDCl}_3$ ) (mixture of isomers)  $\delta$  157.1, 150.1 (d,  $J = 257.6$  Hz), 136.9, 134.0, 129.4, 129.2, 128.8, 128.2, 128.1 (d,  $J = 11.8$  Hz), 127.7, 127.5, 125.7 (d,  $J = 4.7$  Hz), 124.1, 119.7, 114.2 (d,  $J = 16.4$  Hz), 107.4, 70.2.  $^{19}\text{F}$  NMR (565 MHz,  $\text{CDCl}_3$ ) (mixture of isomers)  $\delta$  (*Z* isomer) -122.77 (dd,  $J = 83.1, 45.0$  Hz); (*E* isomer) -130.62 (dd,  $J = 83.4, 19.6$  Hz). HRMS (ESI,  $m/z$ ): calcd for  $\text{C}_{19}\text{H}_{19}\text{FNO}^+$  [ $\text{M} + \text{NH}_4$ ] $^+$ : 296.1445, found 296.1453.

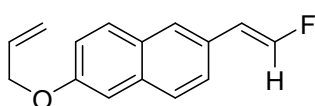

**5d**, General procedure B, purified by silica gel chromatography (PE : EA = 20:1). White solid, m.p. 60 – 61 °C, 34.7 mg (76% yield,  $E/Z = 95/5$ );  $^1\text{H}$  NMR (600 MHz,  $\text{CDCl}_3$ ) (mixture of isomers)  $\delta$  (*E* isomer) 7.70 – 7.65 (m, 2H), 7.57 (s, 1H), 7.37 – 7.17 (m, 3H), 7.12 (s, 1H), 6.52 (dd,  $J = 19.2, 11.4$  Hz, 1H), 6.16 – 6.10 (m, 1H), 5.48 (d,  $J = 17.4$  Hz, 1H), 5.34 (d,  $J = 10.2$  Hz, 1H), 4.65 (d,  $J = 5.4$  Hz, 2H); (*Z* isomer) 6.71 (dd,  $J = 82.8, 5.4$  Hz, 1H), 5.74 (dd,  $J = 45.0, 5.4$  Hz, 1H).  $^{13}\text{C}$  NMR (151 MHz,  $\text{CDCl}_3$ ) (mixture of isomers)  $\delta$  156.8, 150.1 (d,  $J = 258.5$  Hz), 134.0, 133.2, 129.4, 129.2, 128.1 (d,  $J = 12.1$  Hz), 127.5, 125.7 (d,  $J = 5.3$  Hz), 124.1, 119.6, 118.0, 114.2 (d,  $J = 16.4$  Hz), 107.2, 69.0.  $^{19}\text{F}$  NMR (565 MHz,  $\text{CDCl}_3$ ) (mixture of isomers)  $\delta$  (*Z* isomer) -122.84 (dd,  $J = 82.8, 45.0$  Hz); (*E* isomer) -130.70 (dd,  $J = 83.6, 19.2$  Hz). HRMS (ESI,  $m/z$ ): calcd for  $\text{C}_{15}\text{H}_{14}\text{FO}^+$  [ $\text{M} +$

$[H]^+$ : 229.1023, found 229.1026.

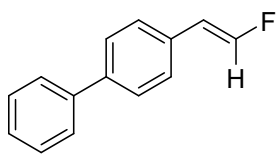

**5e<sup>6</sup>**, General procedure B, purified by silica gel chromatography (PE). White solid, m.p. 100 – 101 °C, 33.7 mg (85% yield, *E/Z* = 95/5); <sup>1</sup>H NMR (600 MHz, CDCl<sub>3</sub>) (mixture of isomers) δ (*E* isomer) 7.61 – 7.56 (m, 4H), 7.47 – 7.45 (m, 2H), 7.38 – 7.16 (m, 4H), 6.45 (dd, *J* = 19.2, 11.4 Hz, 1H); (*Z* isomer) 6.70 (dd, *J* = 82.8, 5.4 Hz, 1H), 5.68 (dd, *J* = 45.0, 5.4 Hz, 1H). <sup>13</sup>C NMR (151 MHz, CDCl<sub>3</sub>) (mixture of isomers) δ 150.3 (d, *J* = 259.5 Hz), 140.7, 140.4 (d, *J* = 2.2 Hz), 131.8 (d, *J* = 12.0 Hz), 129.0, 127.6, 127.5, 127.0, 126.7 (d, *J* = 3.2 Hz), 113.7 (d, *J* = 16.1 Hz). <sup>19</sup>F NMR (376 MHz, CDCl<sub>3</sub>) (mixture of isomers) δ (*Z* isomer) -121.68 (dd, *J* = 82.8, 45.0 Hz); (*E* isomer) -129.47 (dd, *J* = 83.2, 19.2 Hz). HRMS (ESI, *m/z*): calcd for C<sub>14</sub>H<sub>15</sub>FN<sup>+</sup> [*M* + NH<sub>4</sub>]<sup>+</sup>: 216.1183, found 216.1178.

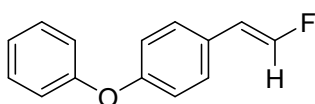

**5f**, General procedure B, purified by silica gel chromatography (PE). White solid, m.p. 69 – 70 °C, 20.2 mg (47% yield, *E/Z* = 98/2); <sup>1</sup>H NMR (600 MHz, CDCl<sub>3</sub>) (mixture of isomers) δ (*E* isomer) 7.37 – 7.35 (m, 2H), 7.23 – 7.06 (m, 4H), 7.04 – 6.97 (m, 4H), 6.40 (dd, *J* = 19.8, 11.4 Hz, 1H); (*Z* isomer) 6.65 (dd, *J* = 82.8, 5.4 Hz, 1H), 5.60 (dd, *J* = 45.0, 5.4 Hz, 1H). <sup>13</sup>C NMR (101 MHz, CDCl<sub>3</sub>) (mixture of isomers) δ 157.2, 156.9 (d, *J* = 2.2 Hz), 149.8 (d, *J* = 258.0 Hz), 123.0, 127.8, 127.7, 127.6 (d, *J* = 3.0 Hz), 123.6, 119.1 (d, *J* = 16.8 Hz), 113.3 (d, *J* = 16.1 Hz). <sup>19</sup>F NMR (565 MHz, CDCl<sub>3</sub>) (mixture of isomers) δ (*Z* isomer) -123.86 (dd, *J* = 82.8, 45.0 Hz); (*E* isomer) -130.87 (dd, *J* = 83.5, 19.8 Hz). HRMS (ESI, *m/z*): calcd for C<sub>14</sub>H<sub>12</sub>FO<sup>+</sup> [*M* + H]<sup>+</sup>: 215.0867, found 215.0888.

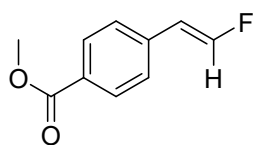

**5g**, General procedure B, purified by silica gel chromatography (PE : DCM = 4:1). Colorless oil, 25.2 mg (70% yield, *E/Z* = 92/8); <sup>1</sup>H NMR (400 MHz, CDCl<sub>3</sub>) δ (*E* isomer) 7.99 – 7.97 (m, 2H), 7.37 – 7.14 (m, 3H), 6.42 (dd, *J* = 19.2, 11.6 Hz, 1H), 3.91 (s, 3H). <sup>13</sup>C NMR (151 MHz, CDCl<sub>3</sub>) δ (*E* isomer) 166.9, 151.7 (d, *J* = 263.0 Hz), 137.6 (d, *J* = 12.1 Hz), 130.3, 129.3, 126.1 (d, *J* = 3.3 Hz), 113.6 (d, *J* = 16.5 Hz), 52.3. <sup>19</sup>F NMR (376 MHz, CDCl<sub>3</sub>) (mixture of isomers) δ (*Z* isomer) -118.32

(dd,  $J = 81.9, 44.3$  Hz); (*E* isomer) -125.70 (dd,  $J = 82.0, 19.2$  Hz). HRMS (ESI,  $m/z$ ): calcd for  $C_{10}H_{10}FO_2^+$  [ $M + H$ ] $^+$ : 181.0659, found 181.0669.

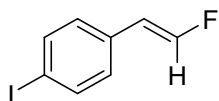

**5h**, General procedure B,  $Ph_2SiH_2$  (73.7 mg, 0.40 mmol), 100 °C, purified by silica gel chromatography (PE). Yellow oil, 39.7 mg (80% yield,  $E/Z = 96/4$ );  $^1H$  NMR (400 MHz,  $CDCl_3$ ) (mixture of isomers)  $\delta$  (*E* isomer) 7.64 – 7.61 (m, 2H), 7.17 (dd,  $J = 82.4, 11.6$  Hz, 1H), 7.00 – 6.97 (m, 2H), 6.32 (dd,  $J = 19.2, 11.6$  Hz, 1H); (*Z* isomer) 6.67 (dd,  $J = 82.4, 5.4$  Hz, 1H), 5.55 (dd,  $J = 44.2, 5.4$  Hz, 1H).  $^{13}C$  NMR (101 MHz,  $CDCl_3$ ) (mixture of isomers)  $\delta$  150.7 (d,  $J = 260.9$  Hz), 138.0, 132.3 (d,  $J = 12.3$  Hz), 128.0 (d,  $J = 3.4$  Hz), 113.3 (d,  $J = 16.7$  Hz), 92.7.  $^{19}F$  NMR (376 MHz,  $CDCl_3$ ) (mixture of isomers)  $\delta$  (*Z* isomer) -120.33 (dd,  $J = 82.4, 44.2$  Hz); (*E* isomer)-128.04 (dd,  $J = 82.4, 19.2$  Hz). HRMS (ESI,  $m/z$ ): calcd for  $C_8H_6FIK^+$  [ $M + K$ ] $^+$ : 286.9130, found 286.9155.

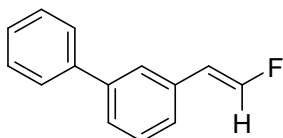

**5i**, General procedure B, purified by silica gel chromatography (PE). White solid, m.p. 74 – 75 °C, 39.2 mg (99% yield,  $E/Z = 96/4$ );  $^1H$  NMR (400 MHz,  $CDCl_3$ ) (mixture of isomers)  $\delta$  (*E* isomer) 7.61 – 7.58 (m, 2H), 7.50 – 7.42 (m, 4H), 7.40 – 7.38 (m, 2H), 7.26 – 7.24 (m, 1H), 7.24 (dd,  $J = 83.2, 11.6$  Hz, 1H), 6.48 (dd,  $J = 19.2, 11.2$  Hz, 1H); (*Z* isomer) 6.71 (dd,  $J = 82.4, 5.4$  Hz, 1H), 5.70 (dd,  $J = 44.4, 5.4$  Hz, 1H).  $^{13}C$  NMR (101 MHz,  $CDCl_3$ ) (mixture of isomers)  $\delta$  150.5 (d,  $J = 259.5$  Hz), 142.0, 141.0, 133.3 (d,  $J = 12.1$  Hz), 129.3, 129.0, 127.7, 127.3, 126.5 (d,  $J = 2.0$  Hz), 125.3 (d,  $J = 3.0$  Hz), 125.1 (d,  $J = 2.9$  Hz), 114.0 (d,  $J = 16.0$  Hz).  $^{19}F$  NMR (376 MHz,  $CDCl_3$ ) (mixture of isomers)  $\delta$  (*Z* isomer) -121.47 (dd,  $J = 82.4, 44.4$  Hz); (*E* isomer) -129.23 (dd,  $J = 83.2, 19.2$  Hz). HRMS (ESI,  $m/z$ ): calcd for  $C_{14}H_{15}FN^+$  [ $M + NH_4$ ] $^+$ : 216.1183, found 216.1193.

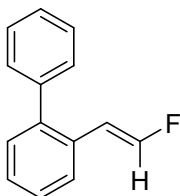

**5j**, General procedure B, purified by silica gel chromatography (PE). Colorless oil, 36.5 mg (92% yield,  $E/Z = 96/4$ );  $^1H$  NMR (600 MHz,  $CDCl_3$ ) (mixture of isomers)  $\delta$  (*E* isomer) 7.47 – 7.43 (m, 3H), 7.41 – 7.34 (m, 6H), 7.07 (dd,  $J = 84.3, 11.4$  Hz, 1H), 6.40 (dd,  $J = 19.8, 11.4$  Hz, 1H); (*Z*

isomer) 6.63 (dd,  $J = 83.4, 5.4$  Hz, 1H), 5.63 (dd,  $J = 45.0, 5.4$  Hz, 1H).  $^{13}\text{C}$  NMR (101 MHz,  $\text{CDCl}_3$ ) (mixture of isomers)  $\delta$  150.2 (d,  $J = 259.1$  Hz), 141.1 (d,  $J = 4.4$  Hz), 140.8, 130.6, 130.5, 129.7, 128.4, 127.8 (d,  $J = 8.9$  Hz), 127.4, 126.2, 113.3 (d,  $J = 16.7$  Hz).  $^{19}\text{F}$  NMR (565 MHz,  $\text{CDCl}_3$ ) (mixture of isomers)  $\delta$  (*Z* isomer) -124.98 (dd,  $J = 83.4, 45.0$  Hz); (*E* isomer) -127.12 (dd,  $J = 84.3, 19.8$  Hz). HRMS (ESI,  $m/z$ ): calcd for  $\text{C}_{14}\text{H}_{11}\text{FK}^+$  [ $\text{M} + \text{K}$ ] $^+$ : 237.0476, found 237.0445.

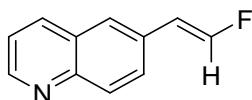

**5k**, General procedure B, purified by silica gel chromatography (PE : EA = 5:1). White solid, m.p. 72 – 73 °C, 32.9 mg (95% yield,  $E/Z = 95/5$ );  $^1\text{H}$  NMR (600 MHz,  $\text{CDCl}_3$ )  $\delta$  (*E* isomer) 8.86 (s, 1H), 8.09 – 8.02 (m, 2H), 7.63 – 7.23 (m, 4H), 6.55 (dd,  $J = 19.2, 11.4$  Hz, 1H).  $^{13}\text{C}$  NMR (151 MHz,  $\text{CDCl}_3$ )  $\delta$  (*E* isomer) 151.2 (d,  $J = 252.0$  Hz), 150.3, 147.9, 135.9, 131.2 (d,  $J = 12.1$  Hz), 130.1, 128.6, 127.2, 125.4 (d,  $J = 4.5$  Hz), 121.8, 113.7 (d,  $J = 16.5$  Hz).  $^{19}\text{F}$  NMR (376 MHz,  $\text{CDCl}_3$ ) (mixture of isomers)  $\delta$  (*Z* isomer) -120.58 (dd,  $J = 82.6, 43.8$  Hz); (*E* isomer) -127.48 (dd,  $J = 82.8, 18.9$  Hz). HRMS (ESI,  $m/z$ ): calcd for  $\text{C}_{11}\text{H}_9\text{FN}^+$  [ $\text{M} + \text{H}$ ] $^+$ : 174.0714, found 174.0711.

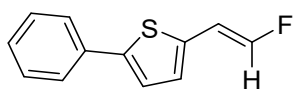

**5l**, General procedure B, purified by silica gel chromatography (PE). White solid, m.p. 65 – 66 °C, 40.1 mg (98% yield,  $E/Z = 89/11$ );  $^1\text{H}$  NMR (400 MHz,  $\text{CDCl}_3$ ) (mixture of isomers)  $\delta$  (*E* isomer) 7.55 – 7.53 (m, 2H), 7.37 – 7.33 (m, 2H), 7.28 – 6.86 (m, 4H), 6.50 (dd,  $J = 17.6, 11.2$  Hz, 1H); (*Z* isomer) 5.93 (dd,  $J = 43.2, 5.2$  Hz, 1H).  $^{13}\text{C}$  NMR (101 MHz,  $\text{CDCl}_3$ ) (mixture of isomers)  $\delta$  149.8 (d,  $J = 262.0$  Hz), 142.8 (d,  $J = 3.4$  Hz), 134.4 (d,  $J = 11.6$  Hz), 134.1, 129.1 (d,  $J = 1.8$  Hz), 127.8, 127.2 (d,  $J = 6.6$  Hz), 125.8, 123.4, 108.5 (d,  $J = 20.3$  Hz).  $^{19}\text{F}$  NMR (376 MHz,  $\text{CDCl}_3$ ) (mixture of isomers)  $\delta$  (*Z* isomer) -120.38 (dd,  $J = 81.8, 43.2$  Hz); (*E* isomer) -129.04 (dd,  $J = 82.2, 17.6$  Hz). HRMS (ESI,  $m/z$ ): calcd for  $\text{C}_{12}\text{H}_{10}\text{FS}^+$  [ $\text{M} + \text{H}$ ] $^+$ : 205.0482, found 205.0479.

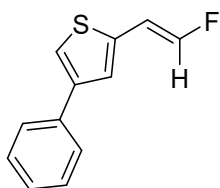

**5m**, General procedure B, purified by silica gel chromatography (PE). White solid, m.p. 68 – 69 °C, 40.4 mg (99% yield,  $E/Z = 89/11$ );  $^1\text{H}$  NMR (600 MHz,  $\text{CDCl}_3$ )  $\delta$  (*E* isomer) 7.53 – 7.51 (m, 2H),

7.38 – 7.35 (m, 2H), 7.28 – 7.26 (m, 1H), 7.23 – 7.07 (m, 3H), 6.53 (dd,  $J = 17.4, 11.4$  Hz, 1H).  $^{13}\text{C}$  NMR (151 MHz,  $\text{CDCl}_3$ )  $\delta$  (*E* isomer) 150.0 (d,  $J = 262.1$  Hz), 142.7, 135.7 (d,  $J = 12.9$  Hz), 135.6, 129.0, 127.5, 126.4, 125.2 (d,  $J = 6.4$  Hz), 118.8 (d,  $J = 3.3$  Hz), 108.3 (d,  $J = 19.8$  Hz).  $^{19}\text{F}$  NMR (565 MHz,  $\text{CDCl}_3$ ) (mixture of isomers)  $\delta$  (*Z* isomer) -120.30 (dd,  $J = 81.8, 43.0$  Hz); (*E* isomer) -128.60 (dd,  $J = 81.6, 17.4$  Hz). HRMS (ESI,  $m/z$ ): calcd for  $\text{C}_{12}\text{H}_{10}\text{FS}^+$  [ $\text{M} + \text{H}$ ] $^+$ : 205.0482, found 205.0480.

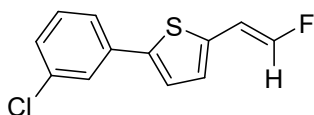

**5n**, General procedure B, purified by silica gel chromatography (PE). Yellow solid, m.p. 74 – 75 °C, 47.1 mg (99% yield,  $E/Z = 83/17$ );  $^1\text{H}$  NMR (400 MHz,  $\text{CDCl}_3$ ) (mixture of isomers)  $\delta$  (*E* isomer) 7.54 – 7.53 (m, 1H), 7.42 – 7.40 (m, 1H), 7.30 – 7.05 (m, 4H), 6.88 – 6.87 (m, 1H), 6.51 (dd,  $J = 17.4, 11.4$  Hz, 1H); (*Z* isomer) 6.68 (dd,  $J = 81.6, 4.8$  Hz, 1H), 5.94 (dd,  $J = 42.8, 4.8$  Hz, 1H).  $^{13}\text{C}$  NMR (151 MHz,  $\text{CD}_2\text{Cl}_2$ ) (mixture of isomers)  $\delta$  150.4 (d,  $J = 261.9$  Hz), 141.2, 136.1, 135.5 (d,  $J = 12.0$  Hz), 135.2, 130.7, 127.9, 127.6 (d,  $J = 6.6$  Hz), 125.8, 124.6, 124.2, 108.6 (d,  $J = 20.0$  Hz).  $^{19}\text{F}$  NMR (376 MHz,  $\text{CDCl}_3$ ) (mixture of isomers)  $\delta$  (*Z* isomer) -119.51 (dd,  $J = 81.6, 42.8$  Hz); (*E* isomer) -128.07 (dd,  $J = 82.1, 17.4$  Hz). HRMS (ESI,  $m/z$ ): calcd for  $\text{C}_{12}\text{H}_9\text{ClFS}^+$  [ $\text{M} + \text{H}$ ] $^+$ : 239.0092, found 239.0093.

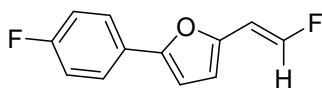

**5o**, General procedure B, purified by silica gel chromatography (PE). White solid, m.p. 167 – 168 °C, 40.8 mg (99% yield,  $E/Z = 90/10$ );  $^1\text{H}$  NMR (600 MHz,  $\text{CDCl}_3$ ) (mixture of isomers)  $\delta$  (*E* isomer) 7.62 – 7.60 (m, 2H), 7.32 (dd,  $J = 82.8, 11.4$  Hz, 1H), 7.09 – 7.06 (m, 2H), 6.56 – 6.55 (m, 1H), 6.27 – 6.23 (m, 2H); (*Z* isomer) 6.64 (dd,  $J = 80.4, 5.4$  Hz, 1H), 5.80 (dd,  $J = 42.0, 5.4$  Hz, 1H).  $^{13}\text{C}$  NMR (151 MHz,  $\text{CDCl}_3$ ) (mixture of isomers)  $\delta$  162.4 (d,  $J = 247.5$  Hz), 152.5 (d,  $J = 3.4$  Hz), 150.3 (d,  $J = 261.4$  Hz), 147.4 (d,  $J = 12.9$  Hz), 126.8 (d,  $J = 3.3$  Hz), 125.6 (d,  $J = 7.8$  Hz), 115.9 (d,  $J = 22.0$  Hz), 110.6 (d,  $J = 8.8$  Hz), 106.5, 104.2 (d,  $J = 20.8$  Hz).  $^{19}\text{F}$  NMR (376 MHz,  $\text{CDCl}_3$ ) (mixture of isomers)  $\delta$  (*Z* isomer) -114.03 – -114.08 (m, 1F), -119.72 (dd,  $J = 80.6$  Hz, 42.0 Hz, 1F); (*E* isomer) -113.88 – -113.93 (m, 1F), -130.71 (dd,  $J = 82.8, 18.1$  Hz, 1F). HRMS (ESI,  $m/z$ ): calcd for  $\text{C}_{12}\text{H}_9\text{F}_2\text{O}^+$  [ $\text{M} + \text{H}$ ] $^+$ : 207.0616, found 207.0603.

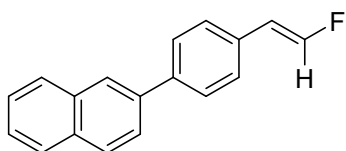

**5p**, General procedure B, purified by silica gel chromatography (PE : EA = 20:1). White solid, m.p. 130 – 131 °C, 45.6 mg (92% yield, *E/Z* = 97/3); <sup>1</sup>H NMR (600 MHz, CDCl<sub>3</sub>) (mixture of isomers) δ (*E* isomer) 8.04 (s, 1H), 7.93 – 7.87 (m, 3H), 7.75 – 7.68 (m, 3H), 7.53 – 7.48 (m, 2H), 7.38 – 7.37 (m, 2H), 7.26 (dd, *J* = 82.8, 11.4 Hz, 1H), 6.47 (dd, *J* = 19.2, 11.4 Hz, 1H); (*Z* isomer) 6.71 (dd, *J* = 82.8, 5.4 Hz, 1H), 5.69 (dd, *J* = 45.0, 5.4 Hz, 1H). <sup>13</sup>C NMR (151 MHz, CDCl<sub>3</sub>) (mixture of isomers) δ 150.4 (d, *J* = 259.7 Hz), 140.4, 138.0, 133.8, 132.8, 131.9 (d, *J* = 12.1 Hz), 128.7, 128.3, 127.9, 127.8, 126.8 (d, *J* = 3.9 Hz), 126.5, 126.2, 125.7, 125.4, 113.7 (d, *J* = 16.4 Hz). <sup>19</sup>F NMR (376 MHz, CDCl<sub>3</sub>) (mixture of isomers) δ (*Z* isomer) -121.51 (dd, *J* = 82.8, 45.0 Hz); (*E* isomer) -129.31 (dd, *J* = 82.8, 19.2 Hz). HRMS (ESI, *m/z*): calcd for C<sub>18</sub>H<sub>14</sub>F<sup>+</sup> [*M* + H]<sup>+</sup>: 249.1074, found 249.1062.

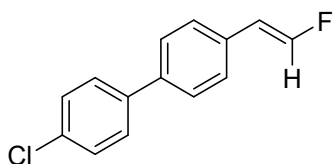

**5q**, General procedure B, purified by silica gel chromatography (PE). White solid, m.p. 105 – 106 °C, 45.9 mg (99% yield, *E/Z* = 94/6); <sup>1</sup>H NMR (400 MHz, CDCl<sub>3</sub>) (mixture of isomers) δ (*E* isomer) 7.52 – 7.50 (m, 4H), 7.43 – 7.40 (m, 2H), 7.35 – 7.12 (m, 3H), 6.44 (dd, *J* = 19.2, 11.4 Hz, 1H); (*Z* isomer) 6.71 (dd, *J* = 82.8, 5.4 Hz, 1H), 5.67 (dd, *J* = 44.8, 5.4 Hz, 1H). <sup>13</sup>C NMR (101 MHz, CDCl<sub>3</sub>) (mixture of isomers) δ 150.5 (d, *J* = 259.6 Hz), 139.2 (d, *J* = 2.2 Hz), 139.1, 133.6, 132.2 (d, *J* = 11.9 Hz), 129.1, 128.2, 127.4, 126.8 (d, *J* = 3.0 Hz), 113.6 (d, *J* = 16.1 Hz). <sup>19</sup>F NMR (376 MHz, CDCl<sub>3</sub>) (mixture of isomers) δ (*Z* isomer) -121.26 (dd, *J* = 82.8, 44.8 Hz); (*E* isomer) -128.93 (dd, *J* = 82.5, 19.2 Hz). HRMS (ESI, *m/z*): calcd for C<sub>14</sub>H<sub>14</sub>ClFN<sup>+</sup> [*M* + NH<sub>4</sub>]<sup>+</sup>: 250.0793, found 250.0789.

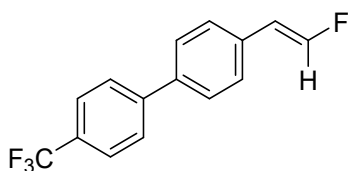

**5r**, General procedure B, purified by silica gel chromatography (PE). White solid, m.p. 86 – 87 °C, 33.5 mg (63% yield, *E/Z* = 96/4); <sup>1</sup>H NMR (400 MHz, CD<sub>2</sub>Cl<sub>2</sub>) (mixture of isomers) δ (*E* isomer) 7.75 – 7.69 (m, 4H), 7.61 – 7.59 (m, 2H), 7.40 – 7.17 (m, 3H), 6.46 (dd, *J* = 19.6, 11.6 Hz, 1H); (*Z*

isomer) 6.74 (dd,  $J = 82.8, 5.2$  Hz, 1H), 5.72 (dd,  $J = 44.8, 5.2$  Hz, 1H).  $^{13}\text{C}$  NMR (101 MHz,  $\text{CDCl}_3$ ) (mixture of isomers)  $\delta$  150.7 (d,  $J = 260.5$  Hz), 144.2, 139.0, 132.9 (d,  $J = 11.9$  Hz), 129.6 (d,  $J = 32.2$  Hz), 127.8, 127.3, 126.9 (d,  $J = 3.0$  Hz), 125.9 (q,  $J = 3.8$  Hz), 124.4 (q,  $J = 271.8$  Hz), 113.5 (d,  $J = 16.2$  Hz).  $^{19}\text{F}$  NMR (376 MHz,  $\text{CDCl}_3$ ) (mixture of isomers)  $\delta$  (*Z* isomer) -120.87 (dd,  $J = 82.8, 44.8$  Hz, 1F); (*E* isomer) -62.42 (s, 3F), -128.45 (dd,  $J = 82.6, 19.6$  Hz, 1F). HRMS (ESI,  $m/z$ ): calcd for  $\text{C}_{15}\text{H}_{11}\text{F}_4^+$  [ $\text{M} + \text{H}$ ] $^+$ : 267.0791, found 267.0789.

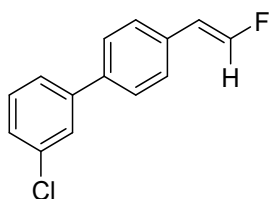

**5s**, General procedure B, purified by silica gel chromatography (PE). Colorless oil, 45.9 mg (99% yield,  $E/Z = 95/5$ );  $^1\text{H}$  NMR (400 MHz,  $\text{CDCl}_3$ ) (mixture of isomers)  $\delta$  (*E* isomer) 7.58 – 5.57 (m, 1H), 7.53 – 7.51 (m, 2H), 7.47 – 7.45 (m, 1H), 7.39 – 7.12 (m, 5H), 6.44 (dd,  $J = 19.2, 11.4$  Hz, 1H); (*Z* isomer) 6.71 (dd,  $J = 82.8, 5.2$  Hz, 1H), 5.67 (dd,  $J = 44.8, 5.2$  Hz, 1H).  $^{13}\text{C}$  NMR (101 MHz,  $\text{CDCl}_3$ ) (mixture of isomers)  $\delta$  150.6 (d,  $J = 260.1$  Hz), 142.5, 139.0 (d,  $J = 2.7$  Hz), 134.9, 132.5 (d,  $J = 12.2$  Hz), 130.2, 127.6, 127.5, 127.2, 126.8 (d,  $J = 3.1$  Hz), 125.2, 113.6 (d,  $J = 16.3$  Hz).  $^{19}\text{F}$  NMR (376 MHz,  $\text{CDCl}_3$ ) (mixture of isomers)  $\delta$  (*Z* isomer) -121.09 (dd,  $J = 82.8, 44.8$  Hz); (*E* isomer) -128.76 (dd,  $J = 83.1, 19.2$  Hz). HRMS (ESI,  $m/z$ ): calcd for  $\text{C}_{14}\text{H}_{11}\text{ClF}^+$  [ $\text{M} + \text{H}$ ] $^+$ : 233.0528, found 233.0551.

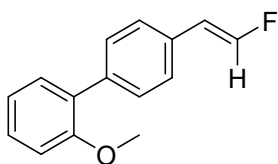

**5t**, General procedure B, purified by silica gel chromatography (PE : EA = 20:1). Colorless oil, 43.8 mg (96% yield,  $E/Z = 97/3$ );  $^1\text{H}$  NMR (400 MHz,  $\text{CDCl}_3$ ) (mixture of isomers)  $\delta$  (*E* isomer) 7.54 – 7.52 (m, 2H), 7.37 – 7.13 (m, 5H), 7.09 – 7.04 (m, 1H), 7.02 (d,  $J = 8.4$  Hz, 1H), 6.47 (dd,  $J = 19.2, 11.2$  Hz, 1H), 3.85 (s, 3H); (*Z* isomer) 6.70 (dd,  $J = 82.8, 5.2$  Hz, 1H), 5.68 (dd,  $J = 44.8, 5.2$  Hz, 1H).  $^{13}\text{C}$  NMR (101 MHz,  $\text{CDCl}_3$ ) (mixture of isomers)  $\delta$  156.6, 150.2 (d,  $J = 259.0$  Hz), 137.9 (d,  $J = 2.1$  Hz), 131.4 (d,  $J = 11.8$  Hz), 130.8, 130.2, 130.0, 128.9, 125.9 (d,  $J = 2.9$  Hz), 121.0, 113.8 (d,  $J = 15.8$  Hz), 111.4, 55.6.  $^{19}\text{F}$  NMR (376 MHz,  $\text{CDCl}_3$ ) (mixture of isomers)  $\delta$  (*Z* isomer) -122.05 (dd,  $J = 82.8, 44.8$  Hz); (*E* isomer) -129.92 (dd,  $J = 83.3, 19.2$  Hz). HRMS (ESI,  $m/z$ ): calcd for  $\text{C}_{15}\text{H}_{14}\text{FO}^+$



[M + H]<sup>+</sup>: 229.1023, found 229.1014.

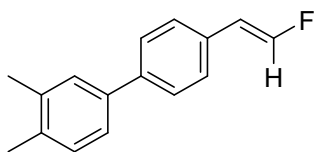

**5u**, General procedure B, purified by silica gel chromatography (PE). White solid, m.p. 105 – 106 °C, 38.4 mg (85% yield, *E/Z* = 96/4); <sup>1</sup>H NMR (400 MHz, CDCl<sub>3</sub>) (mixture of isomers) δ (*E* isomer) 7.51 – 7.49 (m, 2H), 7.34 (s, 1H), 7.34 – 7.05 (m, 5H), 6.39 (dd, *J* = 19.2, 11.2 Hz, 1H), 2.29 (d, *J* = 10.2 Hz, 6H); (*Z* isomer) 6.64 (dd, *J* = 82.8, 5.4 Hz, 1H), 5.61 (dd, *J* = 44.8, 5.4 Hz, 1H). <sup>13</sup>C NMR (151 MHz, CDCl<sub>3</sub>) (mixture of isomers) δ 150.2 (d, *J* = 259.3 Hz), 140.5 (d, *J* = 1.8 Hz), 138.2, 137.1, 136.0, 131.4 (d, *J* = 11.7 Hz), 130.3, 128.3, 127.4, 126.6 (d, *J* = 3.1 Hz), 124.4, 113.7 (d, *J* = 16.1 Hz), 20.0, 19.6. <sup>19</sup>F NMR (376 MHz, CDCl<sub>3</sub>) (mixture of isomers) δ (*Z* isomer) -121.92 (dd, *J* = 82.8, 44.8 Hz); (*E* isomer) -129.79 (dd, *J* = 83.5, 19.2 Hz). HRMS (ESI, *m/z*): calcd for C<sub>16</sub>H<sub>16</sub>F<sup>+</sup> [M + H]<sup>+</sup>: 227.1231, found 227.1224.

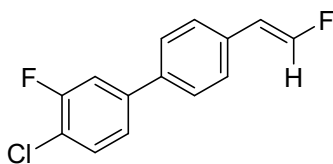

**5v**, General procedure B, purified by silica gel chromatography (PE). Colorless oil, 49.5 mg (99% yield, *E/Z* = 95/5); <sup>1</sup>H NMR (400 MHz, CDCl<sub>3</sub>) (mixture of isomers) δ (*E* isomer) 7.50 – 7.48 (m, 2H), 7.46 – 7.43 (m, 1H), 7.37 – 7.12 (m, 5H), 6.43 (dd, *J* = 19.2, 11.2 Hz, 1H); (*Z* isomer) 6.71 (dd, *J* = 82.4, 5.4 Hz, 1H), 5.67 (dd, *J* = 44.8, 5.4 Hz, 1H). <sup>13</sup>C NMR (101 MHz, CDCl<sub>3</sub>) (mixture of isomers) δ 159.6, 157.1, 150.6 (d, *J* = 260.7 Hz), 141.1 (d, *J* = 6.9 Hz), 137.9, 132.7 (d, *J* = 12.1 Hz), 130.9, 127.3, 126.7 (d, *J* = 3.0 Hz), 123.1 (d, *J* = 3.5 Hz), 120.0 (d, *J* = 17.6 Hz), 114.1 (dd, *J* = 149.8, 18.9 Hz). <sup>19</sup>F NMR (565 MHz, CDCl<sub>3</sub>) (mixture of isomers) δ (*Z* isomer) -120.80 (dd, *J* = 82.4, 44.8 Hz, 1F); (*E* isomer) -115.05 – -115.09 (m, 1F), -128.37 (dd, *J* = 83.3, 19.2 Hz, 1F). HRMS (ESI, *m/z*): calcd for C<sub>14</sub>H<sub>10</sub>ClF<sub>2</sub><sup>+</sup> [M + H]<sup>+</sup>: 251.0434, found 251.0438.

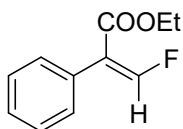

**5w**, General procedure B, purified by silica gel chromatography (PE : EA = 10:1). Colorless oil, 15.9 mg (41% yield, *E/Z* = 73/27); <sup>1</sup>H NMR (400 MHz, CDCl<sub>3</sub>) (mixture of isomers) δ (*E* isomer) 7.74 (d, *J* = 80.8 Hz, 1H), 7.41 – 7.33 (m, 5H), 4.27 (q, *J* = 7.2 Hz, 2H), 1.31 (t, *J* = 7.2 Hz, 3H); (*Z* isomer)

6.99 (d,  $J = 79.6$  Hz, 1H).  $^{13}\text{C}$  NMR (101 MHz,  $\text{CDCl}_3$ ) (mixture of isomers)  $\delta$  166.1 (d,  $J = 16.4$  Hz), 158.0 (d,  $J = 282.0$  Hz), 130.0 (d,  $J = 2.8$  Hz), 128.4, 128.2, 119.8 (d,  $J = 7.3$  Hz), 61.3, 14.3.  $^{19}\text{F}$  NMR (376 MHz,  $\text{CDCl}_3$ ) (mixture of isomers)  $\delta$  (*Z* isomer) -110.62 (d,  $J = 79.6$  Hz); (*E* isomer) -114.70 (d,  $J = 80.8$  Hz). HRMS (ESI,  $m/z$ ): calcd for  $\text{C}_{11}\text{H}_{12}\text{FO}_2^+$  [ $\text{M} + \text{H}$ ] $^+$ : 195.0816, found 195.0817.

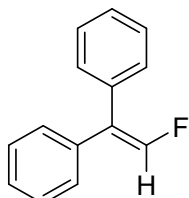

**5x<sup>6</sup>**, General procedure B,  $\text{Ph}_2\text{SiH}_2$  (73.7 mg, 0.40 mmol),  $100^\circ\text{C}$ , purified by silica gel chromatography (PE). Colorless oil, 39.2 mg (99% yield);  $^1\text{H}$  NMR (400 MHz,  $\text{CDCl}_3$ )  $\delta$  7.38 – 7.24 (m, 10H), 6.97 (d,  $J = 83.2$  Hz, 1H).  $^{13}\text{C}$  NMR (101 MHz,  $\text{CDCl}_3$ )  $\delta$  145.9 (d,  $J = 268.7$  Hz), 129.9 (d,  $J = 4.3$  Hz), 128.8 (d,  $J = 3.5$  Hz), 128.7, 128.4, 127.9 (d,  $J = 4.4$  Hz).  $^{19}\text{F}$  NMR (376 MHz,  $\text{CDCl}_3$ )  $\delta$  -128.02 (d,  $J = 83.2$  Hz, 1F). HRMS (ESI,  $m/z$ ): calcd for  $\text{C}_{14}\text{H}_{12}\text{F}^+$  [ $\text{M} + \text{H}$ ] $^+$ : 199.0918, found 199.0905.

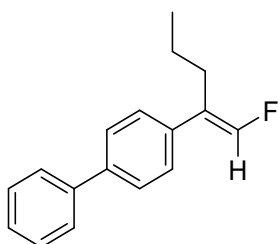

**5y**, General procedure B,  $\text{Ph}_2\text{SiH}_2$  (73.7 mg, 0.40 mmol),  $100^\circ\text{C}$ , purified by silica gel chromatography (PE). White solid, m.p.  $122 - 123^\circ\text{C}$ , 21.7 mg (45% yield,  $E/Z = 91/9$ );  $^1\text{H}$  NMR (400 MHz,  $\text{CDCl}_3$ )  $\delta$  (*E* isomer) 7.60 – 7.56 (m, 4H), 7.46 – 7.43 (m, 2H), 7.37 – 7.35 (m, 3H), 6.87 (d,  $J = 85.6$  Hz, 1H), 2.56 (td,  $J = 7.6, 3.2$  Hz, 2H), 1.50 – 1.41 (m, 2H), 0.95 – 0.91 (t,  $J = 7.2$  Hz, 3H).  $^{13}\text{C}$  NMR (101 MHz,  $\text{CDCl}_3$ )  $\delta$  (*E* isomer) 146.1 (d,  $J = 258.9$  Hz), 140.8, 140.4, 135.8 (d,  $J = 9.3$  Hz), 129.0, 127.5, 127.4, 127.3 (d,  $J = 2.9$  Hz), 127.1, 124.7 (d,  $J = 9.5$  Hz), 28.5 (d,  $J = 4.0$  Hz), 21.1, 13.8.  $^{19}\text{F}$  NMR (376 MHz,  $\text{CDCl}_3$ )  $\delta$  (*E* isomer) -131.07 (dt,  $J = 85.6, 3.2$  Hz). HRMS (ESI,  $m/z$ ): calcd for  $\text{C}_{17}\text{H}_{18}\text{F}^+$  [ $\text{M} + \text{H}$ ] $^+$ : 241.1387, found 241.1373.

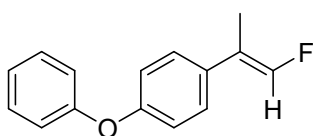

**5z**, General procedure B,  $\text{Ph}_2\text{SiH}_2$  (73.7 mg, 0.40 mmol),  $100^\circ\text{C}$ , purified by silica gel

chromatography (PE). Colorless oil, 14.6 mg (32% yield, *E/Z* = 89/11);  $^1\text{H}$  NMR (400 MHz,  $\text{CD}_2\text{Cl}_2$ ) (mixture of isomers)  $\delta$  (*E* isomer) 7.37 – 7.33 (m, 2H), 7.30 – 7.28 (m, 2H), 7.14 – 7.10 (m, 1H), 7.02 – 6.80 (m, 5H), 2.03 (dd,  $J$  = 3.6, 1.6 Hz, 3H); (*Z* isomer) 6.67 (dq,  $J$  = 84.8, 1.6 Hz, 1H), 1.90 (dd,  $J$  = 4.8, 1.6 Hz, 3H).  $^{13}\text{C}$  NMR (151 MHz,  $\text{CD}_2\text{Cl}_2$ ) (mixture of isomers)  $\delta$  157.5, 157.2, 146.1 (d,  $J$  = 256.4 Hz), 132.9 (d,  $J$  = 8.9 Hz), 130.2, 127.6 (d,  $J$  = 3.4 Hz), 123.8, 119.3, 119.2, 12.4 (d,  $J$  = 5.6 Hz).  $^{19}\text{F}$  NMR (376 MHz,  $\text{CDCl}_3$ ) (mixture of isomers)  $\delta$  (*Z* isomer) -129.36 (dq,  $J$  = 84.8, 4.8 Hz); (*E* isomer) -131.74 (dq,  $J$  = 86.0, 3.6 Hz). HRMS (ESI,  $m/z$ ): calcd for  $\text{C}_{15}\text{H}_{14}\text{FO}^+$  [ $\text{M} + \text{H}$ ] $^+$ : 229.1023, found 229.1022.

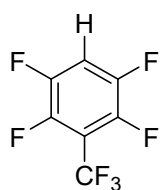

**7a**<sup>7</sup>, General procedure C, when the reaction is completed, trifluoromethylbenzene (0.1 mmol) is added to the sealed tube as the internal standard, resulting in crude  $^{19}\text{F}$  NMR yield of 76%.  $^{19}\text{F}$  NMR (376 MHz, *d*-DMSO)  $\delta$  -55.05 – -55.19 (m, 3F), -136.29 – 136.43 (m, 2F), -141.15 – -141.32 (m, 2F). HRMS (ESI,  $m/z$ ): calcd for  $\text{C}_7\text{HF}_7\text{Na}^+$  [ $\text{M} + \text{Na}$ ] $^+$ : 240.9859, found 240.9870.  $^{19}\text{F}$  NMR data is consistent with the reported literature<sup>7</sup>.

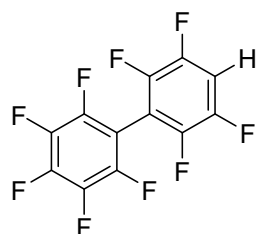

**7b**<sup>8</sup>, General procedure C, purified by silica gel chromatography (PE). White solid, m.p. 75 – 76 °C, 41.7 mg (66% yield);  $^1\text{H}$  NMR (400 MHz,  $\text{CDCl}_3$ )  $\delta$  7.35 – 7.27 (m, 1H).  $^{19}\text{F}$  NMR (376 MHz,  $\text{CDCl}_3$ )  $\delta$  -137.38 – -137.49 (m, 4F), -138.16 – -138.28 (m, 2F), -149.92 – -150.34 (m, 1F), -160.47 – -160.60 (m, 2F). HRMS (ESI,  $m/z$ ): calcd for  $\text{C}_{12}\text{HF}_9\text{K}^+$  [ $\text{M} + \text{K}$ ] $^+$ : 354.9566, found 354.9571.

### 3. Gram-Scale Synthesis and Derivatization Reactions

#### 3.1 Scale-up reaction.

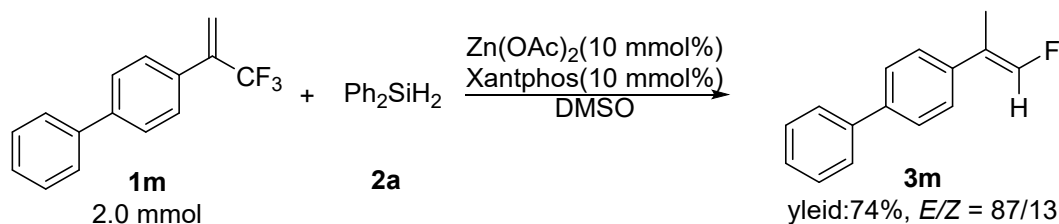

$\text{Zn}(\text{OAc})_2$  (36.7 mg, 0.2 mmol) and Xantphos (115.7 mg, 0.2 mmol) in DMSO (20.0 mL) were charged into a 100 mL pressure tube under argon. The mixture was stirred for 30 min at room temperature. Then  $\text{Ph}_2\text{SiH}_2$  (1105.9 mg, 6 mmol) and trifluoromethyl alkene **1m** (496.2 mg, 2 mmol) were added sequentially to the reaction mixture. The reaction tube was then sealed and placed into an oil bath at 120 °C. After stirred for 24 h, the reaction mixture was quenched with  $\text{H}_2\text{O}$  (20 mL) and extracted with dichloromethane. The organic layer was separated, dried over  $\text{Na}_2\text{SO}_4$ , concentrated, and purified by silica gel chromatography (PE) to give the monofluoride product **3m** (313.8 mg, yield 74%,  $E/Z = 87/13$ ).  $^1\text{H}$  NMR (400 MHz,  $\text{CDCl}_3$ ) (mixture of isomers)  $\delta$  (*E* isomer) 7.63 – 7.53 (m, 4H), 7.46 – 7.44 (m, 2H), 7.41 – 7.30 (m, 3H), 6.98 (dq,  $J = 84.9$ , 1.5 Hz, 1H), 2.09 (dd,  $J = 3.8$ , 1.5 Hz, 3H); (*Z* isomer) 6.71 (dq,  $J = 84.5$ , 1.8 Hz, 1H), 1.96 (dd,  $J = 4.9$ , 1.6 Hz, 3H).  $^{13}\text{C}$  NMR (101 MHz,  $\text{CDCl}_3$ ) (mixture of isomers)  $\delta$  146.2 (d,  $J = 258.6$  Hz), 140.8, 140.4, 136.7 (d,  $J = 8.8$  Hz), 129.0, 127.5, 127.4, 127.1, 126.4 (d,  $J = 3.0$  Hz), 119.8 (d,  $J = 10.1$  Hz), 12.3 (d,  $J = 5.9$  Hz).  $^{19}\text{F}$  NMR (376 MHz,  $\text{CDCl}_3$ ) (mixture of isomers)  $\delta$  (*Z* isomer) -128.05 – -128.32 (m); (*E* isomer) -130.75 – -131.01 (m).

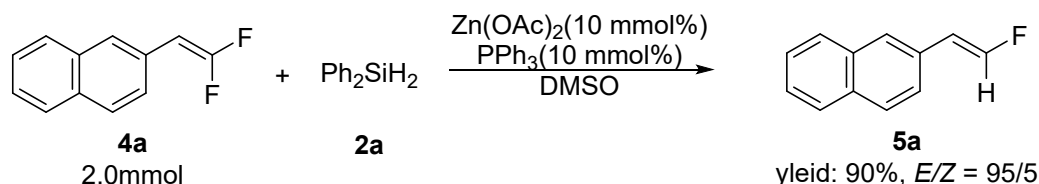

$\text{Zn}(\text{OAc})_2$  (36.7 mg, 0.2 mmol) and  $\text{PPh}_3$  (52.5 mg, 0.2 mmol) in DMSO (20.0 mL) were charged into a 100 mL pressure tube under argon. The mixture was stirred for 30 min at room temperature. Then  $\text{Ph}_2\text{SiH}_2$  (368.6 mg, 2 mmol) and *gem*-difluoroalkene **4a** (380.1 mg, 2 mmol) were added sequentially to the reaction mixture. The reaction tube was then sealed and placed into an oil bath at 50 °C. After stirred for 24 h, the reaction mixture was quenched with  $\text{H}_2\text{O}$  (20.0 mL) and extracted

with dichloromethane. The organic layer was separated dried over  $\text{Na}_2\text{SO}_4$ , concentrated, and purified by silica gel chromatography (PE) to give the monofluoride product **5a** (309.5 mg, yield 90%, *E/Z* 19:1).  $^1\text{H}$  NMR (400 MHz,  $\text{CDCl}_3$ ) (mixture of isomers)  $\delta$  (*E* isomer) 7.84 – 7.75 (m, 3H), 7.65 (s, 1H), 7.53 – 7.16 (m, 4H), 6.56 (dd,  $J = 19.6, 11.2$  Hz, 1H); (*Z* isomer) 6.74 (dd,  $J = 82.8, 5.4$  Hz, 1H), 5.78 (dd,  $J = 44.8, 5.4$  Hz, 1H).  $^{13}\text{C}$  NMR (101 MHz,  $\text{CDCl}_3$ ) (mixture of isomers)  $\delta$  150.6 (d,  $J = 259.3$  Hz), 133.7, 132.9, 130.3 (d,  $J = 11.8$  Hz), 128.6, 127.9, 126.6, 126.1, 125.9 (d,  $J = 5.0$  Hz), 123.5, 114.3 (d,  $J = 16.3$  Hz).  $^{19}\text{F}$  NMR (376 MHz,  $\text{CDCl}_3$ ) (mixture of isomers)  $\delta$  (*Z* isomer) -121.73 (dd,  $J = 82.8, 44.8$  Hz); (*E* isomer) -129.38 (dd,  $J = 83.2, 19.6$  Hz).

### 3.2 Derivatization Reaction.

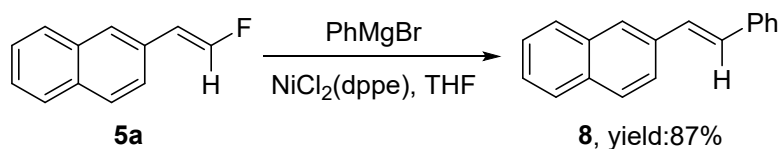

$\text{NiCl}_2(\text{dppe})$  (4.2 mg, 0.008 mmol) in 0.4 mL dry THF were charged into a 25 mL pressure tube under argon, and then the monofluoride **5a** (34.4mg, 0.2mmol) was added. To this mixture was added dropwise a solution of Grignard reagents in THF (0.8 mmol). After stirred for 2 h at room temperature, the reaction mixture was quenched with saturated aqueous solution of  $\text{NH}_4\text{Cl}$  (2.0 ml) and extracted with ethyl acetate. The organic layer was separated dried over  $\text{Na}_2\text{SO}_4$ , concentrated, and purified by silica gel chromatography (PE) to give the product **8** (40.1 mg, yield 87%)<sup>9</sup>.  $^1\text{H}$  NMR (400 MHz,  $\text{CDCl}_3$ )  $\delta$  7.85 – 7.80 (m, 4H), 7.75 – 7.73 (m, 1H), 7.57 – 7.55 (m, 2H), 7.49 – 7.42 (m, 2H), 7.39 – 7.37 (m, 2H), 7.30 – 7.20 (m, 3H).  $^{13}\text{C}$  NMR (101 MHz,  $\text{CDCl}_3$ )  $\delta$  137.5, 135.0, 133.9, 133.2, 129.2, 128.9, 128.9, 128.5, 128.2, 127.8, 127.8, 126.8, 126.7, 126.5, 126.0, 123.7. HRMS (ESI,  $m/z$ ): calcd for  $\text{C}_{18}\text{H}_{15}^+ [\text{M} + \text{H}]^+$ : 231.1168, found 231.1169.

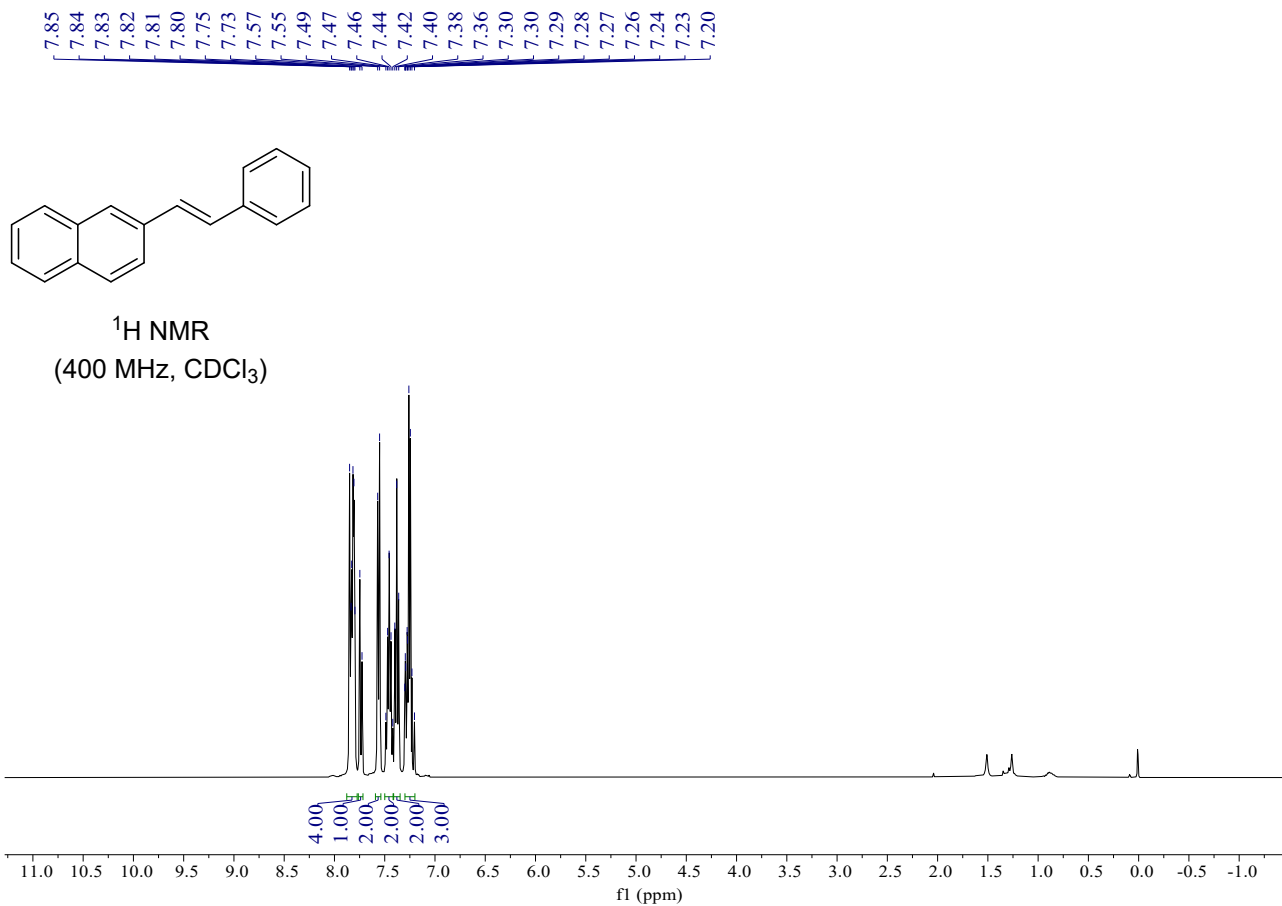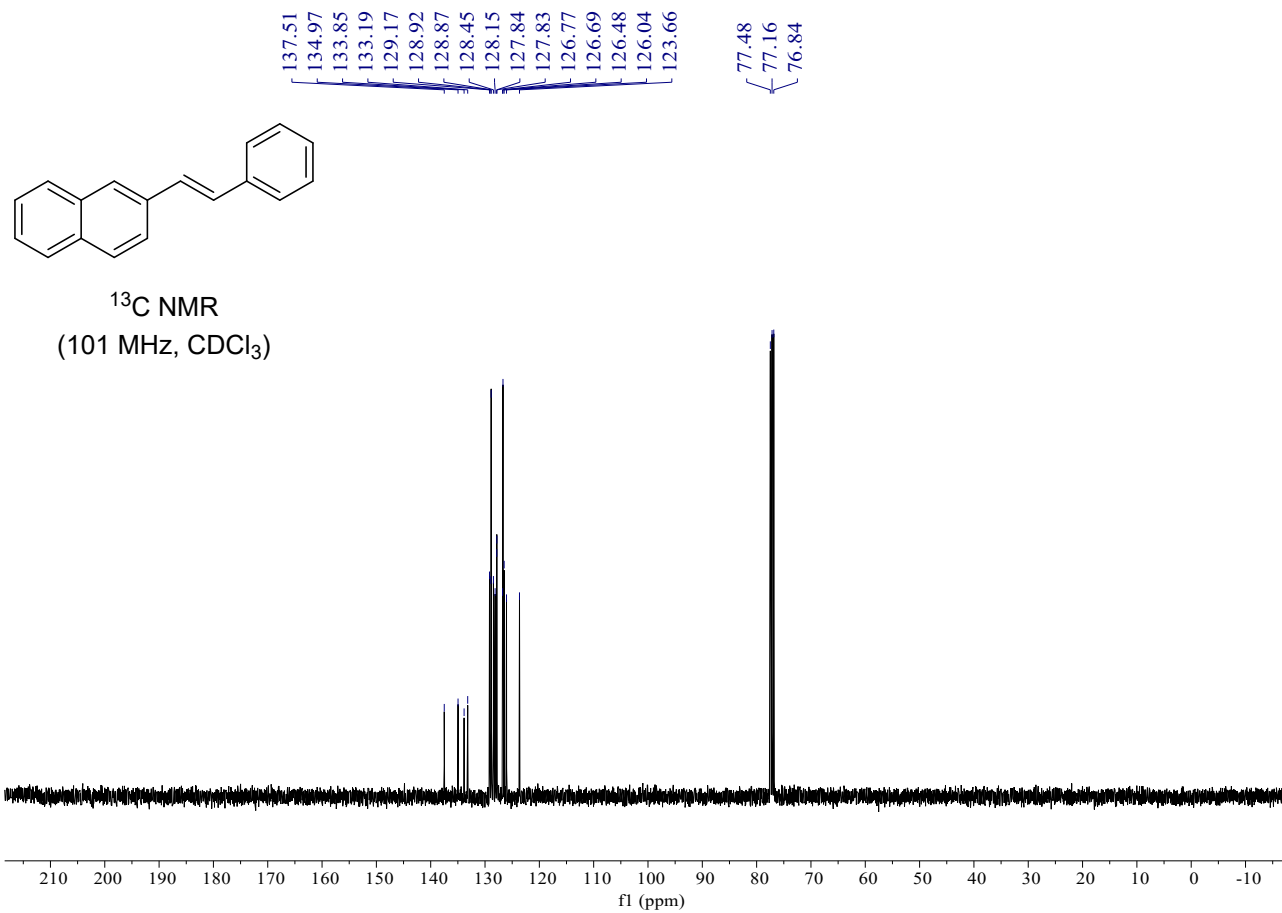

## Mass Spectrum SmartFormula Report

### Analysis Info

Analysis Name D:\LXMS\0306\_BD1\_01\_22073.d  
 Method LC\_NO UV\_P50-1500\_10MIN.m  
 Sample Name 0306

Acquisition D 2023-03-10 17:33:51

Operator Demo User  
 Instrument compact 8255754.2017  
 6

### Comment

### Acquisition Paramet

| Source Type | ESI        | Ion Polarity  | Positive | Set Nebulizer  | 3.0 Bar   |
|-------------|------------|---------------|----------|----------------|-----------|
| Focus       | Not active | Set Capillary | 4000 V   | Set Dry Heater | 200 °C    |
| Scan Begin  | 50 m/z     | Set End Plate | -500 V   | Set Dry Gas    | 8.0 l/min |

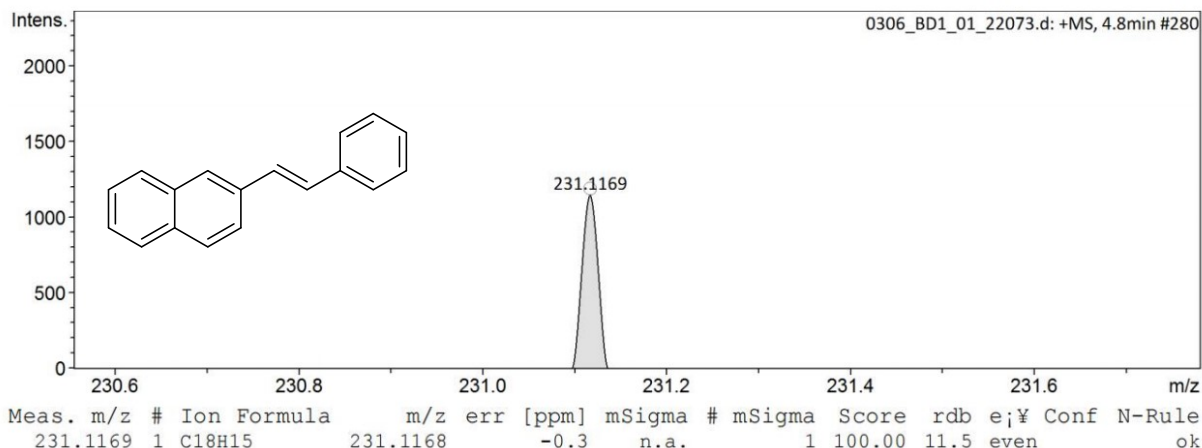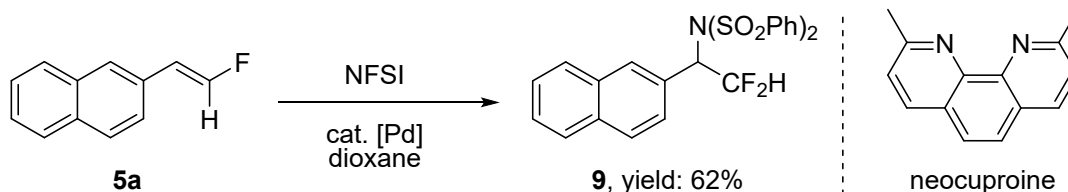

Pd(OAc)<sub>2</sub> (2.3 mg, 0.01 mmol), neocuproine (3.1 mg, 0.015 mmol) and N-fluorobenzenesulfonimide (158 mg, 0.5 mmol) in 1,4-dioxane (1.0 mL) were charged into a 25 mL pressure tube under argon, and then the monofluoride **5a** (34.4mg, 0.2mmol) was added. The reaction tube was then sealed and placed in an oil bath at 50 °C. After stirred for 20 h, the reaction mixture was filtered through a pad of celite, eluted with ethyl acetate, concentrated, and purified by silica gel chromatography (PE : EA = 5:1) to give the indicated product **9** (60.4 mg, yield 62%)<sup>10,11</sup>. <sup>1</sup>H NMR (400 MHz, CDCl<sub>3</sub>) δ 7.89 – 6.87 (m, 18H), 5.93 (dt, *J* = 10.4, 8.0 Hz, 1H). <sup>13</sup>C NMR (101 MHz, CDCl<sub>3</sub>) δ 139.6, 133.9, 133.2, 132.8, 128.9, 128.8, 128.6, 128.5, 127.6, 127.3, 126.8, 126.4, 114.5 (dd, *J* = 246.8, 241.8 Hz), 64.0 (dd, *J* = 35.9, 23.4 Hz). <sup>19</sup>F NMR (376 MHz, CDCl<sub>3</sub>) δ -116.40 (ddd, *J* = 293.0, 57.1, 10.2 Hz, 1F), -124.87 (ddd, *J* = 293.0, 56.4, 8.3 Hz, 1F). HRMS (ESI, m/z): calcd for C<sub>24</sub>H<sub>20</sub>F<sub>2</sub>NO<sub>4</sub>S<sub>2</sub><sup>+</sup> [M + H]<sup>+</sup>: 488.0796, found 488.0773.

7.89  
7.81  
7.81  
7.80  
7.79  
7.79  
7.78  
7.78  
7.65  
7.63  
7.56  
7.55  
7.54  
7.54  
7.53  
7.52  
7.52  
7.47  
7.46  
7.44  
7.44  
7.26  
7.17  
7.15  
7.03  
7.01  
6.89  
6.87  
5.96  
5.94  
5.93  
5.92  
5.92  
5.90

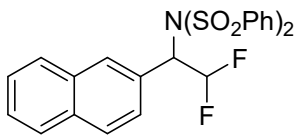

<sup>1</sup>H NMR  
(400 MHz, CDCl<sub>3</sub>)

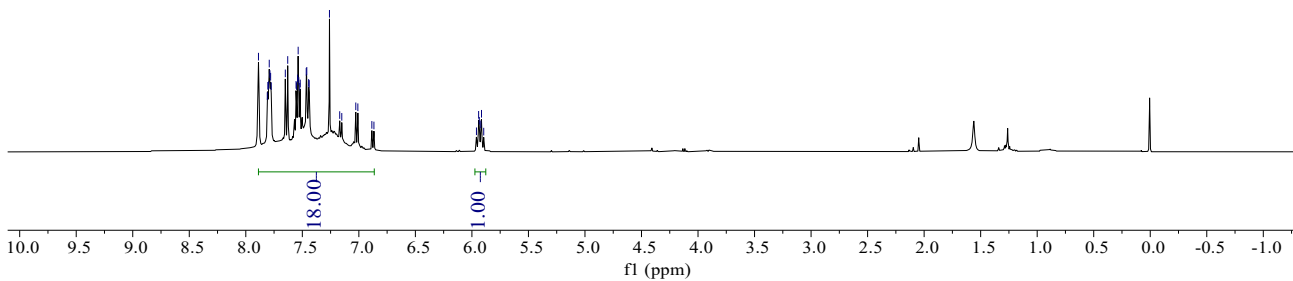

139.58  
133.85  
133.23  
132.79  
128.86  
128.79  
128.58  
128.52  
127.60  
127.31  
126.83  
126.44  
116.96  
114.56  
114.51  
112.11  
77.48  
77.16  
76.84  
64.29  
64.05  
63.93  
63.70

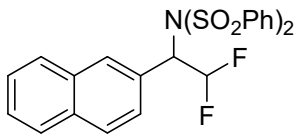

<sup>13</sup>C NMR  
(101 MHz, CDCl<sub>3</sub>)

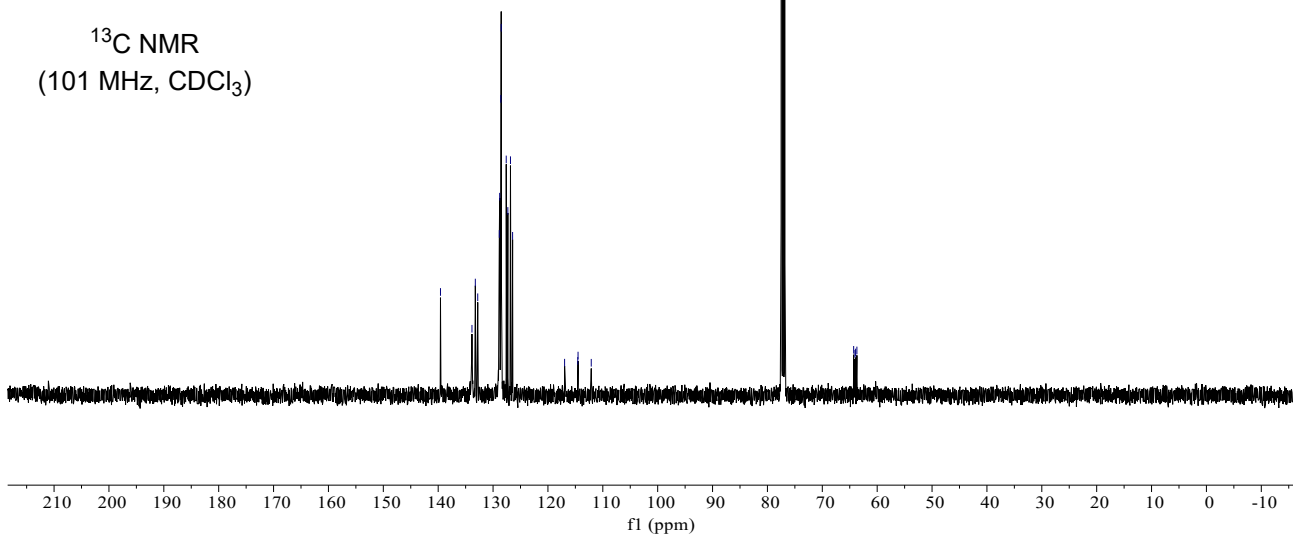



-115.93  
-115.95  
-116.08  
-116.10  
-116.70  
-116.73  
-116.86  
-116.88  
-124.40  
-124.42  
-124.55  
-124.57  
-125.17  
-125.20  
-125.32  
-125.35

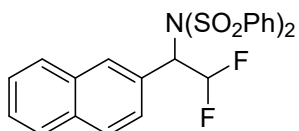

<sup>19</sup>F NMR  
(376 MHz, CDCl<sub>3</sub>)

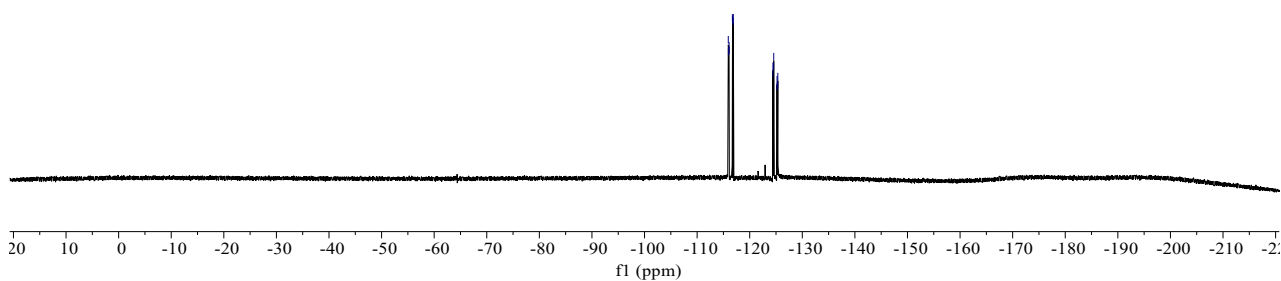

## Mass Spectrum SmartFormula Report

### Analysis Info

Analysis Named: \LXMS\0306\_BD2\_01\_22074.d  
Method LC\_NO UV\_P50-1500\_10MIN.m  
Sample Name 0306

Acquisition D 2023-03-10 17:45:57

Operator Demo User  
Instrument compact 8255754.2017  
6

### Comment

### Acquisition Paramet

| Source Type | ESI        | Ion Polarity  | Positive | Set Nebulizer  | 3.0 Bar   |
|-------------|------------|---------------|----------|----------------|-----------|
| Focus       | Not active | Set Capillary | 4000 V   | Set Dry Heater | 200 °C    |
| Scan Begin  | 50 m/z     | Set End Plate | -500 V   | Set Dry Gas    | 8.0 l/min |

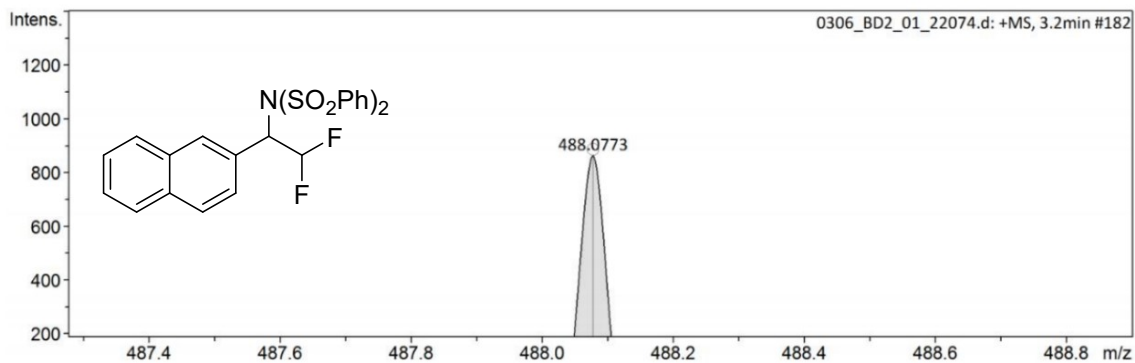

| Meas. m/z | # | Ion Formula   | m/z err [ppm] | mSigma | #     | mSigma | Score  | rdb  | ej   | Conf | N-Rule |
|-----------|---|---------------|---------------|--------|-------|--------|--------|------|------|------|--------|
| 488.0773  | 1 | C24H20F2NO4S2 | 488.0796      | 4.7    | 602.7 | 1      | 100.00 | 14.5 | even |      | ok     |

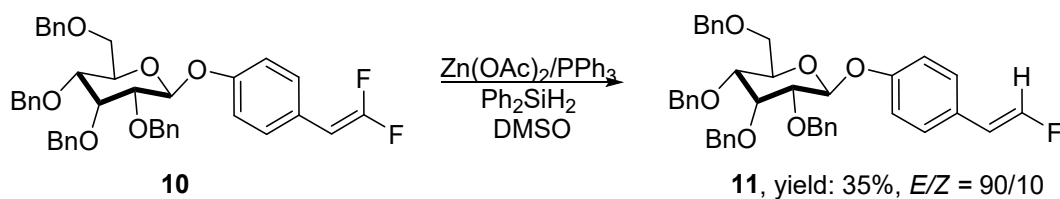

Zn(OAc)<sub>2</sub> (3.7 mg, 0.02 mmol) and PPh<sub>3</sub> (5.3 mg, 0.02 mmol) in DMSO (2.0 mL) were charged into a 25 mL pressure tube under argon. The mixture was stirred for 30 min at room temperature. Then Ph<sub>2</sub>SiH<sub>2</sub> (73.6 mg, 0.4 mmol) and *gem*-difluoroalkene **10** (135.7mg, 0.2 mmol) were added sequentially to the reaction mixture. The reaction tube was then sealed and placed into an oil bath at 100 °C. After stirred for 24 h, the reaction mixture was quenched with H<sub>2</sub>O (2.0 ml) and extracted with dichloromethane. The organic layer was separated dried over Na<sub>2</sub>SO<sub>4</sub>, concentrated, and purified by silica gel chromatography (PE : EA = 10:1) to give the monofluoride product **11** (46.2 mg, yield 35%, *E/Z* = 90/10).

*gem*-difluoroalkene **10**, <sup>1</sup>H NMR (400 MHz, CDCl<sub>3</sub>) δ 7.38 – 7.20 (m, 22H), 7.06 – 7.04 (m, 2H), 5.51 (d, *J* = 7.9 Hz, 1H), 5.20 (dd, *J* = 26.4, 3.8 Hz, 1H), 4.95 – 4.29 (m, 8H), 4.22 (m, 1H), 4.17 (t, *J* = 2.6 Hz, 1H), 3.85 – 3.63 (m, 2H), 3.54 (m, 2H). <sup>13</sup>C NMR (101 MHz, CDCl<sub>3</sub>) δ 156.6 (t, *J* = 2.3 Hz), 156.0 (dd, *J* = 297.1, 286.9 Hz), 139.0, 138.6, 138.4, 137.9, 128.8 (dd, *J* = 6.2, 3.4 Hz), 128.5, 128.5, 128.4, 128.3, 128.1, 127.9, 127.9, 127.8, 127.8, 127.8, 127.6, 127.6, 124.4 (t, *J* = 6.3 Hz), 117.2, 99.3, 81.7 (dd, *J* = 29.3, 14.2 Hz), 78.8, 75.6, 74.8, 74.7, 73.6, 73.2, 72.9, 71.7, 69.2. <sup>19</sup>F NMR (376 MHz, CDCl<sub>3</sub>) δ -84.07 (dd, *J* = 35.4, 26.2 Hz, 1F), -85.86 (dd, *J* = 36.0, 4.1 Hz, 1F). HRMS (ESI, *m/z*): calcd for C<sub>42</sub>H<sub>41</sub>F<sub>2</sub>O<sub>6</sub><sup>+</sup> [*M* + *H*]<sup>+</sup>: 679.2866, found 679.2857.

monofluoride product **11**, <sup>1</sup>H NMR (400 MHz, CDCl<sub>3</sub>) (mixture of isomers) δ (*E* isomer) 7.38 – 7.20 (m, 20H), 7.19 – 6.96 (m, 5H), 6.35 (dd, *J* = 19.2, 11.2 Hz, 1H), 5.49 (d, *J* = 7.9 Hz, 1H), 4.94 – 4.36 (m, 8H), 4.22 (m, 1H), 4.18 (t, *J* = 2.6 Hz, 1H), 3.89 – 3.63 (m, 2H), 3.61 – 3.49 (m, 2H); (*Z* isomer) 6.60 (dd, *J* = 82.8, 5.2 Hz, 1H). <sup>13</sup>C NMR (151 MHz, CDCl<sub>3</sub>) (mixture of isomers) δ 157.2, 149.4 (d, *J* = 256.8 Hz), 139.0, 138.6, 138.5, 137.9, 128.6, 128.5, 128.4, 128.3, 128.1, 128.0, 127.9, 127.9, 127.8, 127.8, 127.6, 127.6, 127.3 (d, *J* = 3.1 Hz), 126.8 (d, *J* = 12.1 Hz), 117.3, 113.5 (d, *J* = 15.6 Hz), 99.3, 78.8, 75.6, 74.9, 74.7, 73.6, 73.2, 72.9, 71.8, 69.3. <sup>19</sup>F NMR (376 MHz, CDCl<sub>3</sub>) (mixture of isomers) δ (*Z* isomer) -124.68 (dd, *J* = 82.8, 45.7 Hz); (*E* isomer) -132.03 (dd, *J* = 84.0, 19.2 Hz). HRMS (ESI, *m/z*): calcd for C<sub>42</sub>H<sub>42</sub>FO<sub>6</sub><sup>+</sup> [*M* + *H*]<sup>+</sup>: 661.2960, found 679.2955.

7.38  
7.37  
7.37  
7.36  
7.35  
7.35  
7.34  
7.32  
7.31  
7.30  
7.29  
7.29  
7.28  
7.28  
7.27  
7.26  
7.26  
7.25  
7.25  
7.24  
7.24  
7.24  
7.24  
7.23  
7.23  
7.22  
7.20  
7.06  
7.05  
7.04  
5.52  
5.50  
4.92  
4.90  
4.89  
4.87  
4.82  
4.79  
4.73  
4.70  
4.60  
4.57  
4.51  
4.48  
4.40  
4.38  
4.17  
3.79  
3.79  
3.54  
3.53

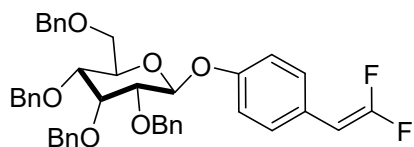

<sup>1</sup>H NMR  
(400 MHz, CDCl<sub>3</sub>)

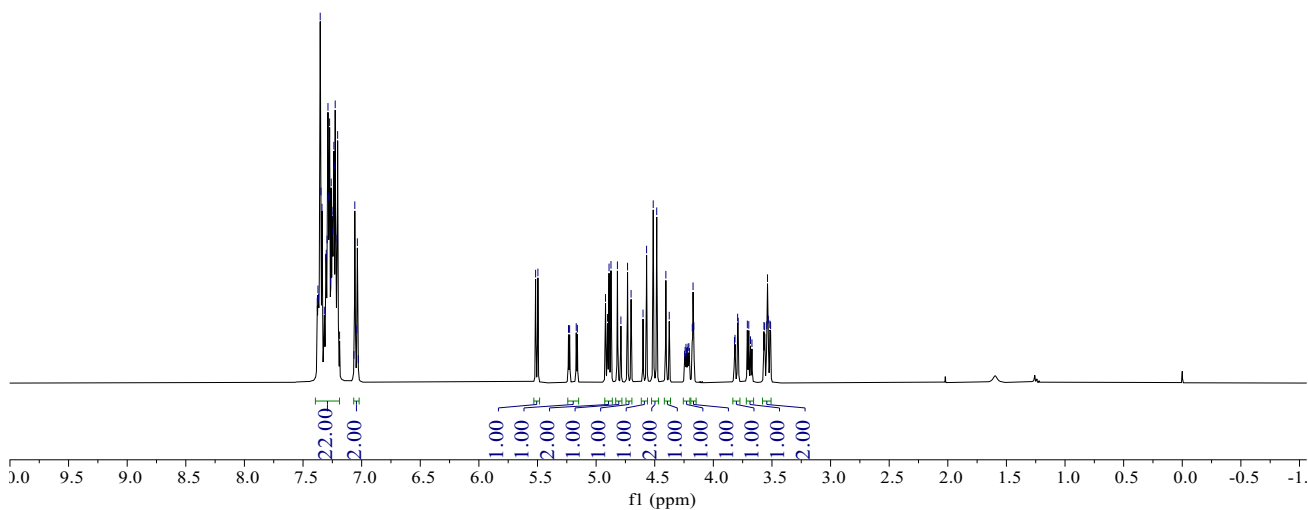

158.91  
156.61  
156.59  
156.57  
156.06  
155.96  
153.10  
138.95  
138.57  
138.43  
137.89  
128.84  
128.81  
128.78  
128.75  
128.52  
128.50  
128.38  
128.29  
128.08  
127.92  
127.88  
127.83  
127.80  
127.77  
127.60  
127.55  
124.44  
124.37  
124.31  
117.18  
99.30  
77.48  
77.16  
76.84  
73.24  
72.86  
71.73  
69.23

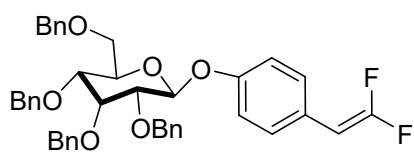

<sup>13</sup>C NMR  
(101 MHz, CDCl<sub>3</sub>)

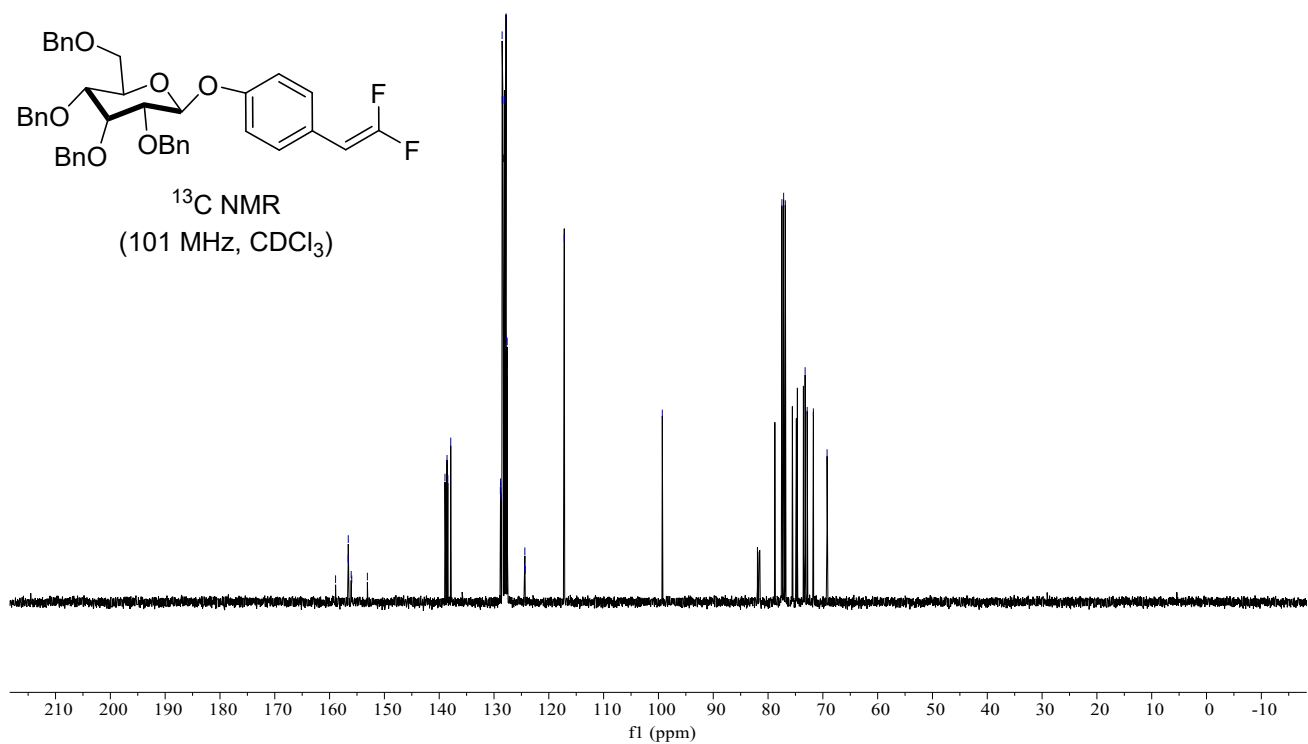

-83.99  
-84.06  
-84.08  
-84.15  
-85.81  
-85.82  
-85.90  
-85.92

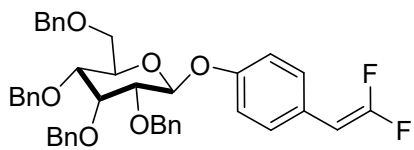

<sup>19</sup>F NMR  
(376 MHz, CDCl<sub>3</sub>)

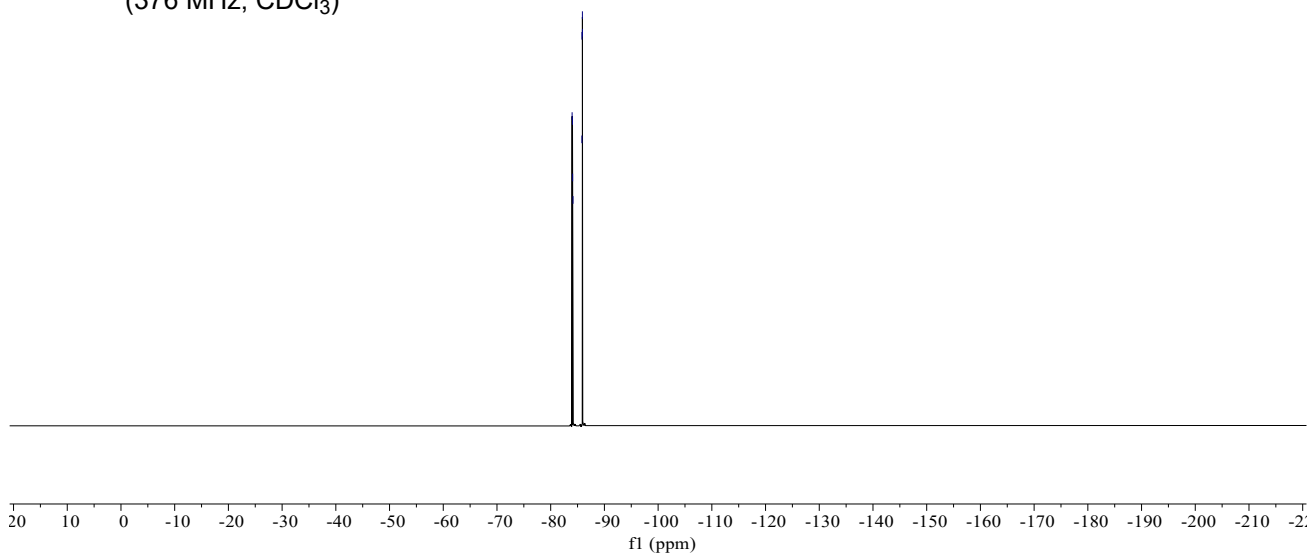

lx-94 #95 RT: 0.71 AV: 1 NL: 2.53E5  
T: FTMS + p ESI Full ms [100.0000-1500.0000]

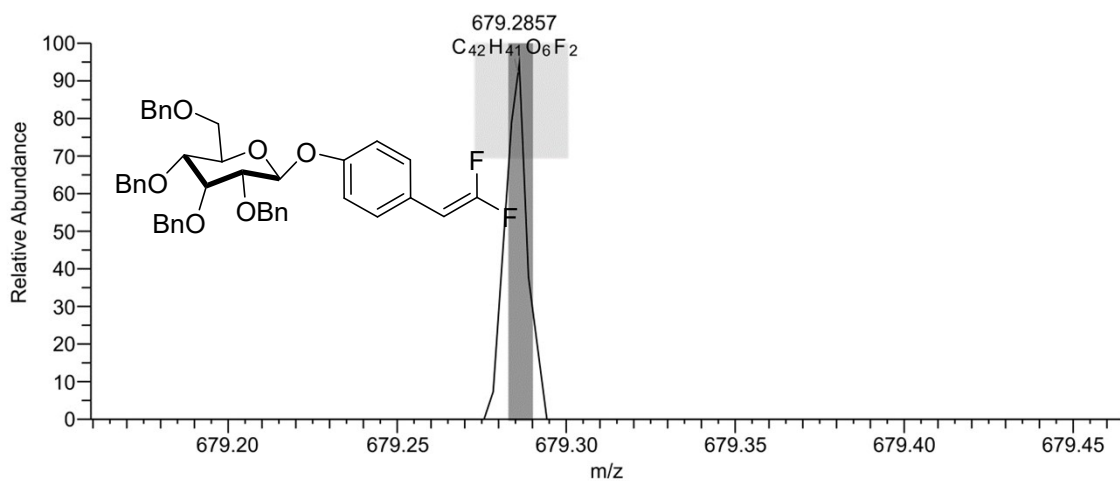

| Peak M... | Display...                                                    | S Fit                    | RDB   | Delta [p... | Theo....  | Rank | Combin... | # Matc... | # Misse... | MS Cov... | Pattern... | MSMS...       |
|-----------|---------------------------------------------------------------|--------------------------|-------|-------------|-----------|------|-----------|-----------|------------|-----------|------------|---------------|
| 679.2857  | C <sub>42</sub> H <sub>41</sub> O <sub>6</sub> F <sub>2</sub> | 28.1485<br>732208<br>024 | 21.50 | -1.28       | 679.28657 | 1    | 96.22     | 1         | 1          | 100       | 68.76      | (Collect ion) |

7.38  
7.37  
7.36  
7.35  
7.35  
7.33  
7.33  
7.32  
7.31  
7.30  
7.30  
7.29  
7.29  
7.28  
7.28  
7.27  
7.27  
7.27  
7.26  
7.25  
7.25  
7.24  
7.23  
7.23  
7.22  
7.21  
7.21  
7.21  
7.15  
7.13  
7.03  
7.01  
5.50  
5.48  
4.92  
4.90  
4.89  
4.88  
4.82  
4.74  
4.71  
4.61  
4.58  
4.52  
4.49  
4.42  
4.39  
4.18  
3.80  
3.54

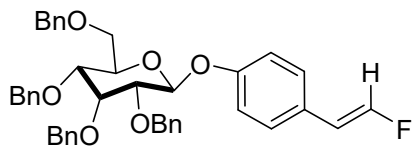

$^1\text{H NMR}$   
(400 MHz,  $\text{CDCl}_3$ )

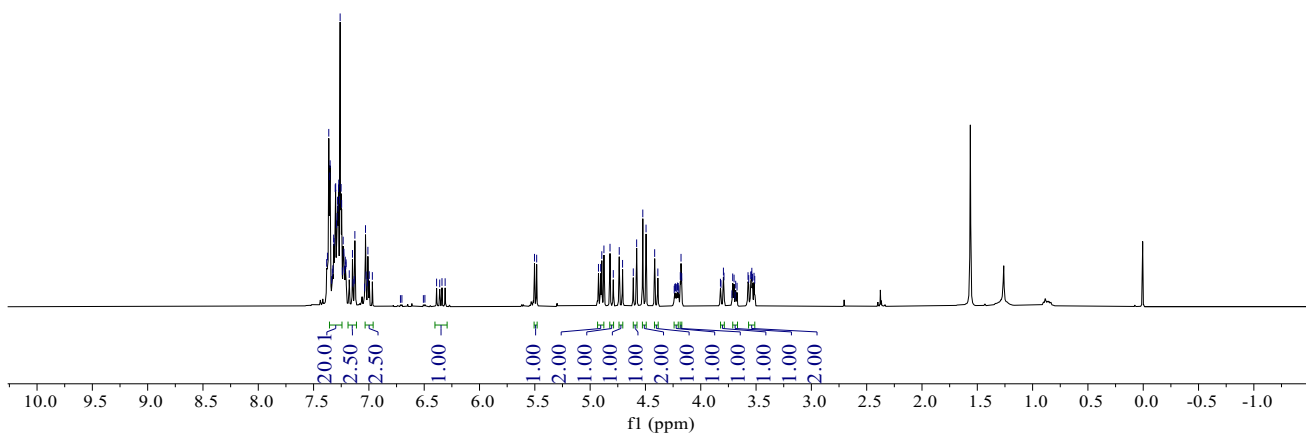

157.16  
150.26  
148.56  
138.98  
138.61  
138.48  
137.92  
128.55  
128.52  
128.42  
128.32  
128.10  
127.95  
127.91  
127.85  
127.83  
127.79  
127.62  
127.58  
127.34  
127.32  
126.81  
117.32  
113.51  
113.41  
99.34  
78.80  
77.37  
77.16  
76.95  
75.59  
74.88  
74.68  
73.58  
73.27  
72.90  
71.77  
69.76

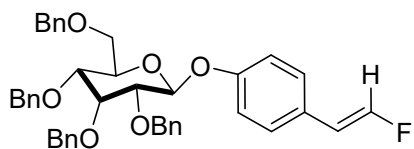

$^{13}\text{C NMR}$   
(151 MHz,  $\text{CDCl}_3$ )

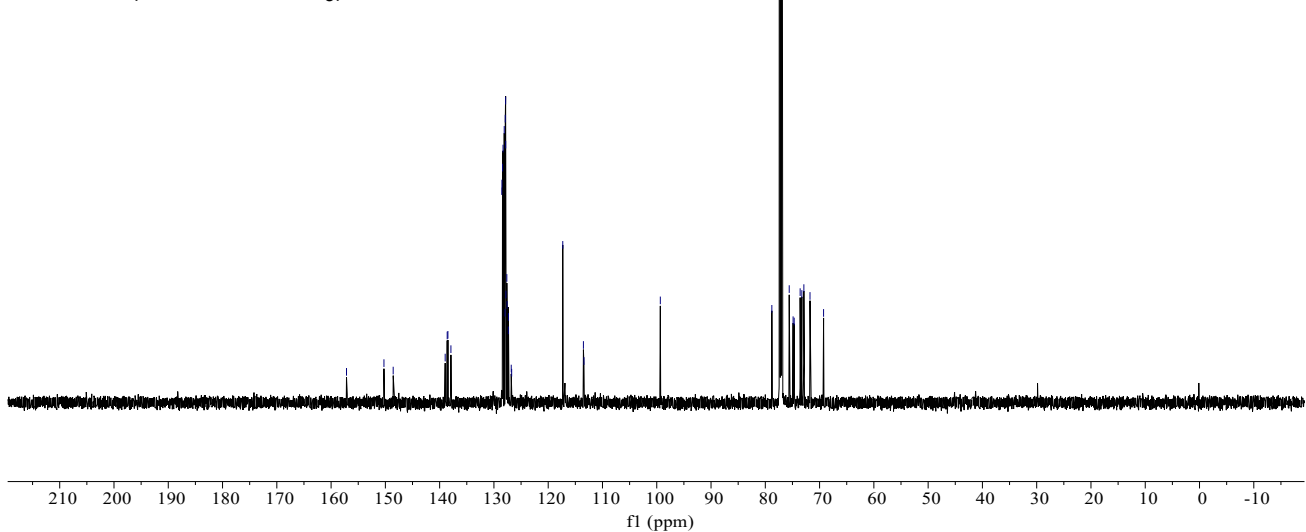

-124.51  
-124.63  
-124.73  
-124.85  
-131.89  
-131.94  
-132.11  
-132.16

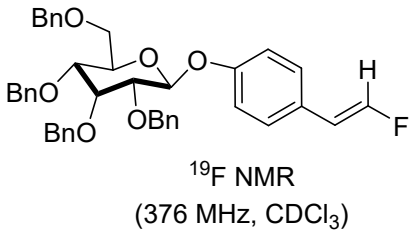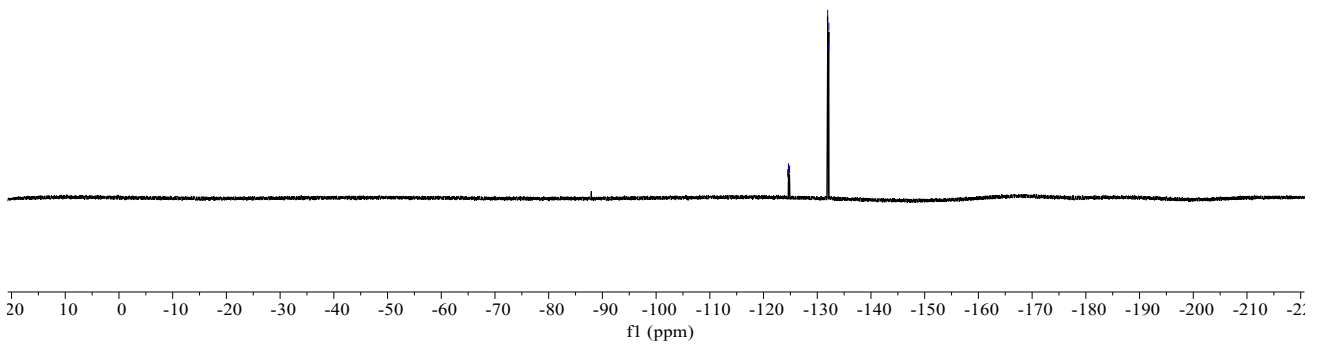

ix-93 #71 RT: 0.53 AV: 1 NL: 8.93E4  
T: FTMS + p ESI Full ms [100.0000-1500.0000]

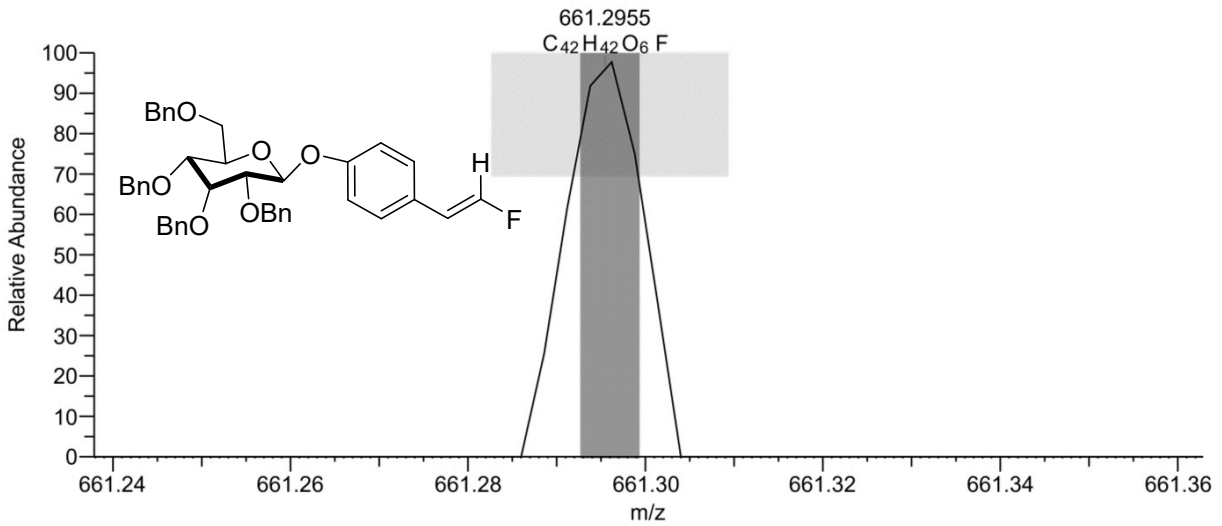

| Peak M...    | Display...                                     | S Fit                    | RDB   | Delta [p... | Theo...       | Rank | Combin... | # Matc... | # Misse... | MS Cov... | Pattern... | MSMS...          |
|--------------|------------------------------------------------|--------------------------|-------|-------------|---------------|------|-----------|-----------|------------|-----------|------------|------------------|
| 661.295<br>5 | $\text{C}_{42}\text{H}_{42}\text{O}_6\text{F}$ | 28.9458<br>763056<br>176 | 21.50 | -0.70       | 661.295<br>99 | 1    | 96.26     | 1         | 1          | 100       | 68.77      | (Collect<br>ion) |



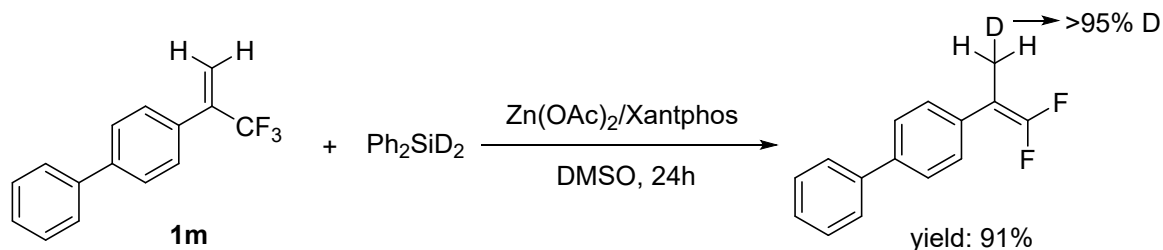

$\text{Zn(OAc)}_2$  (3.7 mg, 0.02 mmol) and Xantphos (11.6 mg, 0.02 mmol) in DMSO (2.0 mL) were charged into a 25 mL pressure tube under argon. The mixture was stirred for 30 min at room temperature. Then  $\text{Ph}_2\text{SiD}_2$  (111.8 mg, 0.6 mmol) and trifluoromethyl alkene **1m** (0.2 mmol, 49.6 mg) were added sequentially to the reaction mixture. The reaction tube was then sealed and placed into an oil bath at 120 °C. After stirred for 24 h, the reaction mixture was quenched with  $\text{H}_2\text{O}$  (2.0 mL) and extracted with dichloromethane. The organic layer was separated dried over  $\text{Na}_2\text{SO}_4$ , concentrated, and purified by silica gel chromatography (PE) to give the monofluoride product (42.1mg, 91% yield).  $^1\text{H}$  NMR (400 MHz,  $\text{CDCl}_3$ )  $\delta$  7.64 – 7.61 (m, 4H), 7.49 – 7.45 (m, 4H), 7.39 – 7.37 (m, 1H), 2.04 – 2.01 (m, 2H).  $^{13}\text{C}$  NMR (101 MHz,  $\text{CDCl}_3$ )  $\delta$  153.73 (dd,  $J = 290.4, 286.6$  Hz), 140.72, 139.99, 133.95 (t,  $J = 4.1$  Hz), 128.95, 127.96 (dd,  $J = 4.9, 3.4$  Hz), 127.53, 127.16 (d,  $J = 3.1$  Hz), 87.31 (dd,  $J = 22.6, 13.9$  Hz), 13.21 – 12.81 (m).  $^{19}\text{F}$  NMR (376 MHz,  $\text{CDCl}_3$ )  $\delta$  -89.68 – -90.15 (m).



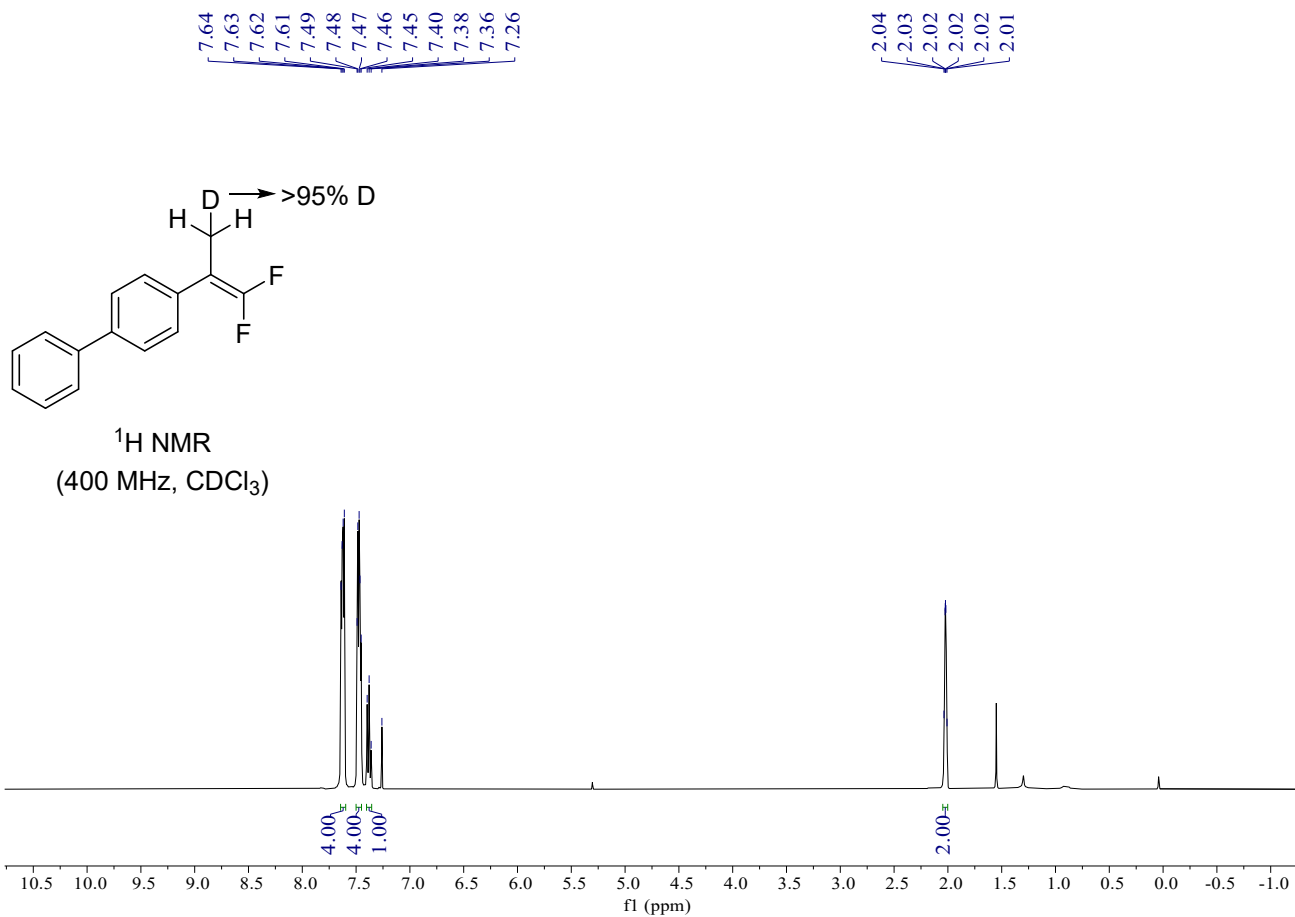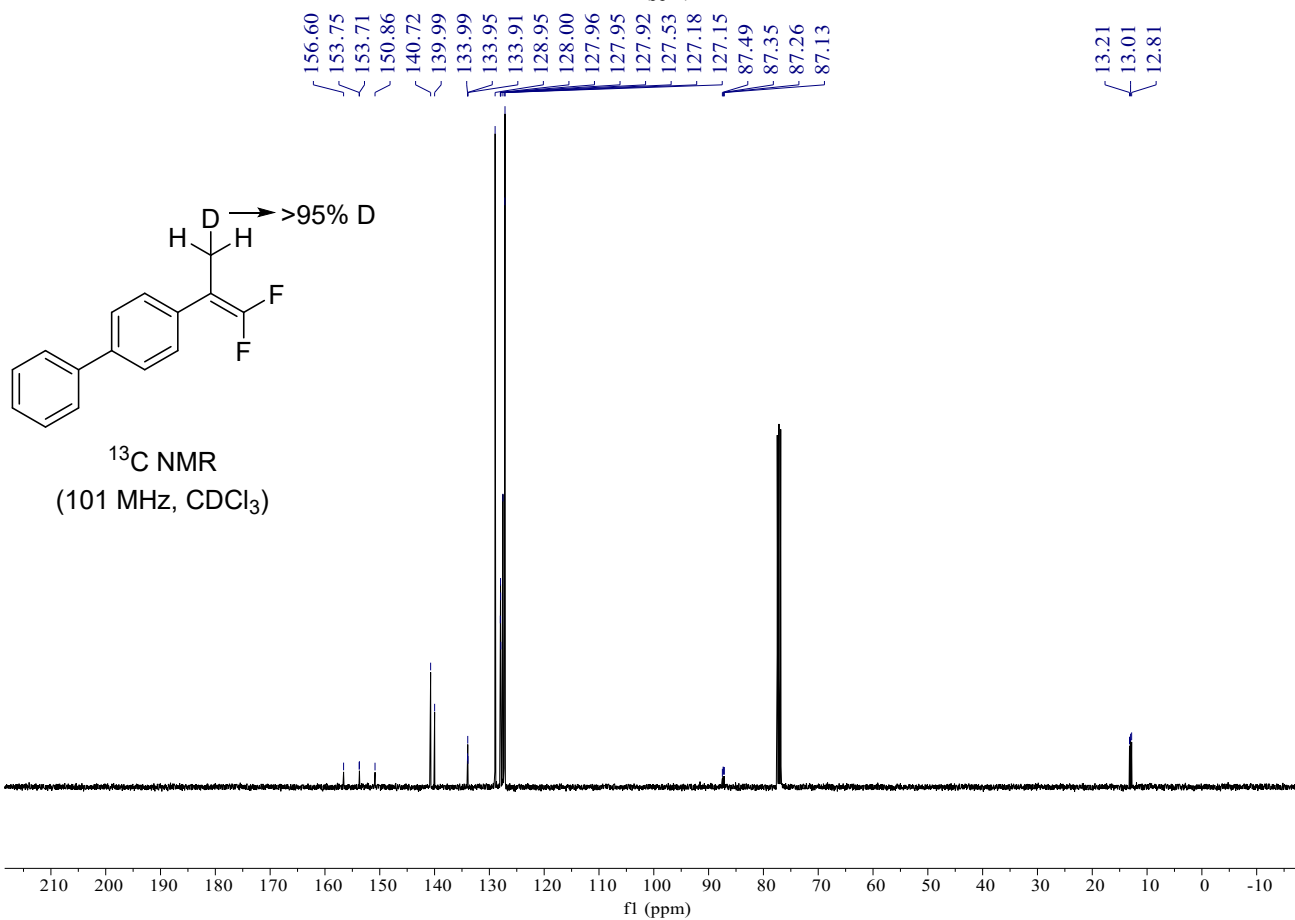

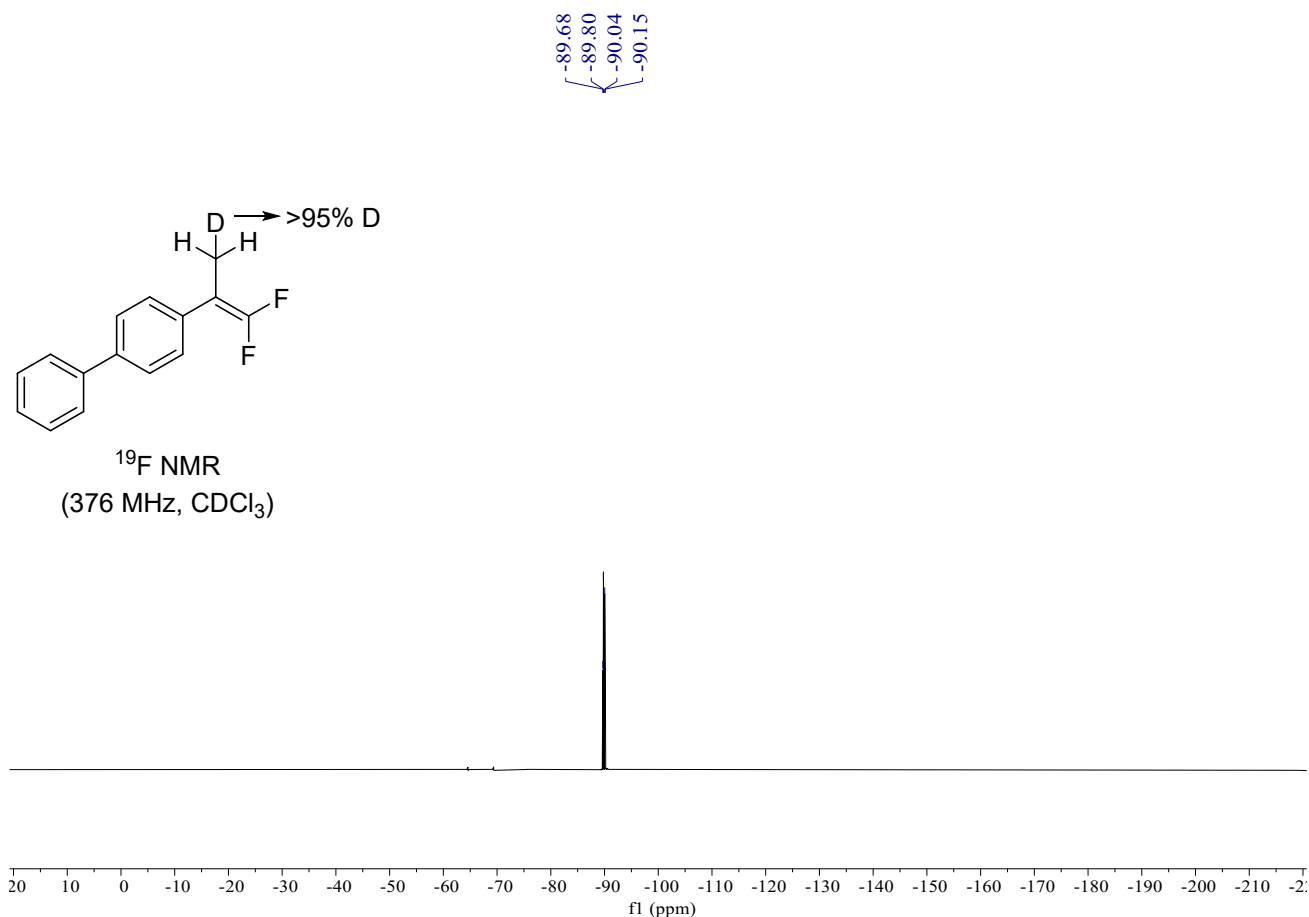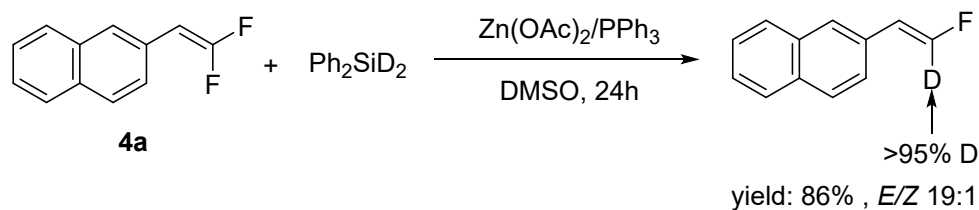

$\text{Zn(OAc)}_2$  (3.7 mg, 0.02 mmol) and  $\text{PPh}_3$  (5.3 mg, 0.02 mmol) in DMSO (2.0 mL) were charged into a 25 mL pressure tube under argon. The mixture was stirred for 30 min at room temperature. Then  $\text{Ph}_2\text{SiD}_2$  (37.2 mg, 0.2 mmol) and *gem*-difluoroalkene **4a** (38.0 mg, 0.2 mmol) were added sequentially to the reaction mixture. The reaction tube was then sealed and placed into an oil bath at 50 °C. After stirred for 24 h, the reaction mixture was quenched with  $\text{H}_2\text{O}$  (2.0 mL) and extracted with dichloromethane. The organic layer was separated dried over  $\text{Na}_2\text{SO}_4$ , concentrated, and purified by silica gel chromatography (PE) to give the monofluoride product (29.8mg, 86% yield, *E/Z* 19:1).  $^1\text{H}$  NMR (400 MHz,  $\text{CDCl}_3$ ) (mixture of isomers)  $\delta$  (*E* isomer) 7.82 – 7.78 (m, 3H), 7.66 (s, 1H), 7.51 – 7.44 (m, 2H), 7.40 (dd,  $J = 8.4, 1.6$  Hz, 1H), 6.56 (d,  $J = 19.6$  Hz, 1H); (*Z* isomer) 5.78 (d,  $J = 44.7$  Hz, 1H).  $^{13}\text{C}$  NMR (101 MHz,  $\text{CDCl}_3$ ) (mixture of isomers)  $\delta$  133.7, 132.9, 130.3 (d,

$J = 11.7$  Hz), 128.6, 127.9 (d,  $J = 1.9$  Hz), 126.6, 126.1, 125.9 (d,  $J = 5.0$  Hz), 123.5, 114.1 (d,  $J = 16.5$  Hz).  $^{19}\text{F}$  NMR (376 MHz,  $\text{CDCl}_3$ ) (mixture of isomers)  $\delta$  (*Z* isomer) -122.31 (dt,  $J = 44.5, 12.6$  Hz); (*E* isomer) -129.85 – -129.97 (m).

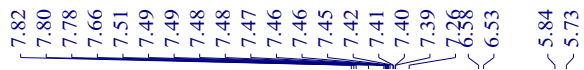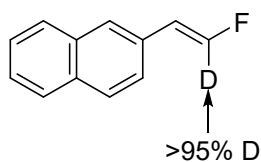

$^1\text{H}$  NMR  
(400 MHz,  $\text{CDCl}_3$ )

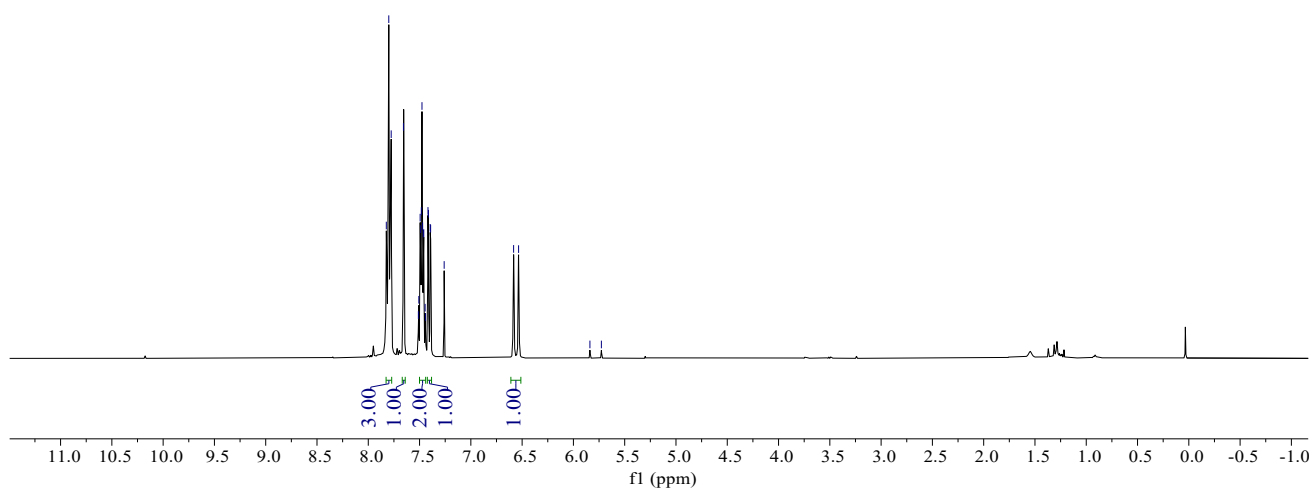

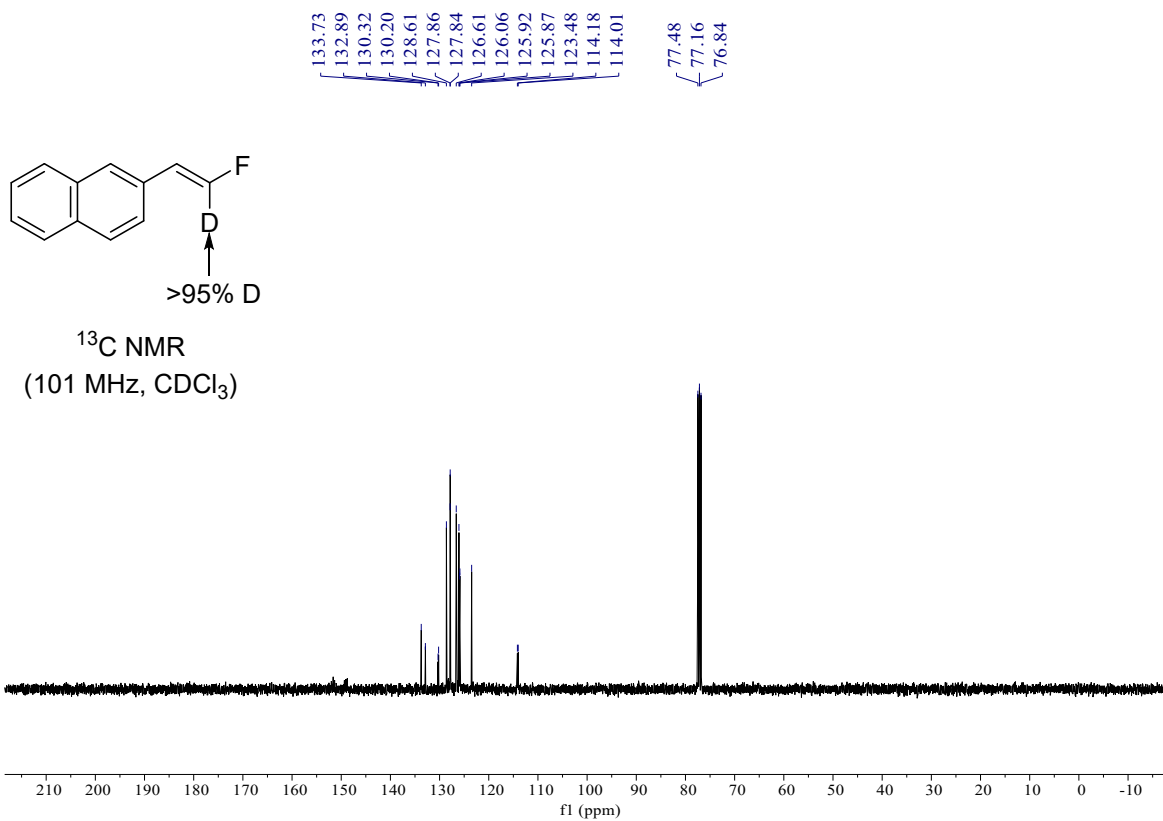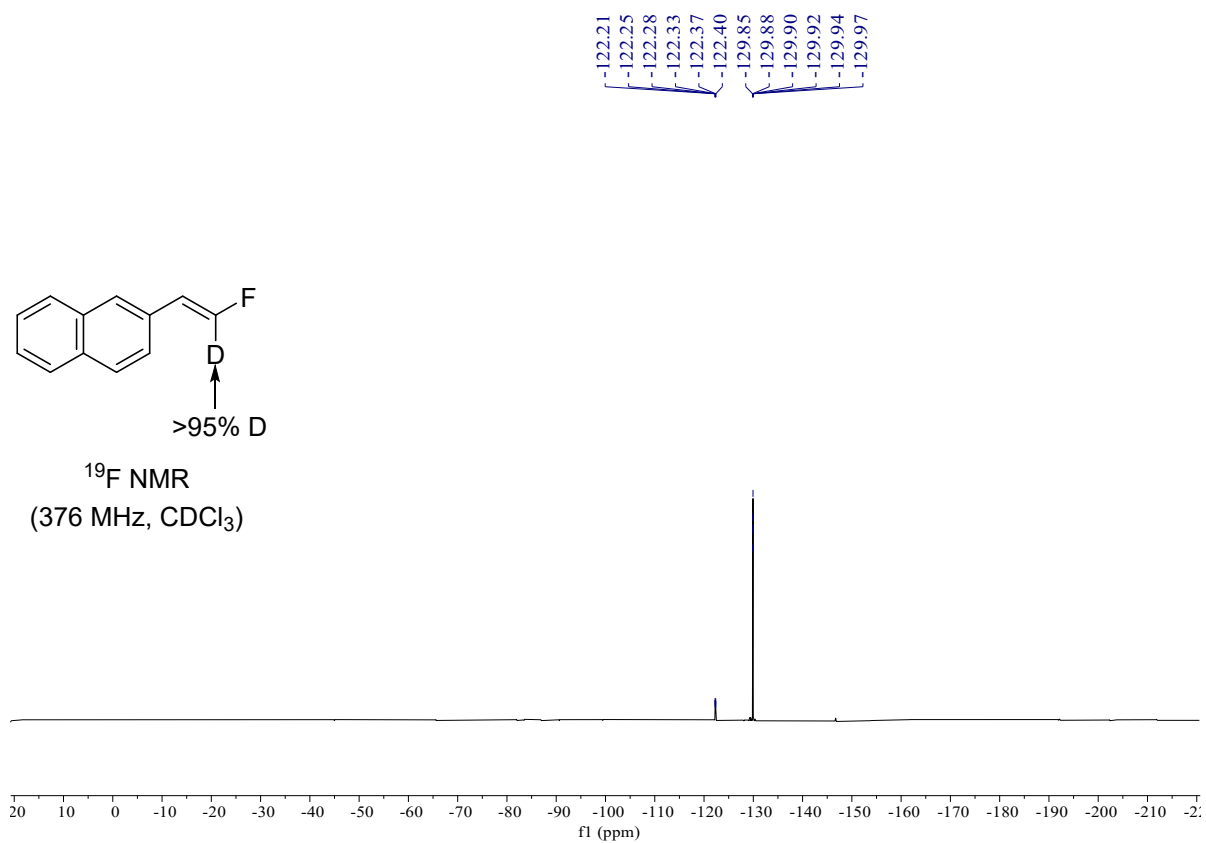

## 5. Supplementary References

- (1) Liu, H. D.; Ge, L.; Wang, D. X.; Chen, N.; Feng, C. Photoredox-Coupled F-Nucleophilic Addition: Allylation of gem-Difluoroalkenes. *Angew. Chem. Int. Ed.* **2019**, *58*, 3918-3922.
- (2) Zhao, Y. C.; Huang, W. Z.; Zhu, L. G.; Hu, J. B. Difluoromethyl 2-Pyridyl Sulfone: A New gem-Difluoroolefination Reagent for Aldehydes and Ketones. *Org. Lett.* **2010**, *12*, 1444–1447.
- (3) Yao, C. B.; Wang, S.; Norton, J.; Hammond, M. Catalyzing the Hydrodefluorination of CF<sub>3</sub>-Substituted Alkenes by PhSiH<sub>3</sub>·H• Transfer from a Nickel Hydride. *J. Am. Chem. Soc.* **2020**, *142*, 4793–4799.
- (4) Engman, M.; Cheruku, P.; Tolstoy, P.; Bergquist, J.; Völker, S. F.; Andersson, P. G. Highly Selective Iridium-Catalyzed Asymmetric Hydrogenation of Trifluoromethyl Olefins: A New Route to Trifluoromethyl- Bearing Stereocenters. *Adv. Synth. Catal.* **2009**, *351*, 375-378.
- (5) Zhang, J. J.; Yang, J. D.; Cheng, J. P. Chemoselective catalytic hydrodefluorination of trifluoromethylalkenes towards mono-/gem-di-fluoroalkenes under metal-free conditions. *Nat. Commun.* **2021**, *12*, 2835-2844.
- (6) Zhang, H.; Zhou, C. Bing.; Chen, Q. Y.; Xiao, J. C.; Ran, H. Monofluorovinyl Tosylate: A Useful Building Block for the Synthesis of Terminal Vinyl Monofluorides via Suzuki–Miyaura Coupling. *Org. Lett.* **2011**, *13*, 560–563.
- (7) Schoch, T. D.; Mondal, M.; Weaver, J. D. Catalyst-Free Hydrodefluorination of Perfluoroarenes with NaBH<sub>4</sub>. Catalyst-Free Hydrodefluorination of Perfluoroarenes with NaBH<sub>4</sub>. *Org. Lett.* **2021**, *23*, 1588–1593.
- (8) Matsunami, A.; Kuwata, S.; and Kayaki, Y. Hydrodefluorination of Fluoroarenes Using Hydrogen Transfer Catalysts with a Bifunctional Iridium/NH Moiety. *ACS Catal.* **2016**, *6*, 5181–5185.
- (9) Shi, H. Y. ; Dai, W. P.; Wang, B. Y.; Cao, S. Copper- and Nickel-Catalyzed Cross-Coupling Reaction of Monofluoroalkenes with Tertiary, Secondary, and Primary Alkyl and Aryl Grignard Reagents. *Organometallics* **2018**, *37*, 459–463.
- (10) Qiu, S. F.; Xu, T.; Zhou, J.; Guo, Y. L.; Liu, G. S. Palladium-Catalyzed Intermolecular Aminofluorination of Styrenes. *J. Am. Chem. Soc.* **2010**, *132*, 2856–2857.
- (11) Wu, F.; Li, X.; Chang, J. B.; Bai, D. C. Palladium-catalyzed multi components oxy-aminofluorination and aminofluorination of gem-difluoroalkenes. *Chin. Chem. Lett.* DOI:

10.1016/j.ccllet.2023.109155.

## 6. NMR Spectra and HRMS Report

7.84  
7.83  
7.81  
7.79  
7.74  
7.74  
7.49  
7.49  
7.48  
7.48  
7.47  
7.46  
7.46  
7.44  
7.44  
7.26  
7.17  
7.17  
7.17  
7.16  
6.96  
6.96  
6.95  
6.95

2.16  
2.16  
2.15  
2.15

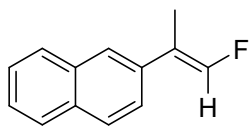

3a (from trifluoromethyl alkene),  
 $^1\text{H}$  NMR (400 MHz,  $\text{CDCl}_3$ )

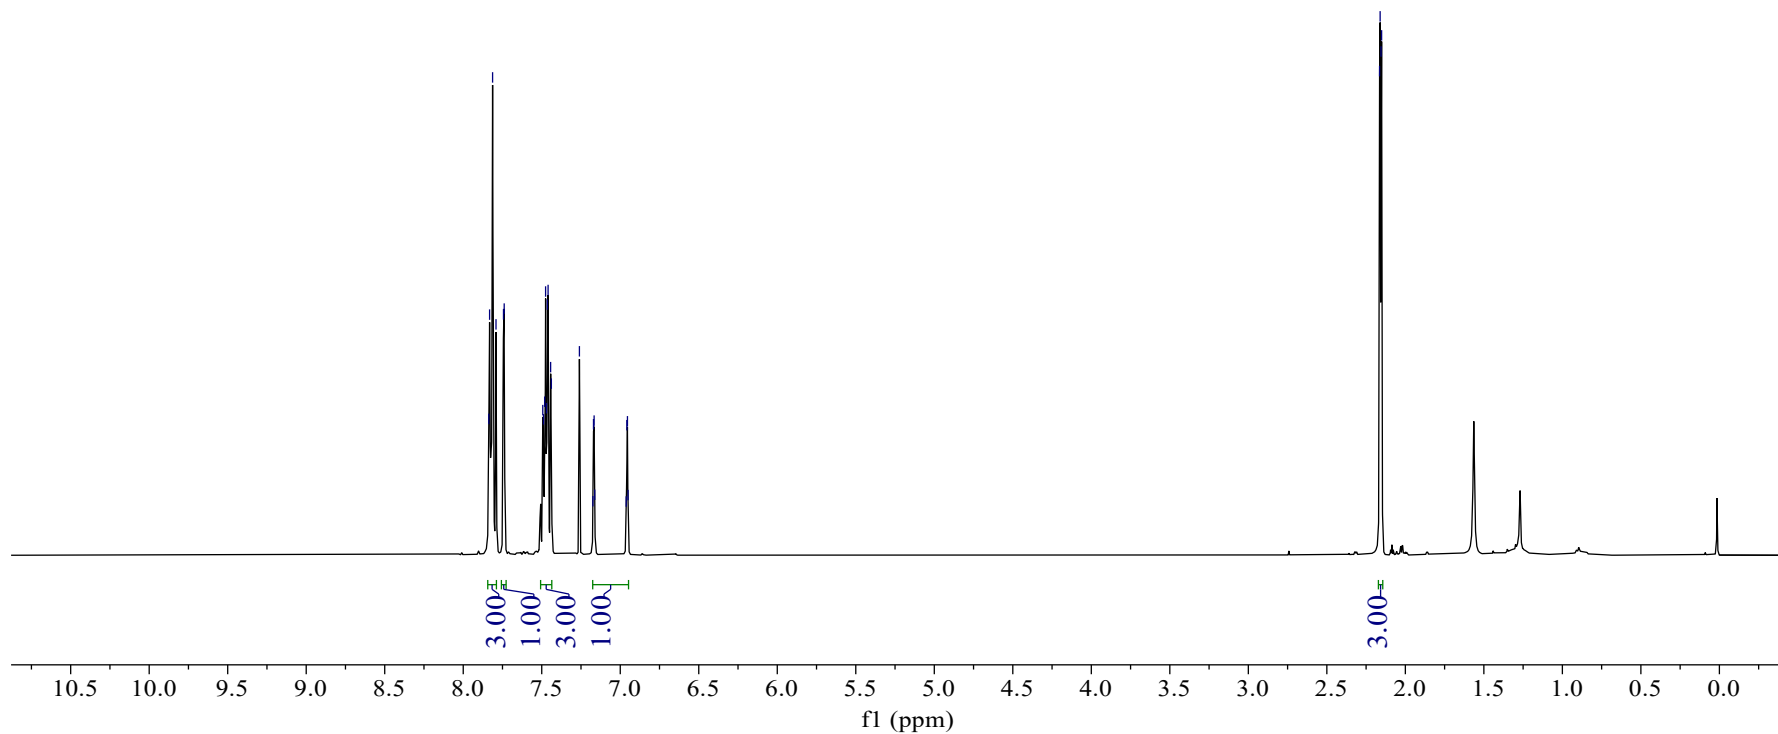

LX-19 #23 RT: 0.17 AV: 1 NL: 5.73E6  
 T: FTMS + p ESI Full ms [100.0000-1500.0000]

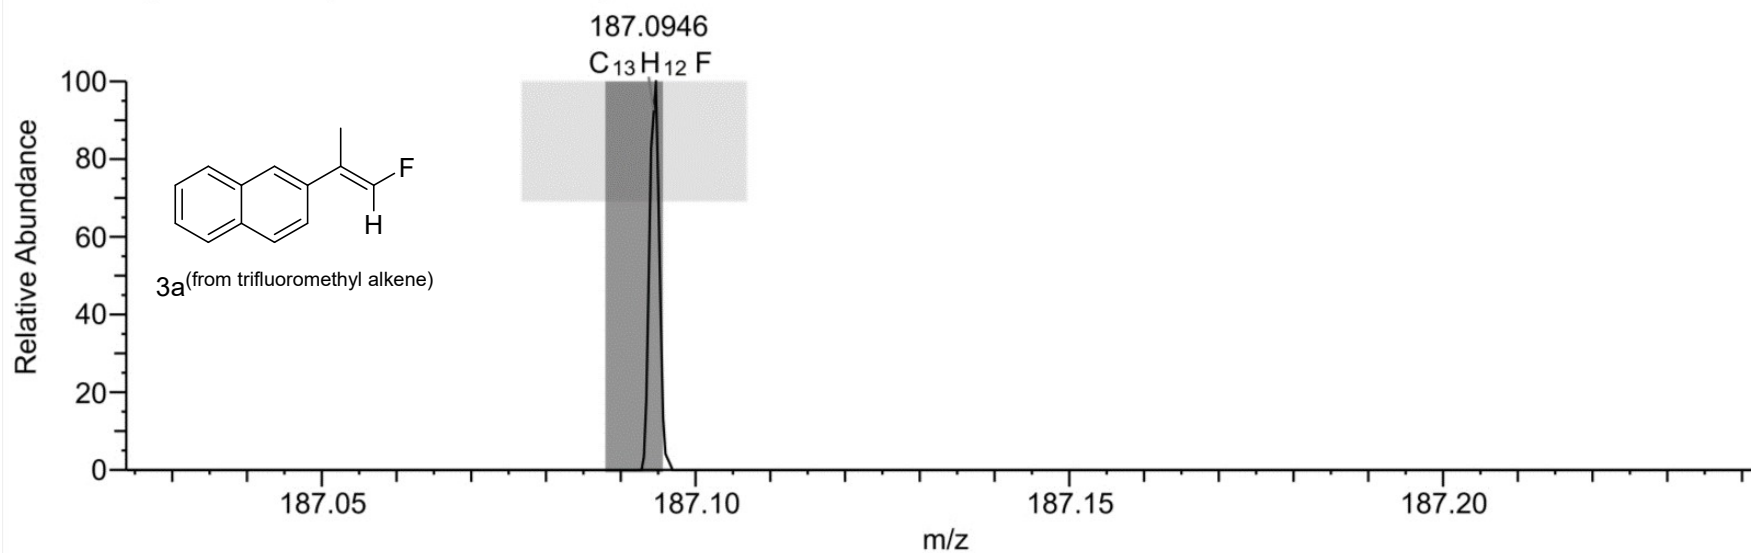

| Peak M...    | Display...      | S Fit                    | RDB  | Delta [p... | Theo....      | Rank | Combin... | # Matc... | # Misse... | MS Cov... | Pattern... | MSMS...          |
|--------------|-----------------|--------------------------|------|-------------|---------------|------|-----------|-----------|------------|-----------|------------|------------------|
| 187.094<br>6 | $C_{13}H_{12}F$ | 19.5935<br>525710<br>216 | 7.50 | 15.31       | 187.091<br>76 | 1    | 95.77     | 1         | 1          | 100       | 87.68      | (Collect<br>ion) |



7.84  
7.82  
7.80  
7.75  
7.50  
7.49  
7.49  
7.48  
7.47  
7.47  
7.46  
7.45  
7.44  
7.26  
7.18  
7.17  
7.17  
7.17  
6.97  
6.96  
6.96  
6.96

2.17  
2.17  
2.16  
2.16

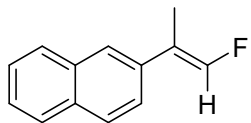

3a (from gem-difluoroalkene),  
<sup>1</sup>H NMR (400 MHz, CDCl<sub>3</sub>)

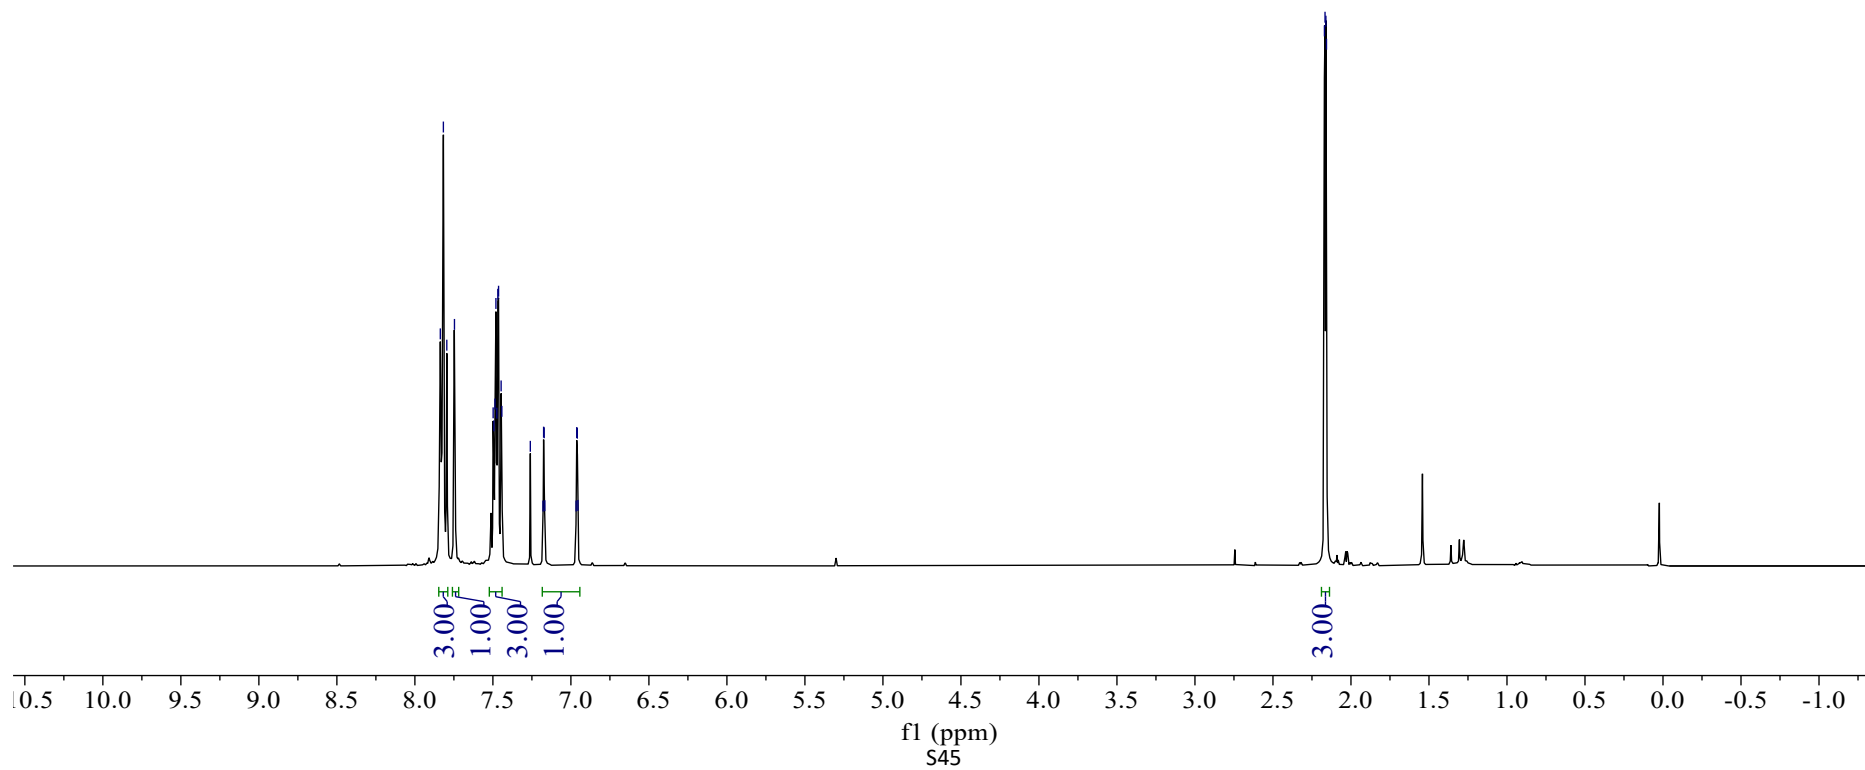

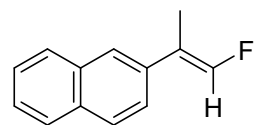

3a (from gem-difluoroalkene),  
<sup>13</sup>C NMR (101 MHz, CDCl<sub>3</sub>)

147.91  
145.34  
135.04  
134.95  
133.60  
132.84  
128.28  
128.05  
127.73  
126.48  
126.02  
124.75  
124.71  
124.08  
124.06  
120.22  
77.48  
77.16  
76.84  
  
12.35  
12.28

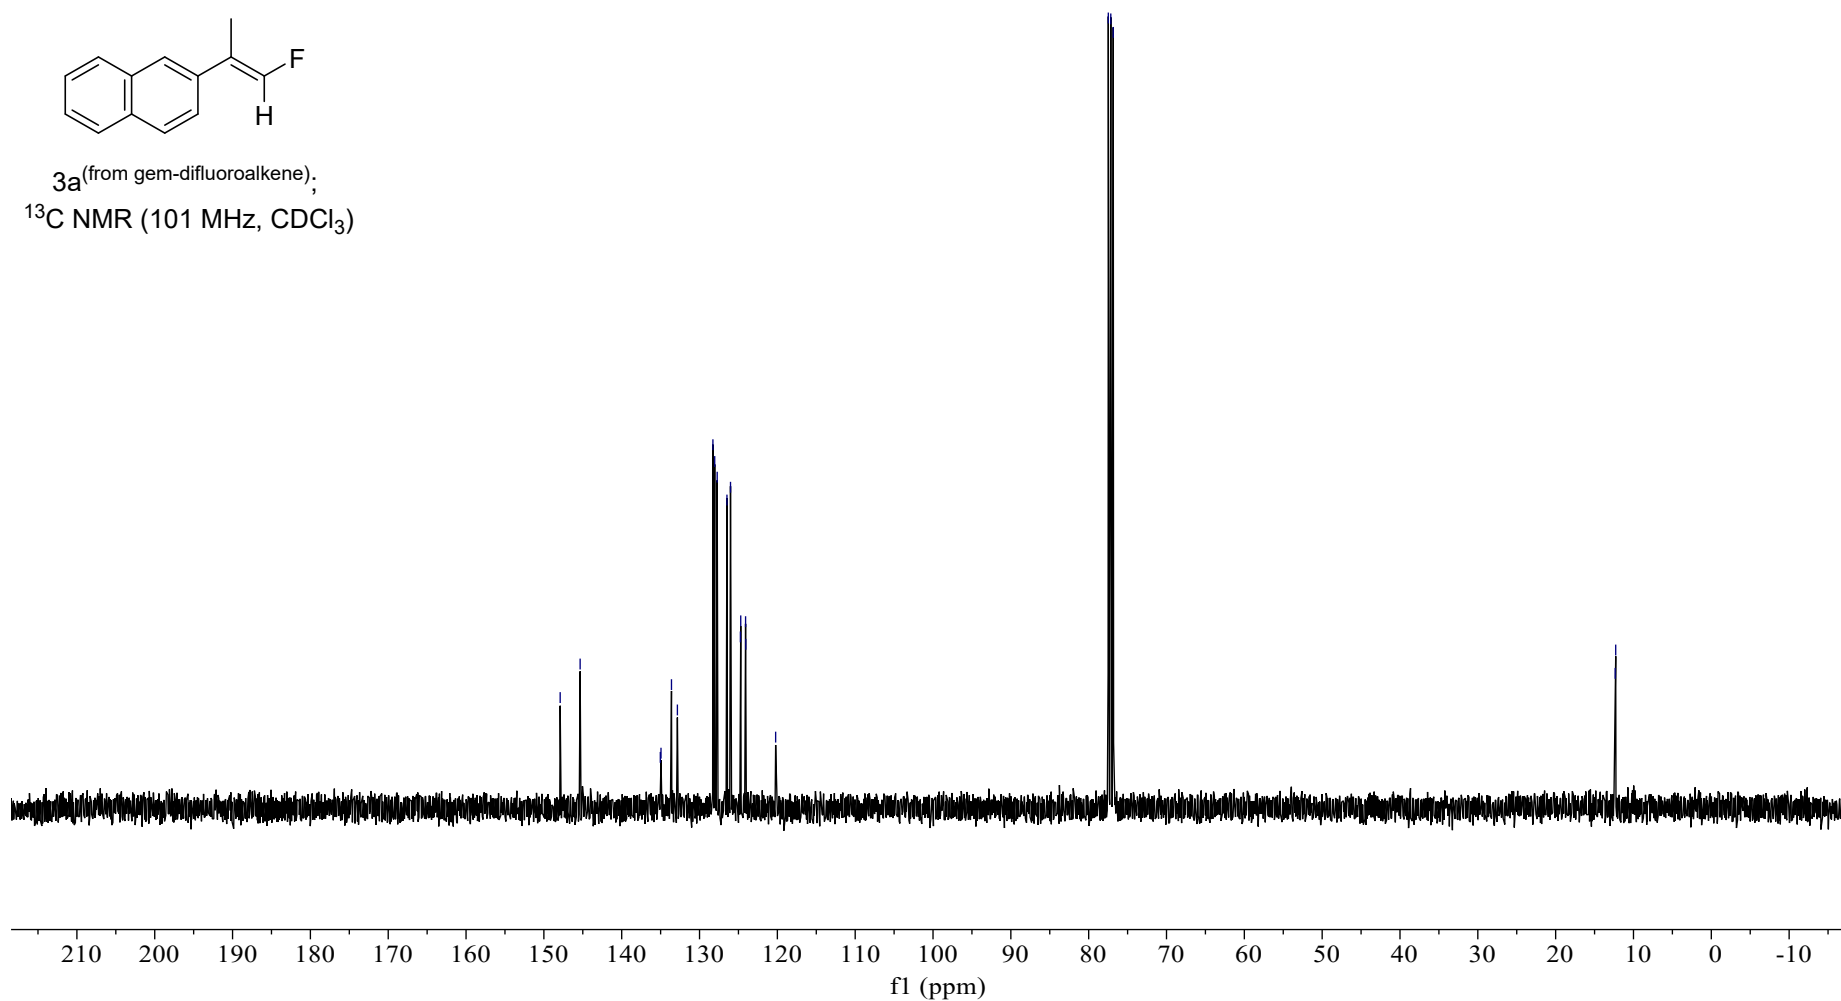

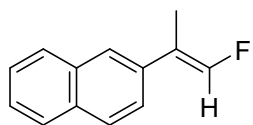

3a (from gem-difluoroalkene),  
<sup>19</sup>F NMR (376 MHz, CDCl<sub>3</sub>)

-128.20  
-128.21  
-128.22  
-128.24  
-128.42  
-128.43  
-128.45  
-128.46  
-130.21  
-130.22  
-130.23  
-130.24  
-130.44  
-130.45  
-130.46  
-130.47

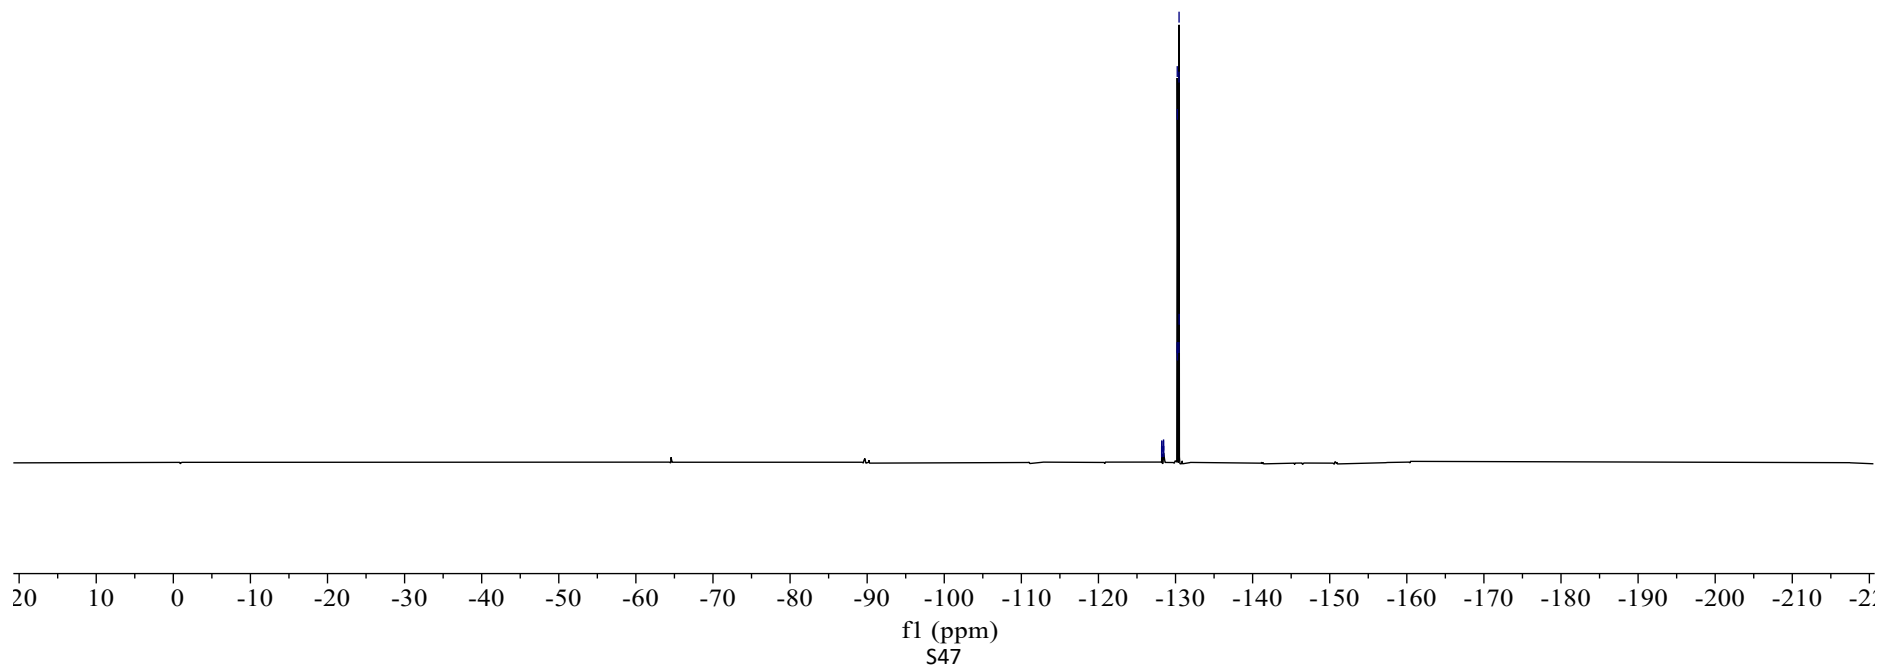

# Mass Spectrum SmartFormula Report

## Analysis Info

Analysis Name D:\LXMS\0106\_RC8\_01\_20525.d  
Method LC\_NO UV\_P50-1500\_6MIN.m  
Sample Name 0106

Acquisition D 2023-01-09 11:26:06

Operator Demo User  
Instrument compact 8255754.2017  
6

## Comment

## Acquisition Paramet

|             |            |               |          |                |           |
|-------------|------------|---------------|----------|----------------|-----------|
| Source Type | ESI        | Ion Polarity  | Positive | Set Nebulizer  | 3.0 Bar   |
| Focus       | Not active | Set Capillary | 4000 V   | Set Dry Heater | 200 °C    |
| Scan Begin  | 50 m/z     | Set End Plate | -500 V   | Set Dry Gas    | 8.0 l/min |

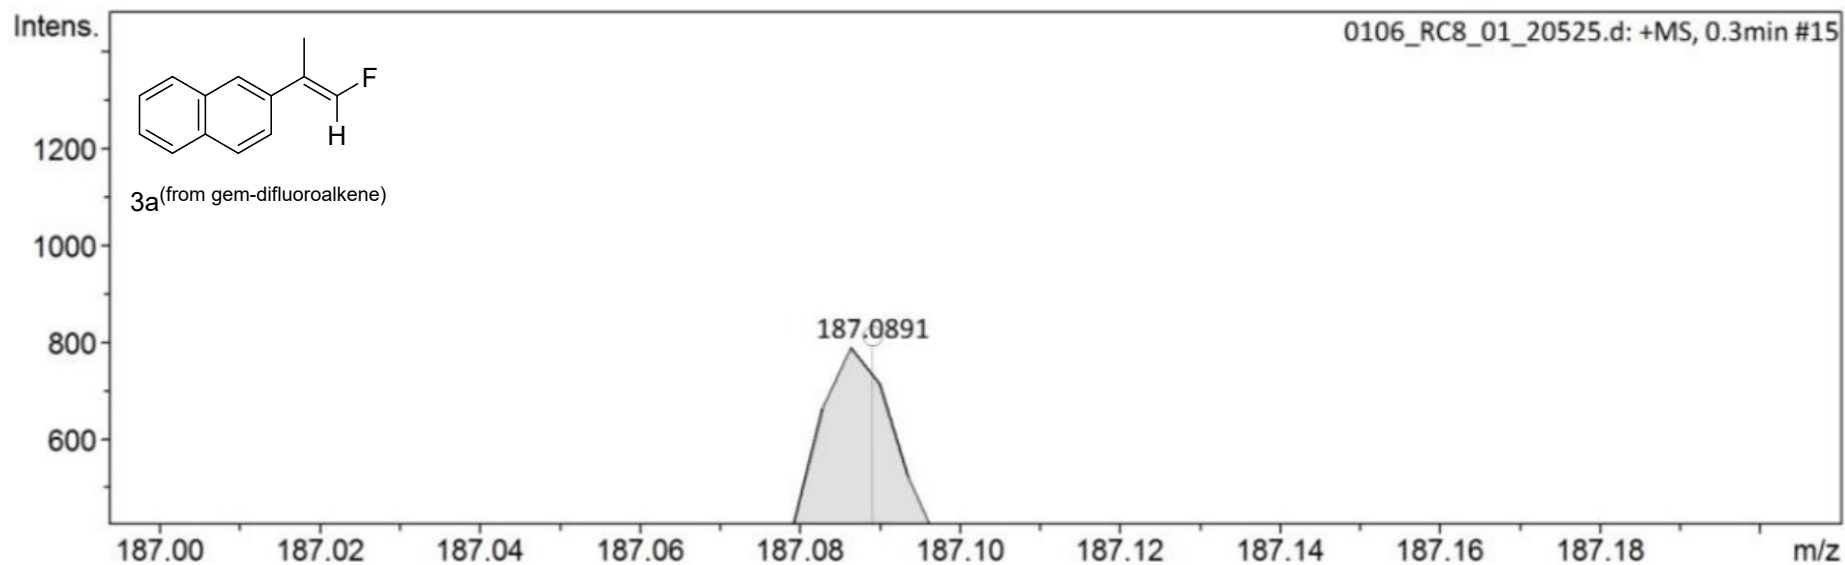

| Meas. m/z | # | Ion Formula | m/z      | err [ppm] | mSigma | # | mSigma | Score | rdb  | e;¥ | Conf | N-Rule |
|-----------|---|-------------|----------|-----------|--------|---|--------|-------|------|-----|------|--------|
| 187.0891  | 1 | C13H12F     | 187.0918 | 14.3      | n.a.   | 1 | 100.00 | 7.5   | even |     |      | ok     |

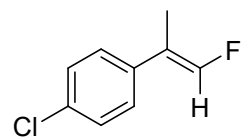

<sup>1</sup>H NMR  
(400 MHz, CDCl<sub>3</sub>)

7.31  
7.30  
7.29  
7.26  
7.24  
7.23  
7.22  
7.00  
6.99  
6.99  
6.98  
6.78  
6.78  
6.78  
6.77  
6.77  
6.76  
6.76  
6.56  
6.56  
6.55  
6.55

2.03  
2.02  
2.02  
2.01  
1.90  
1.89  
1.89  
1.88

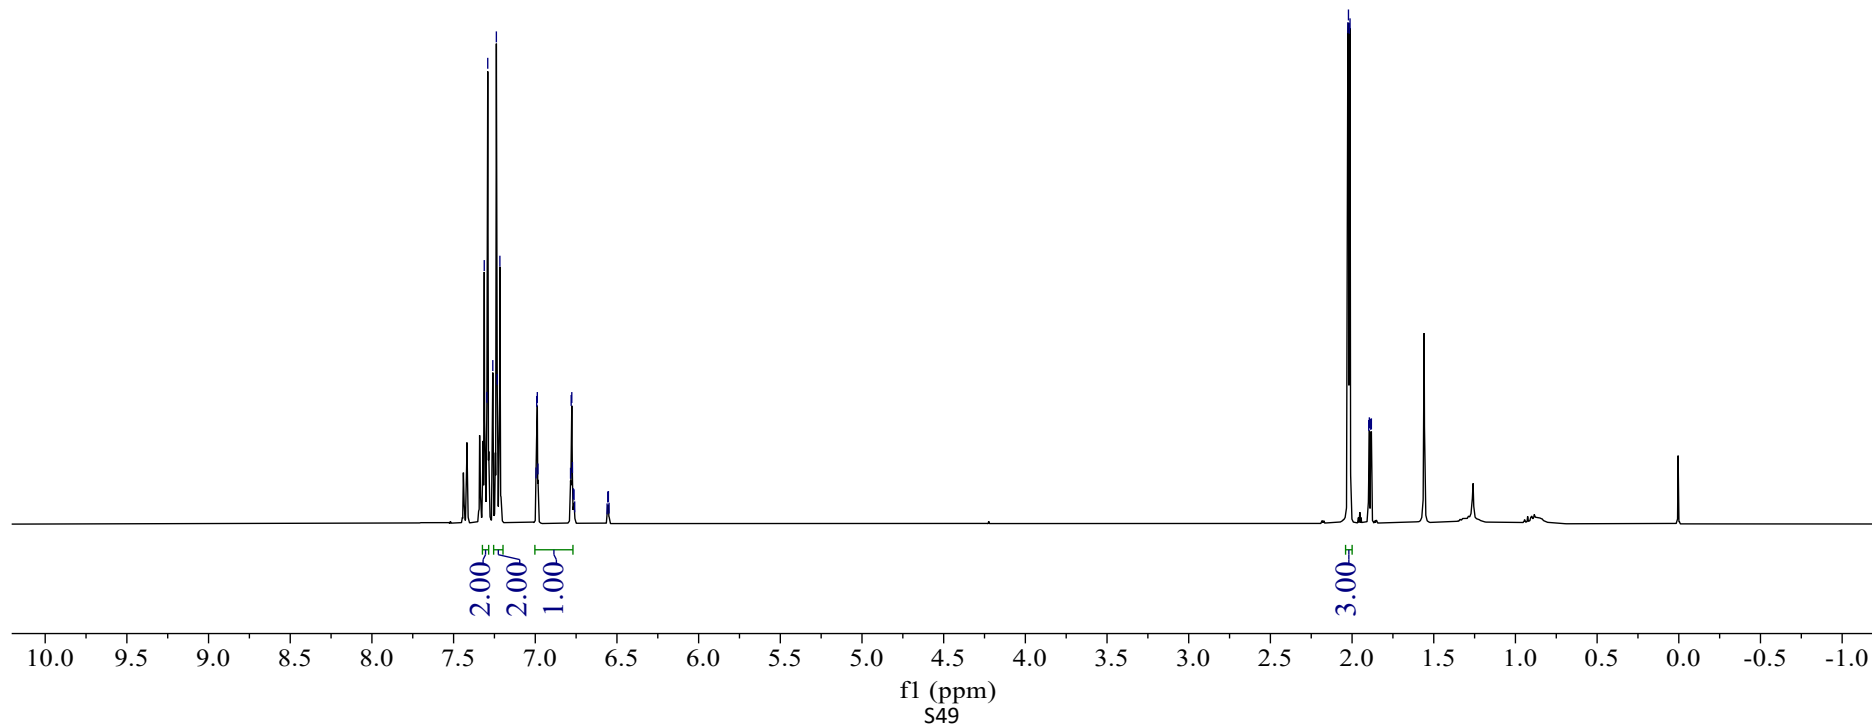

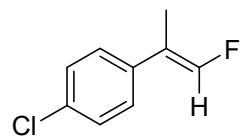

$^{13}\text{C}$  NMR  
(101 MHz,  $\text{CDCl}_3$ )

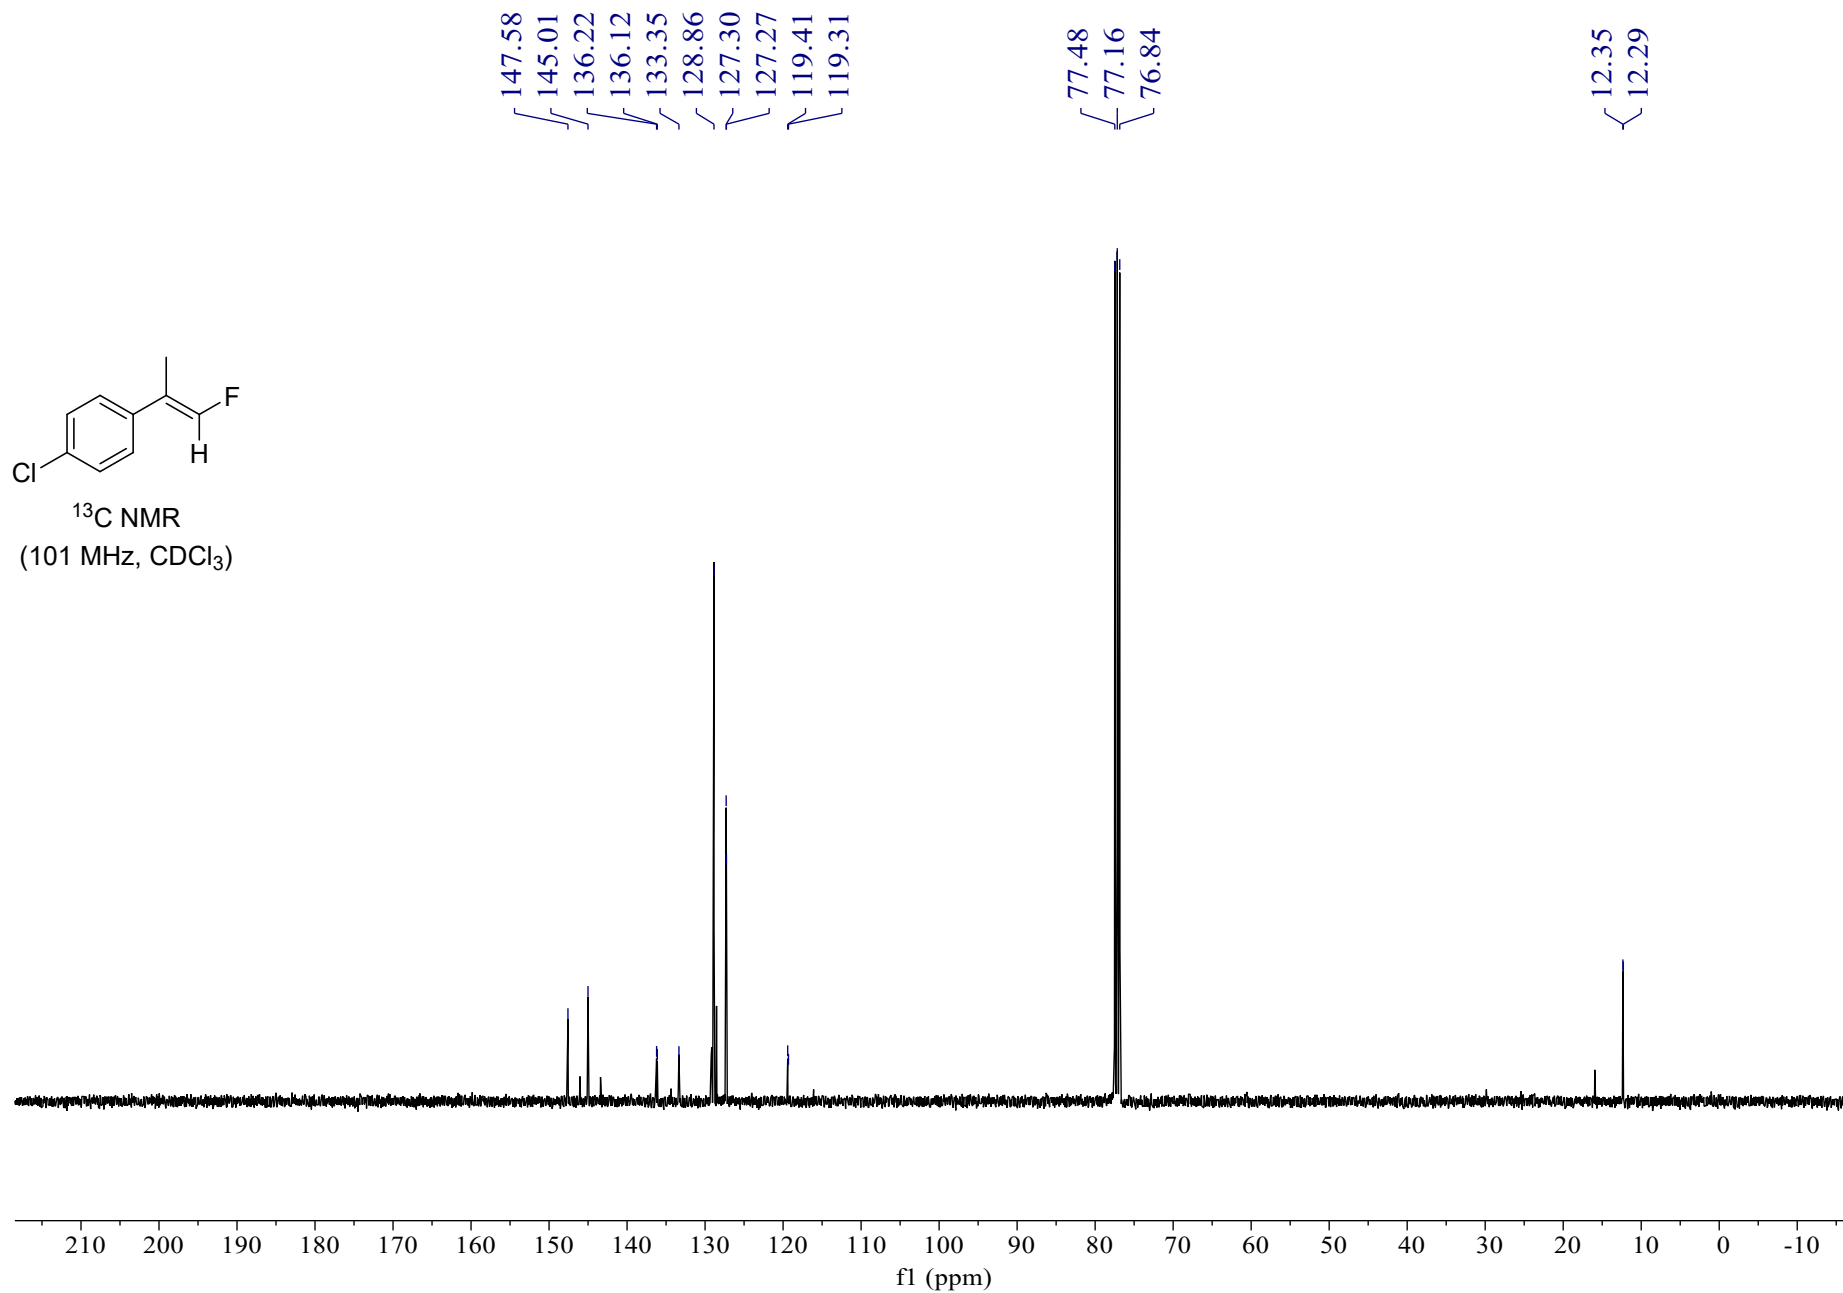

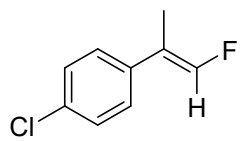

<sup>19</sup>F NMR  
(376 MHz, CDCl<sub>3</sub>)

-127.62  
-127.63  
-127.65  
-127.66  
-127.84  
-127.86  
-127.87  
-127.88  
-129.92  
-129.93  
-129.94  
-129.95  
-130.14  
-130.15  
-130.16  
-130.17

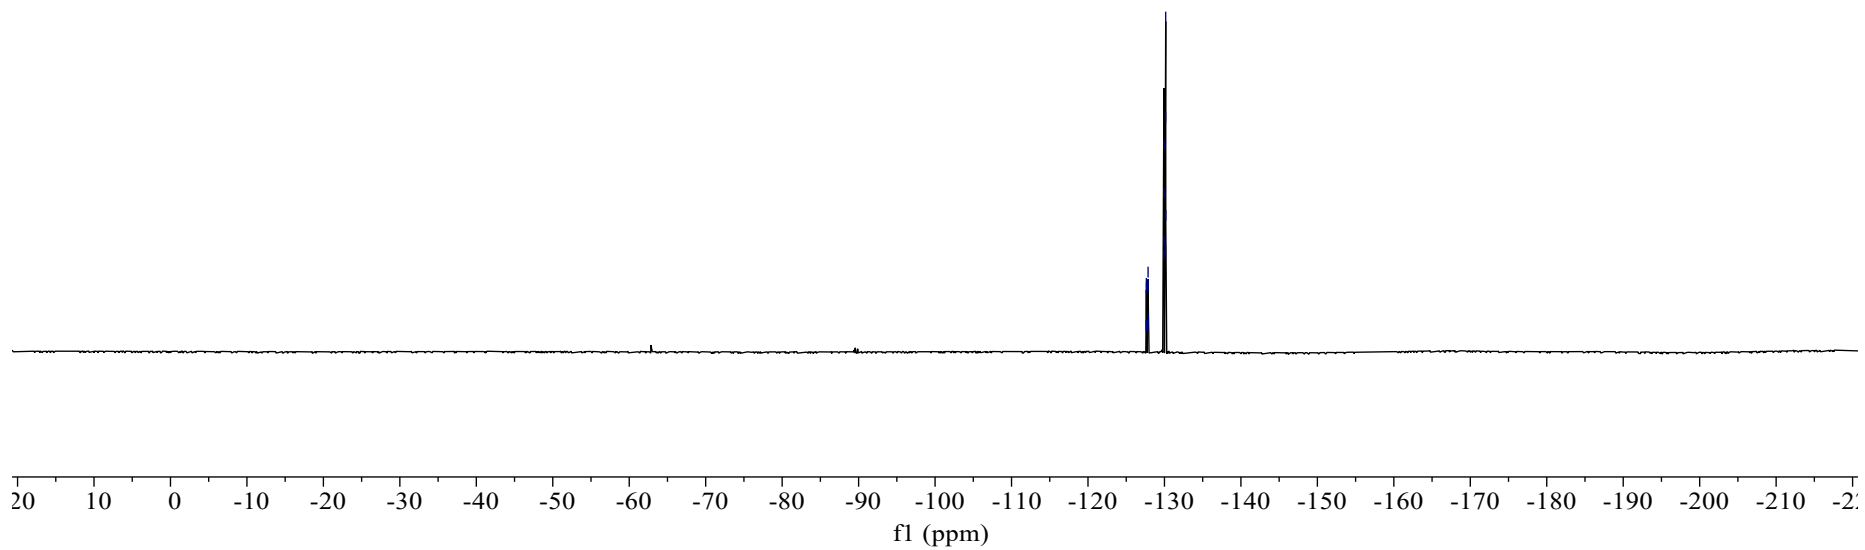

LX-21 #49 RT: 0.37 AV: 1 NL: 1.95E5  
 T: FTMS + p ESI Full ms [100.0000-1500.0000]

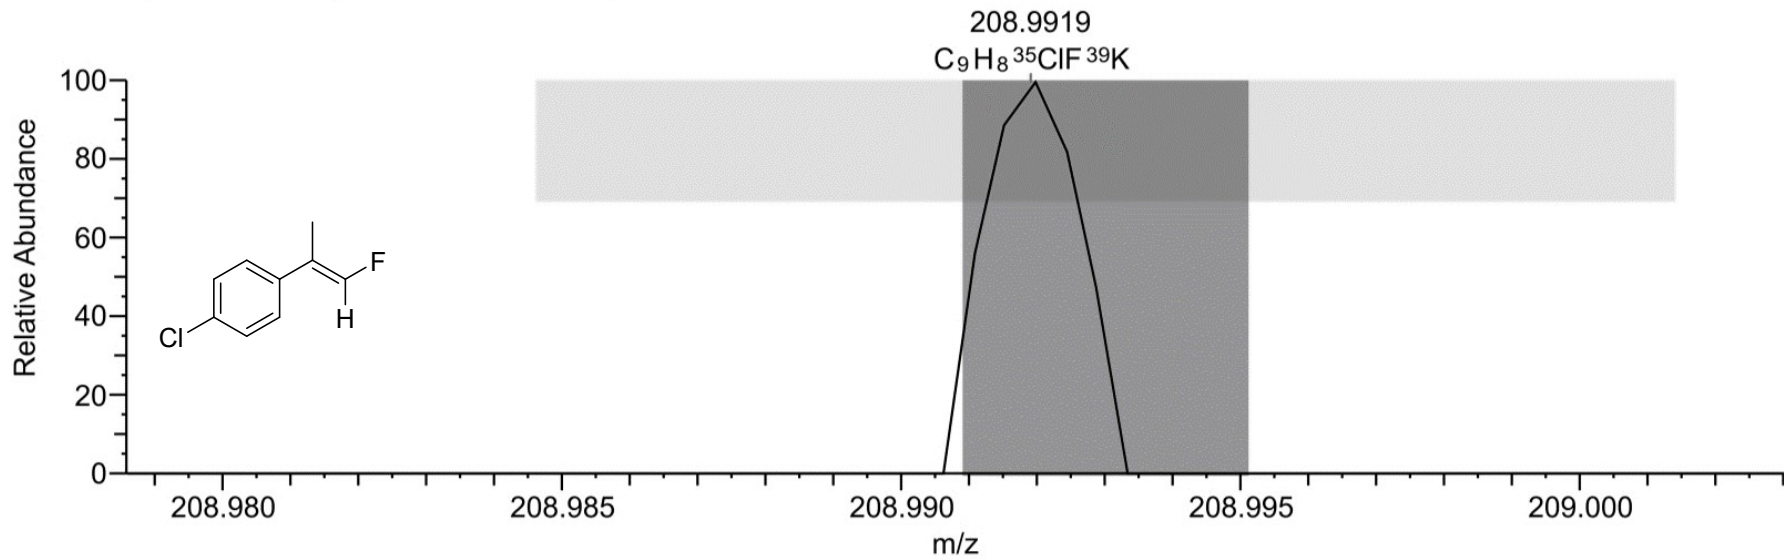

| Peak M... | Display...             | S Fit                    | RDB  | Delta [p... | Theo....  | Rank | Combin... | # Matc... | # Misse... | MS Cov... | Pattern... | MSMS...      |
|-----------|------------------------|--------------------------|------|-------------|-----------|------|-----------|-----------|------------|-----------|------------|--------------|
| 208.9919  | $C_9H_8^{35}ClF^{39}K$ | 63.2380<br>350586<br>169 | 4.50 | -5.20       | 208.99301 | 1    | 98.07     | 1         | 0          | 100       | 100        | (Collection) |



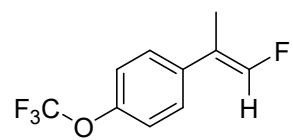

<sup>1</sup>H NMR  
(400 MHz, CDCl<sub>3</sub>)

7.33  
7.32  
7.31  
7.30  
7.19  
7.19  
7.19  
7.17  
7.17  
7.17  
6.99  
6.99  
6.98  
6.98  
6.78  
6.78  
6.77  
6.77

2.04  
2.04  
2.03  
2.03  
1.91  
1.91  
1.90  
1.90

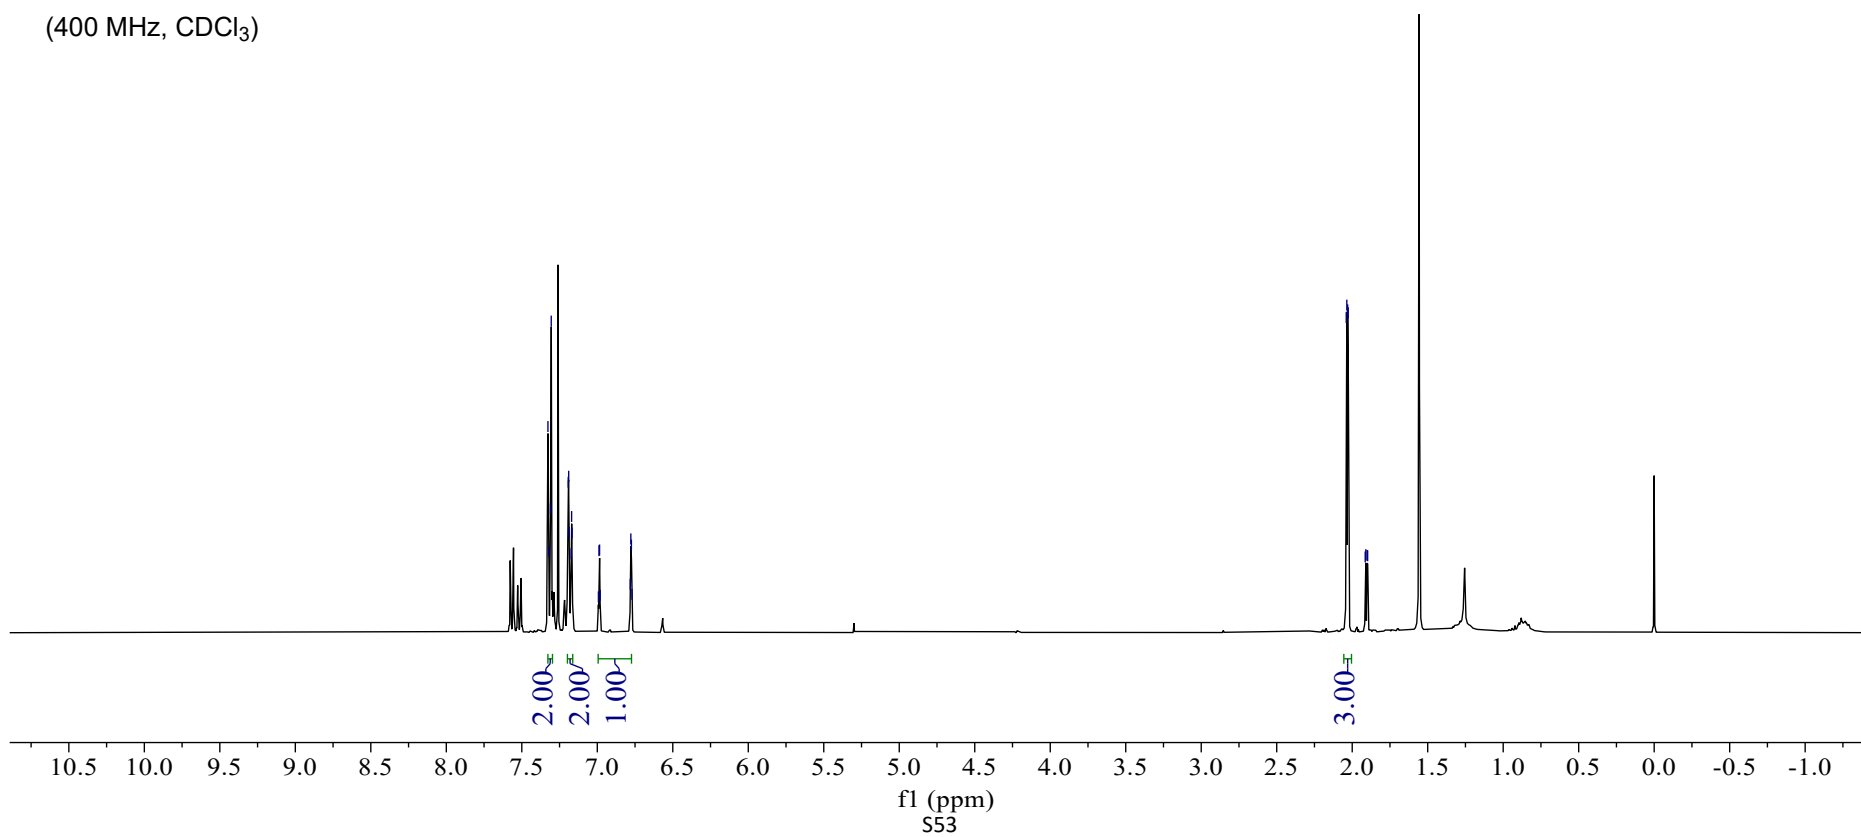

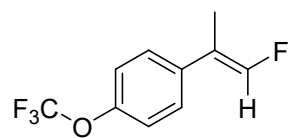

<sup>13</sup>C NMR  
(101 MHz, CD<sub>2</sub>Cl<sub>2</sub>)

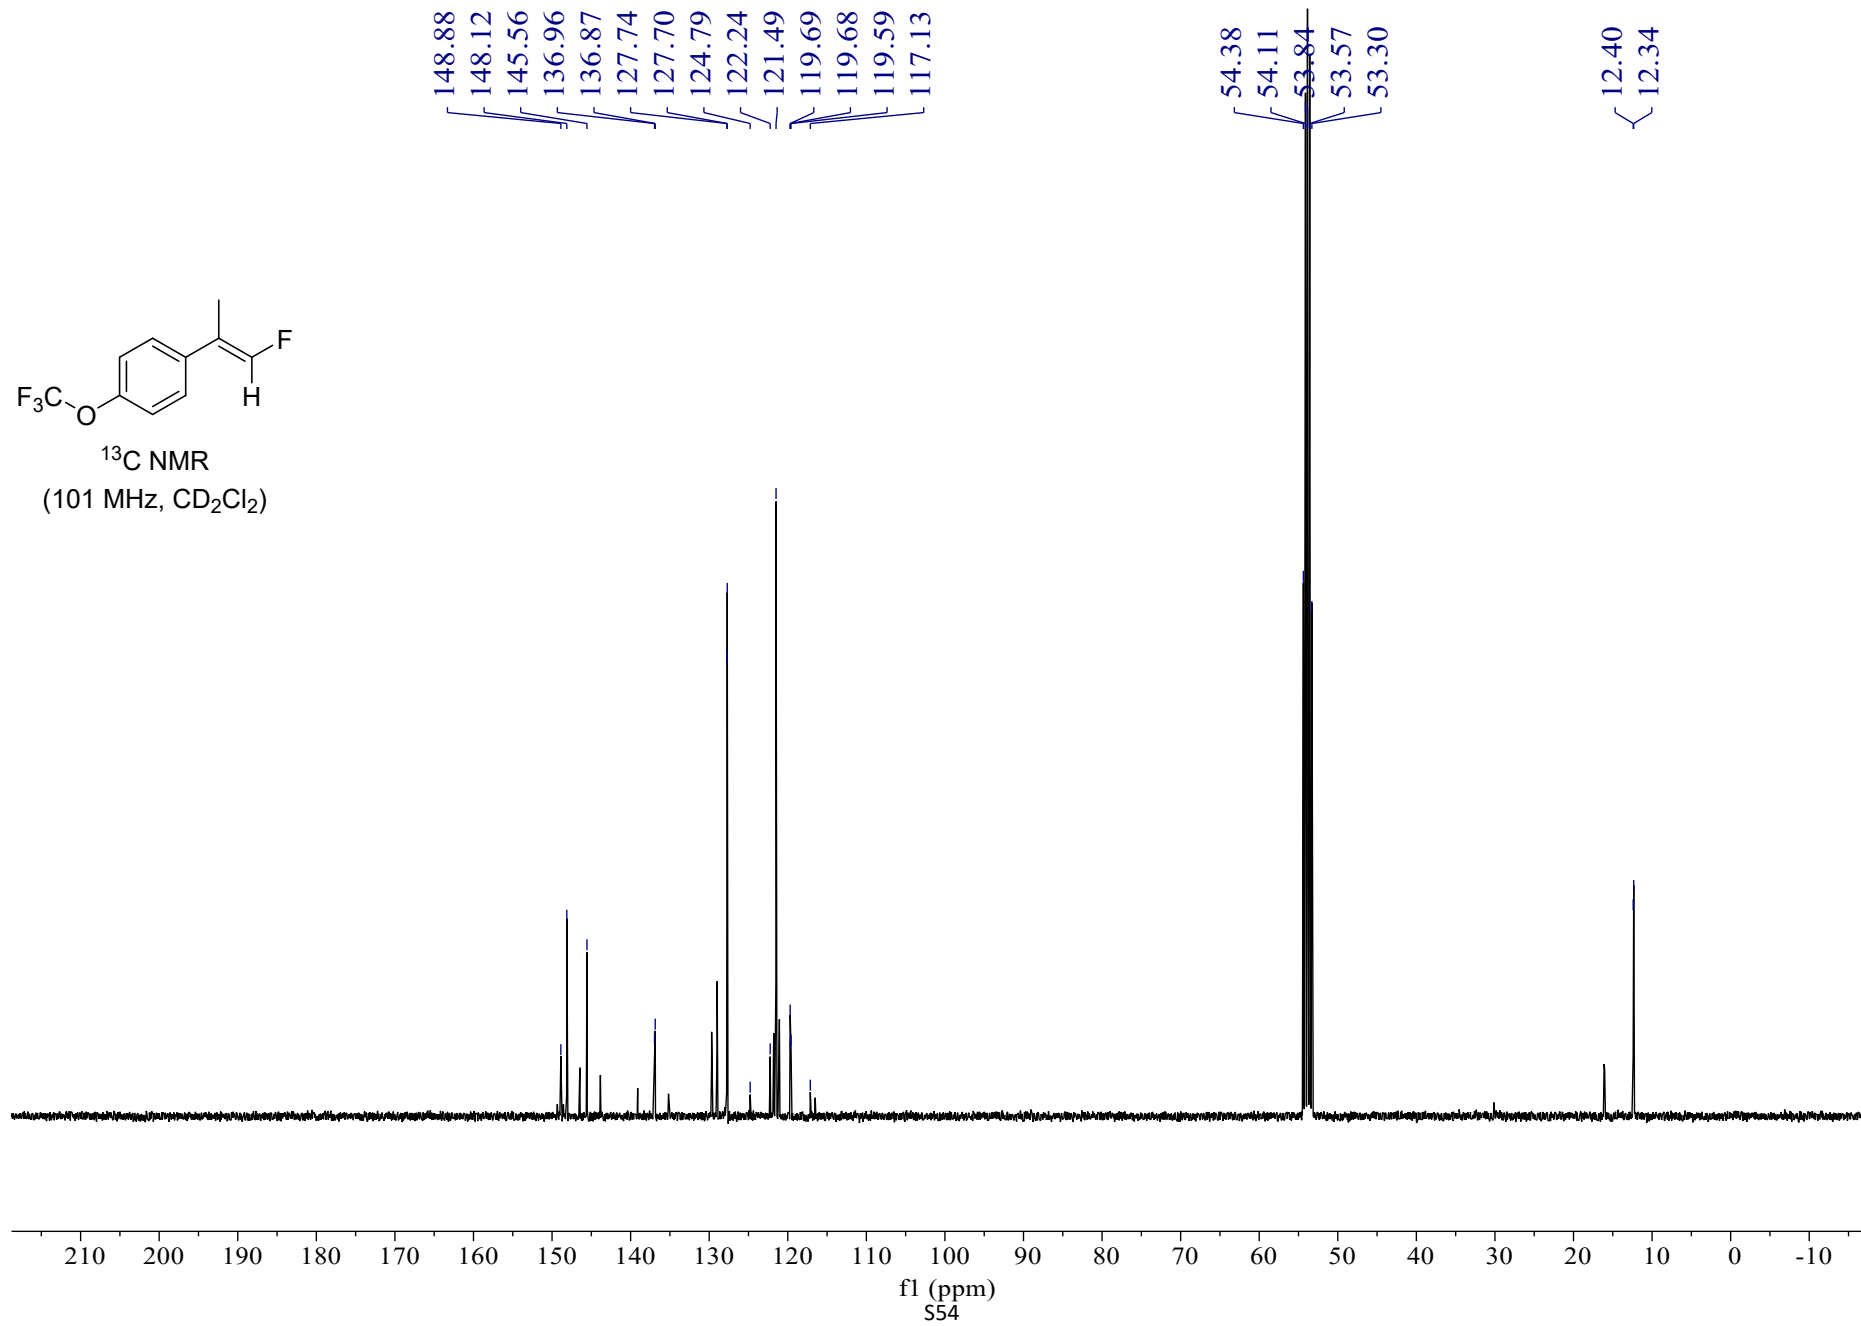

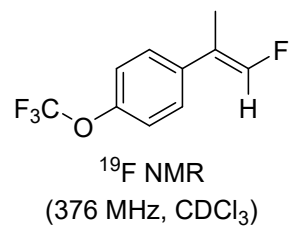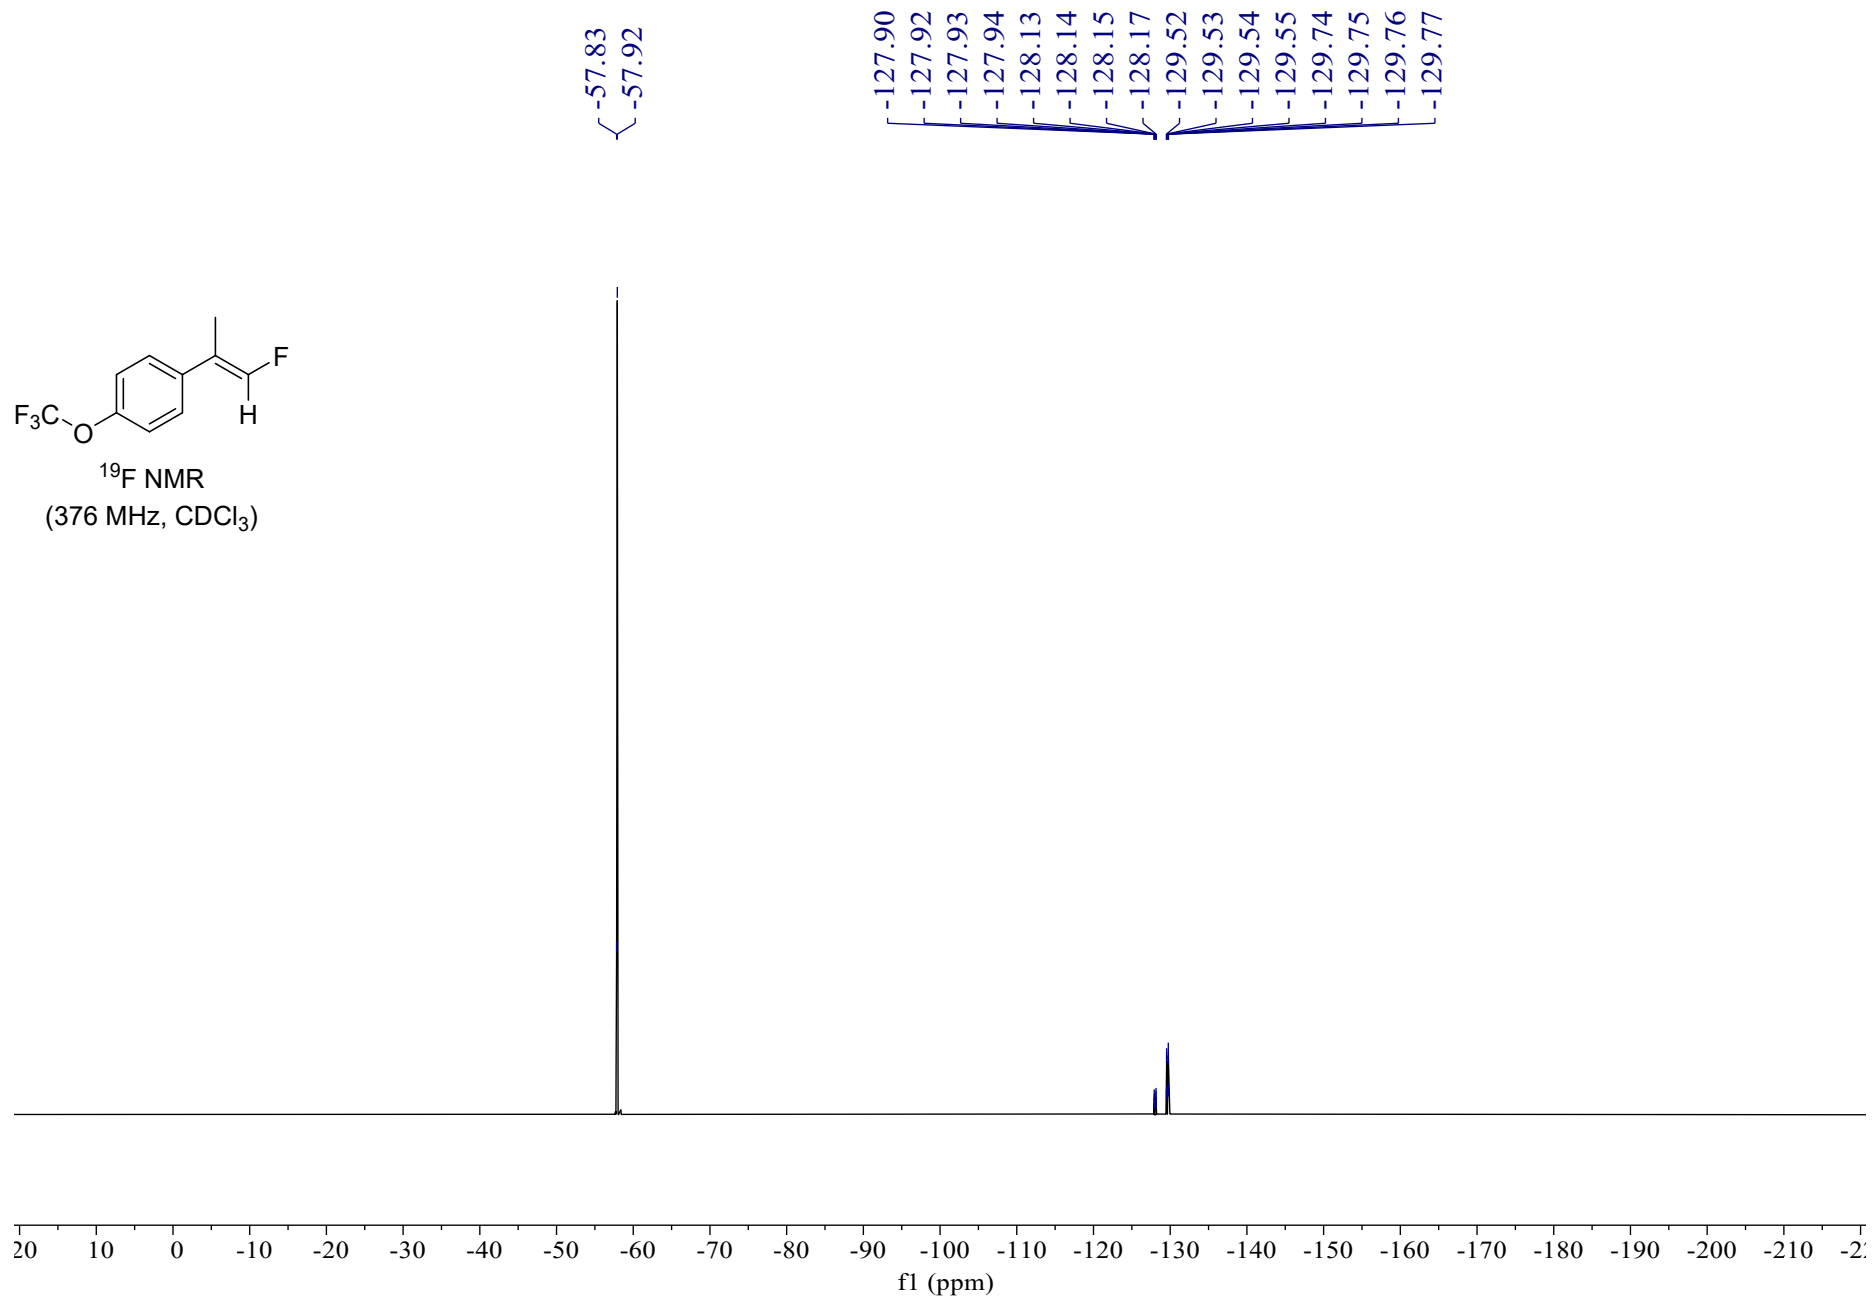

LX-22 #20 RT: 0.15 AV: 1 NL: 2.03E5  
 T: FTMS - p ESI Full ms [100.0000-1500.0000]

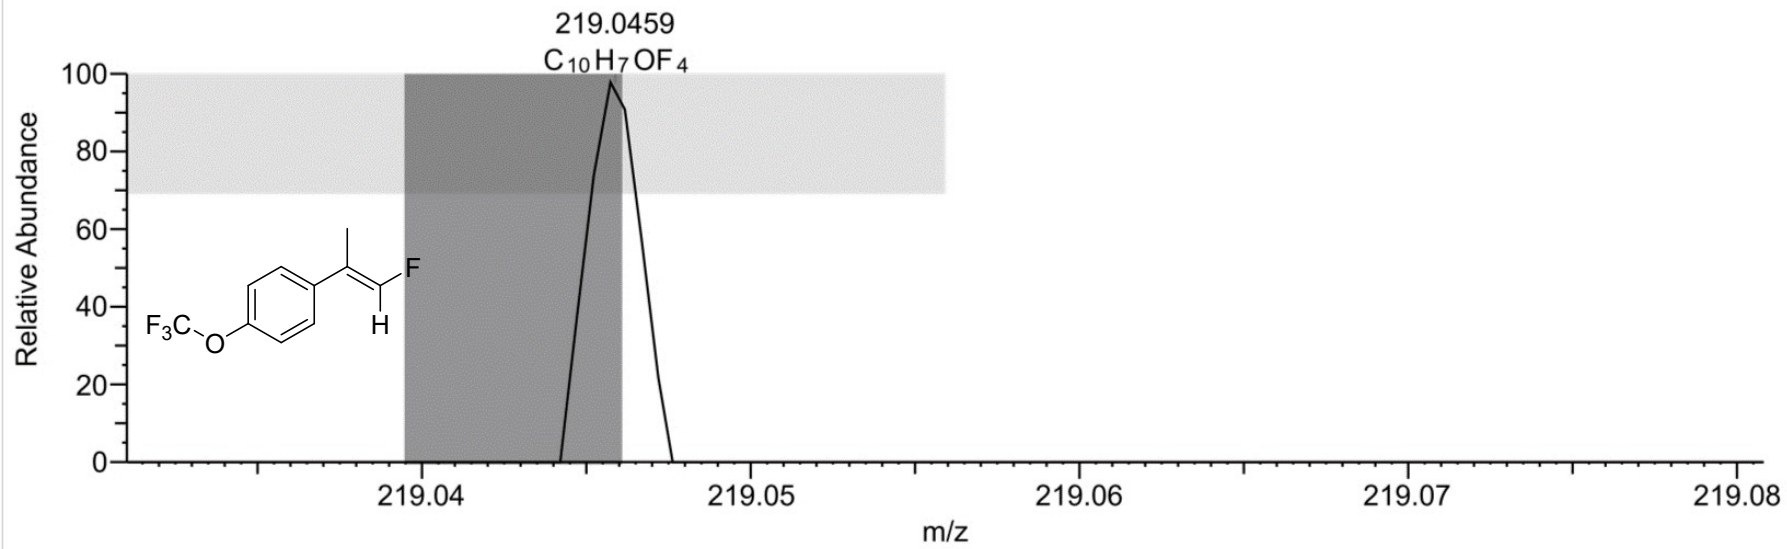

| Peak M...    | Display...         | S Fit                    | RDB  | Delta [p... | Theo....      | Rank | Combin... | # Matc... | # Misse... | MS Cov... | Pattern... | MSMS...          |
|--------------|--------------------|--------------------------|------|-------------|---------------|------|-----------|-----------|------------|-----------|------------|------------------|
| 219.045<br>9 | $C_{10}H_7OF$<br>4 | 32.6610<br>916173<br>134 | 5.50 | 14.28       | 219.042<br>75 | 1    | 96.46     | 1         | 0          | 100       | 100        | (Collect<br>ion) |

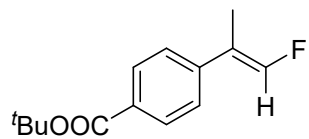

<sup>1</sup>H NMR  
(400 MHz, CDCl<sub>3</sub>)

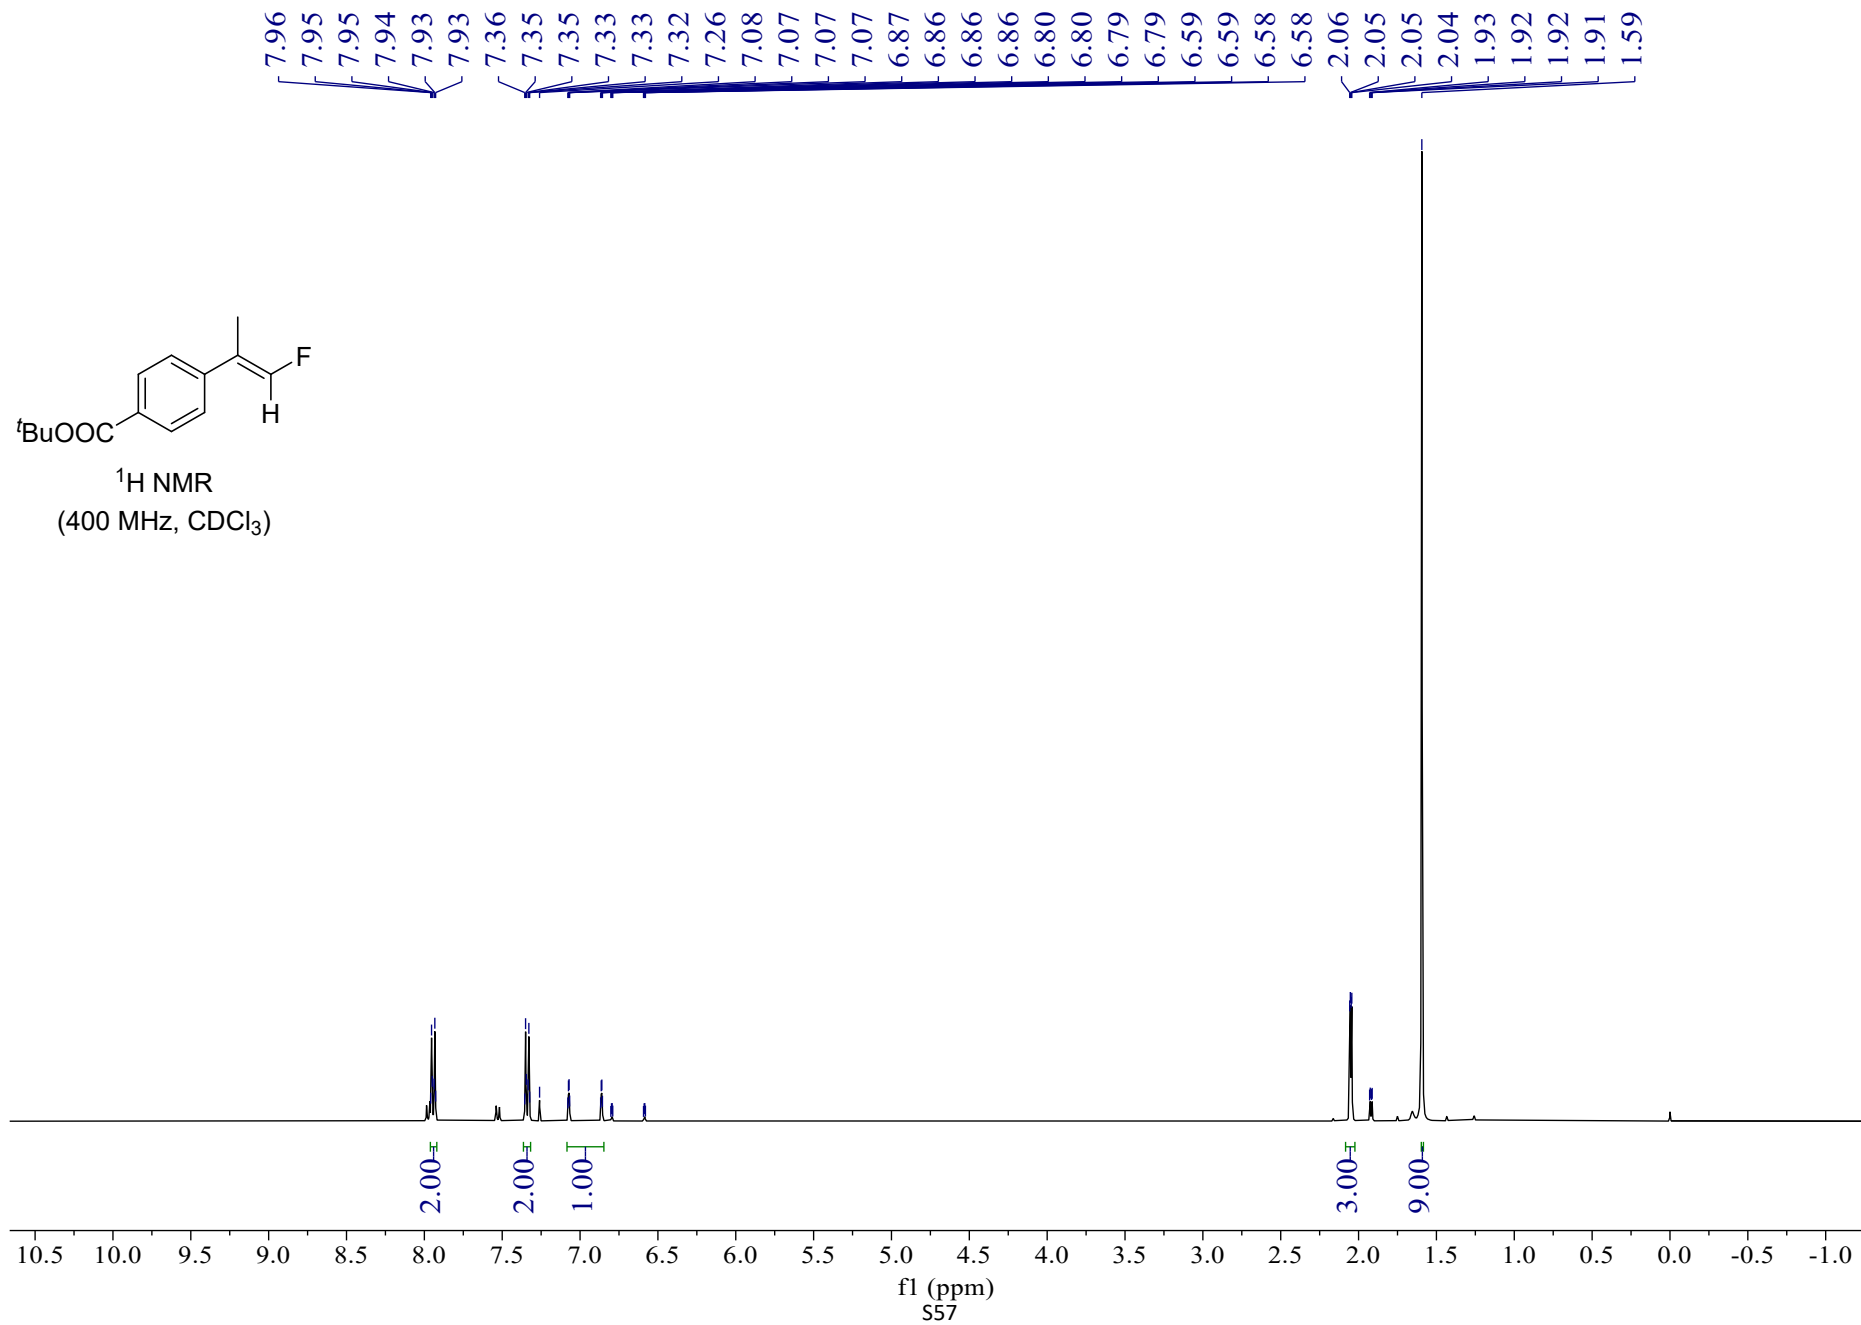

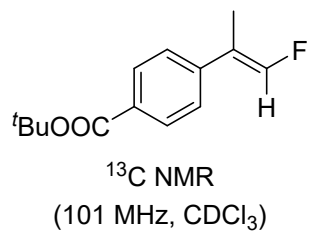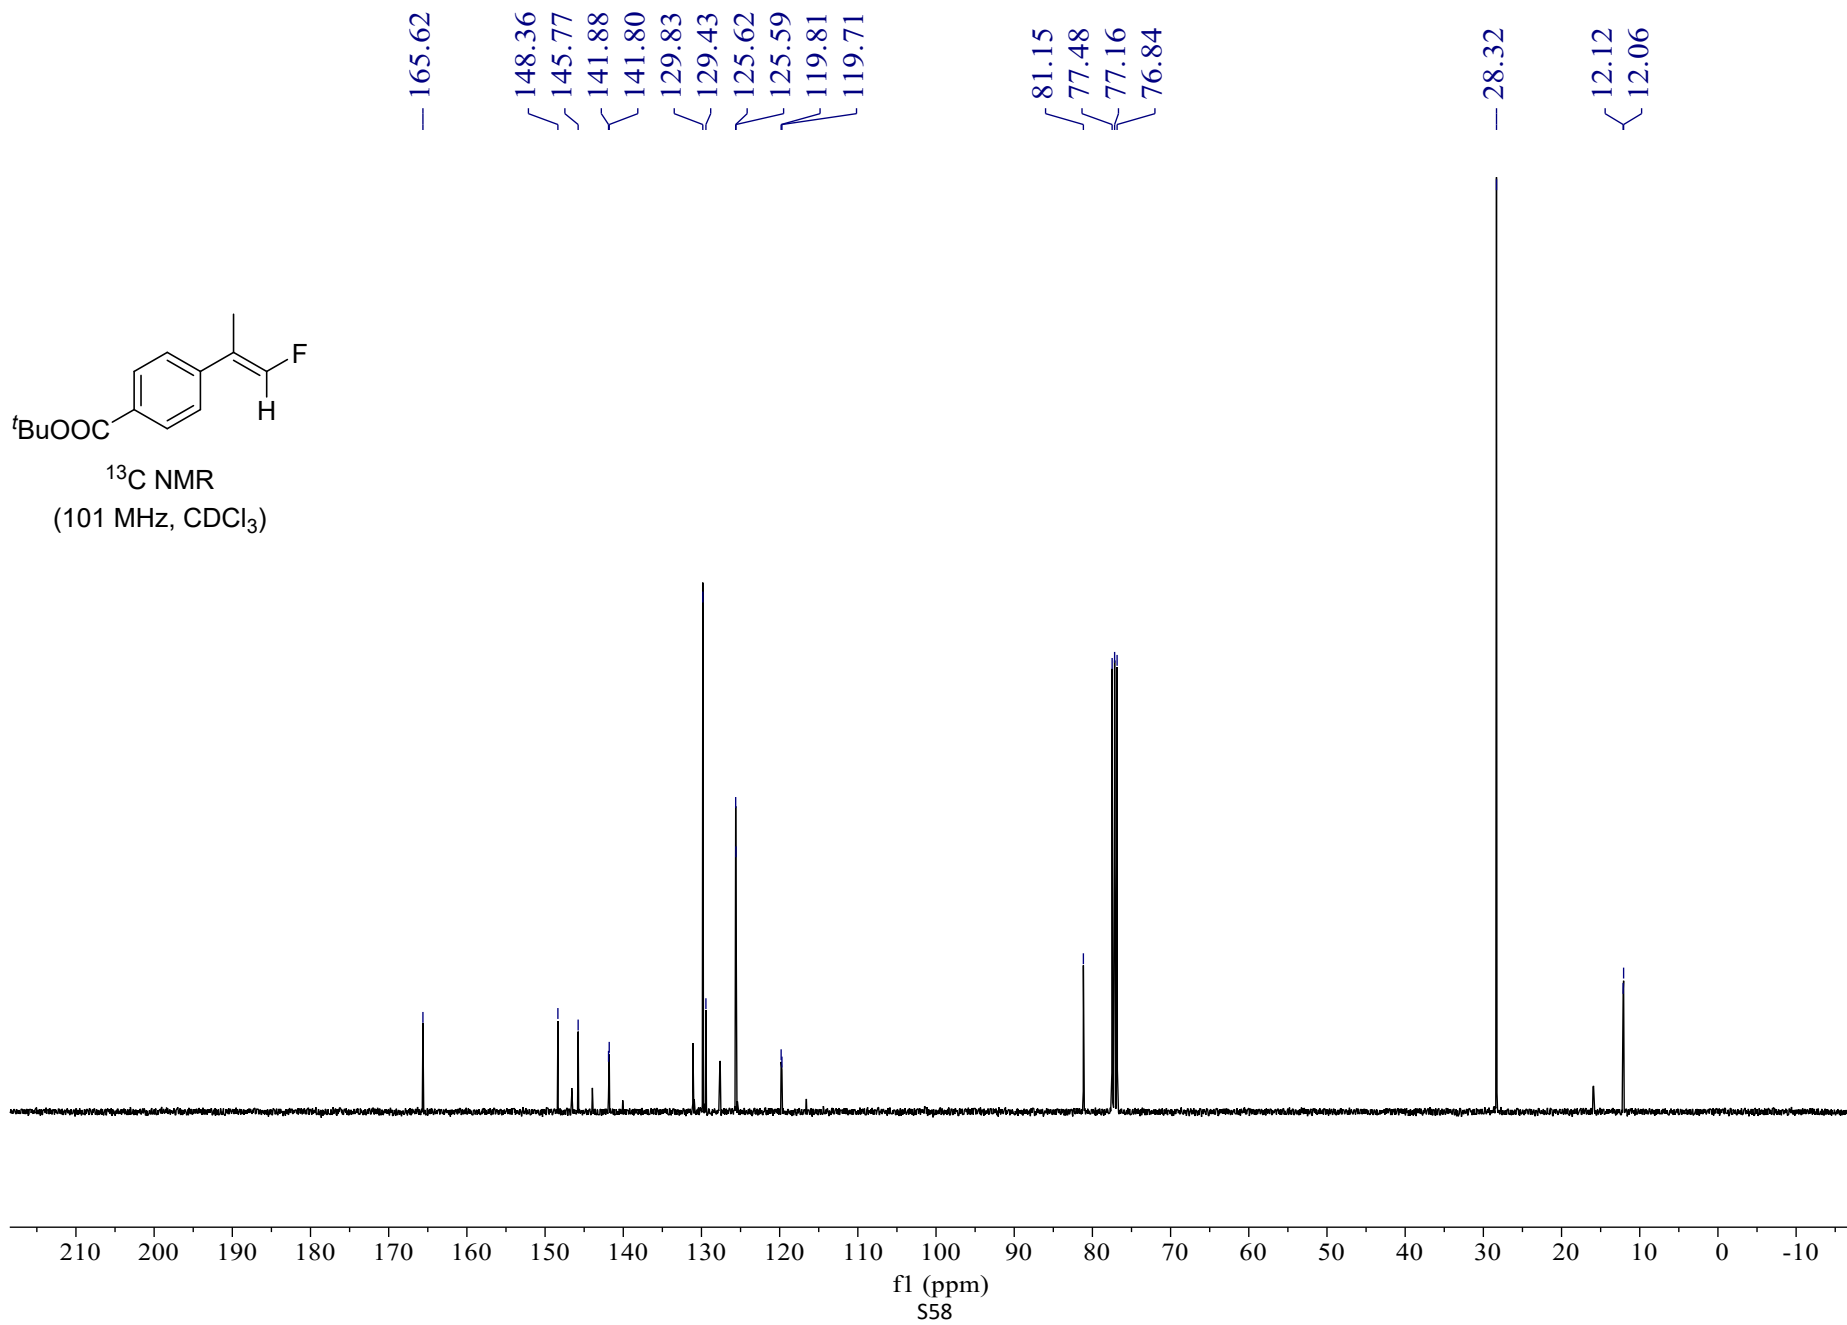

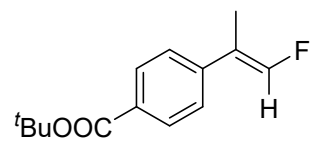

<sup>19</sup>F NMR  
(376 MHz, CDCl<sub>3</sub>)

-126.17  
-126.18  
-126.19  
-126.21  
-126.39  
-126.40  
-126.42  
-126.43  
-128.32  
-128.33  
-128.35  
-128.35  
-128.55  
-128.56  
-128.57  
-128.58

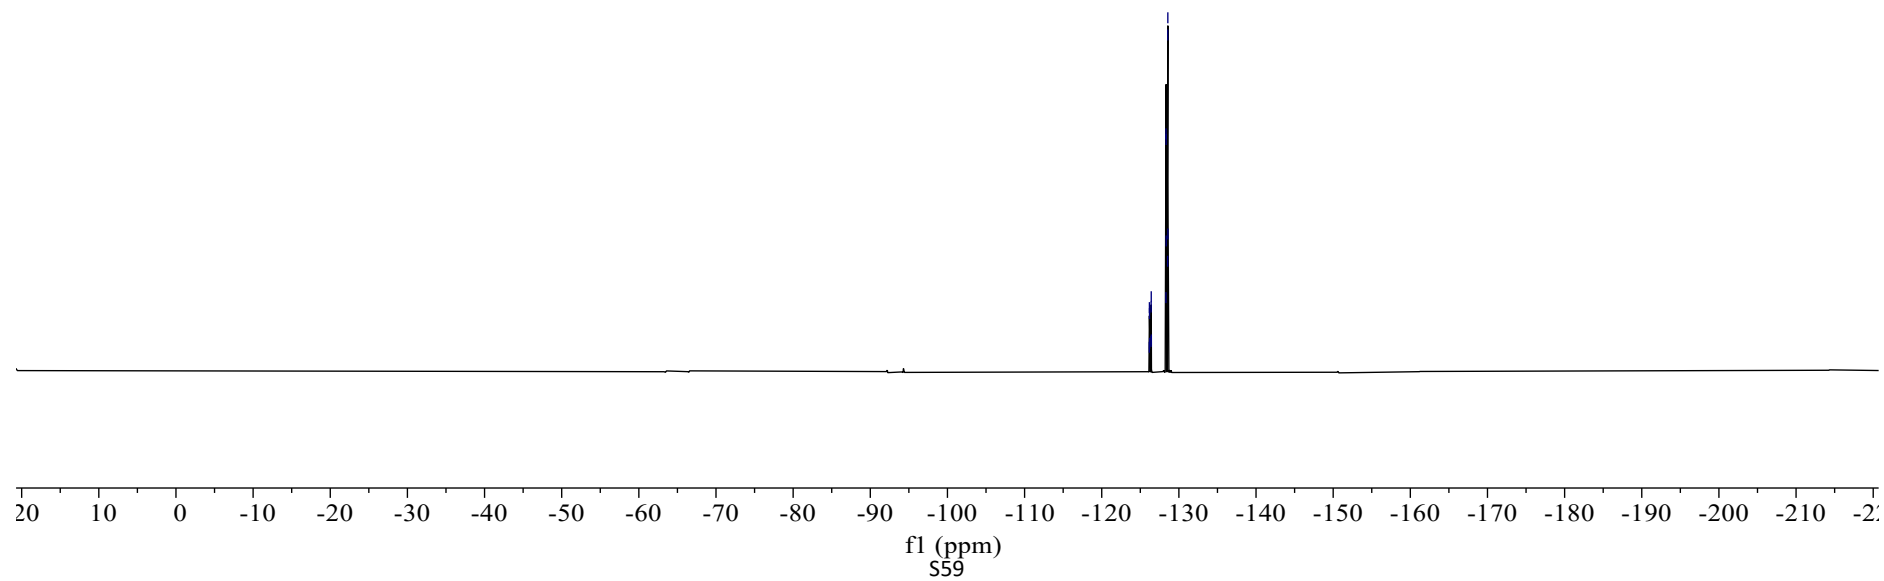

LX-5 #15 RT: 0.11 AV: 1 NL: 9.05E5  
 T: FTMS + p ESI Full ms [100.0000-1500.0000]

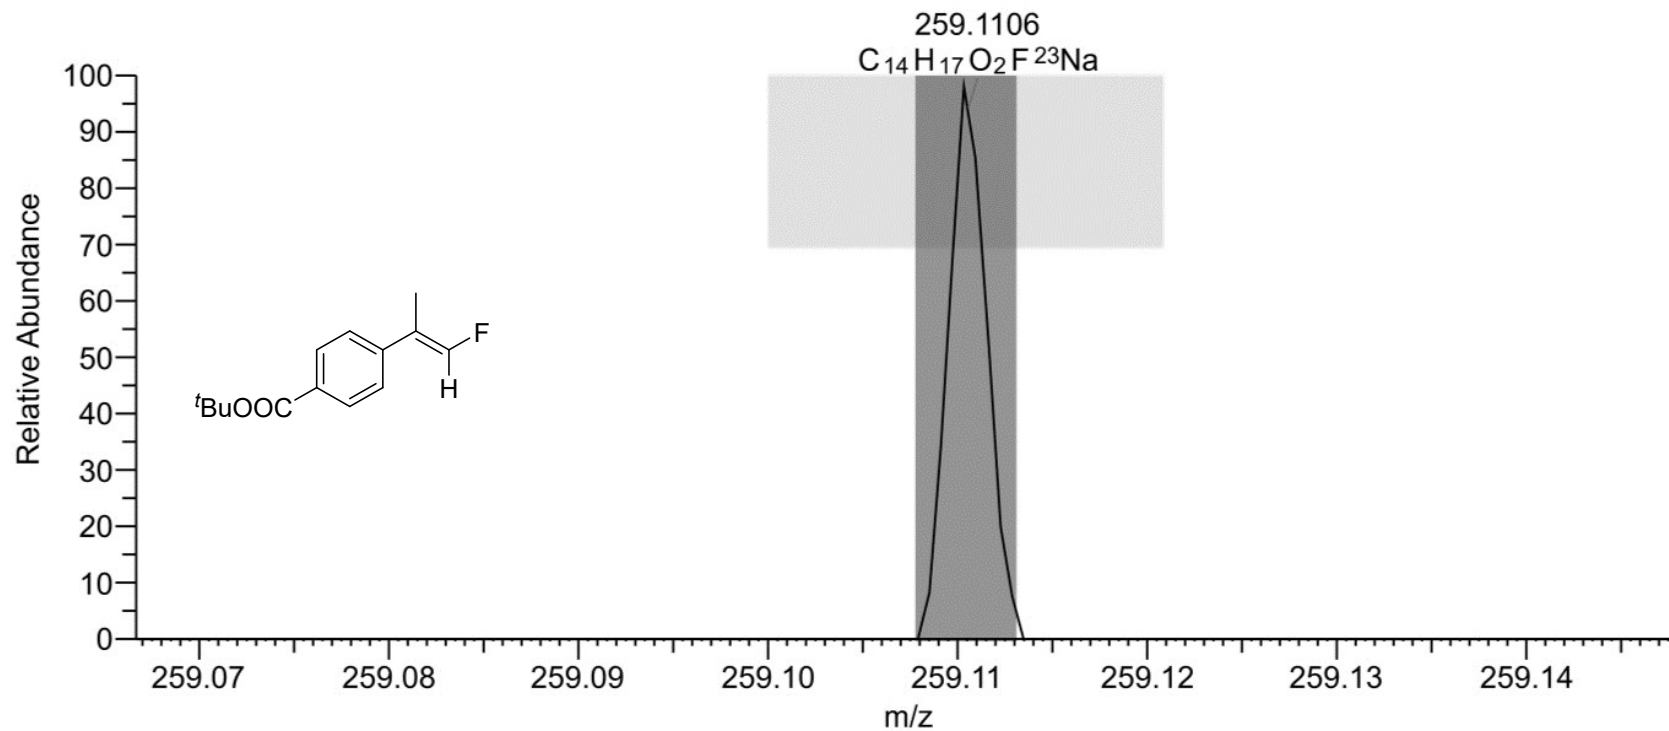

| Peak M...    | Display...                | S Fit                   | RDB  | Delta [p... | Theo....      | Rank | Combin... | # Matc... | # Misse... | MS Cov... | Pattern... | MSMS...          |
|--------------|---------------------------|-------------------------|------|-------------|---------------|------|-----------|-----------|------------|-----------|------------|------------------|
| 259.110<br>6 | $C_{14}H_{17}O_2F^{23}Na$ | 29.2698<br>617757<br>12 | 5.50 | 0.33        | 259.110<br>48 | 1    | 65.28     | 1         | 1          | 67.28     | 86.85      | (Collect<br>ion) |



7.28  
7.27  
7.27  
7.26  
7.25  
7.25  
7.24  
7.24  
7.23  
7.23  
7.19  
7.18  
7.18  
7.17  
7.17  
7.16  
7.15  
7.11  
7.10  
7.10  
7.09  
7.08  
7.08  
7.08  
7.01  
7.00  
7.00  
7.00  
6.80  
6.79  
6.79  
6.79

2.03  
2.02  
2.02  
2.01

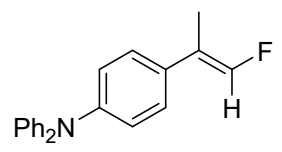

<sup>1</sup>H NMR  
(400 MHz, CDCl<sub>3</sub>)

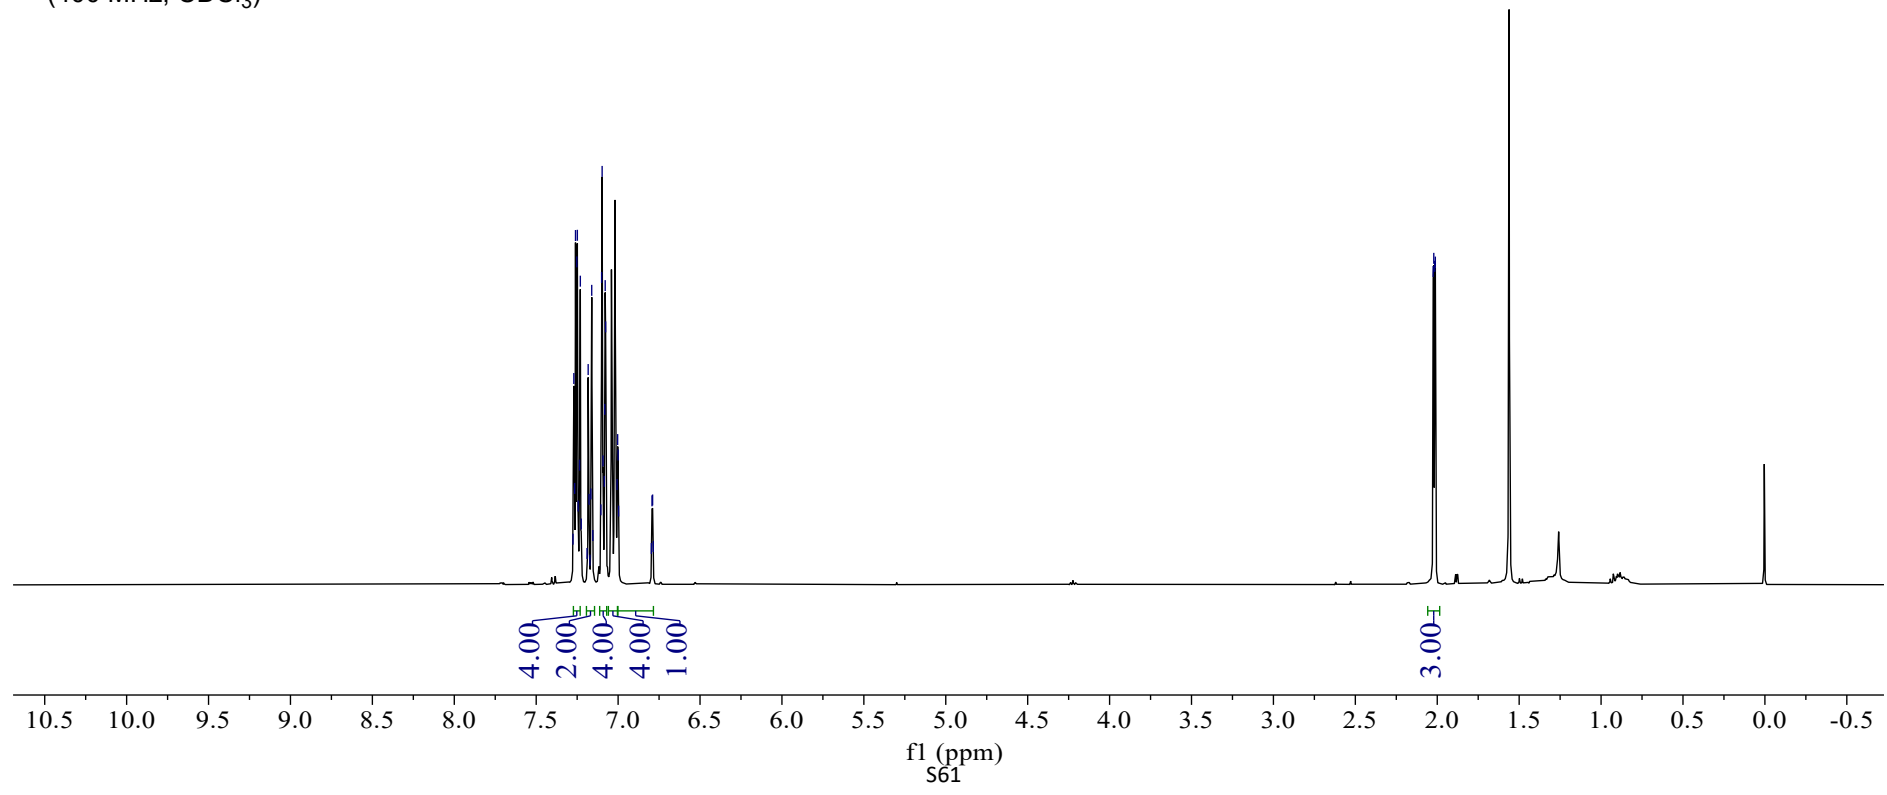

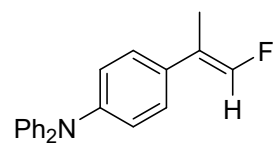

<sup>13</sup>C NMR  
(101 MHz, CDCl<sub>3</sub>)

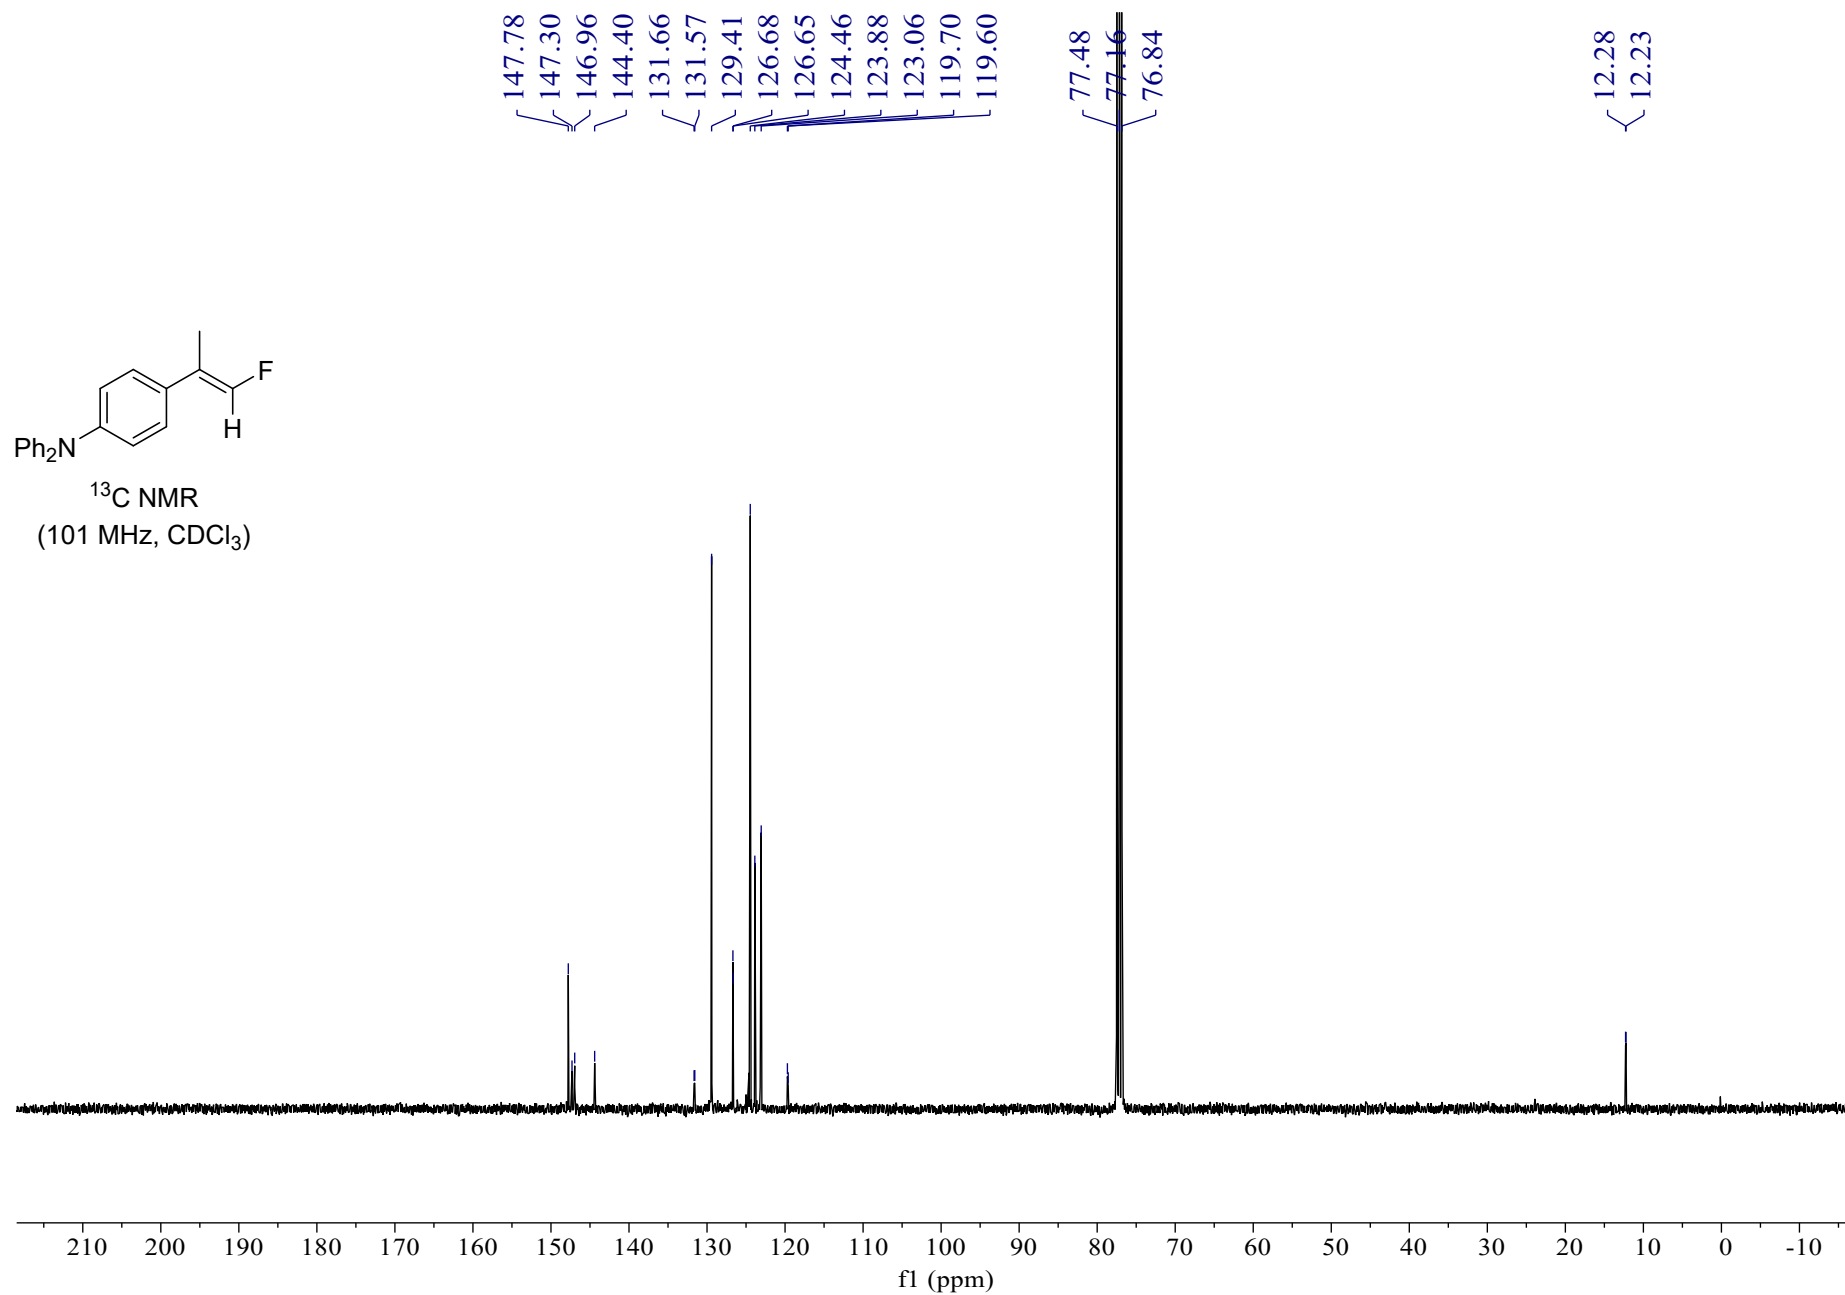

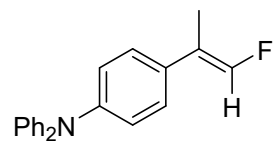

<sup>19</sup>F NMR  
(376 MHz, CDCl<sub>3</sub>)

-129.02  
-129.24  
-129.25  
-132.47  
-132.48  
-132.50  
-132.51  
-132.70  
-132.71  
-132.72  
-132.73

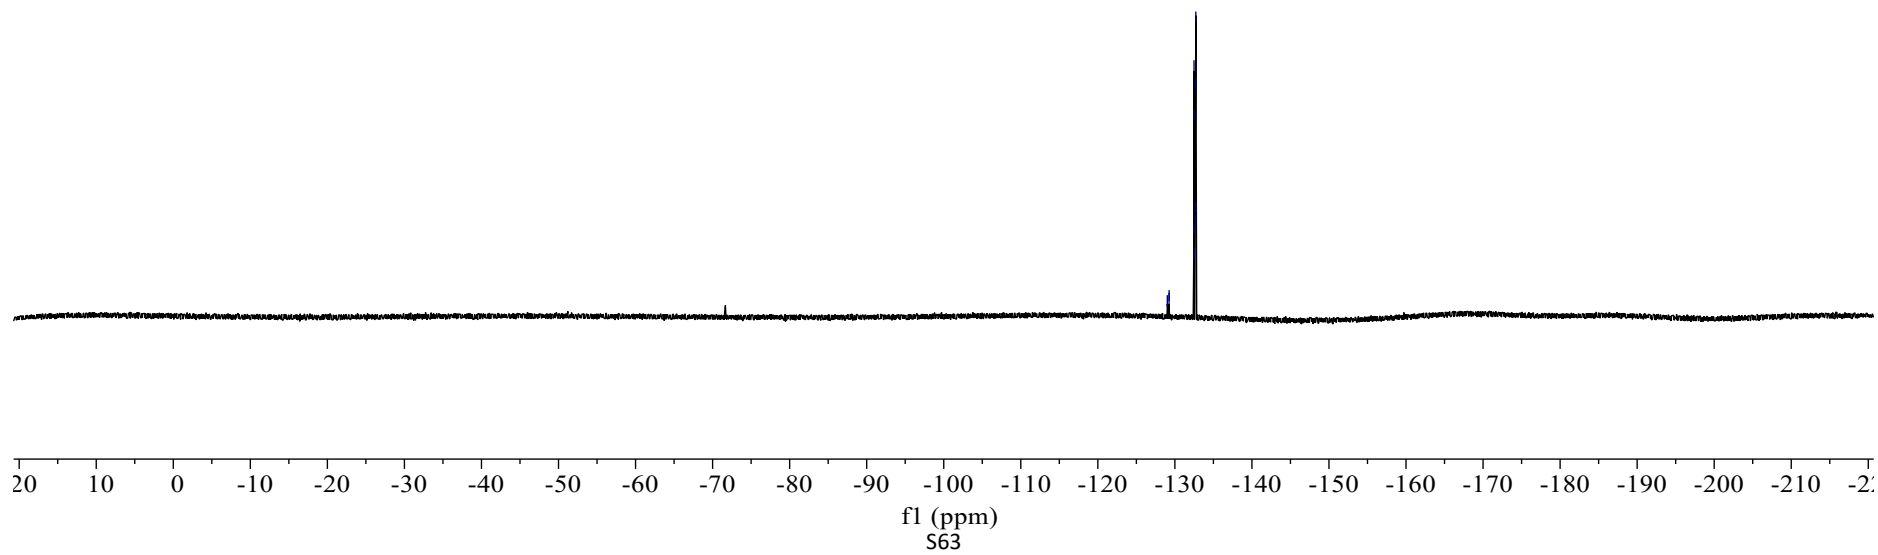

LX-6 #101 RT: 0.76 AV: 1 NL: 2.35E4  
 T: FTMS + p ESI Full ms [100.0000-1500.0000]

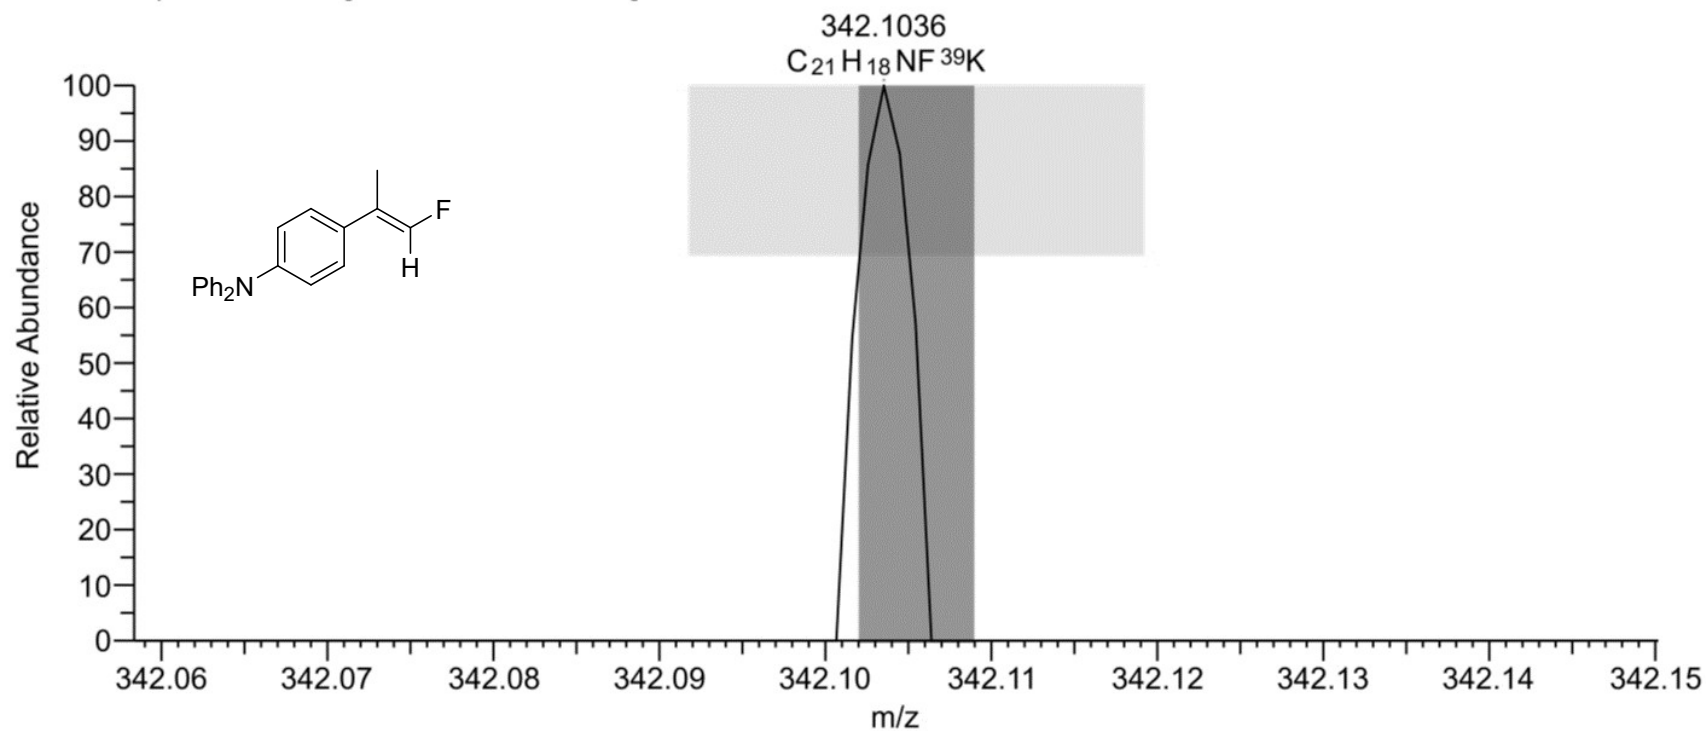

| Peak M...    | Display...                   | S Fit                    | RDB   | Delta [p... | Theo....      | Rank | Combin... | # Matc... | # Misse... | MS Cov... | Pattern... | MSMS...          |
|--------------|------------------------------|--------------------------|-------|-------------|---------------|------|-----------|-----------|------------|-----------|------------|------------------|
| 342.103<br>6 | $C_{21}H_{18}N$<br>$F^{39}K$ | 61.1611<br>703506<br>556 | 12.50 | -5.49       | 342.105<br>49 | 1    | 97.96     | 1         | 0          | 100       | 100        | (Collect<br>ion) |

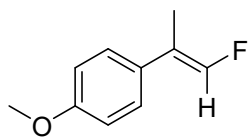

$^1\text{H NMR}$   
(400 MHz,  $\text{CDCl}_3$ )

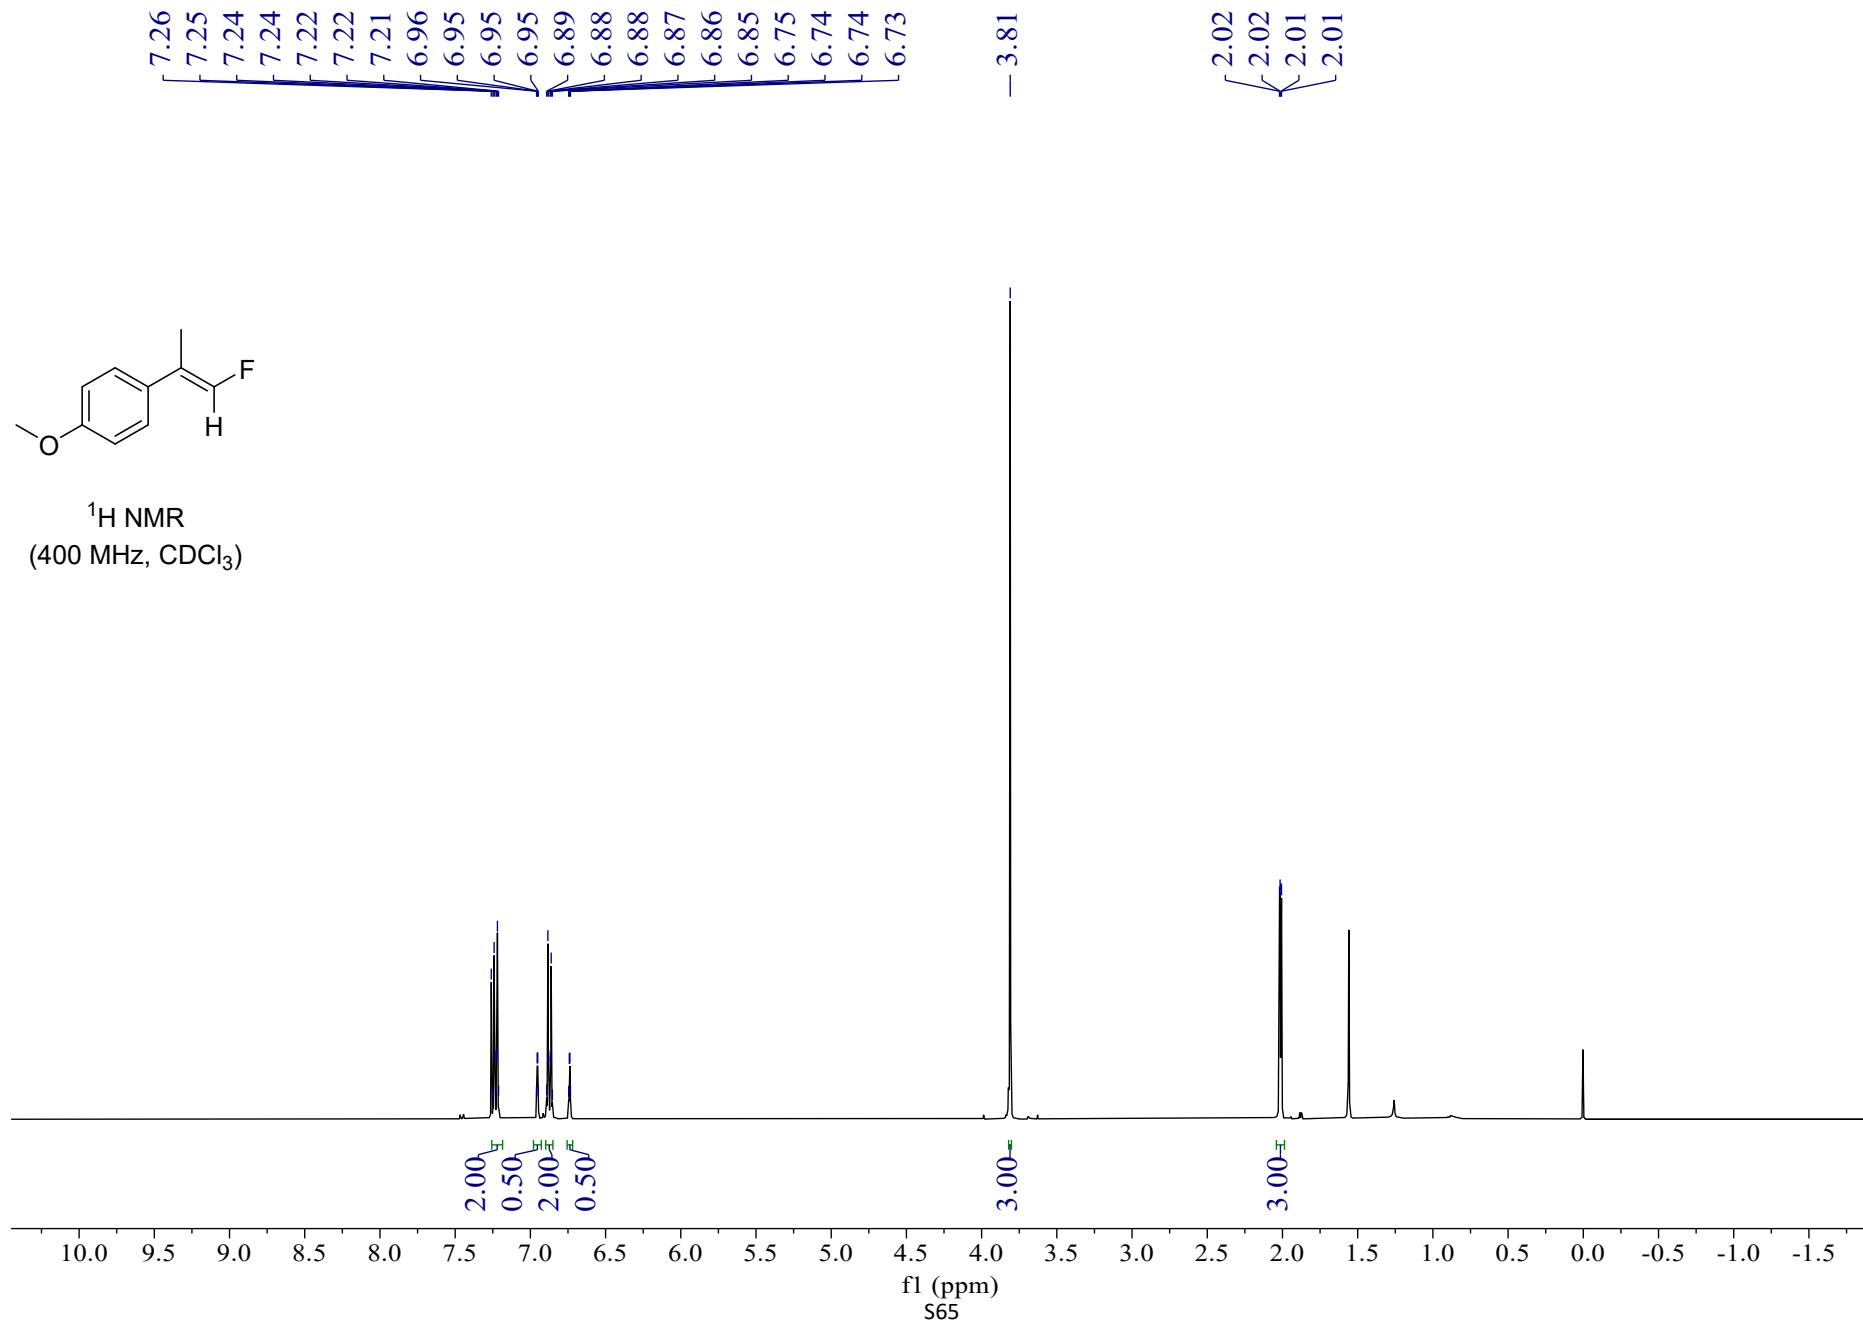

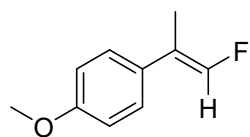

<sup>13</sup>C NMR  
(101 MHz, CDCl<sub>3</sub>)

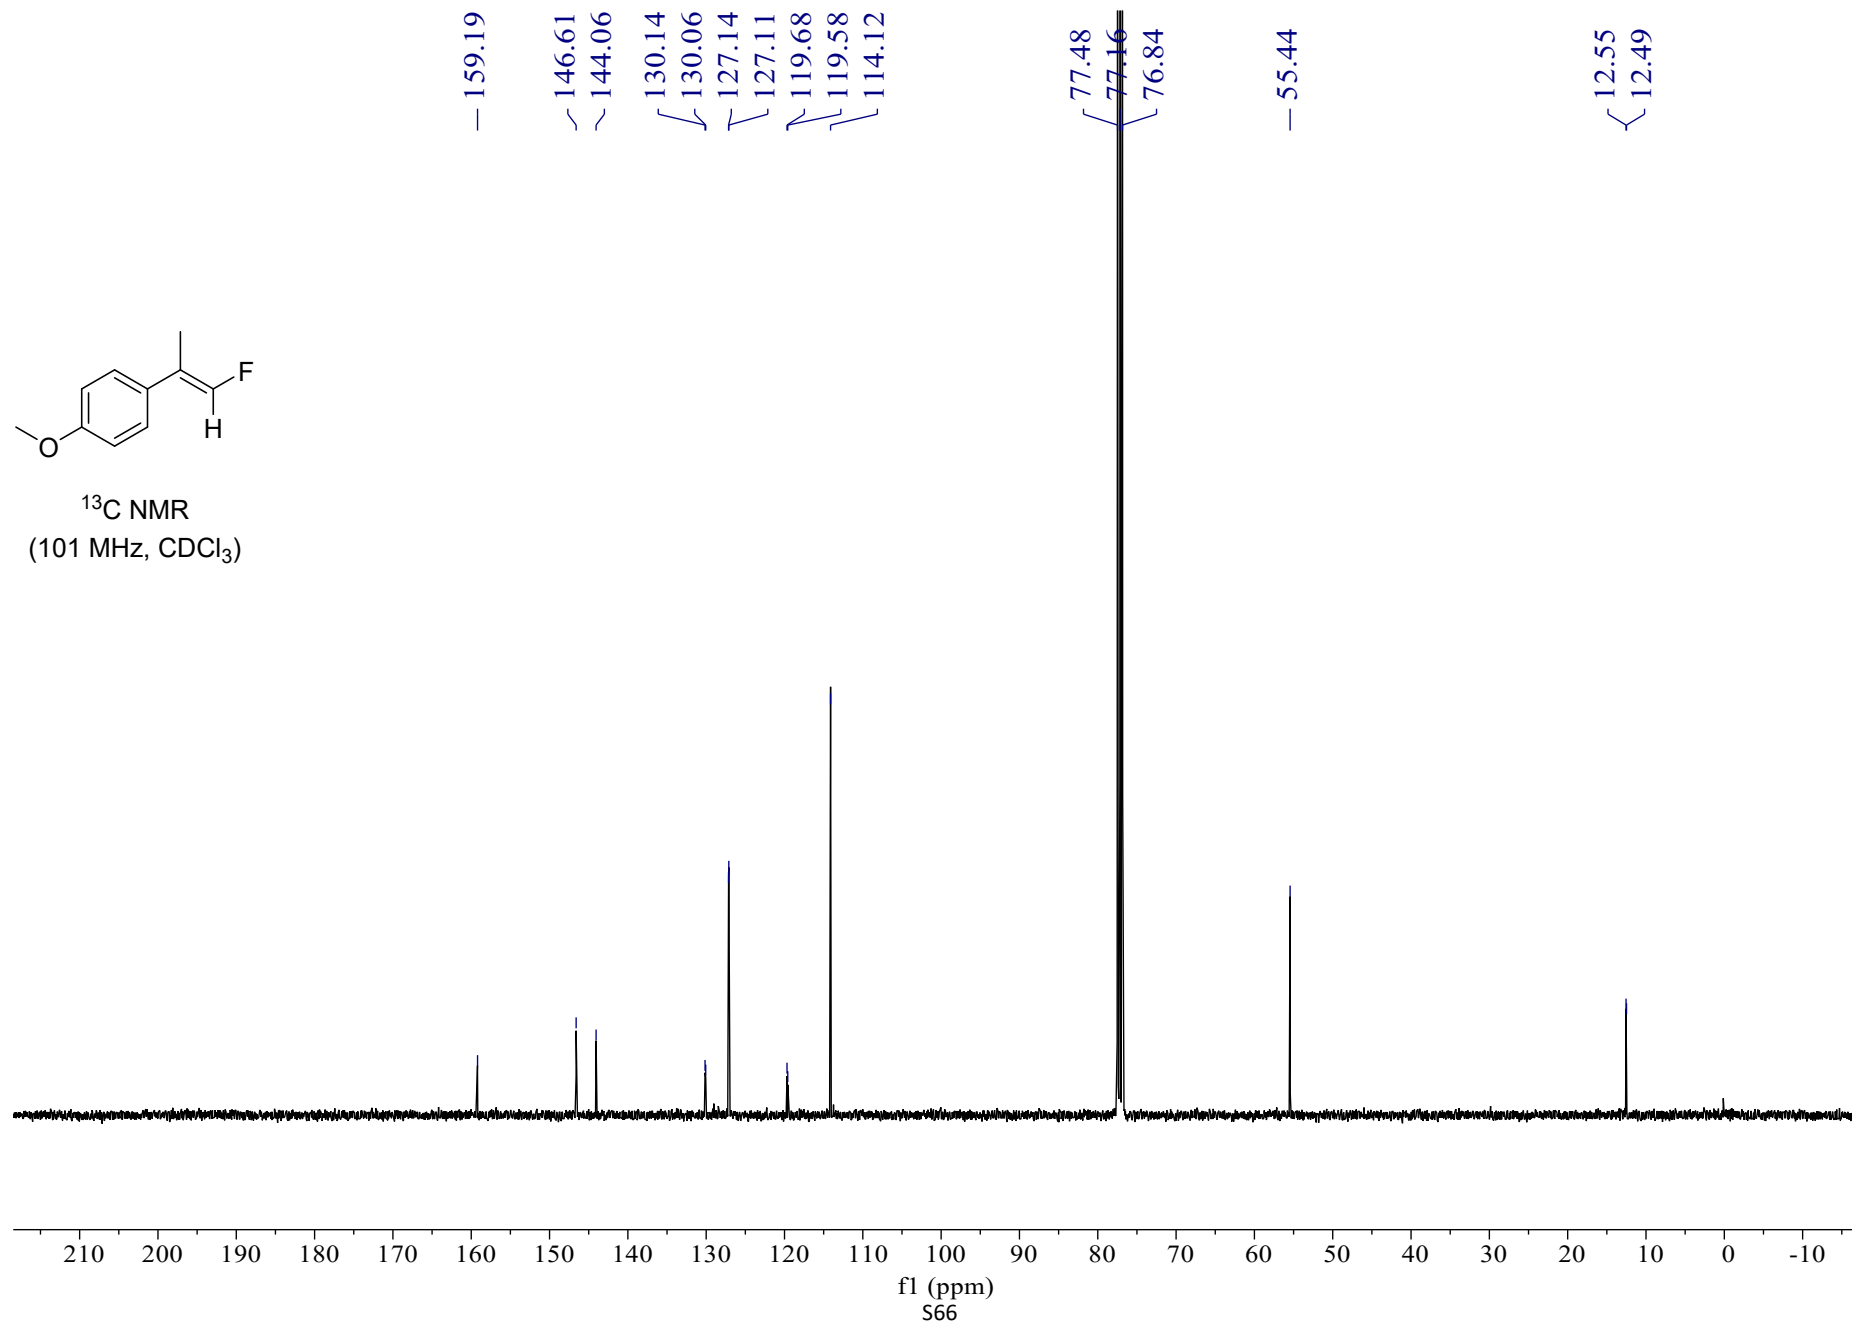

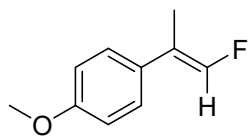

<sup>19</sup>F NMR  
(376 MHz, CDCl<sub>3</sub>)

-130.17  
-130.19  
-130.20  
-130.21  
-130.40  
-130.41  
-130.43  
-130.44  
-132.88  
-132.89  
-132.90  
-132.91  
-133.10  
-133.12  
-133.13  
-133.14

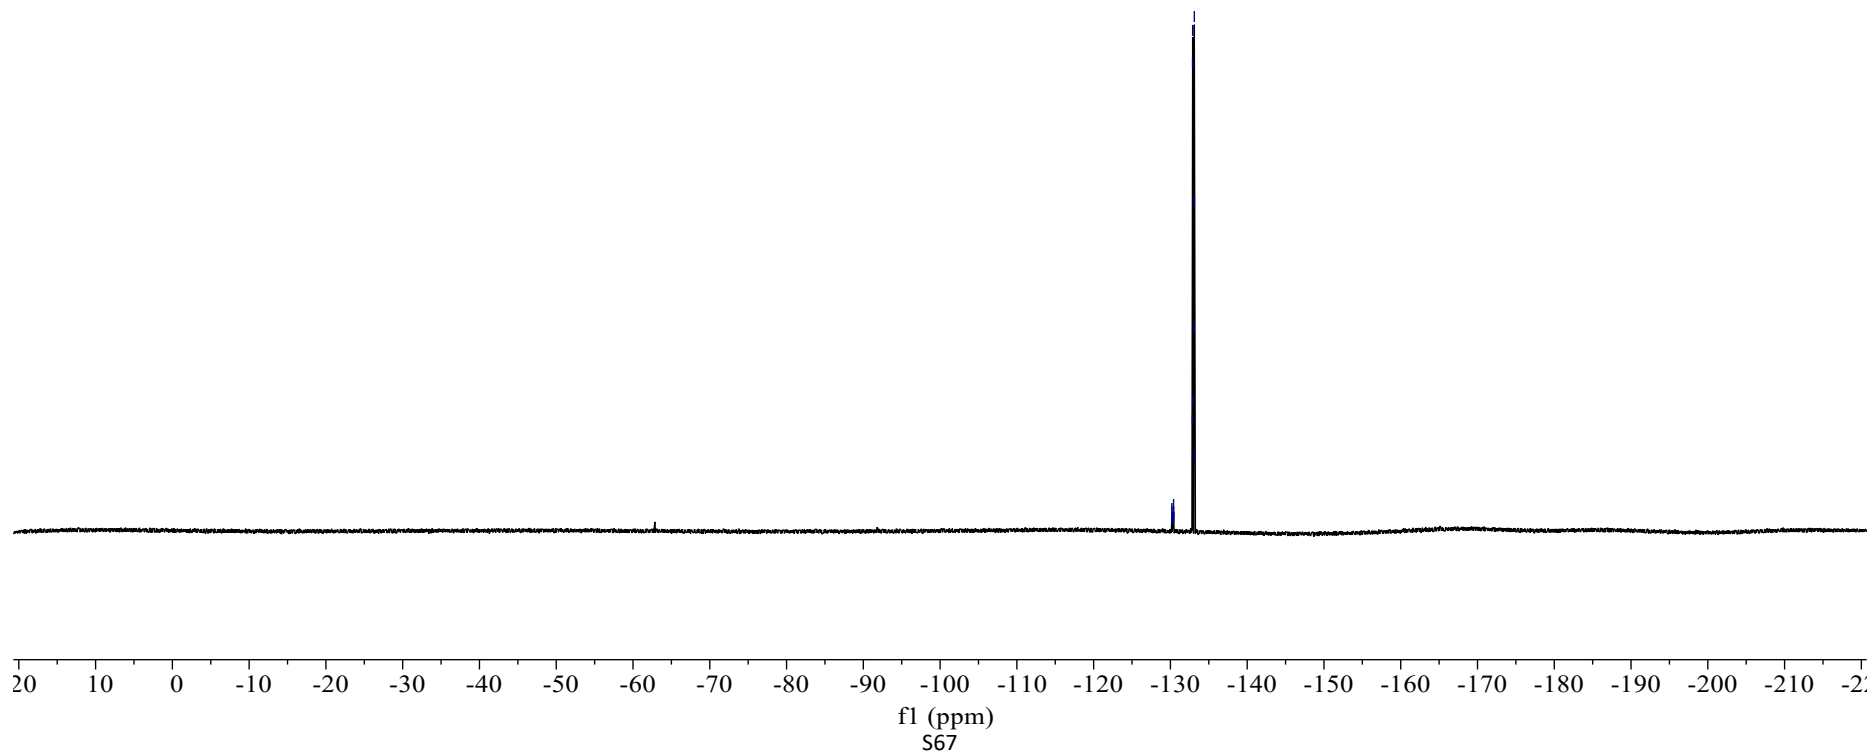

LX-18 #29 RT: 0.21 AV: 1 NL: 3.73E4  
 T: FTMS + p ESI Full ms [100.0000-1500.0000]

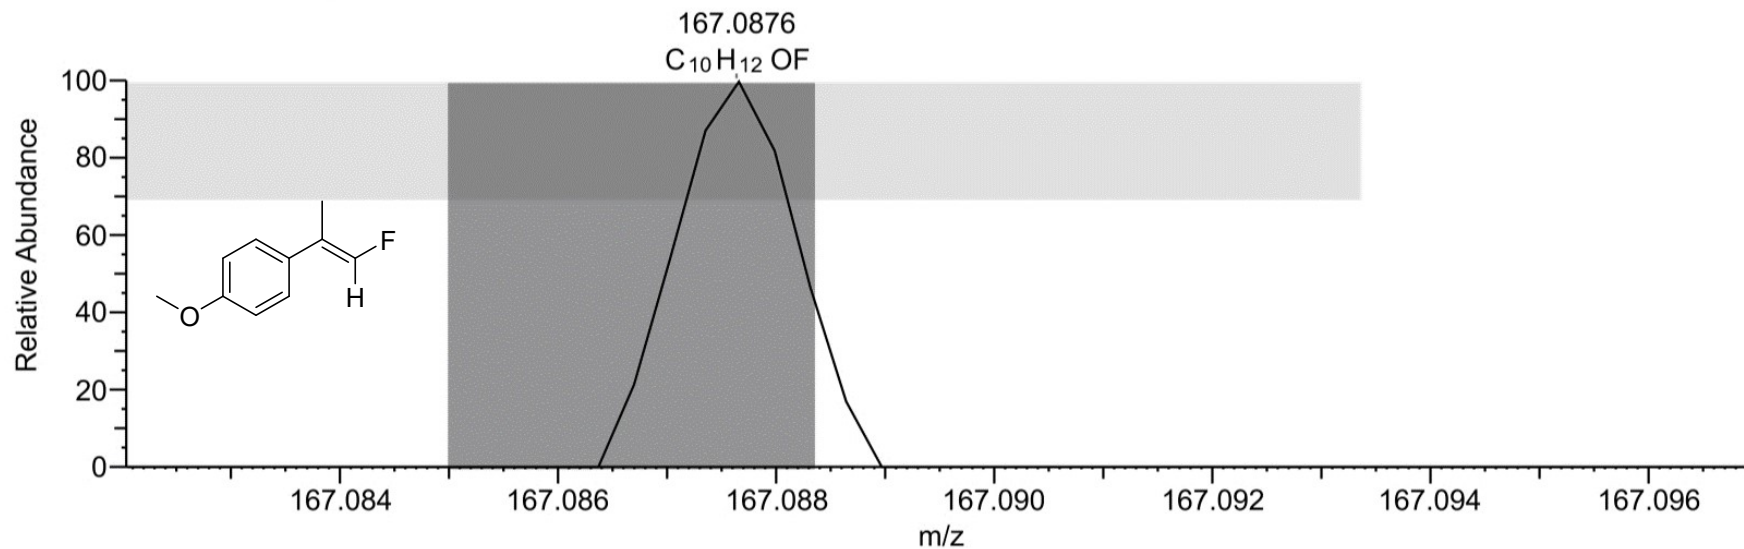

| Peak M...    | Display...           | S Fit                   | RDB  | Delta [p... | Theo....      | Rank | Combin... | # Matc... | # Misse... | MS Cov... | Pattern... | MSMS...          |
|--------------|----------------------|-------------------------|------|-------------|---------------|------|-----------|-----------|------------|-----------|------------|------------------|
| 167.087<br>6 | $C_{10}H_{12}O$<br>F | 58.6652<br>585786<br>61 | 4.50 | 5.85        | 167.086<br>67 | 1    | 97.82     | 1         | 0          | 100       | 100        | (Collect<br>ion) |



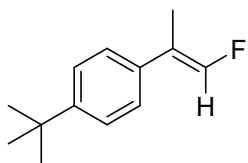

<sup>1</sup>H NMR  
(400 MHz, CDCl<sub>3</sub>)

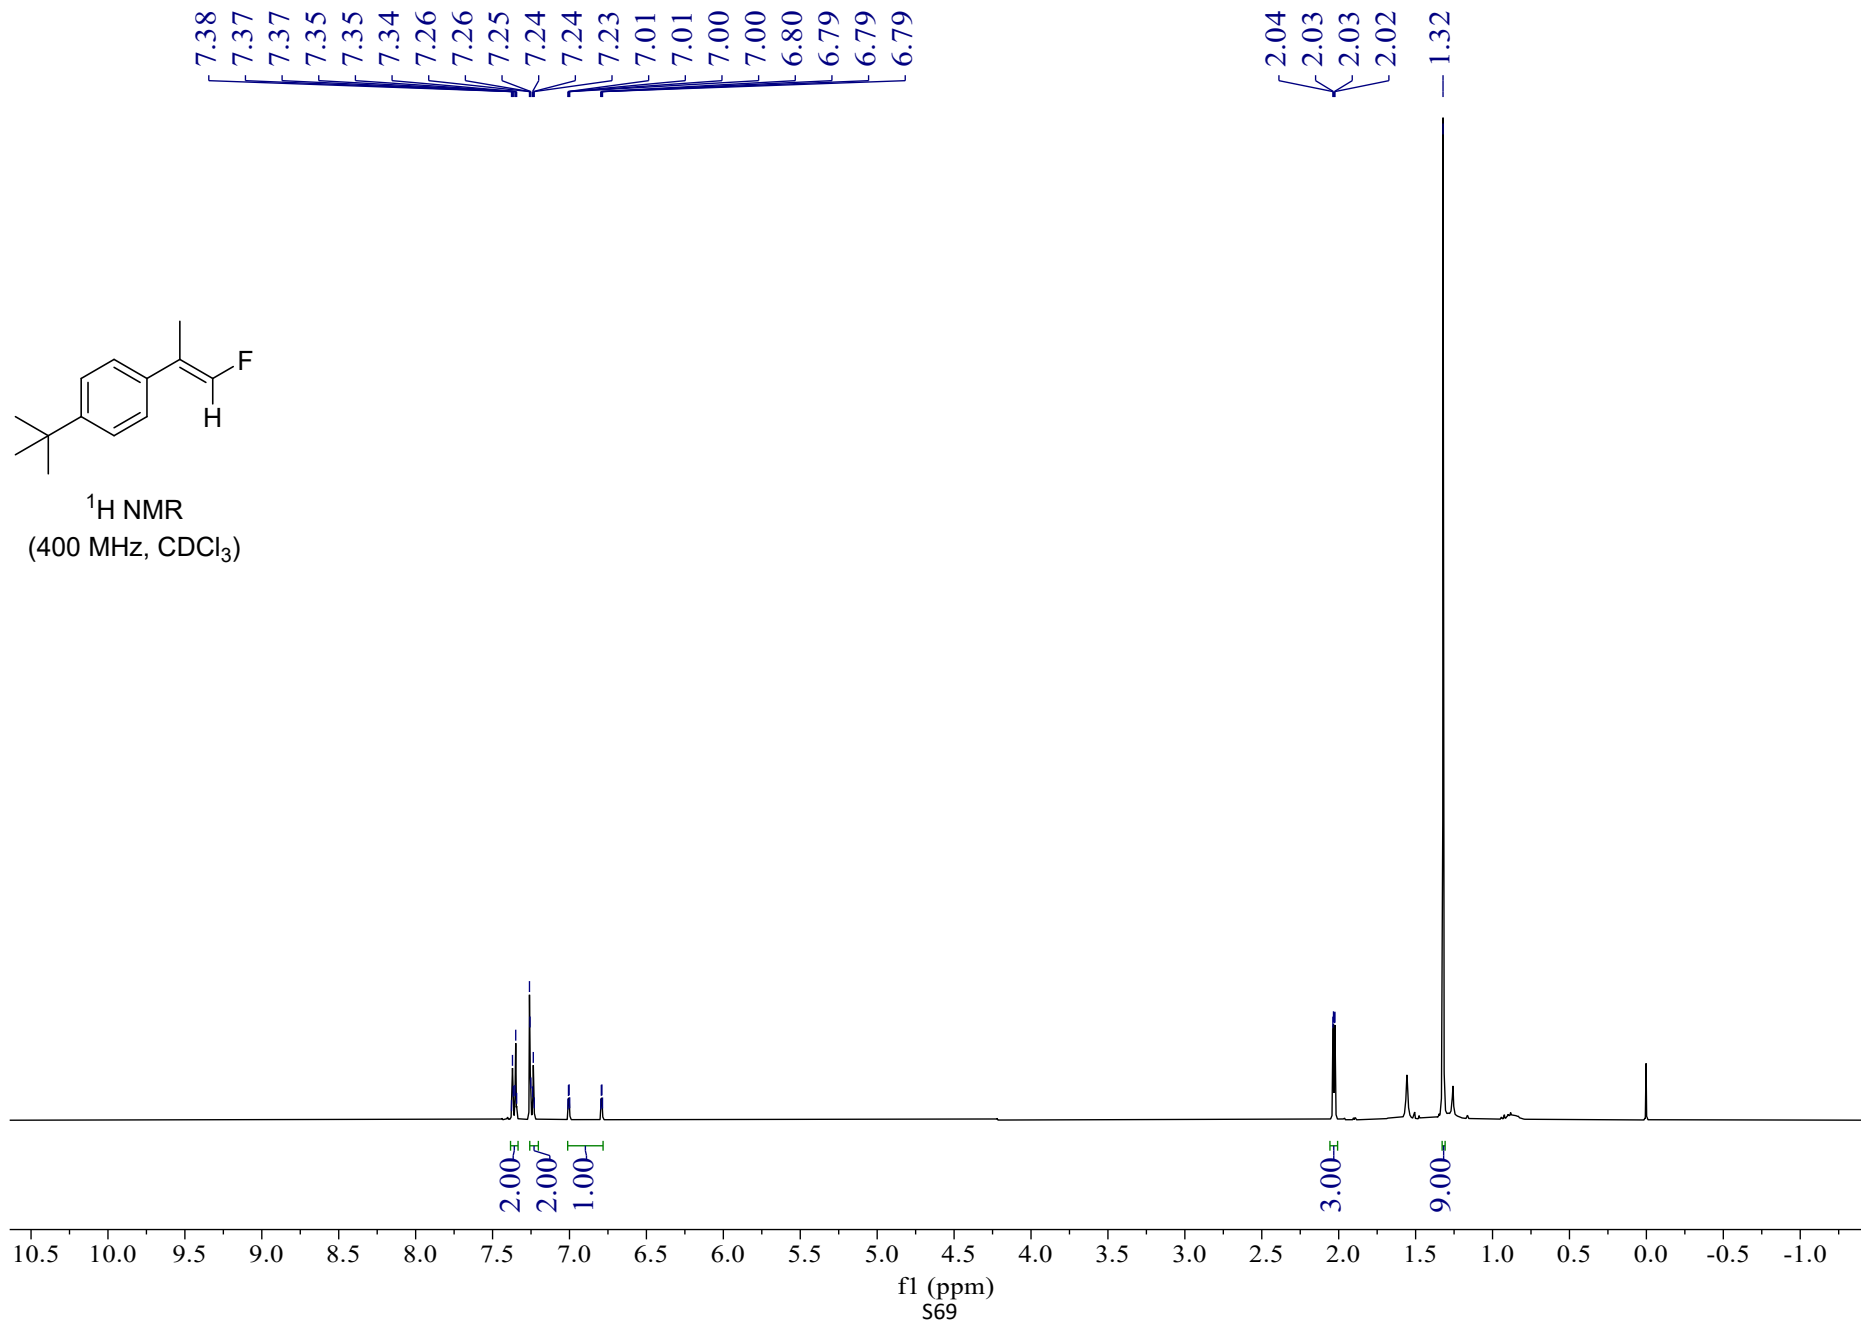

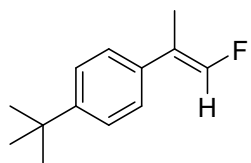

<sup>13</sup>C NMR  
(101 MHz, CDCl<sub>3</sub>)

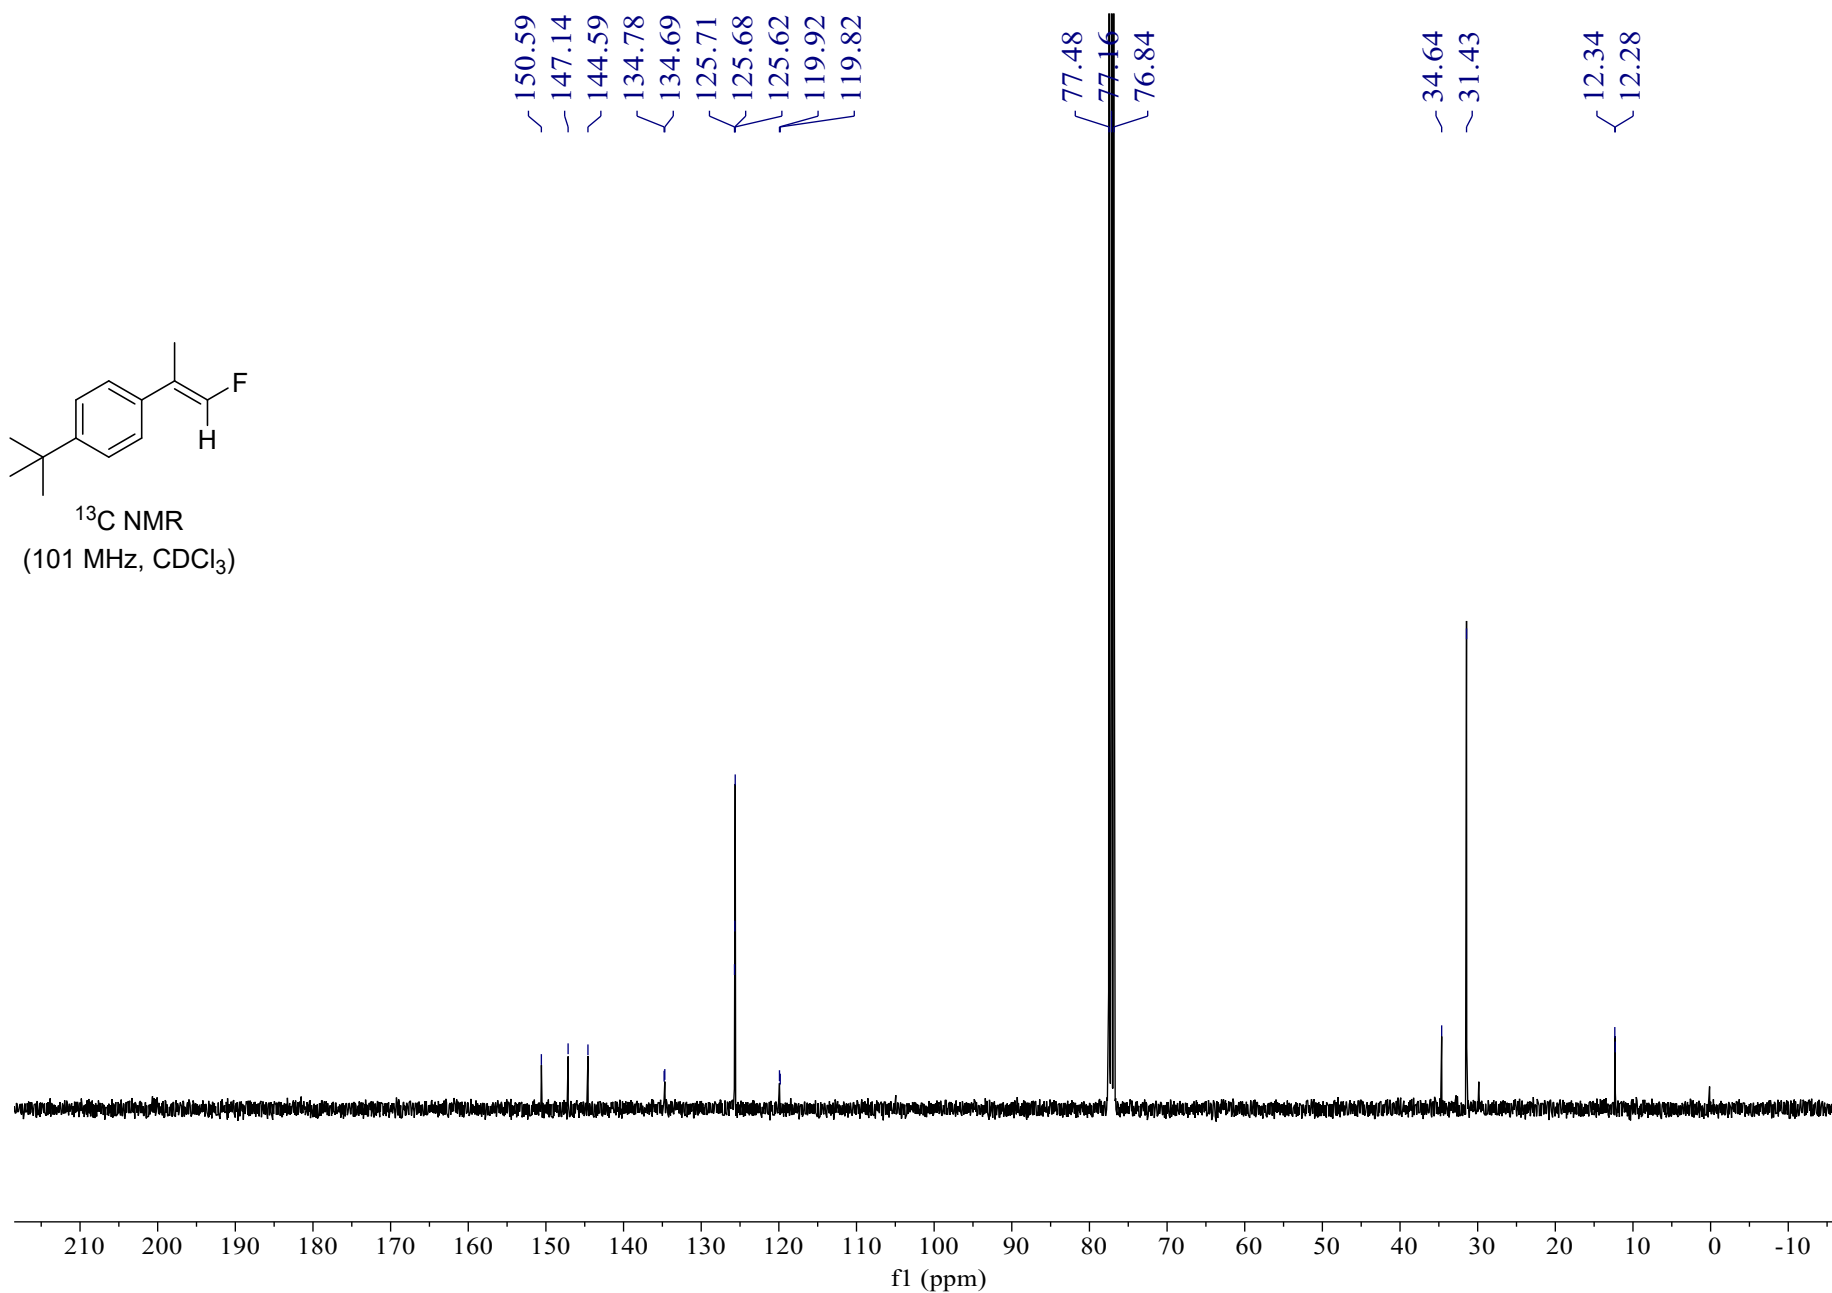

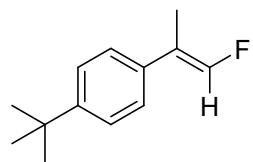

$^{19}\text{F}$  NMR  
(376 MHz,  $\text{CDCl}_3$ )

-132.03  
-132.03  
-132.04  
-132.06  
-132.25  
-132.26  
-132.27  
-132.28

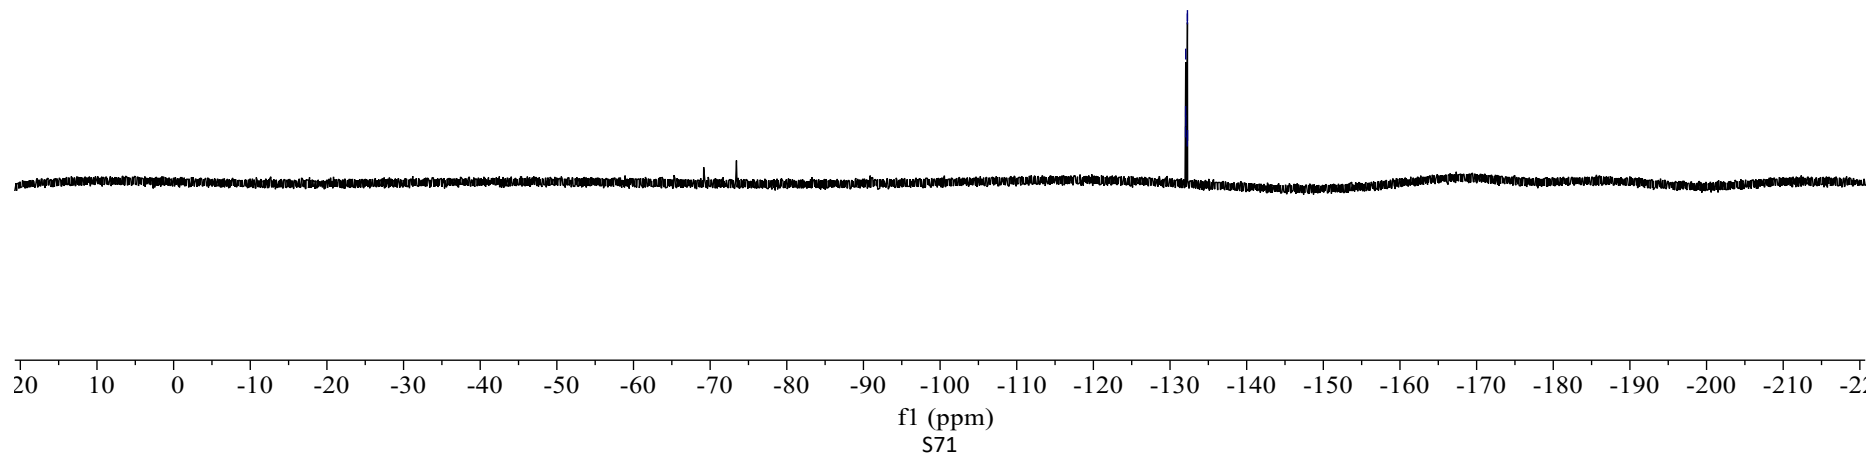

LX-16 #21 RT: 0.15 AV: 1 NL: 4.83E5  
 T: FTMS + p ESI Full ms [100.0000-1500.0000]

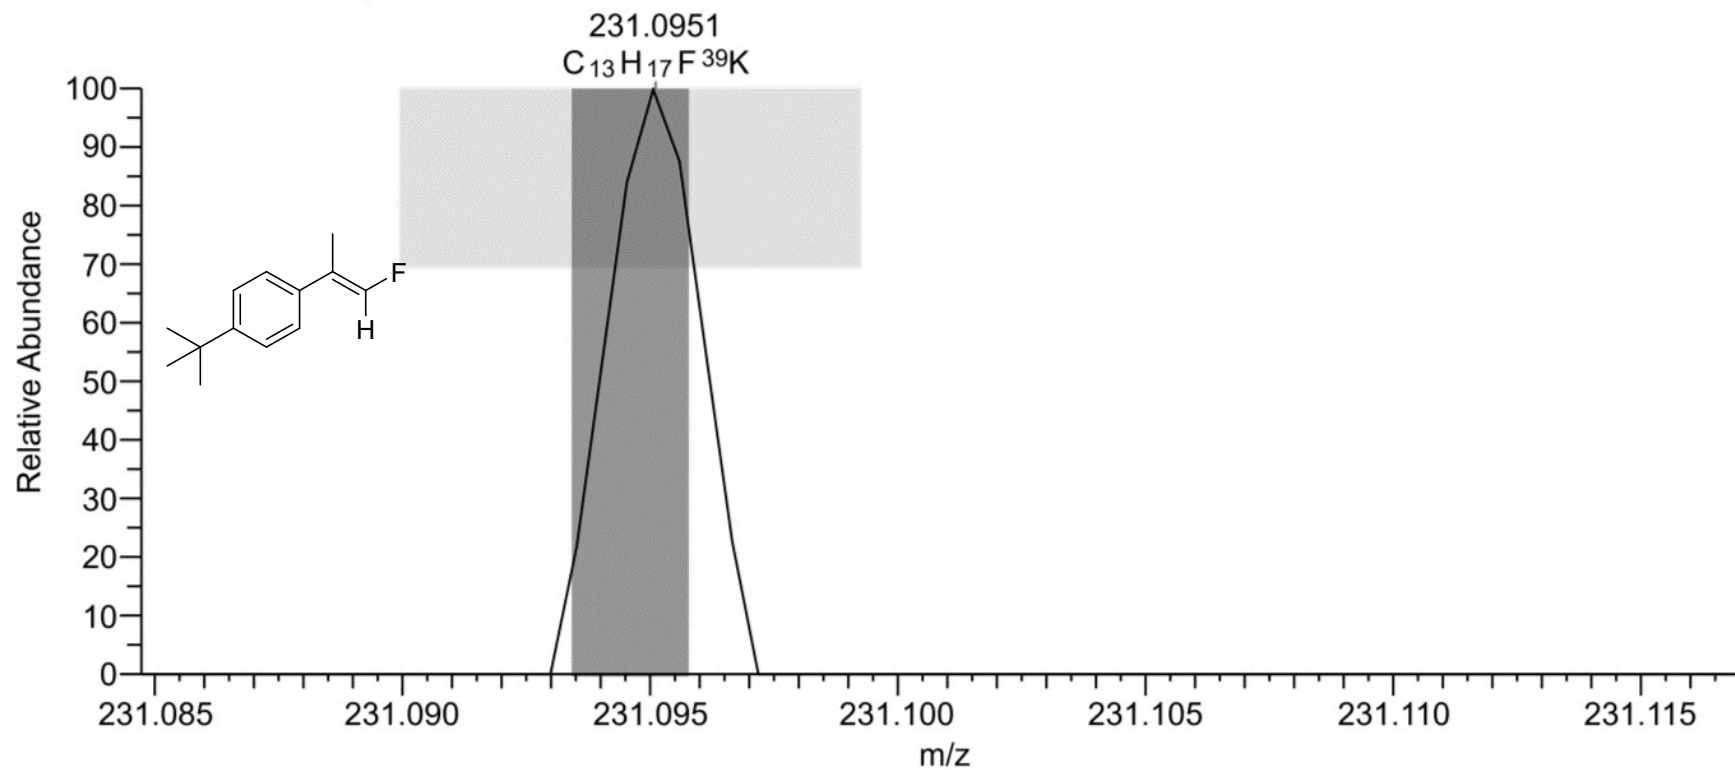

| Peak M...    | Display...                                                       | S Fit                   | RDB  | Delta [p... | Theo....      | Rank | Combin... | # Matc... | # Misse... | MS Cov... | Pattern... | MSMS...          |
|--------------|------------------------------------------------------------------|-------------------------|------|-------------|---------------|------|-----------|-----------|------------|-----------|------------|------------------|
| 231.095<br>1 | C <sub>13</sub> H <sub>17</sub> F <sup>3</sup><br><sup>9</sup> K | 66.2600<br>392930<br>88 | 4.50 | 2.39        | 231.094<br>59 | 1    | 98.22     | 1         | 0          | 100       | 100        | (Collect<br>ion) |

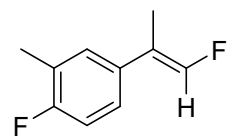

<sup>1</sup>H NMR  
(400 MHz, CD<sub>2</sub>Cl<sub>2</sub>)

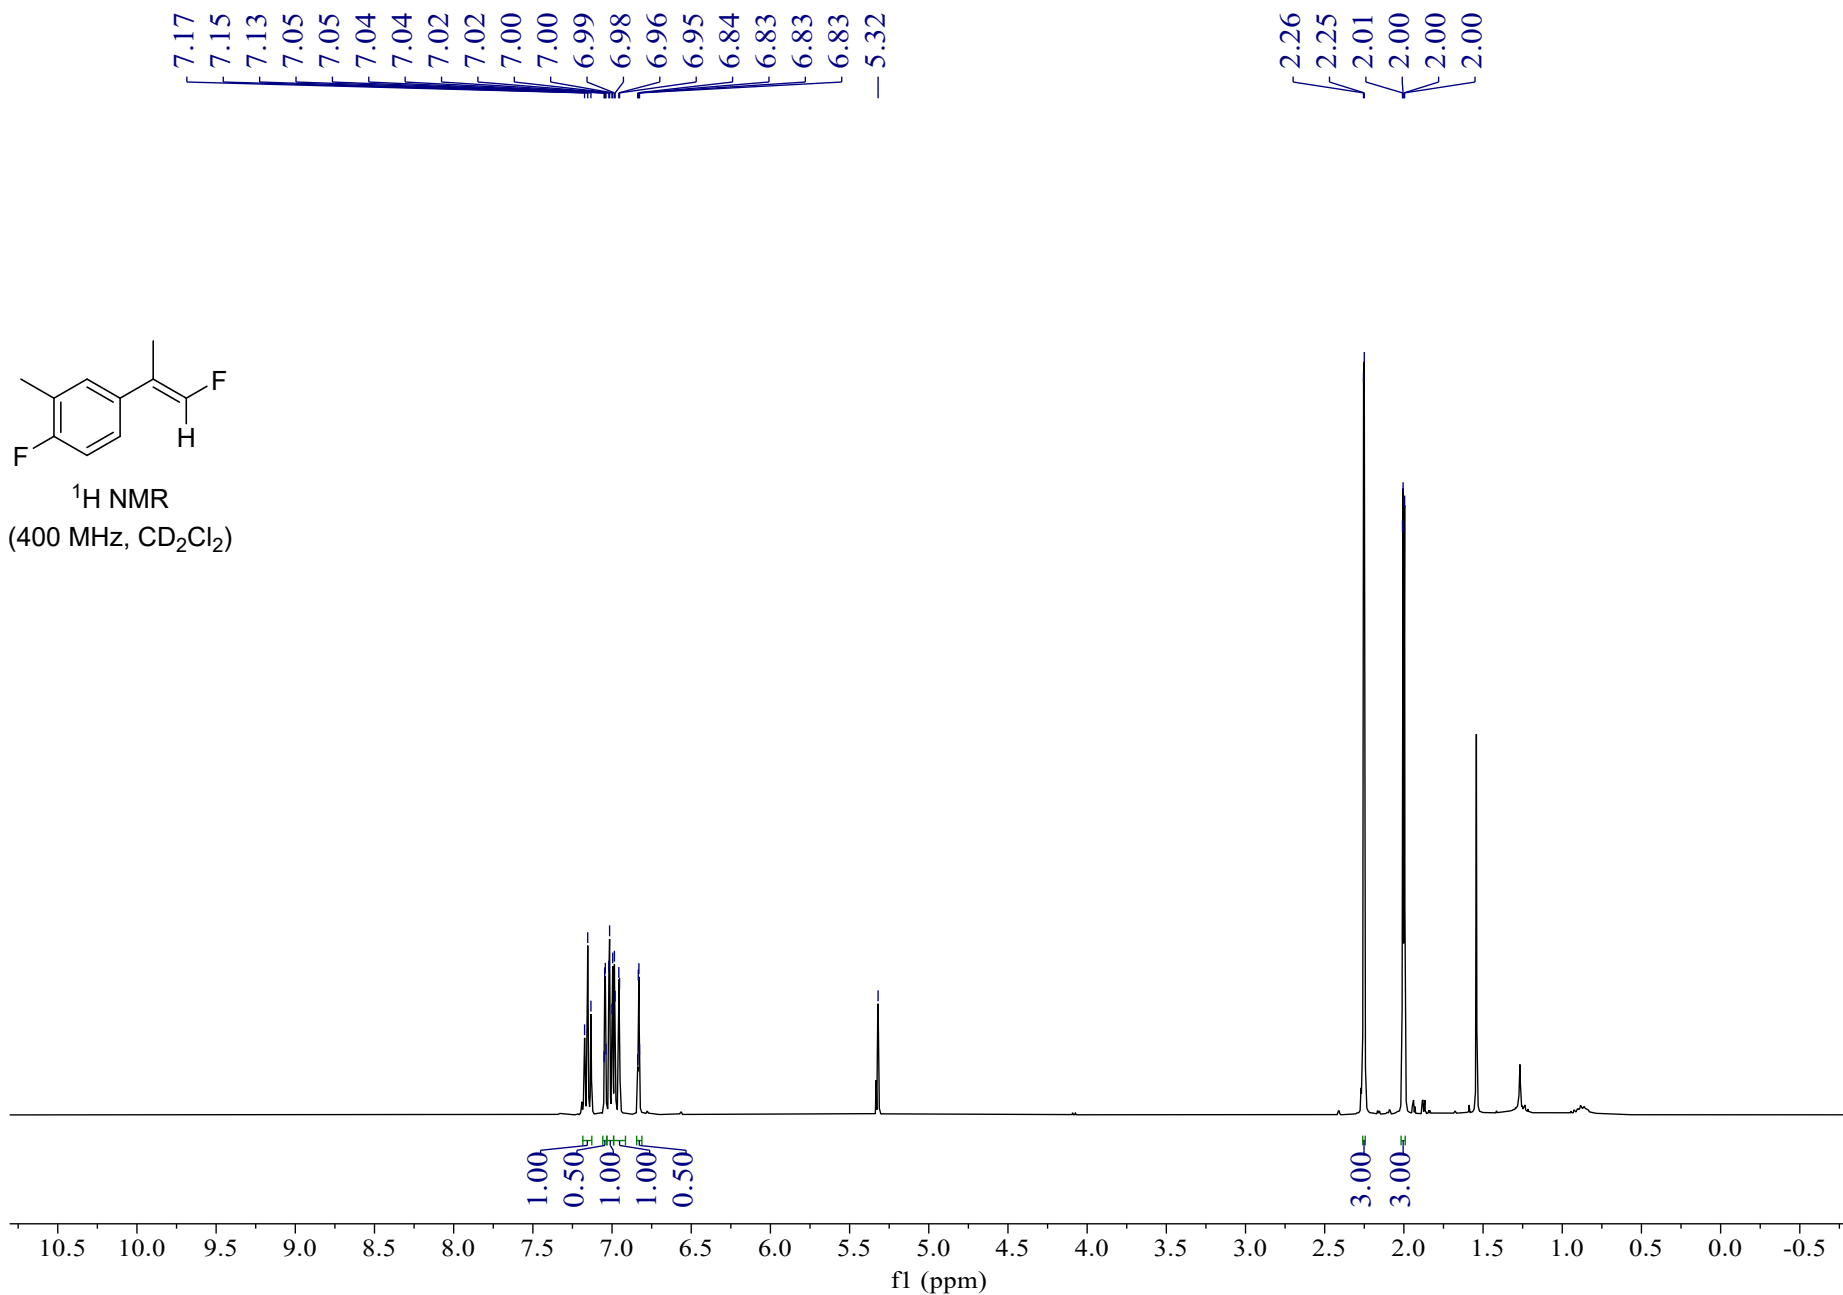

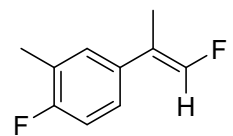

$^{13}\text{C}$  NMR  
(101 MHz,  $\text{CD}_2\text{Cl}_2$ )

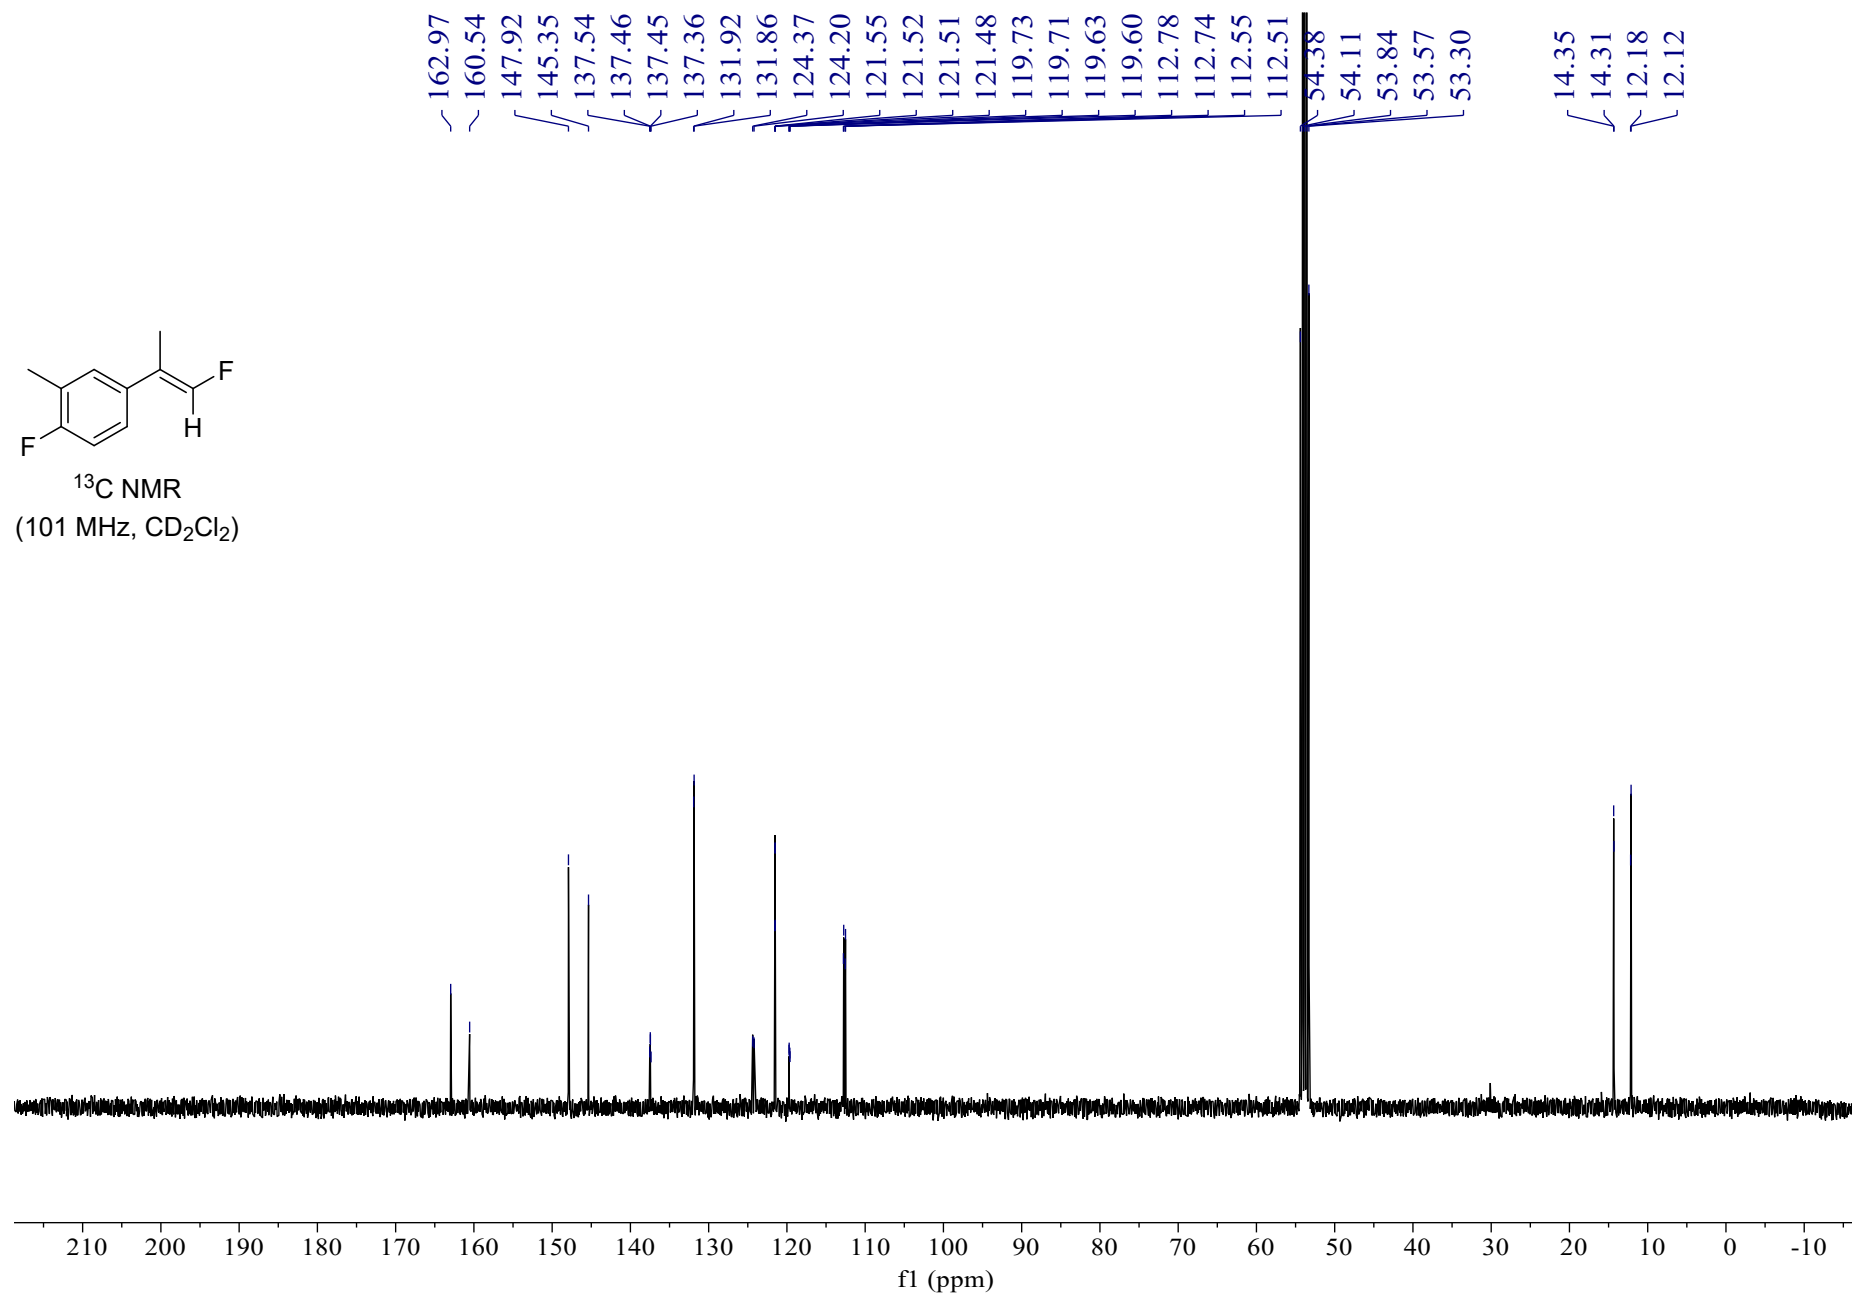

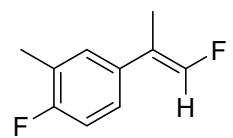

<sup>19</sup>F NMR  
(376 MHz, CD<sub>2</sub>Cl<sub>2</sub>)

-118.19  
-118.20  
-118.22  
-118.23  
-118.25  
-118.26  
-128.19  
-128.20  
-128.21  
-128.23  
-128.41  
-128.43  
-128.44  
-128.45  
-131.61  
-131.62  
-131.63  
-131.64  
-131.83  
-131.84  
-131.85  
-131.86

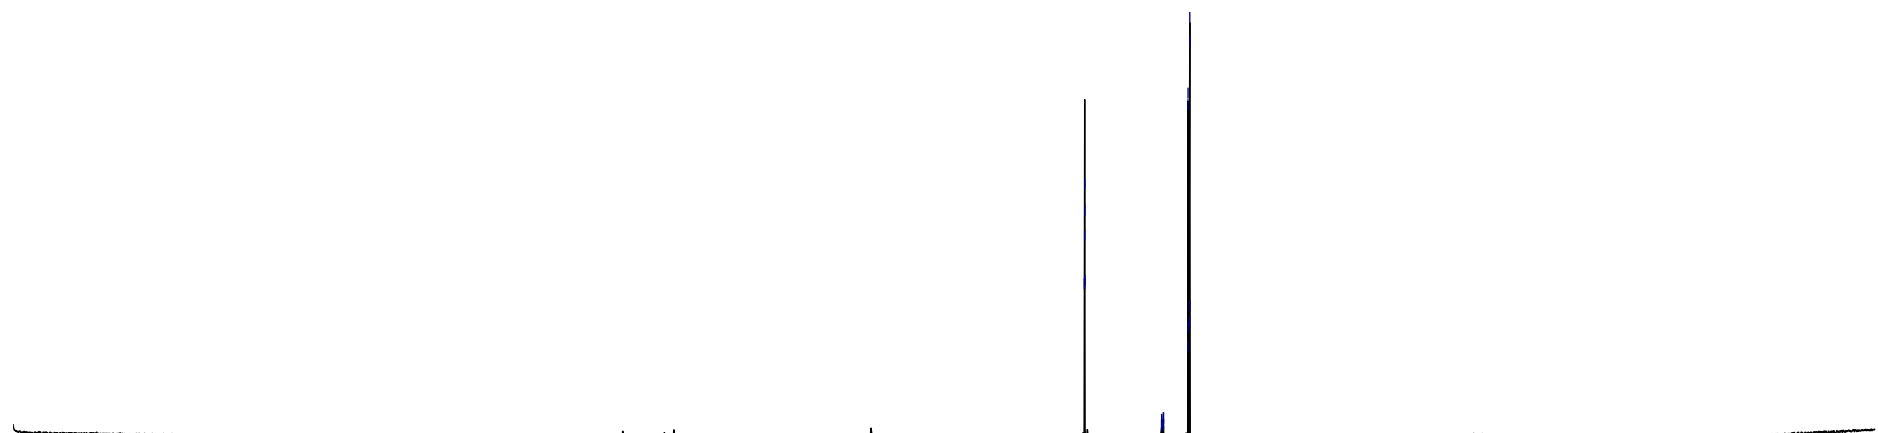

20 10 0 -10 -20 -30 -40 -50 -60 -70 -80 -90 -100 -110 -120 -130 -140 -150 -160 -170 -180 -190 -200 -210 -220  
f1 (ppm)  
S75

LX-7 #101 RT: 0.76 AV: 1 NL: 2.19E4  
 T: FTMS + p ESI Full ms [100.0000-1500.0000]

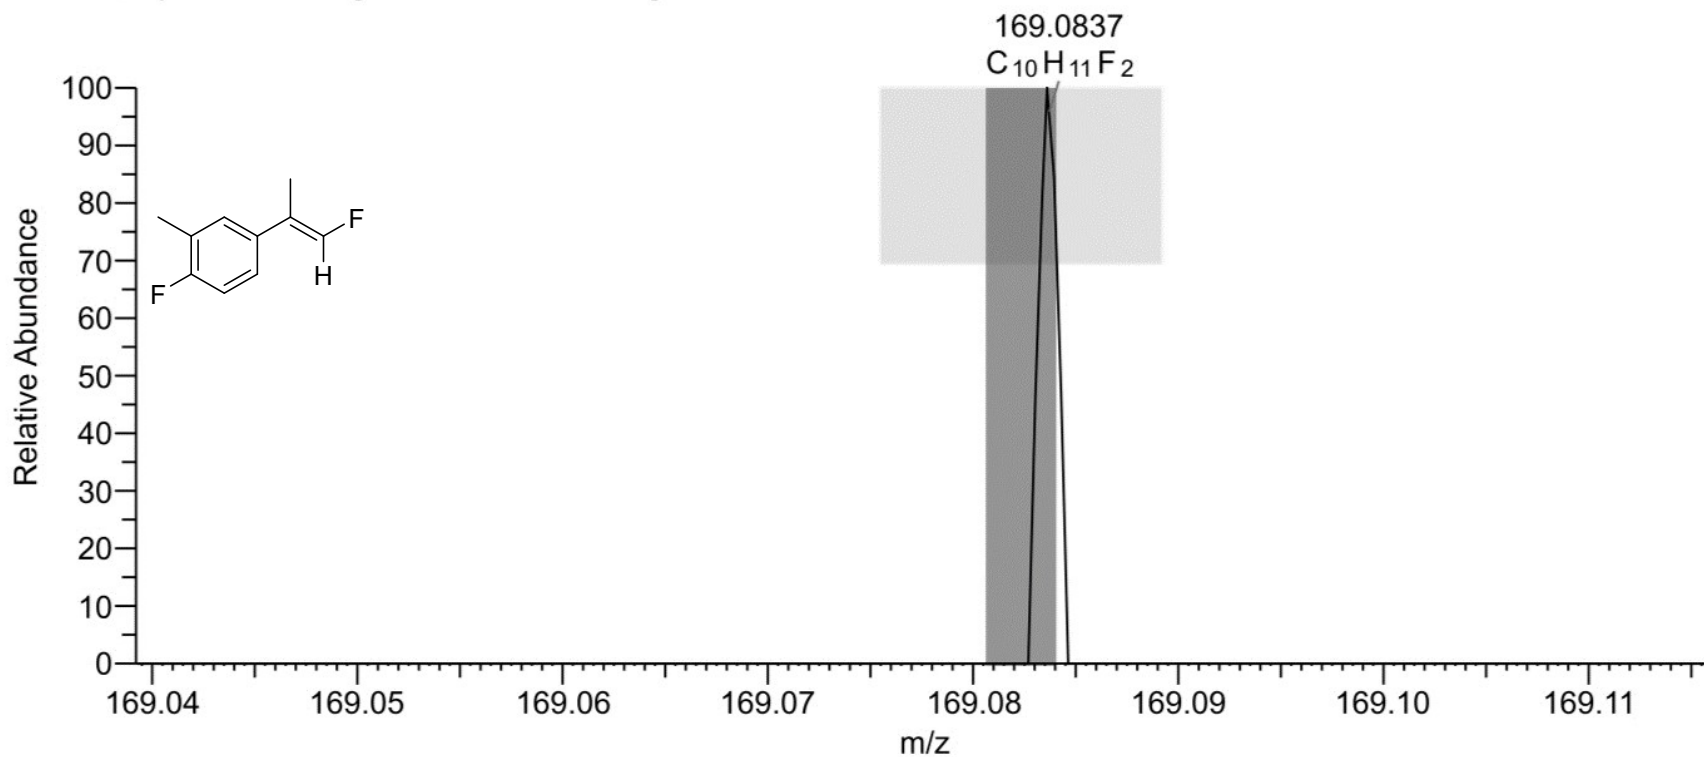

| Peak M...    | Display...        | S Fit                    | RDB  | Delta [p... | Theo....      | Rank | Combin... | # Matc... | # Misse... | MS Cov... | Pattern... | MSMS...          |
|--------------|-------------------|--------------------------|------|-------------|---------------|------|-----------|-----------|------------|-----------|------------|------------------|
| 169.083<br>7 | $C_{10}H_{11}F_2$ | 41.8010<br>142493<br>117 | 4.50 | 8.23        | 169.082<br>33 | 1    | 96.94     | 1         | 0          | 100       | 100        | (Collect<br>ion) |



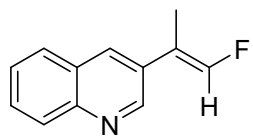

<sup>1</sup>H NMR  
(400 MHz, CDCl<sub>3</sub>)

8.90  
8.90  
8.10  
8.08  
8.01  
8.01  
7.82  
7.80  
7.71  
7.71  
7.70  
7.69  
7.69  
7.67  
7.67  
7.57  
7.57  
7.56  
7.55  
7.55  
7.53  
7.53  
7.26  
6.99  
6.98  
6.98  
6.98  
2.17  
2.16  
2.16  
2.15

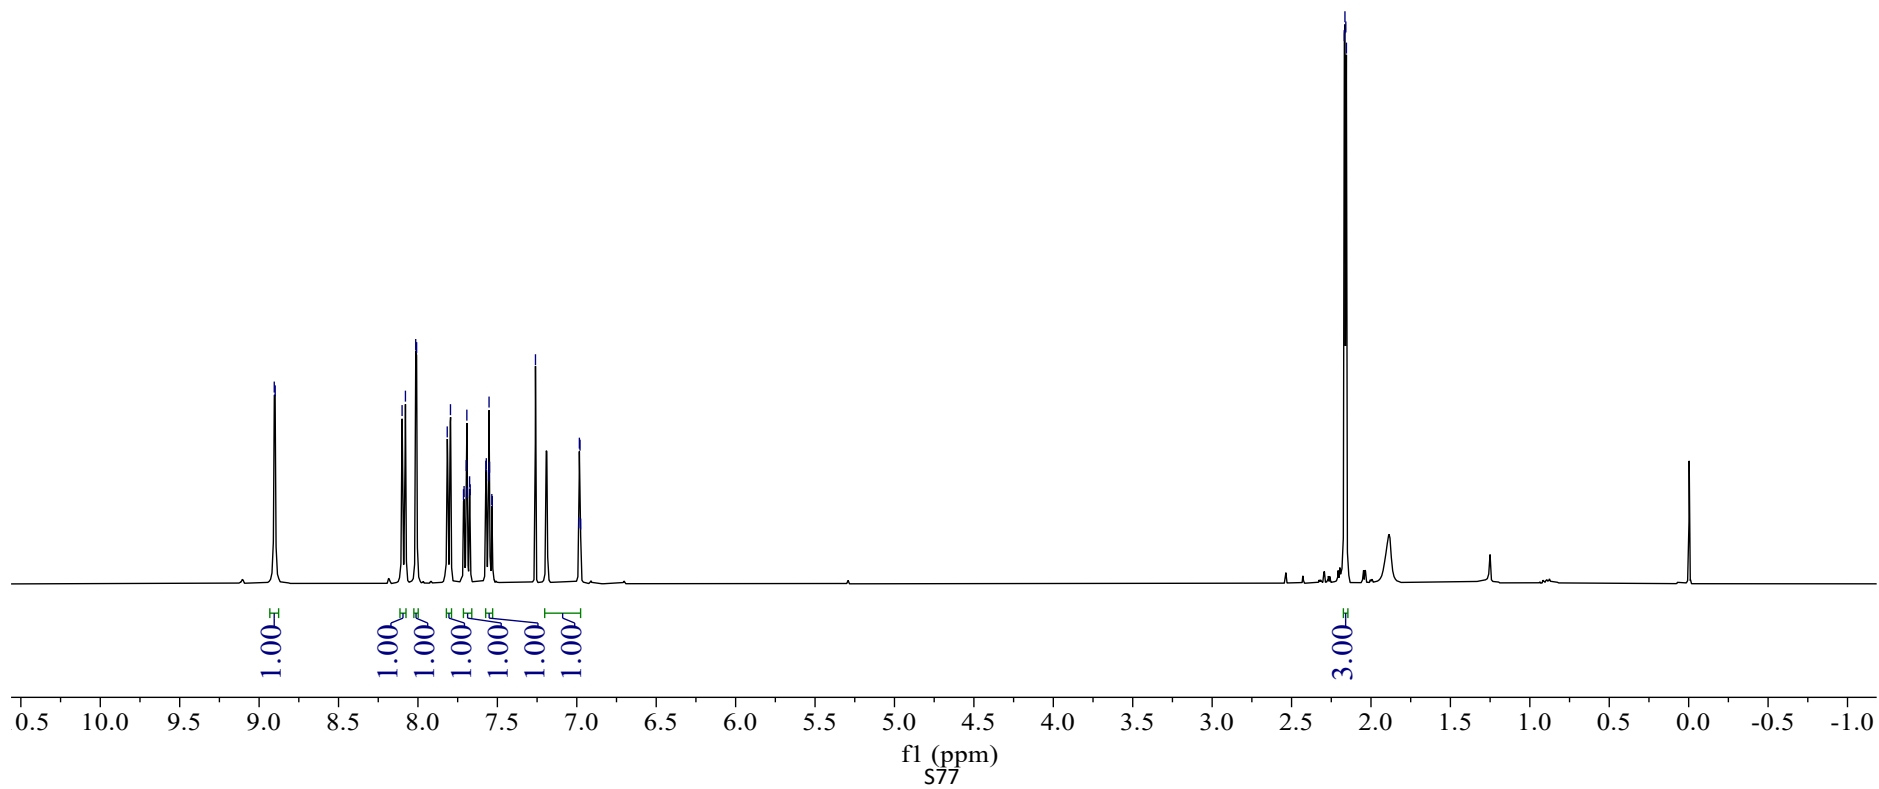

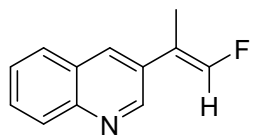

<sup>13</sup>C NMR  
(101 MHz, CDCl<sub>3</sub>)

148.55  
148.53  
148.36  
147.48  
145.76  
132.37  
132.32  
130.65  
130.56  
129.47  
129.32  
127.98  
127.87  
127.22  
117.78  
117.67

77.48  
77.16  
76.84

12.21  
12.15

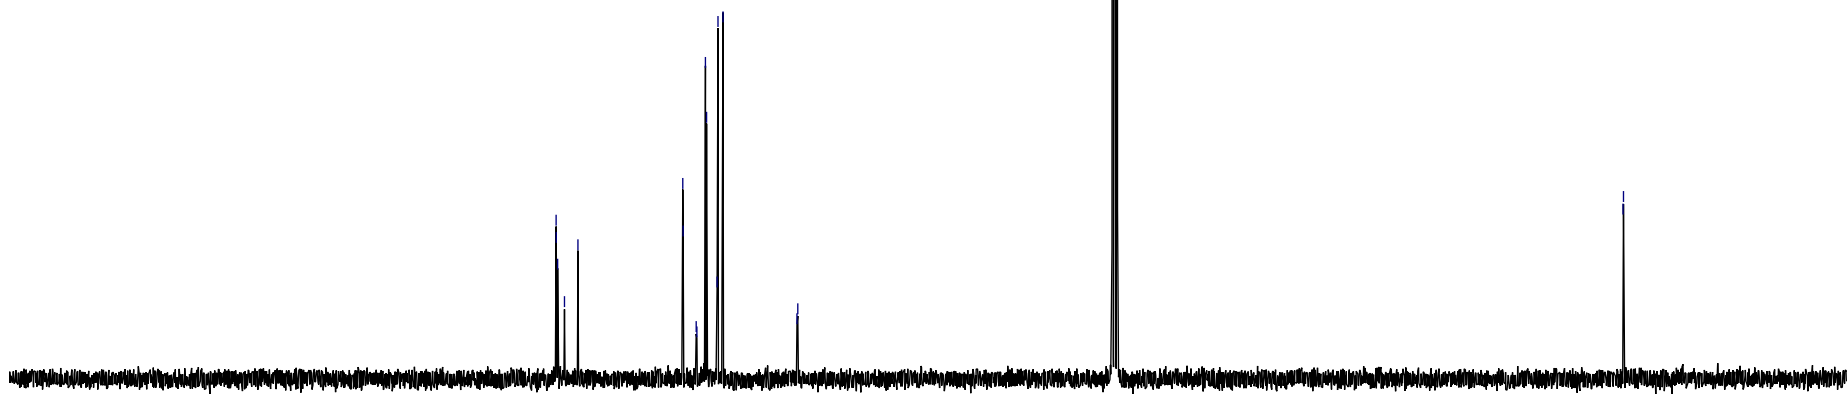

210 200 190 180 170 160 150 140 130 120 110 100 90 80 70 60 50 40 30 20 10 0 -10

f1 (ppm)  
S78

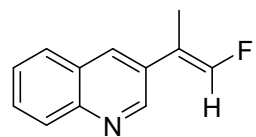

<sup>19</sup>F NMR  
(376 MHz, CDCl<sub>3</sub>)

-126.94  
-126.95  
-126.97  
-126.98  
-127.17  
-127.18  
-127.19  
-127.20

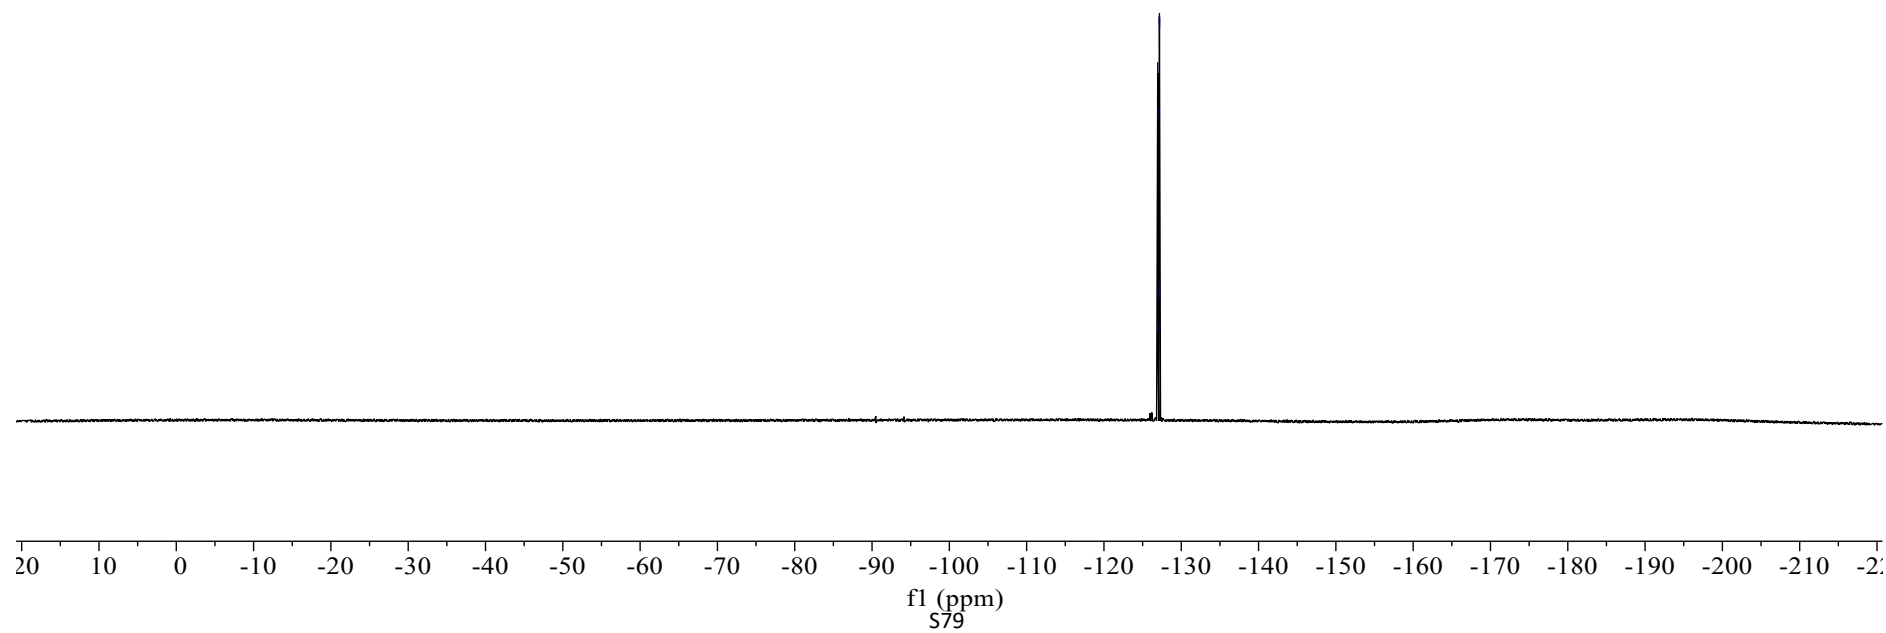

LX-9 #15 RT: 0.11 AV: 1 NL: 2.64E9  
 T: FTMS + p ESI Full ms [100.0000-1500.0000]

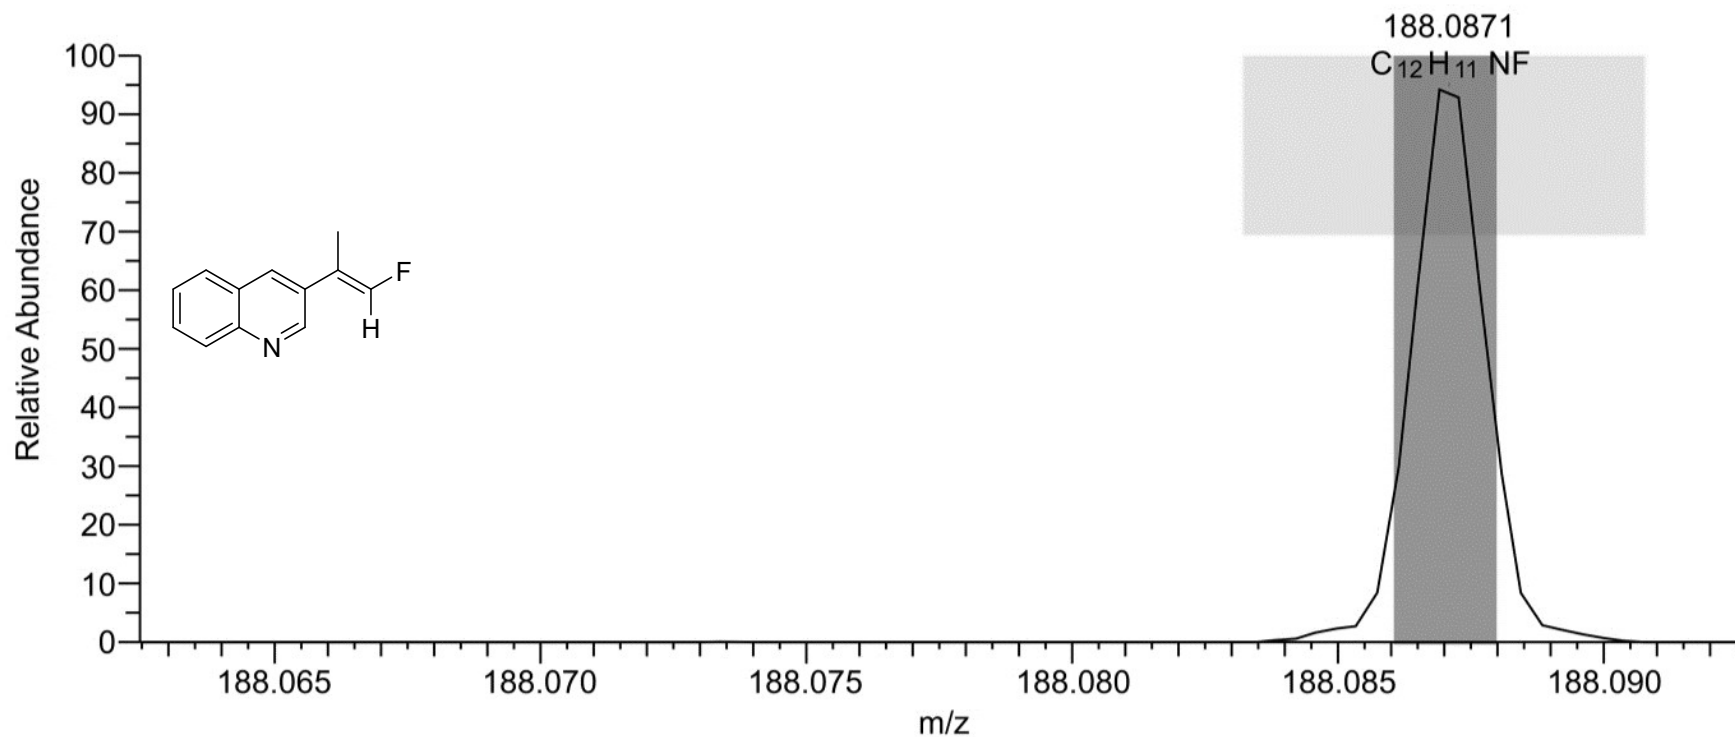

| Peak M...    | Display...                             | S Fit                    | RDB  | Delta [p... | Theo....      | Rank | Combin... | # Matc... | # Misse... | MS Cov... | Pattern... | MSMS...          |
|--------------|----------------------------------------|--------------------------|------|-------------|---------------|------|-----------|-----------|------------|-----------|------------|------------------|
| 188.087<br>1 | C <sub>12</sub> H <sub>11</sub> N<br>F | 35.3235<br>071921<br>837 | 7.50 | 0.49        | 188.087<br>00 | 1    | 96.02     | 4         | 1          | 99.39     | 99.57      | (Collect<br>ion) |

7.60  
7.58  
7.32  
7.30  
7.26  
7.26  
7.25  
7.25  
7.24  
7.24  
7.23  
7.23  
7.22  
7.21  
7.21  
7.14  
7.14  
7.14  
7.12  
7.12  
7.12  
7.12  
7.10  
7.10  
7.10  
6.91  
6.91  
6.90  
6.90  
6.70  
6.70  
6.69  
6.69  
6.69  
6.40  
3.70  
2.07  
2.07  
2.06  
2.06

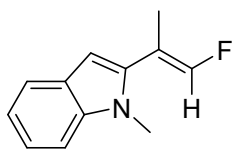

<sup>1</sup>H NMR  
(400 MHz, CDCl<sub>3</sub>)

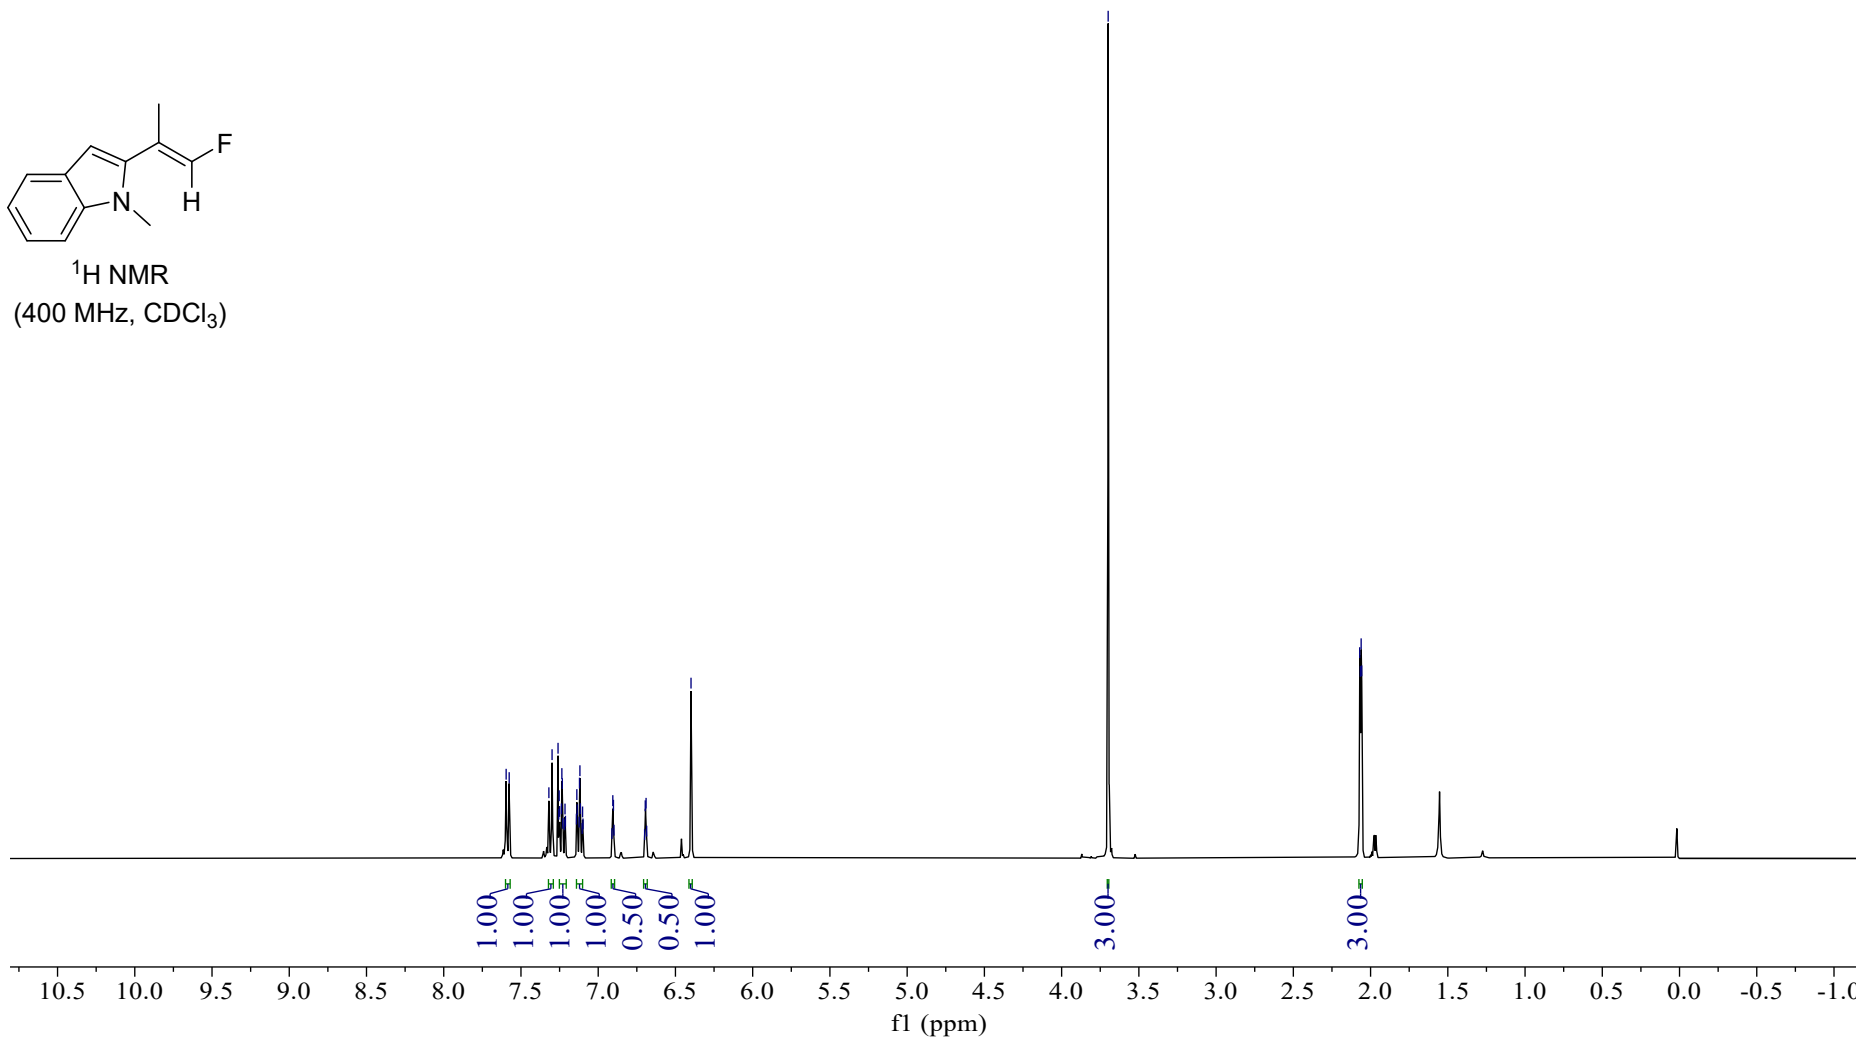

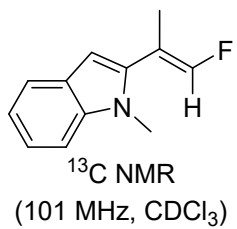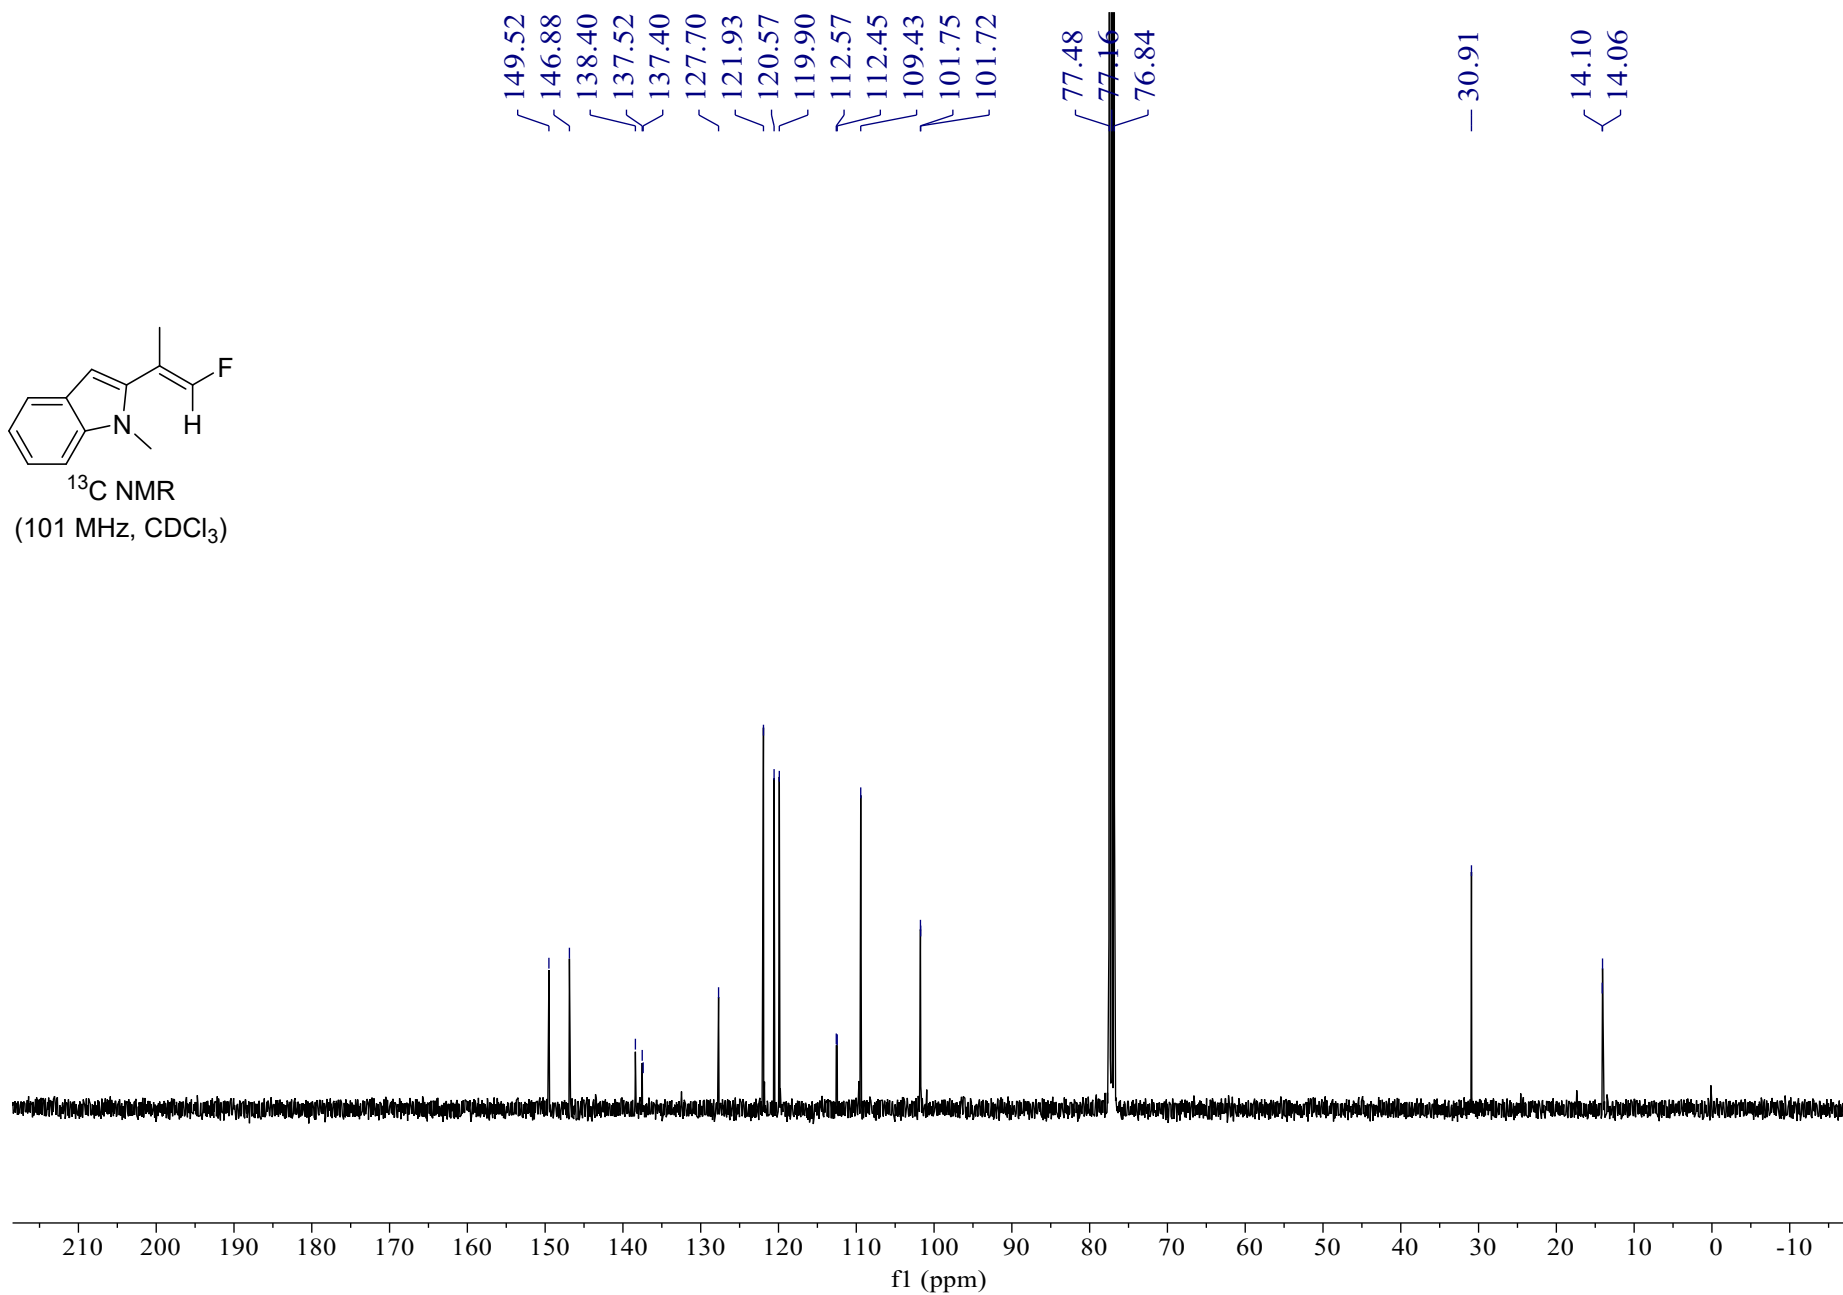

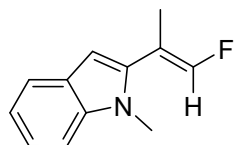

<sup>19</sup>F NMR  
(376 MHz, CDCl<sub>3</sub>)

-123.50  
-123.50  
-123.52  
-123.53  
-123.72  
-123.73  
-123.74  
-123.75

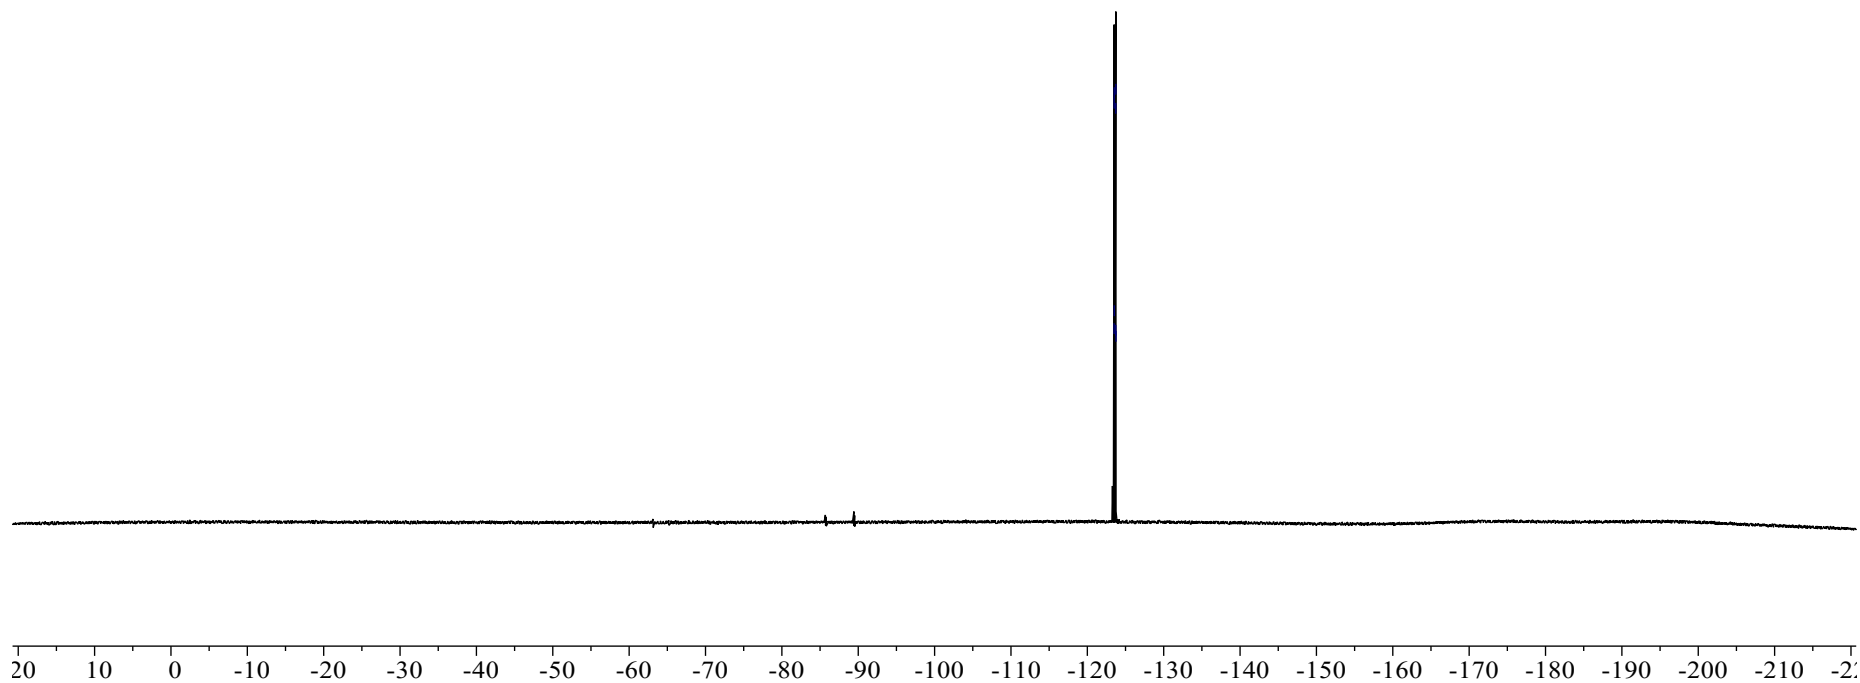

f1 (ppm)

LX-10 #21 RT: 0.15 AV: 1 NL: 6.22E5  
 T: FTMS + p ESI Full ms [100.0000-1500.0000]

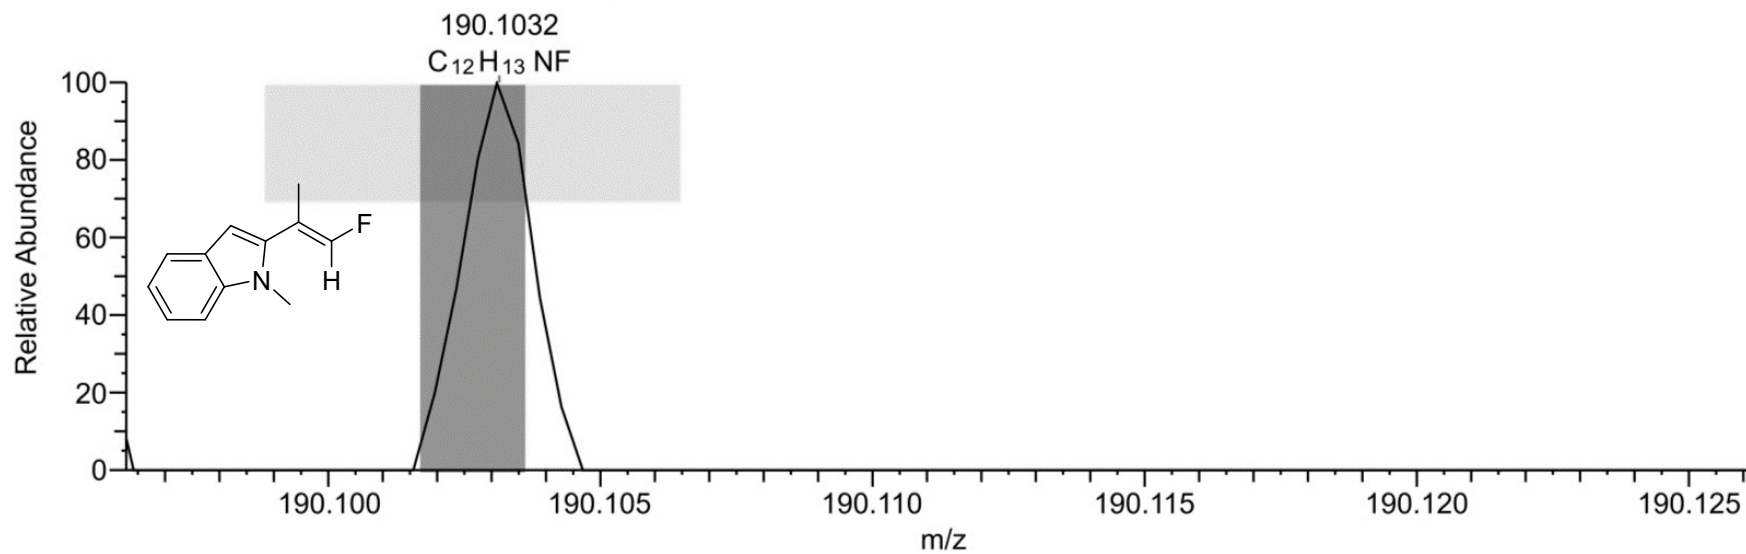

| Peak M...    | Display...           | S Fit                    | RDB  | Delta [p... | Theo....      | Rank | Combin... | # Matc... | # Misse... | MS Cov... | Pattern... | MSMS...          |
|--------------|----------------------|--------------------------|------|-------------|---------------|------|-----------|-----------|------------|-----------|------------|------------------|
| 190.103<br>2 | $C_{12}H_{13}N$<br>F | 62.0241<br>087584<br>579 | 6.50 | 2.69        | 190.102<br>65 | 1    | 98        | 1         | 0          | 100       | 100        | (Collect<br>ion) |



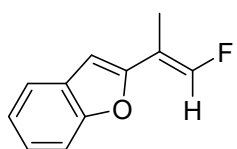

<sup>1</sup>H NMR  
(400 MHz, CDCl<sub>3</sub>)

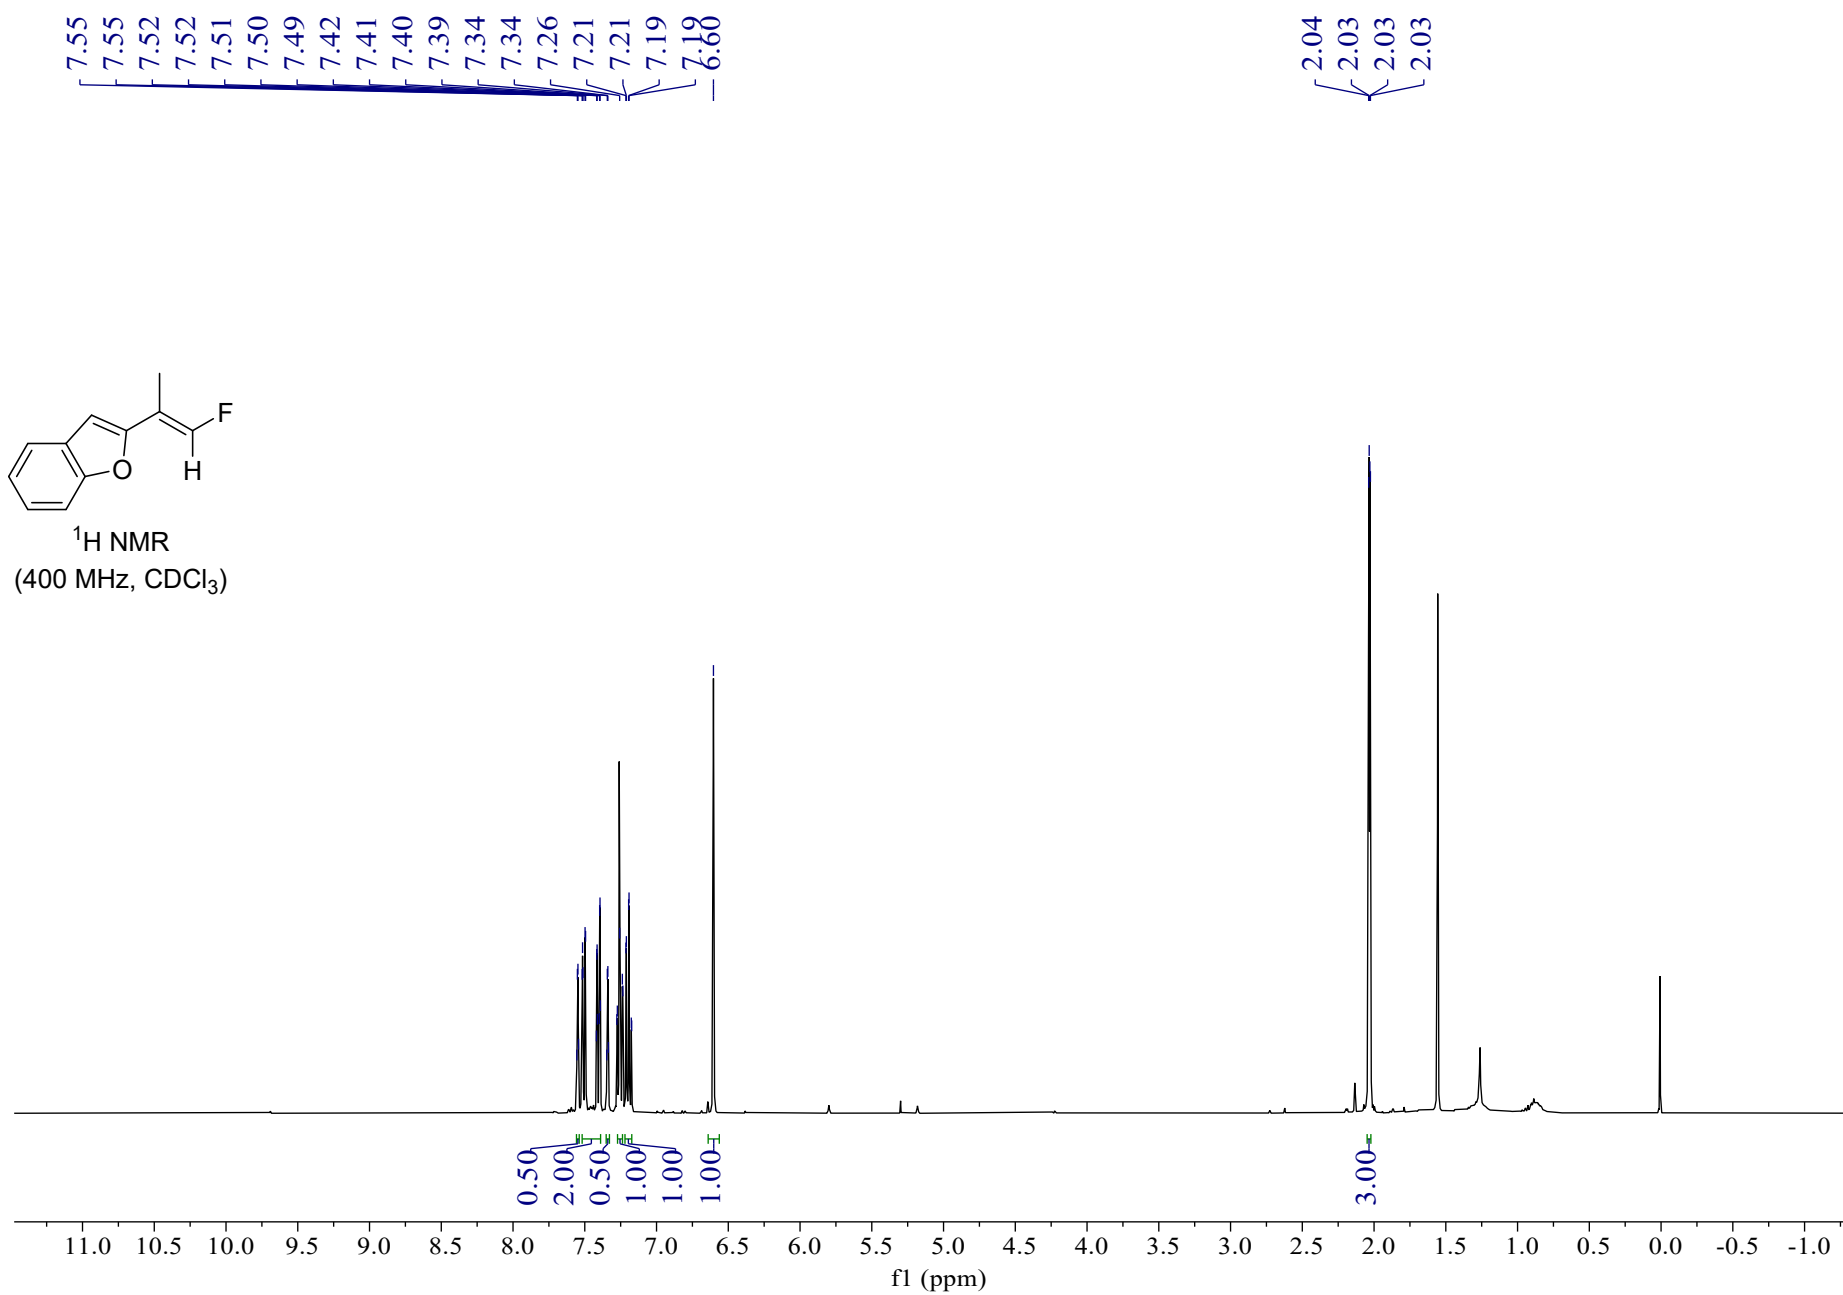

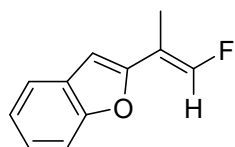

<sup>13</sup>C NMR  
(101 MHz, CDCl<sub>3</sub>)

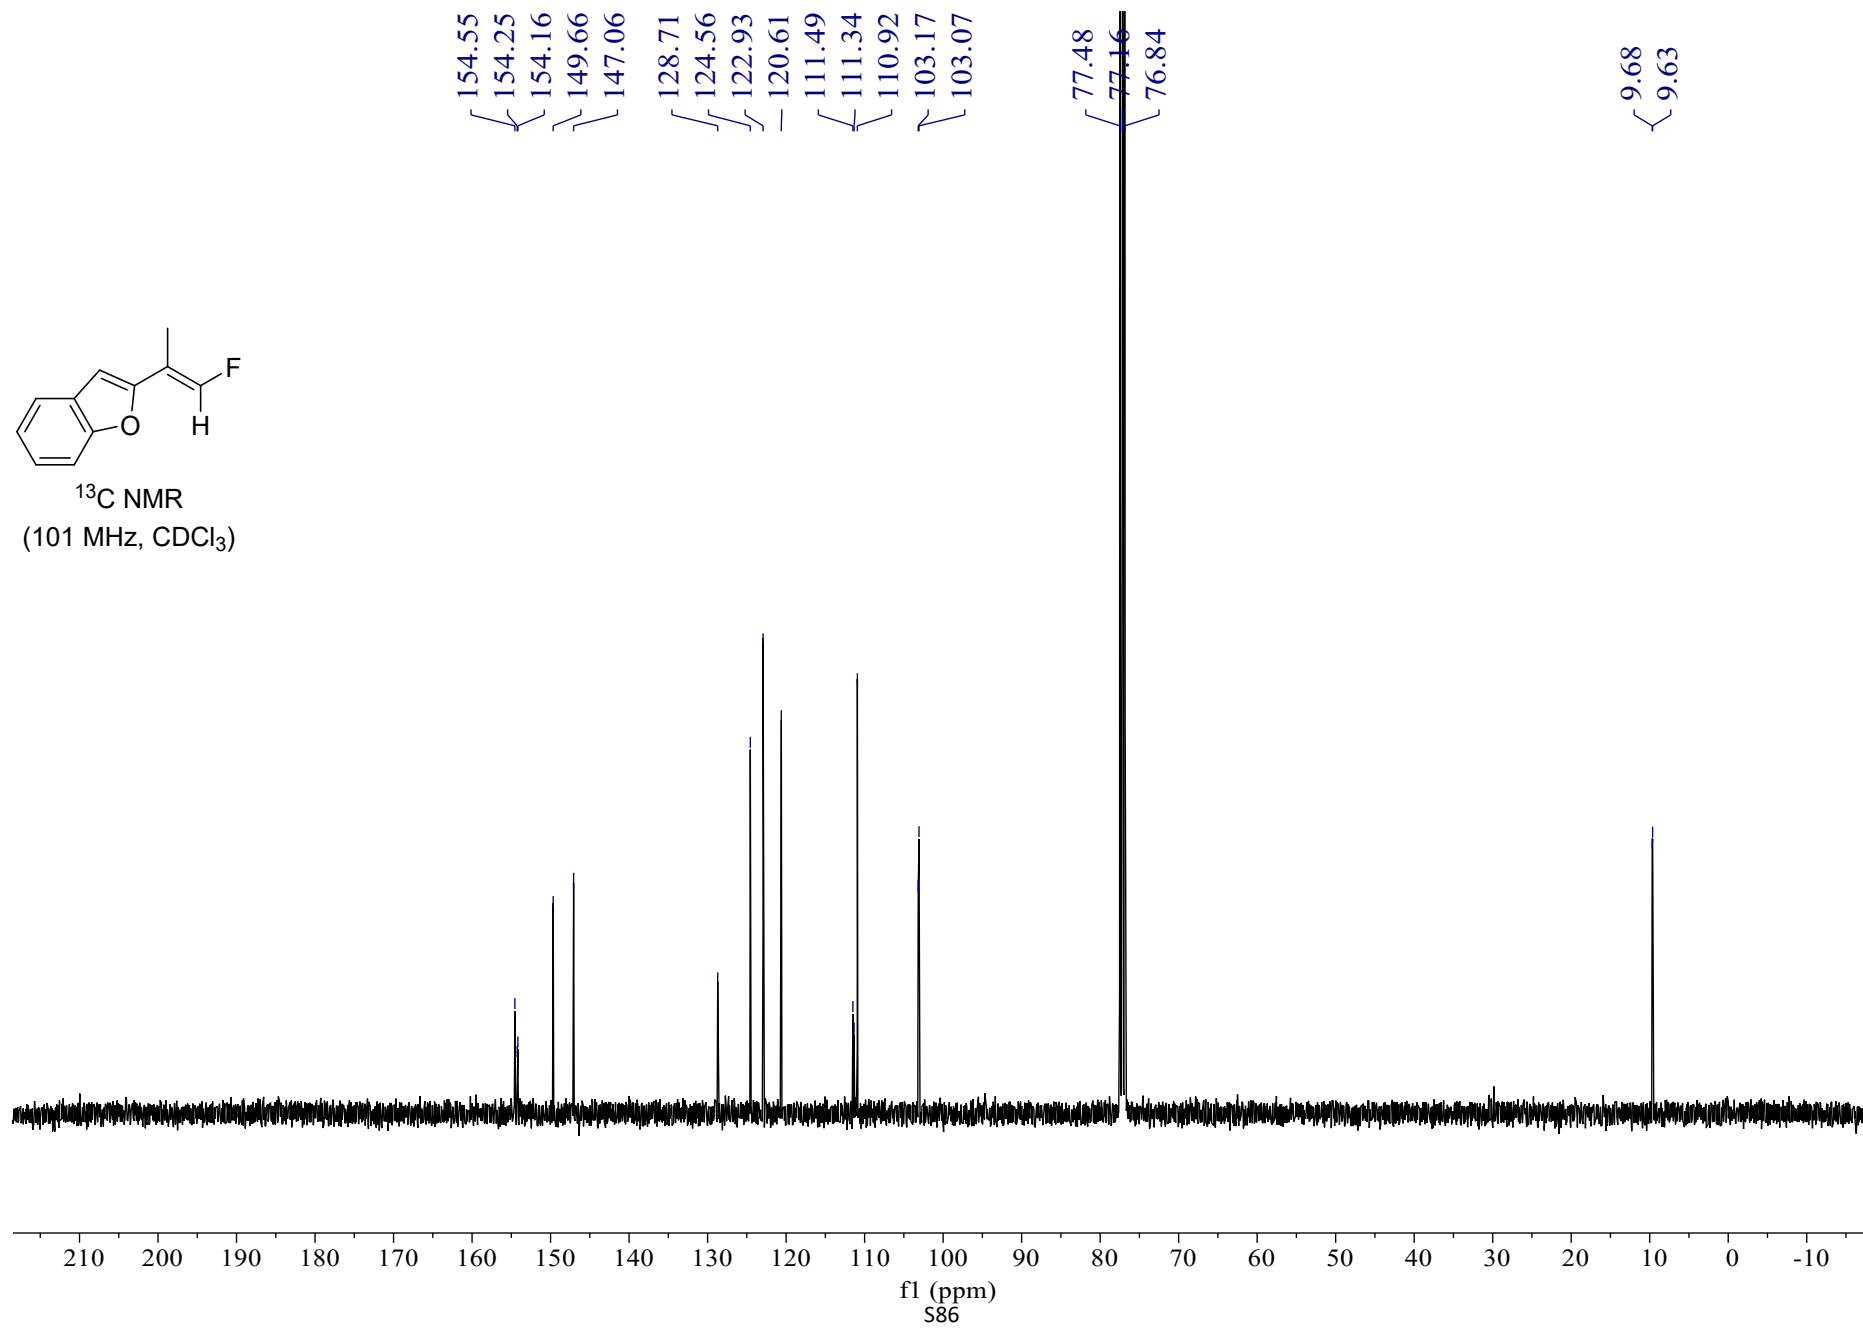

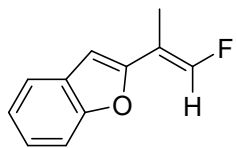

$^{19}\text{F}$  NMR  
(376 MHz,  $\text{CDCl}_3$ )

-132.41  
-132.42  
-132.43  
-132.44  
-132.64  
-132.64  
-132.65  
-132.66

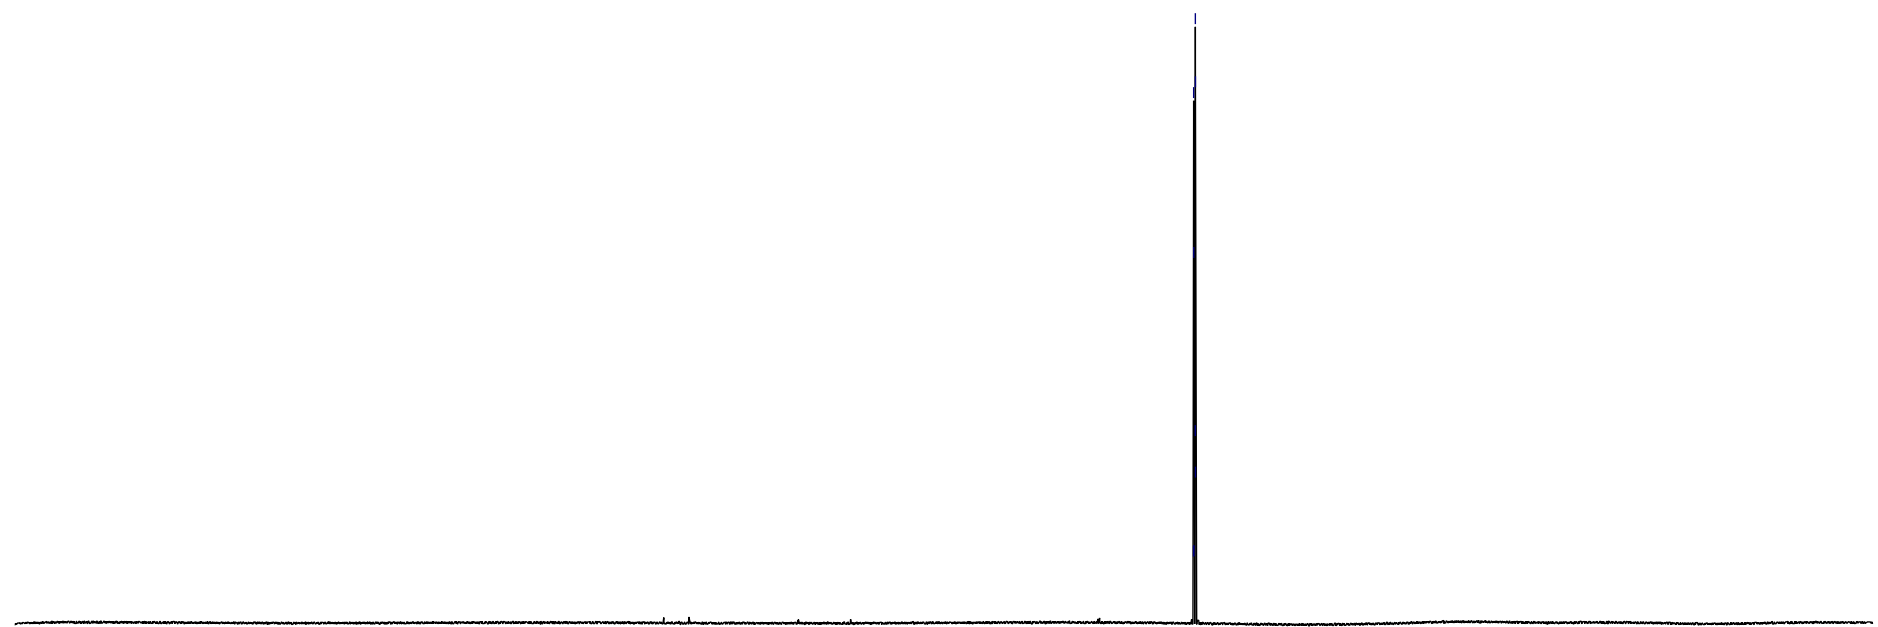

20 10 0 -10 -20 -30 -40 -50 -60 -70 -80 -90 -100 -110 -120 -130 -140 -150 -160 -170 -180 -190 -200 -210 -220  
f1 (ppm)  
S87

LX-17 #125 RT: 0.94 AV: 1 NL: 5.90E4  
 T: FTMS + p ESI Full ms [100.0000-1500.0000]

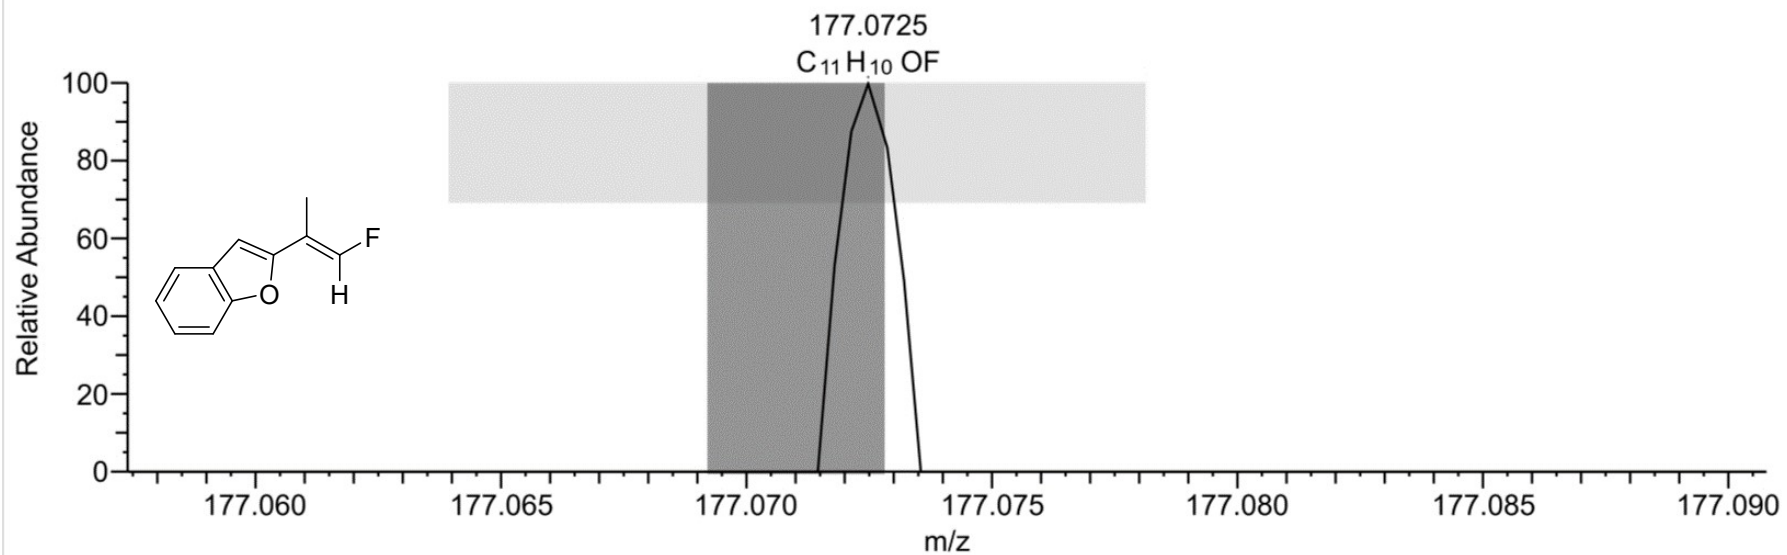

| Peak M...    | Display...           | S Fit                    | RDB  | Delta [p... | Theo....      | Rank | Combin... | # Matc... | # Misse... | MS Cov... | Pattern... | MSMS...          |
|--------------|----------------------|--------------------------|------|-------------|---------------|------|-----------|-----------|------------|-----------|------------|------------------|
| 177.072<br>5 | $C_{11}H_{10}O$<br>F | 41.7151<br>195499<br>976 | 6.50 | 8.24        | 177.071<br>02 | 1    | 96.93     | 1         | 0          | 100       | 100        | (Collect<br>ion) |

7.76  
7.76  
7.76  
7.75  
7.75  
7.74  
7.74  
7.74  
7.74  
7.71  
7.70  
7.69  
7.68  
7.68  
7.35  
7.35  
7.33  
7.33  
7.32  
7.31  
7.31  
7.30  
7.30  
7.29  
7.29  
7.28  
7.28  
7.26  
7.20  
7.09  
7.08  
7.08  
7.08

2.14  
2.14  
2.13  
2.13

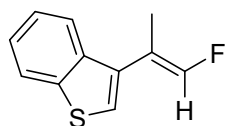

<sup>1</sup>H NMR  
(400 MHz, CDCl<sub>3</sub>)

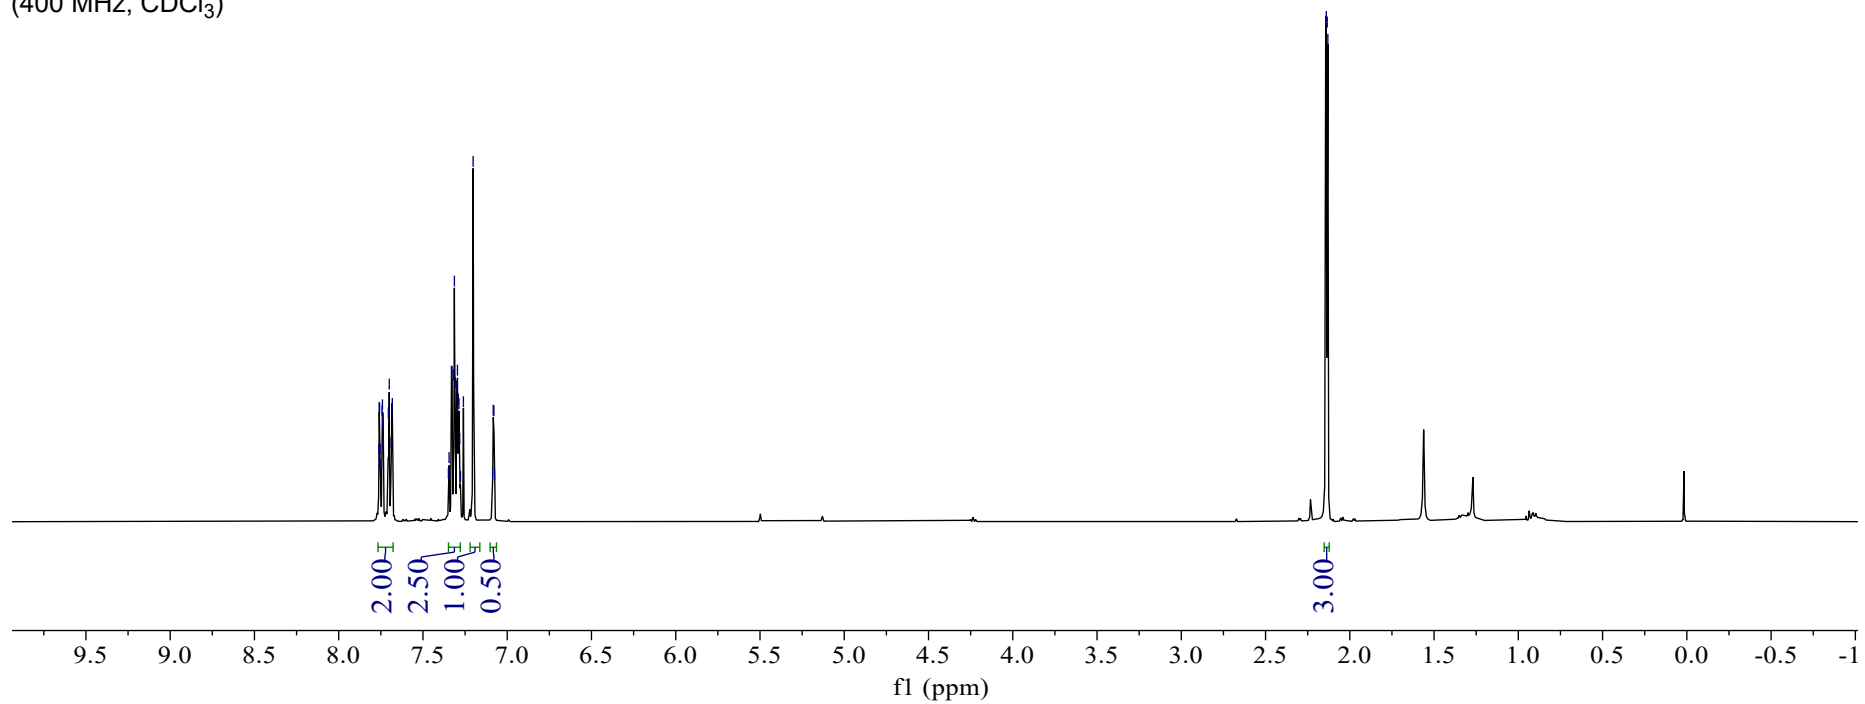

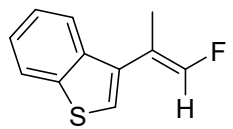

<sup>13</sup>C NMR  
(101 MHz, CDCl<sub>3</sub>)

148.38  
145.77  
140.34  
140.25  
139.94  
138.26  
124.74  
124.60  
123.26  
122.15  
120.80  
120.72  
115.93  
115.79

77.48  
77.16  
76.84

12.12  
12.06

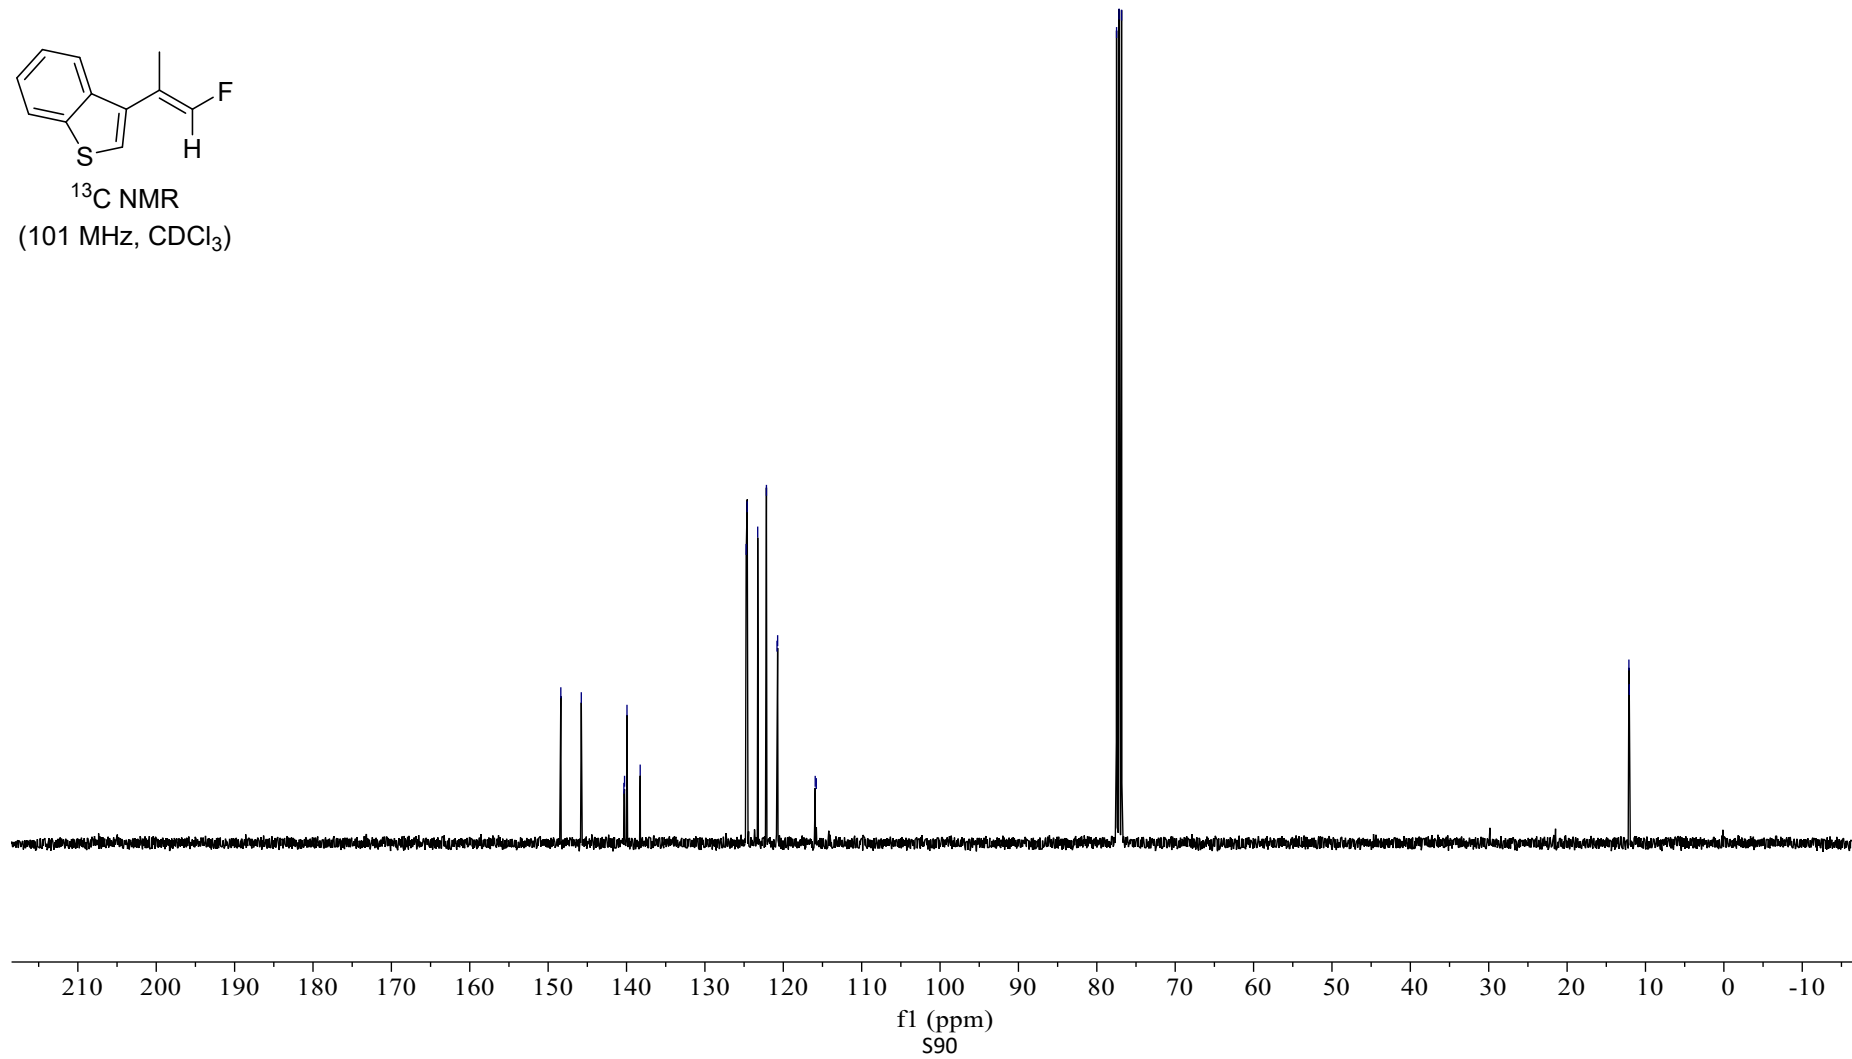

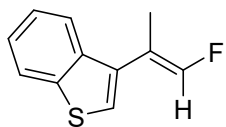

<sup>19</sup>F NMR  
(376 MHz, CDCl<sub>3</sub>)

-129.06  
-129.07  
-129.08  
-129.09  
-129.28  
-129.29  
-129.30  
-129.31

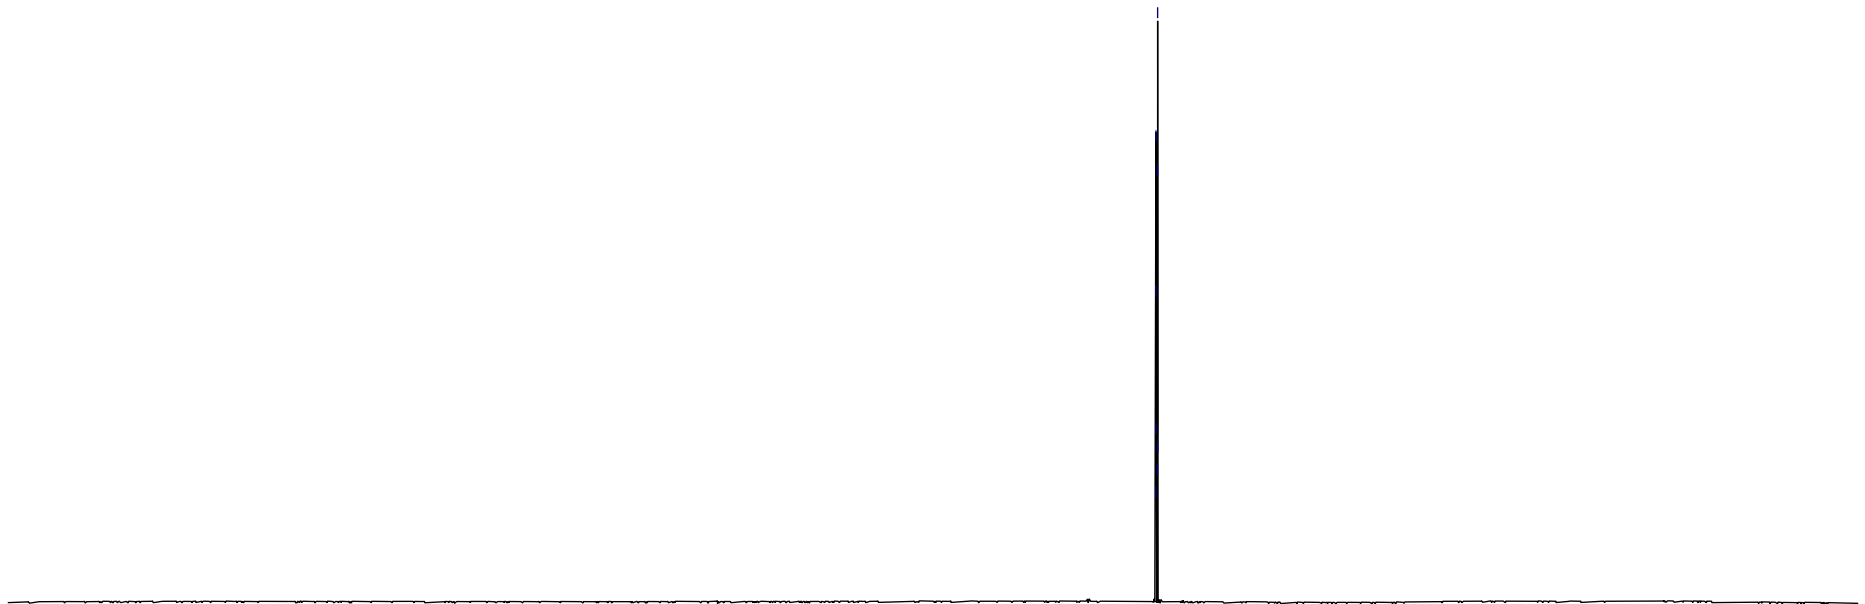

20 10 0 -10 -20 -30 -40 -50 -60 -70 -80 -90 -100 -110 -120 -130 -140 -150 -160 -170 -180 -190 -200 -210 -220  
f1 (ppm)  
S91

LX-12 #17 RT: 0.12 AV: 1 NL: 1.33E6  
 T: FTMS + p ESI Full ms [100.0000-1500.0000]

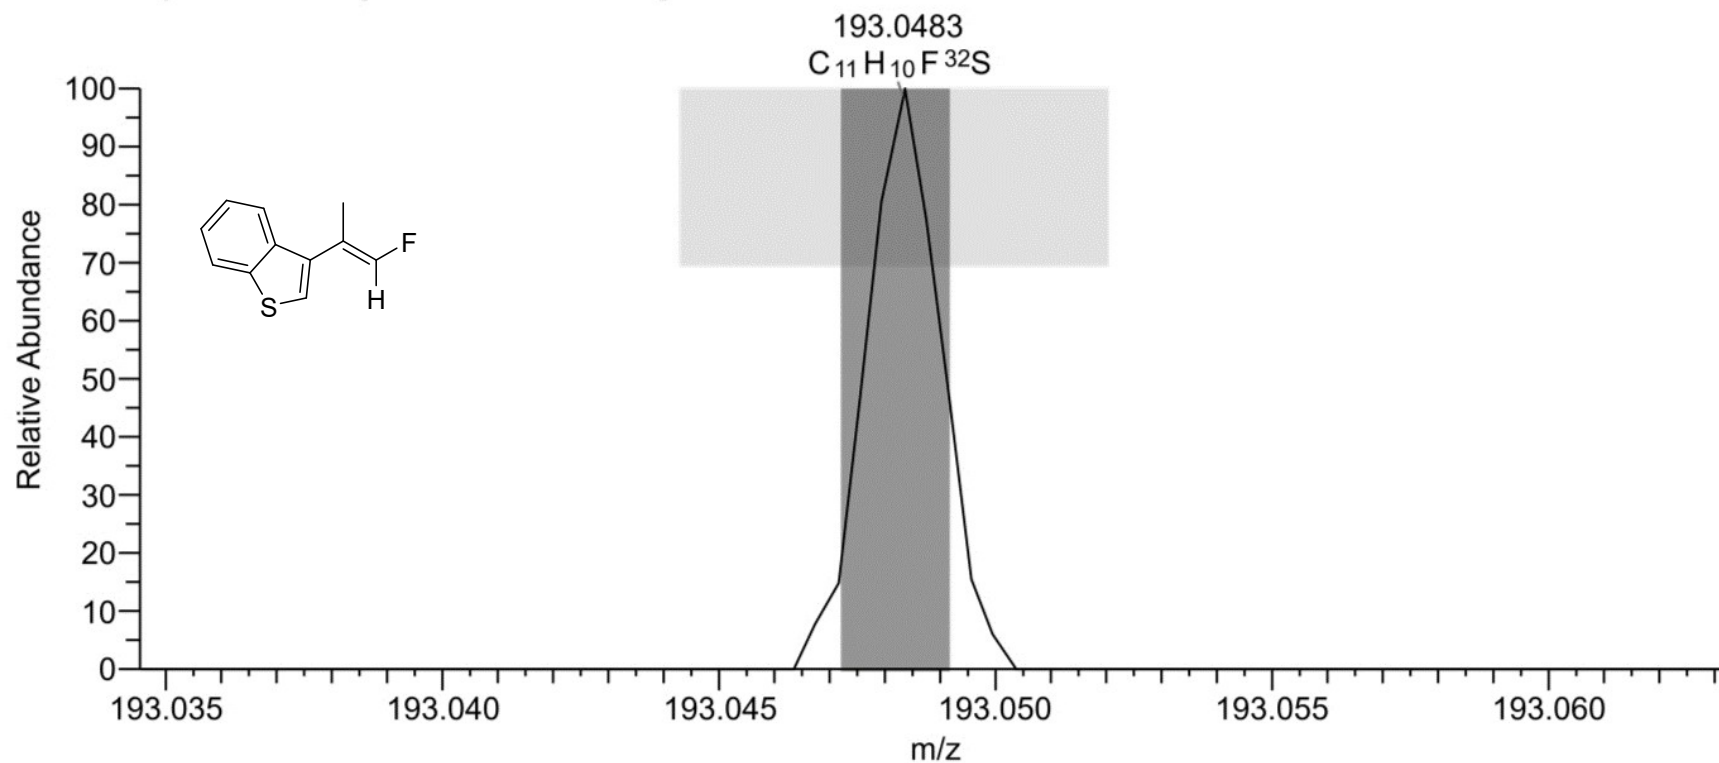

| Peak M...    | Display...                    | S Fit                    | RDB  | Delta [p... | Theo....      | Rank | Combin... | # Matc... | # Misse... | MS Cov... | Pattern... | MSMS...          |
|--------------|-------------------------------|--------------------------|------|-------------|---------------|------|-----------|-----------|------------|-----------|------------|------------------|
| 193.048<br>3 | $C_{11}H_{10}F^3$<br>$^{32}S$ | 87.9826<br>424073<br>948 | 6.50 | 0.85        | 193.048<br>18 | 1    | 99.37     | 1         | 0          | 100       | 100        | (Collect<br>ion) |



7.63  
7.63  
7.62  
7.61  
7.60  
7.60  
7.59  
7.58  
7.49  
7.47  
7.45  
7.42  
7.41  
7.40  
7.39  
7.39  
7.37  
7.26  
7.10  
7.10  
6.89  
6.89  
6.83  
6.83  
6.82  
6.82  
6.62  
6.61  
6.61  
6.61

2.11  
2.11  
2.10  
2.10  
2.10  
1.98  
1.97  
1.96  
1.96

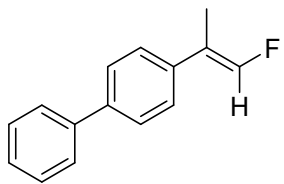

3m (from trifluoromethyl alkene);  
<sup>1</sup>H NMR (400 MHz, CDCl<sub>3</sub>)

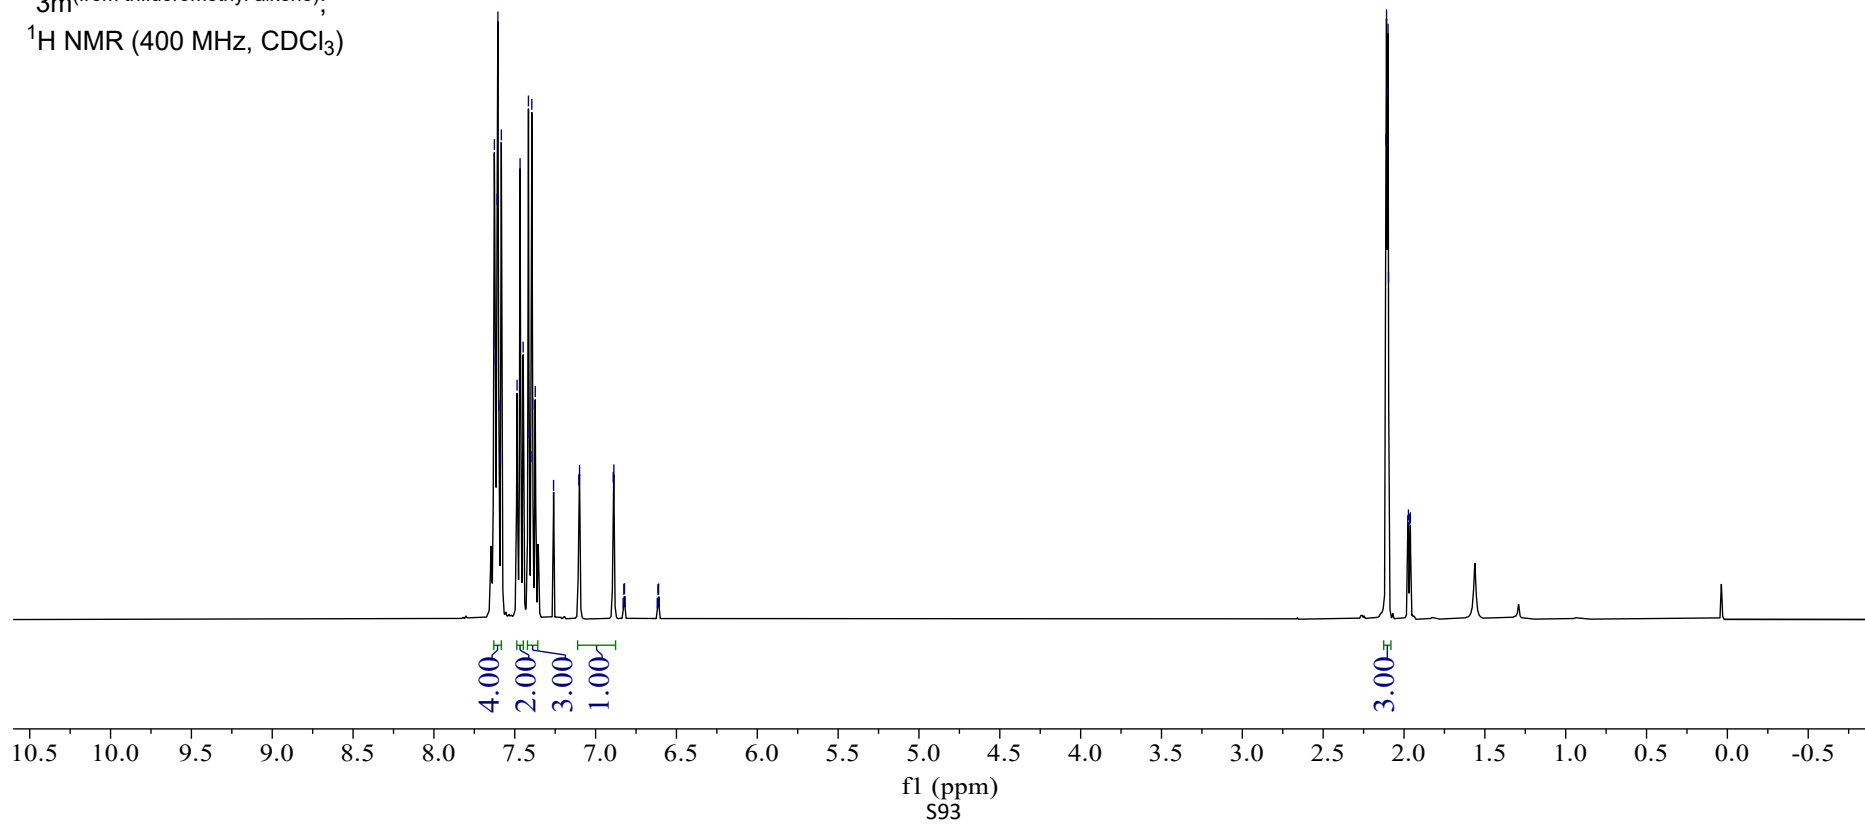

LX-20 #117 RT: 0.88 AV: 1 NL: 7.09E4  
 T: FTMS + p ESI Full ms [100.0000-1500.0000]

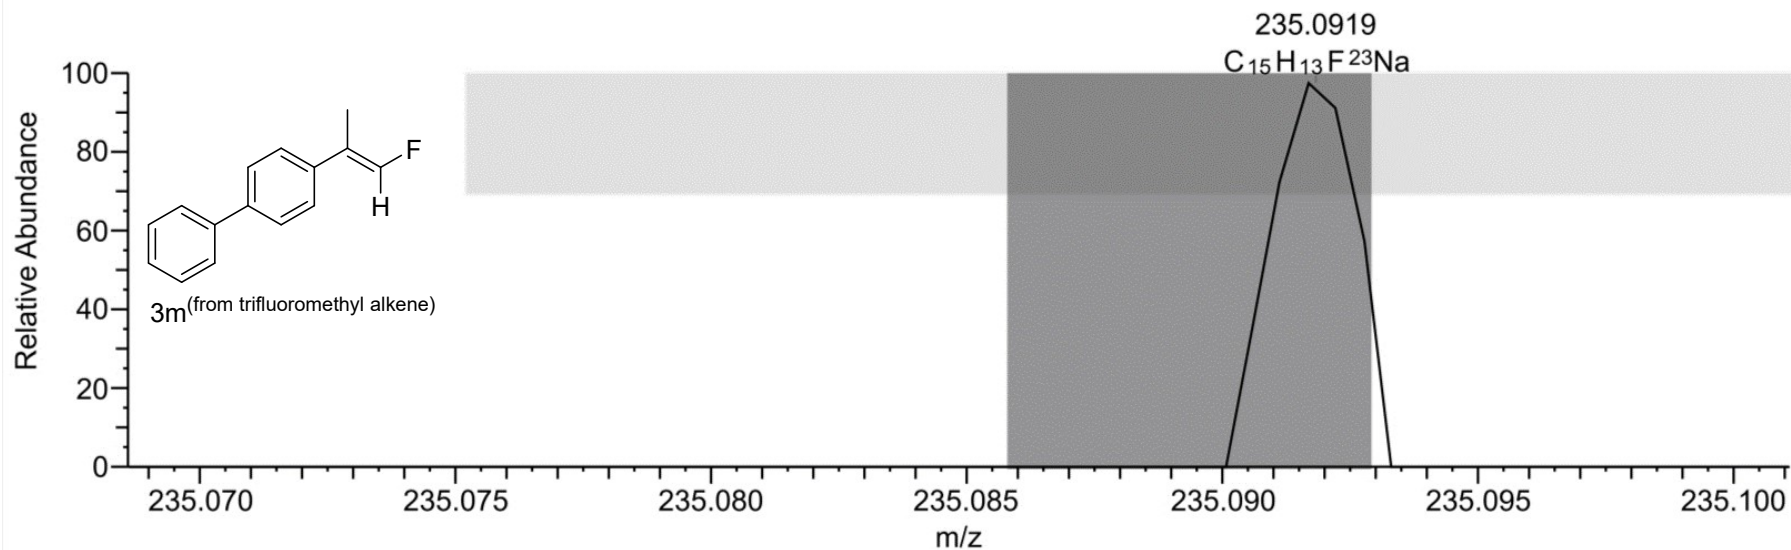

| Peak M... | Display...             | S Fit                    | RDB  | Delta [p... | Theo....  | Rank | Combin... | # Matc... | # Misse... | MS Cov... | Pattern... | MSMS...      |
|-----------|------------------------|--------------------------|------|-------------|-----------|------|-----------|-----------|------------|-----------|------------|--------------|
| 235.0919  | $C_{15}H_{13}F^{23}Na$ | 49.4028<br>503376<br>902 | 8.50 | 10.73       | 235.08935 | 1    | 97.34     | 1         | 0          | 100       | 100        | (Collection) |

7.63  
7.63  
7.62  
7.61  
7.61  
7.59  
7.58  
7.49  
7.47  
7.45  
7.42  
7.40  
7.40  
7.40  
7.37  
7.26  
7.11  
7.10  
7.10  
7.10  
6.90  
6.89  
6.89  
6.88  
6.83  
6.83  
6.82  
6.82  
6.62  
6.62  
6.61  
6.61

2.11  
2.11  
2.10  
2.10  
1.98  
1.97  
1.97  
1.96

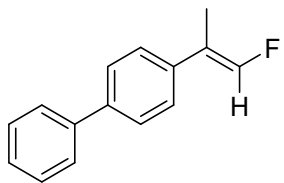

3m (from gem-difluoroalkene),  
<sup>1</sup>H NMR (400 MHz, CDCl<sub>3</sub>)

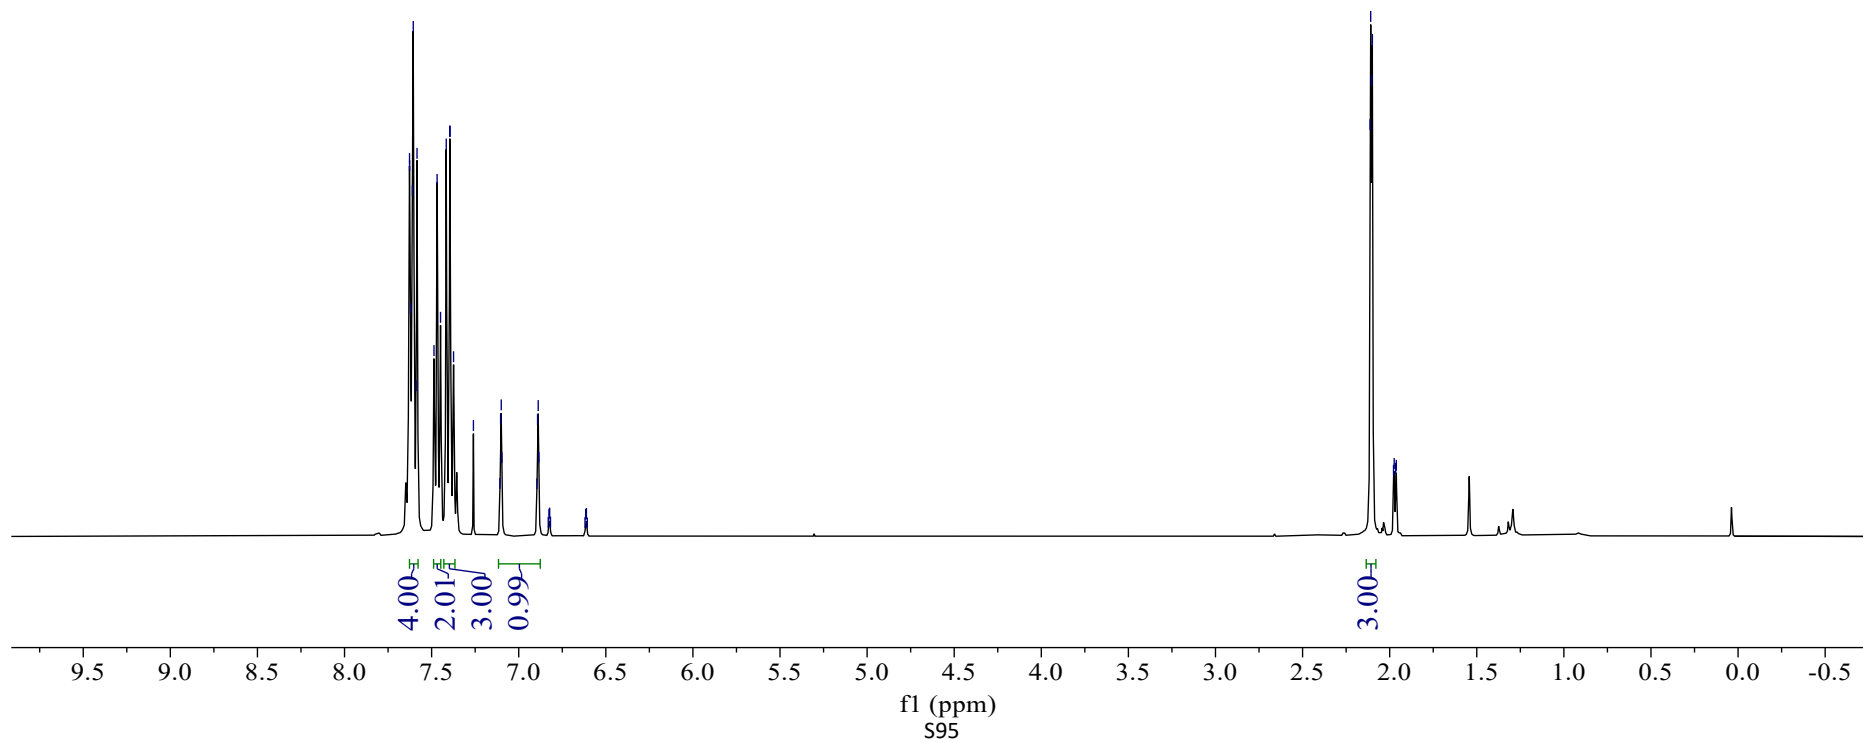

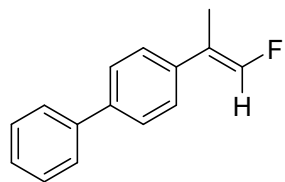

3m (from gem-difluoroalkene),  
<sup>13</sup>C NMR (101 MHz, CDCl<sub>3</sub>)

147.50  
144.93  
140.74  
140.42  
136.69  
136.60  
128.96  
128.23  
127.50  
127.39  
127.11  
126.37  
126.34  
119.86  
119.76

77.48  
77.16  
76.84

12.31  
12.25

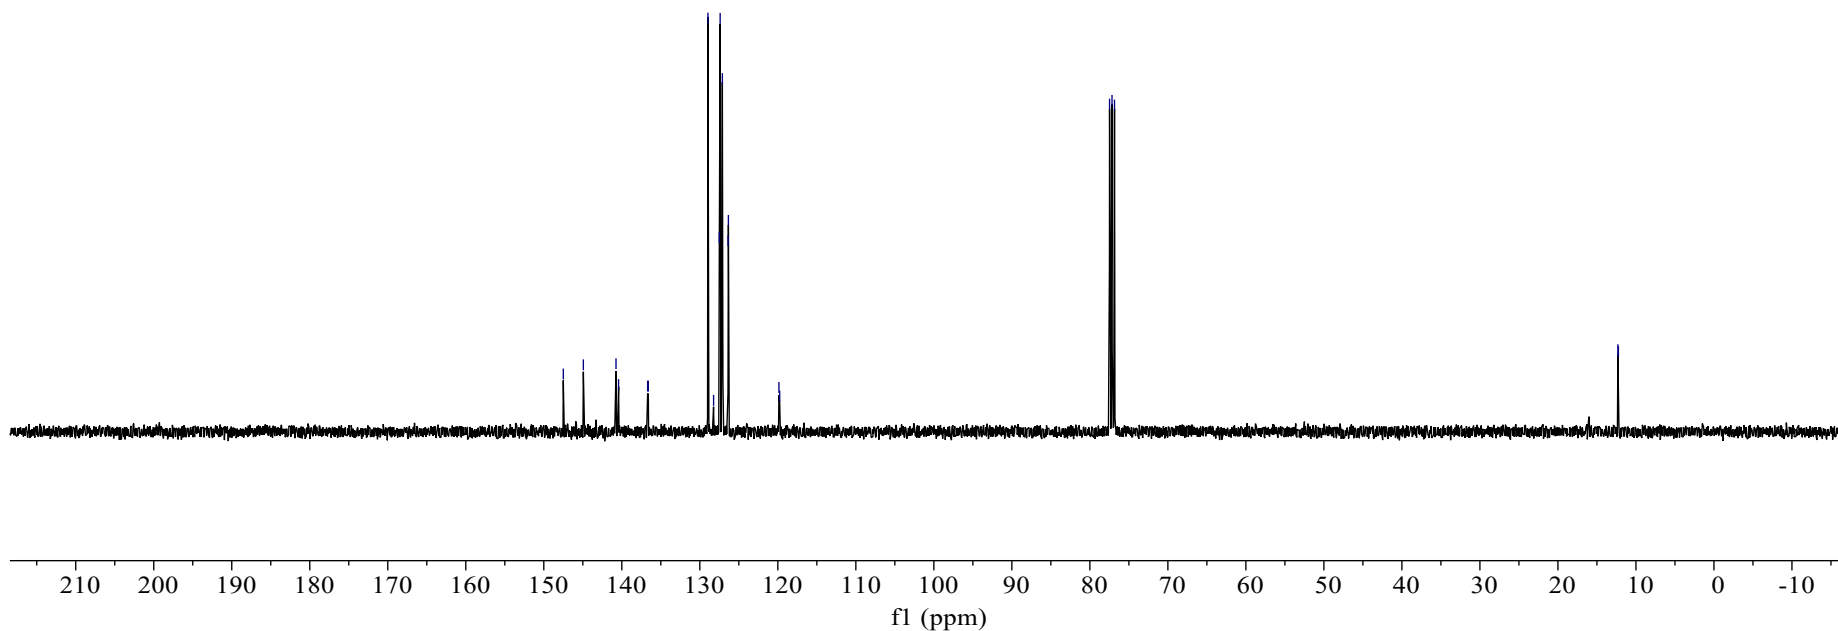

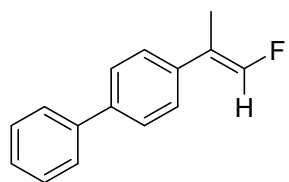

3m (from gem-difluoroalkene),  
<sup>19</sup>F NMR (376 MHz, CDCl<sub>3</sub>)

-127.99  
-128.01  
-128.02  
-128.03  
-128.22  
-128.23  
-128.24  
-128.26  
-130.71  
-130.72  
-130.72  
-130.73  
-130.94  
-130.95  
-130.96

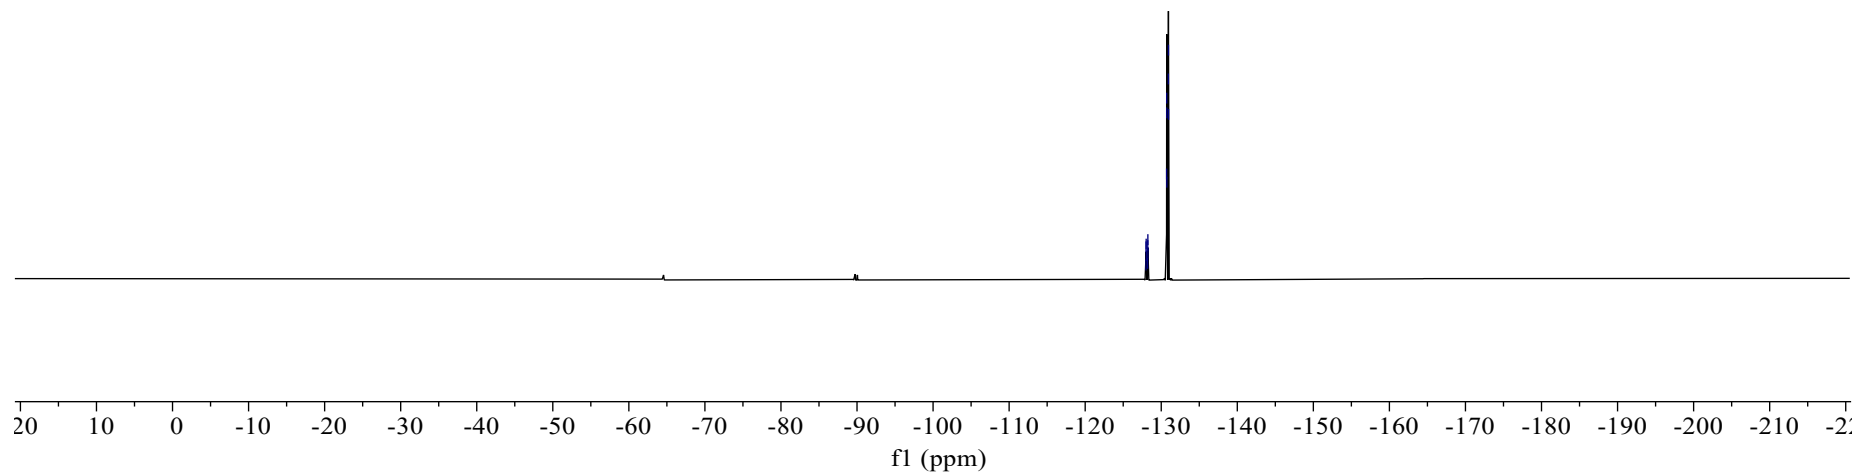

# Mass Spectrum SmartFormula Report

## Analysis Info

Analysis Name D:\LXMS\0106\_RC7\_01\_20524.d  
Method LC\_NO UV\_P50-1500\_6MIN.m  
Sample Name 0106

Acquisition D 2023-01-09 11:16:43

Operator Demo User  
Instrument compact 8255754.2017  
6

## Comment

## Acquisition Paramet

|             |            |               |          |                |           |
|-------------|------------|---------------|----------|----------------|-----------|
| Source Type | ESI        | Ion Polarity  | Positive | Set Nebulizer  | 3.0 Bar   |
| Focus       | Not active | Set Capillary | 4000 V   | Set Dry Heater | 200 °C    |
| Scan Begin  | 50 m/z     | Set End Plate | -500 V   | Set Dry Gas    | 8.0 l/min |

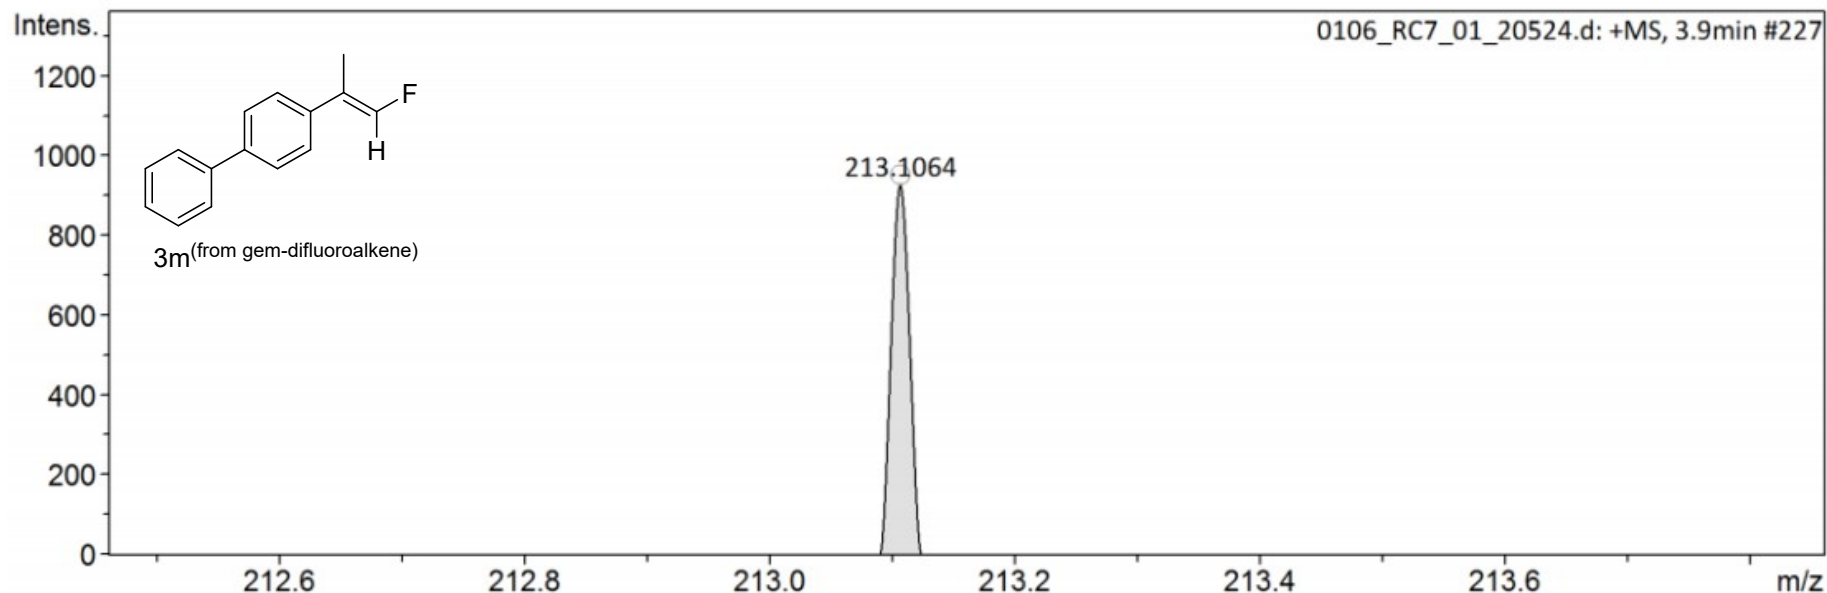

| Meas. m/z | # | Ion Formula | m/z      | err [ppm] | mSigma | # | mSigma | Score | rdb  | e;¥ | Conf | N-Rule |
|-----------|---|-------------|----------|-----------|--------|---|--------|-------|------|-----|------|--------|
| 213.1064  | 1 | C15H14F     | 213.1074 | 4.8       | 748.6  | 1 | 100.00 | 8.5   | even |     |      | ok     |

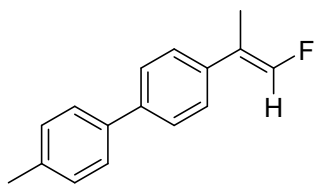

<sup>1</sup>H NMR  
(400 MHz, CDCl<sub>3</sub>)

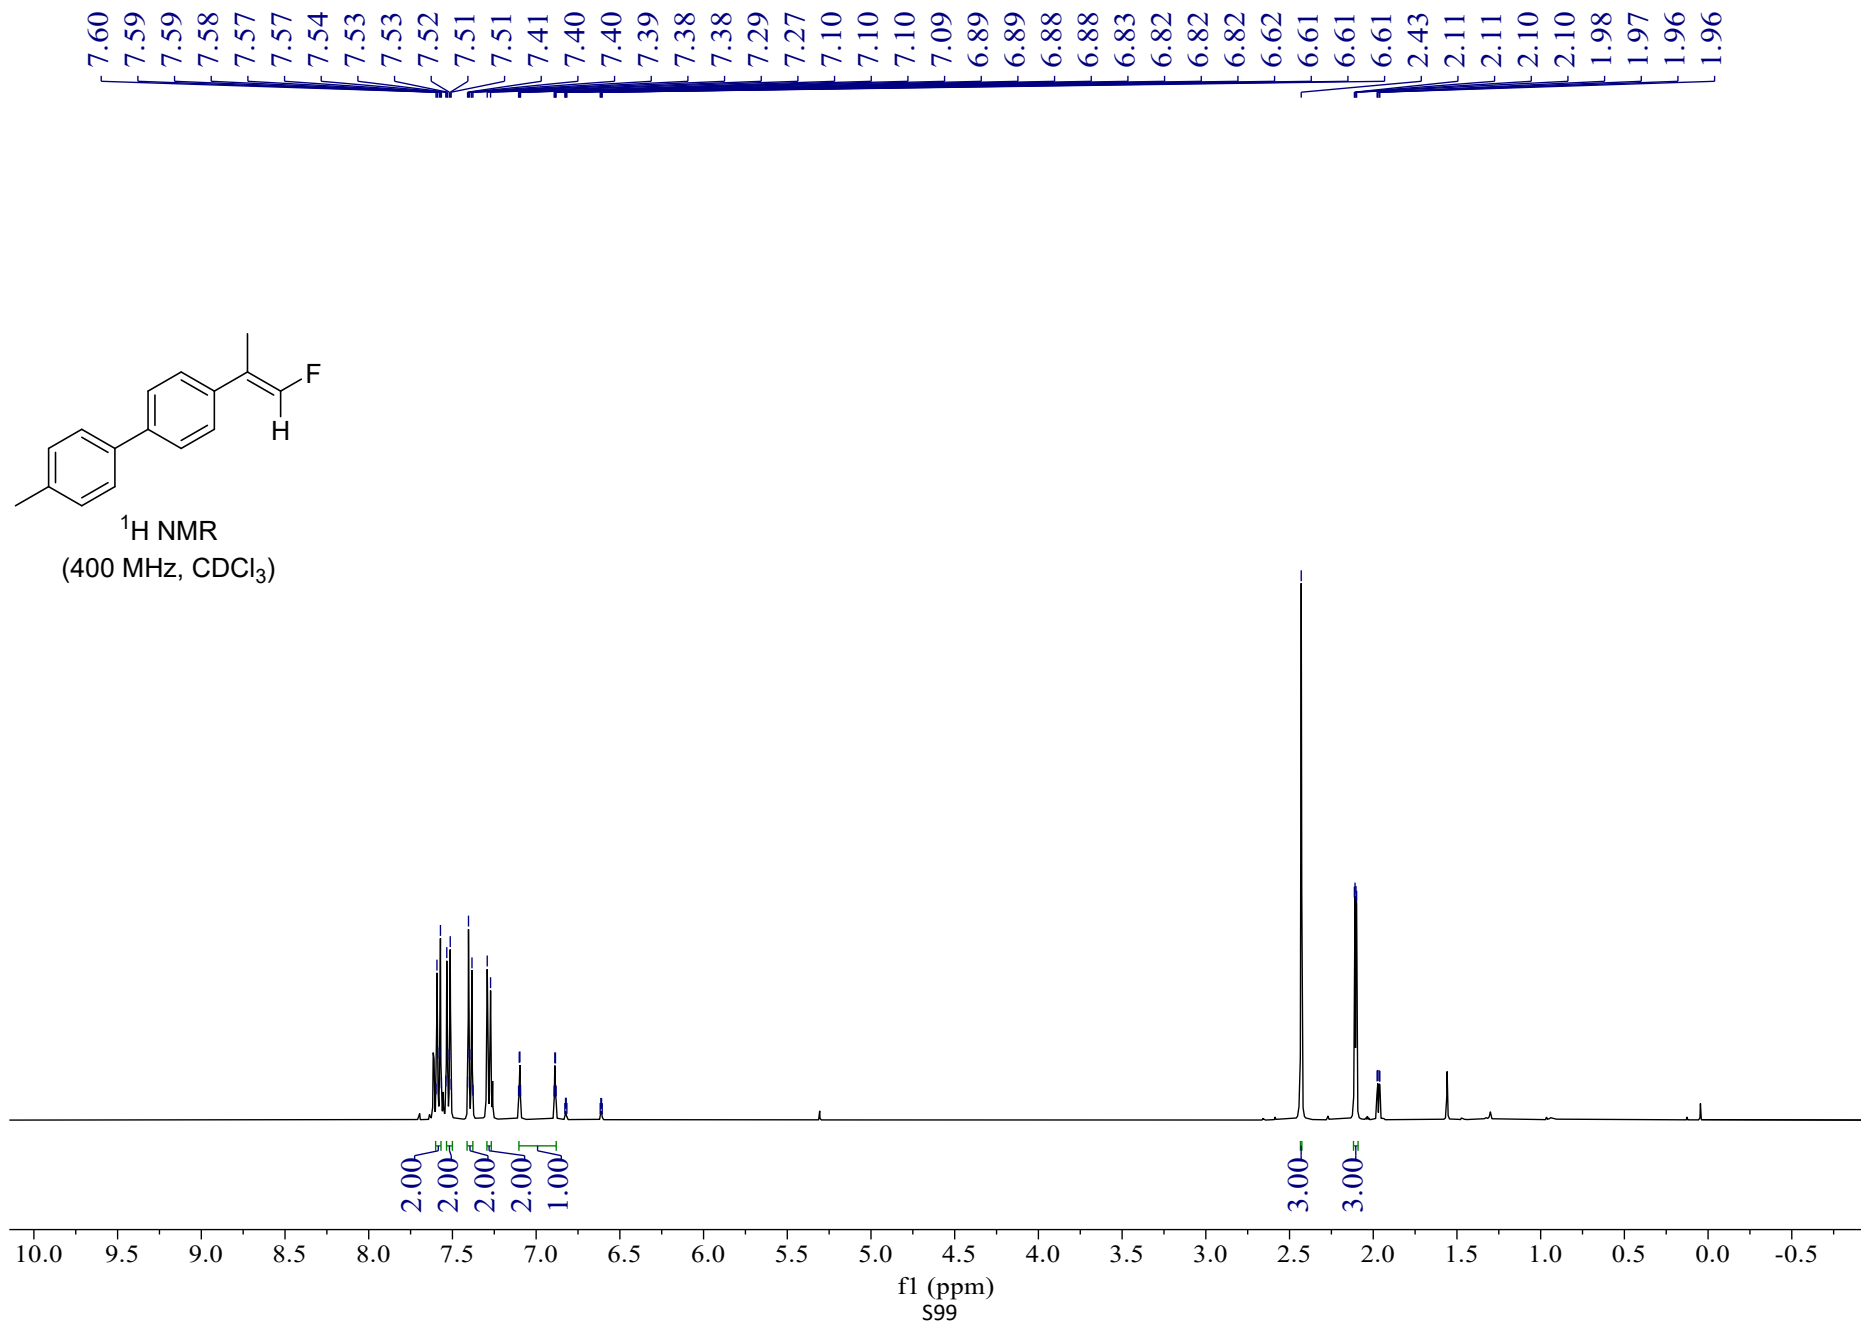

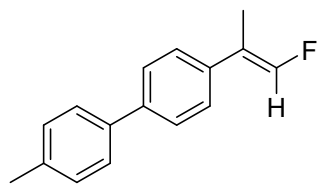

<sup>13</sup>C NMR  
(101 MHz, CDCl<sub>3</sub>)

147.42  
144.86  
140.34  
137.85  
137.31  
136.37  
136.28  
129.68  
127.17  
126.93  
126.33  
126.29  
119.88  
119.78

77.48  
77.16  
76.84

21.23  
12.30  
12.24

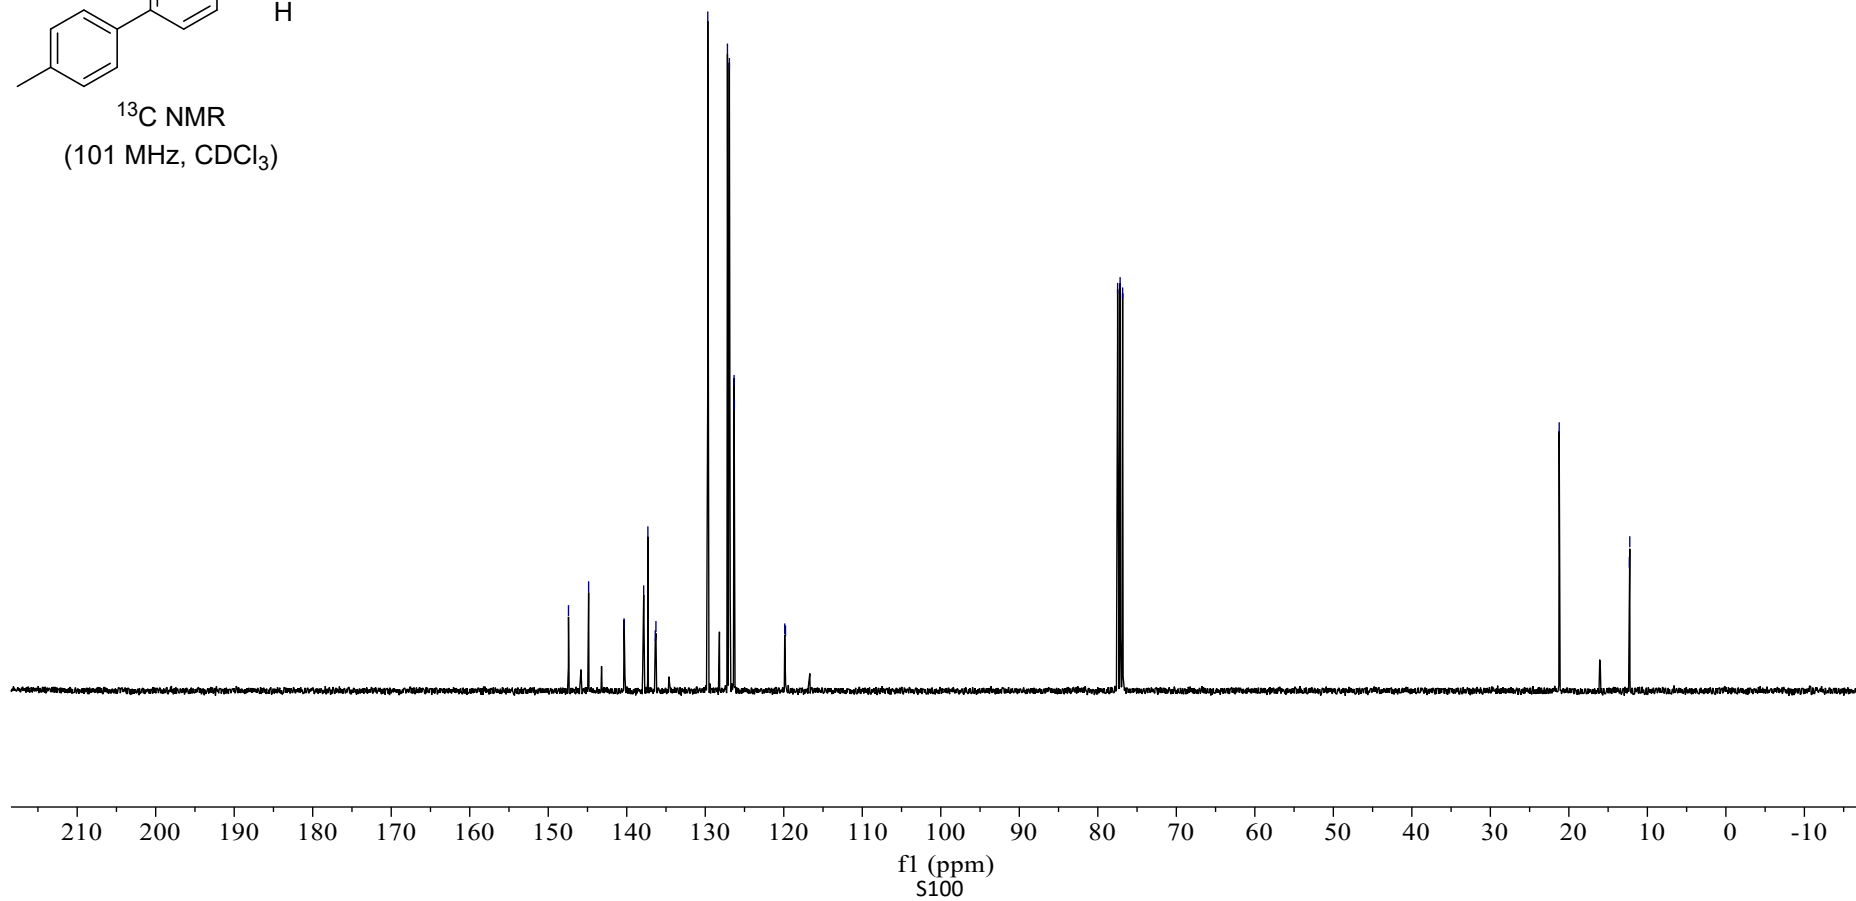



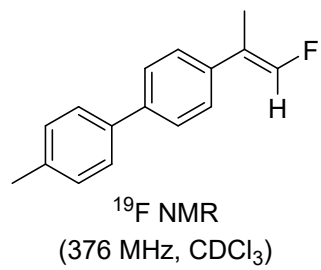

-128.01  
-128.02  
-128.03  
-128.04  
-128.23  
-128.24  
-128.26  
-128.27  
-130.79  
-130.80  
-130.81  
-130.82  
-131.02  
-131.03  
-131.04  
-131.05

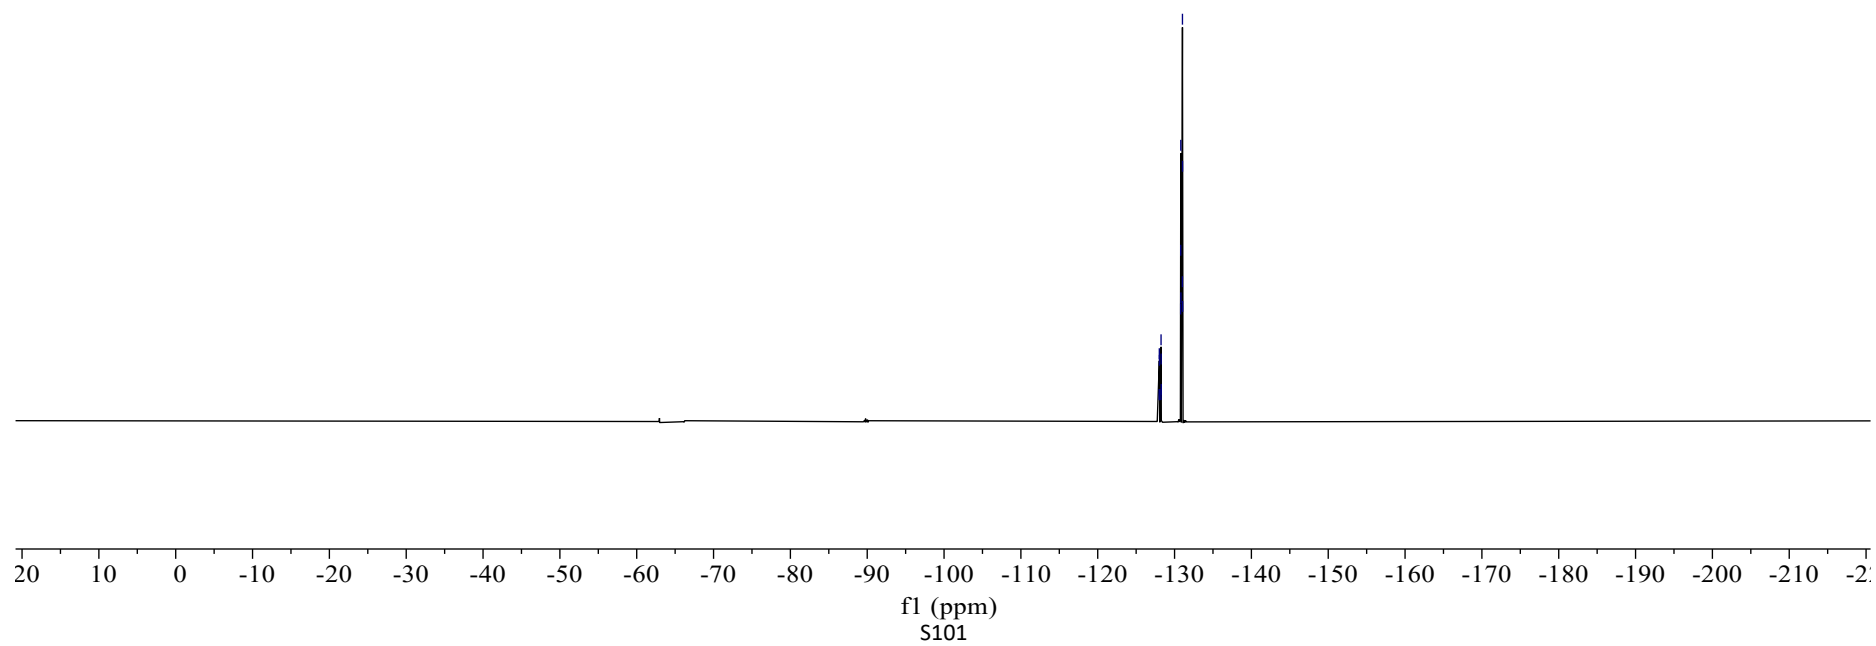

LX-1 #23 RT: 0.17 AV: 1 NL: 3.87E5  
 T: FTMS + p ESI Full ms [100.0000-1500.0000]

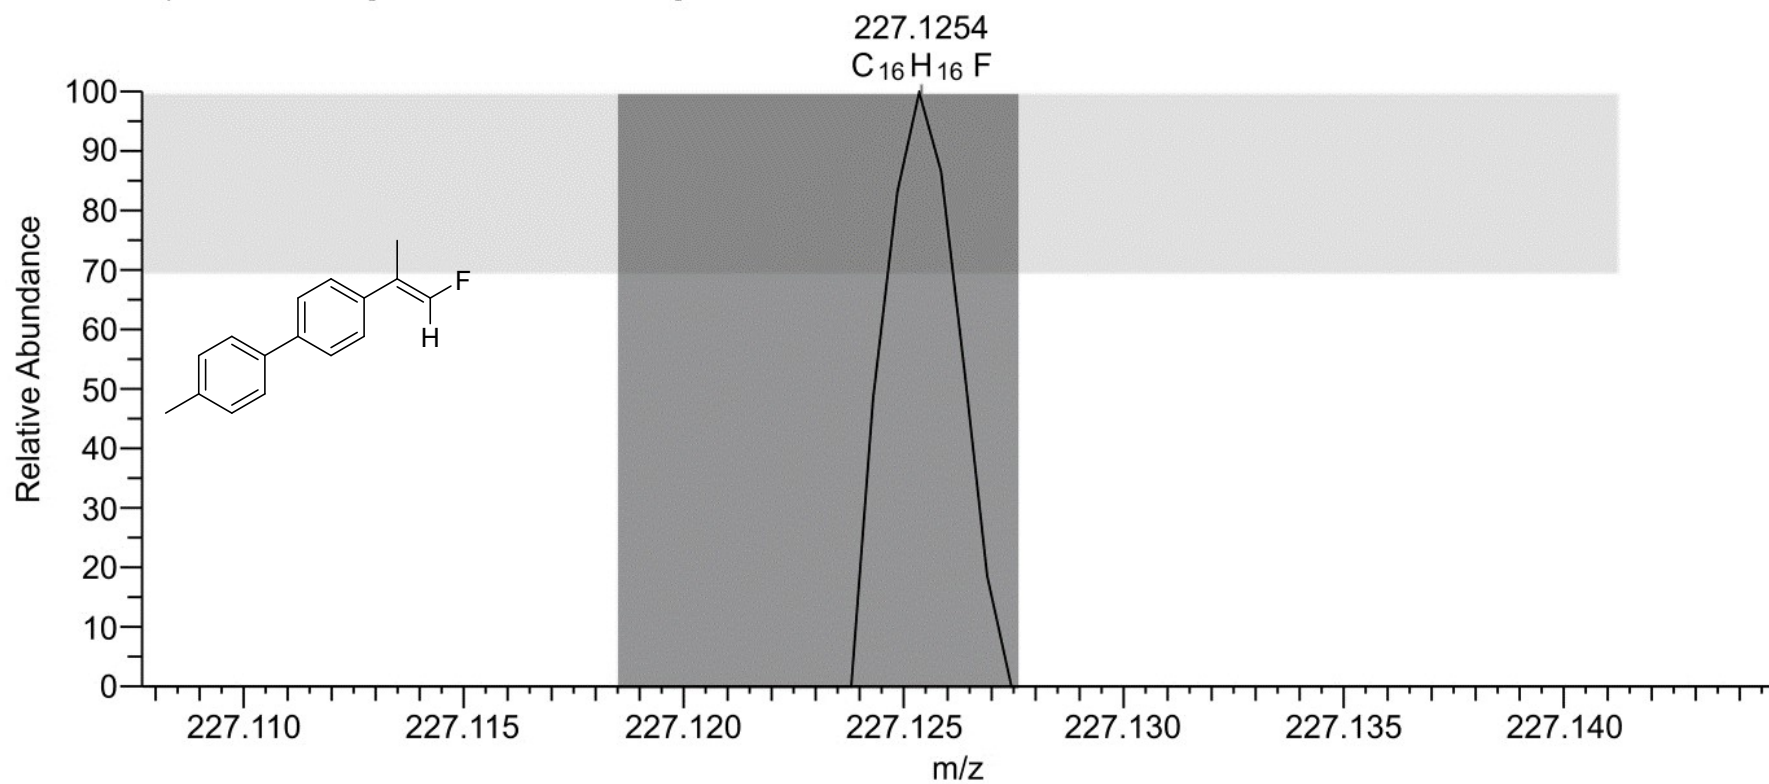

| Peak M...    | Display...      | S Fit                   | RDB  | Delta [p... | Theo....      | Rank | Combin... | # Matc... | # Misse... | MS Cov... | Pattern... | MSMS...          |
|--------------|-----------------|-------------------------|------|-------------|---------------|------|-----------|-----------|------------|-----------|------------|------------------|
| 227.125<br>4 | $C_{16}H_{16}F$ | 63.0765<br>510010<br>52 | 8.50 | 10.44       | 227.123<br>06 | 1    | 98.06     | 1         | 0          | 100       | 100        | (Collect<br>ion) |

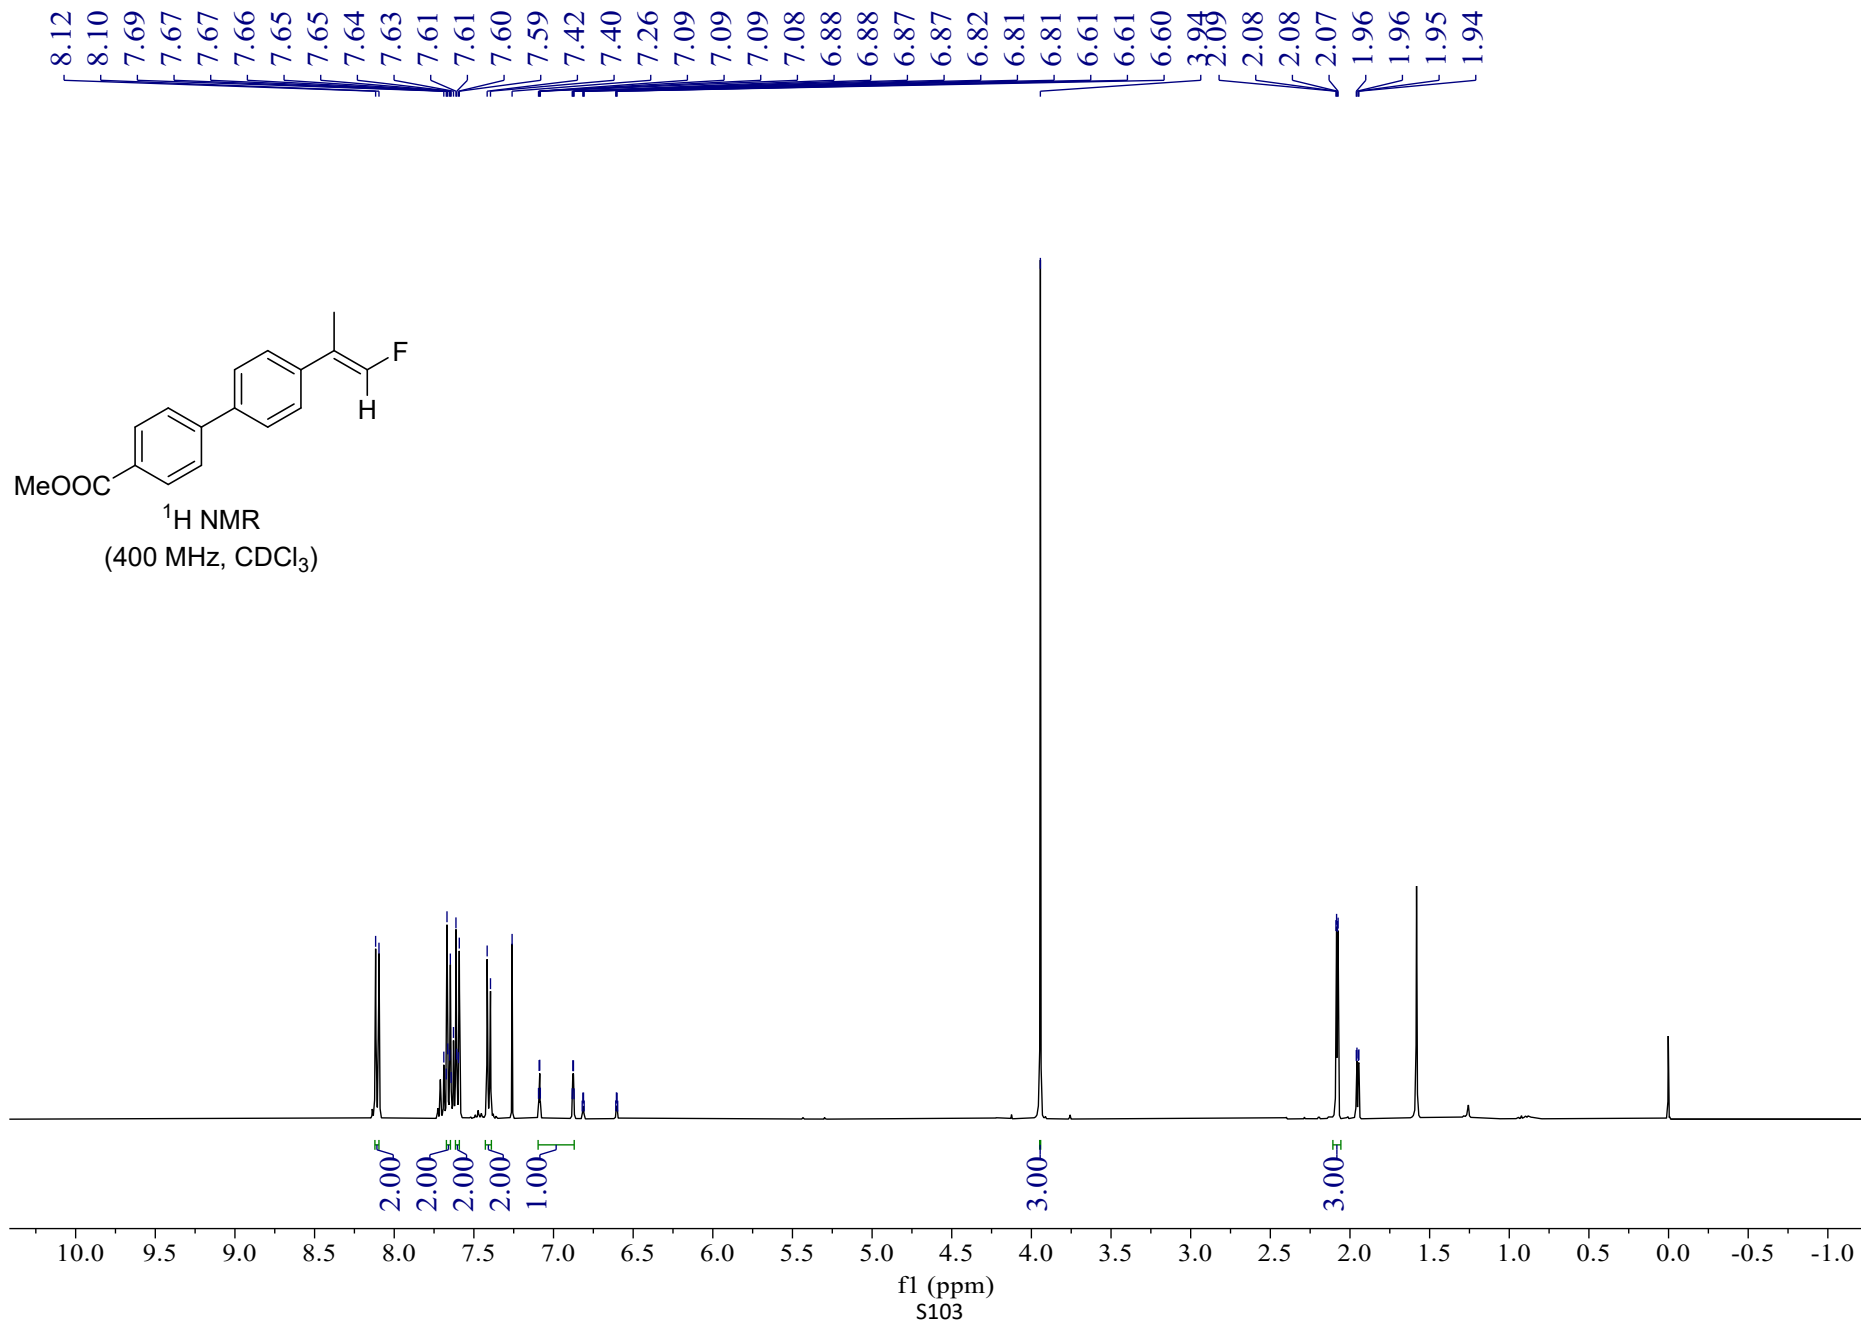

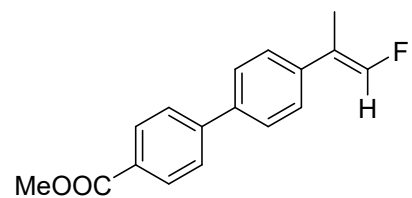

<sup>13</sup>C NMR  
(101 MHz, CDCl<sub>3</sub>)

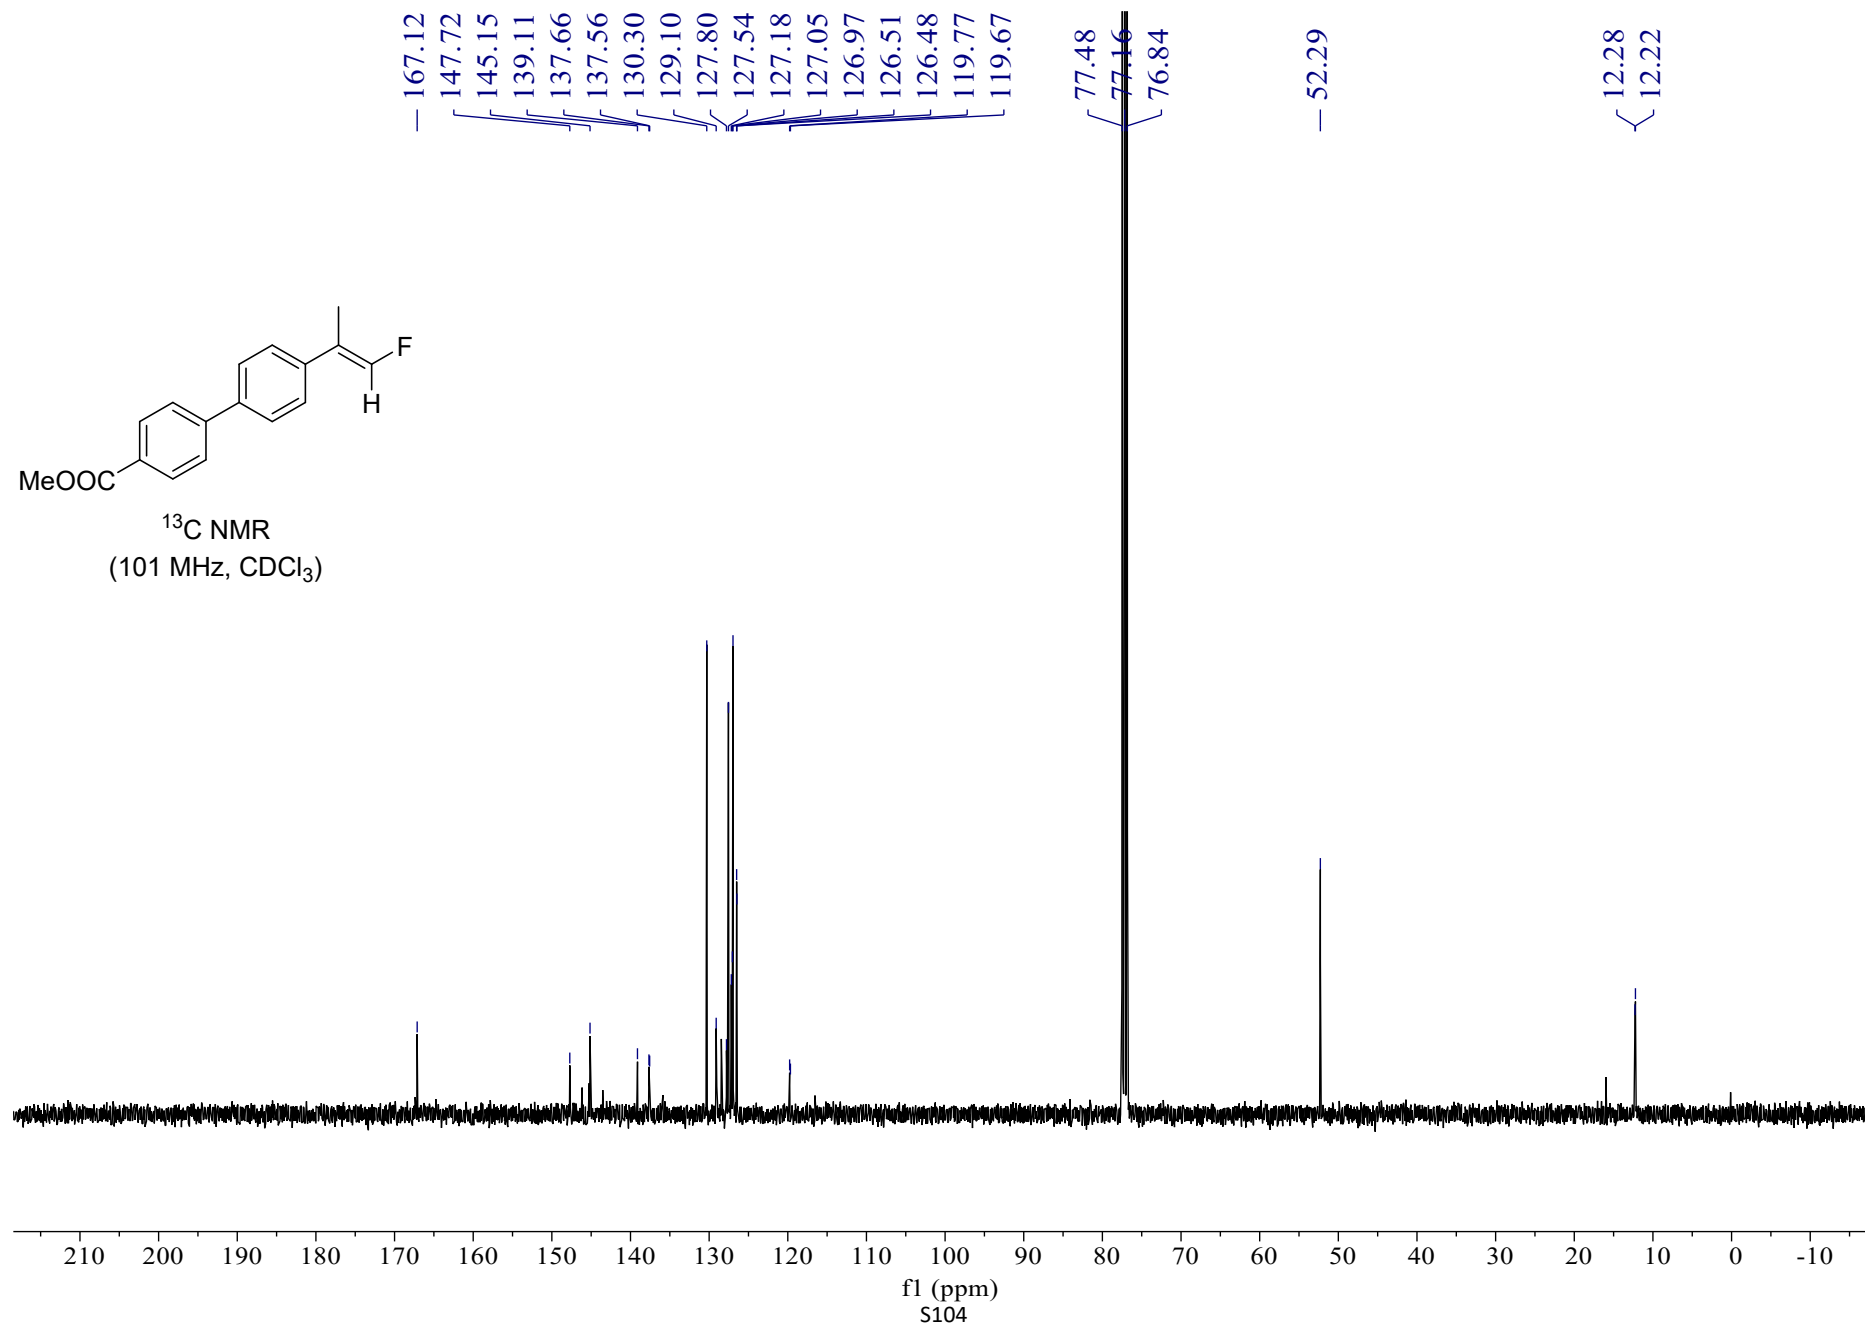

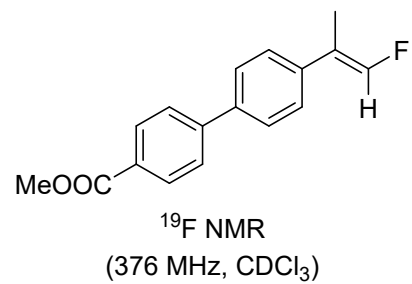

-127.52  
-127.53  
-127.54  
-127.56  
-127.74  
-127.75  
-127.77  
-127.78  
-130.04  
-130.05  
-130.06  
-130.07  
-130.26  
-130.27  
-130.28  
-130.29

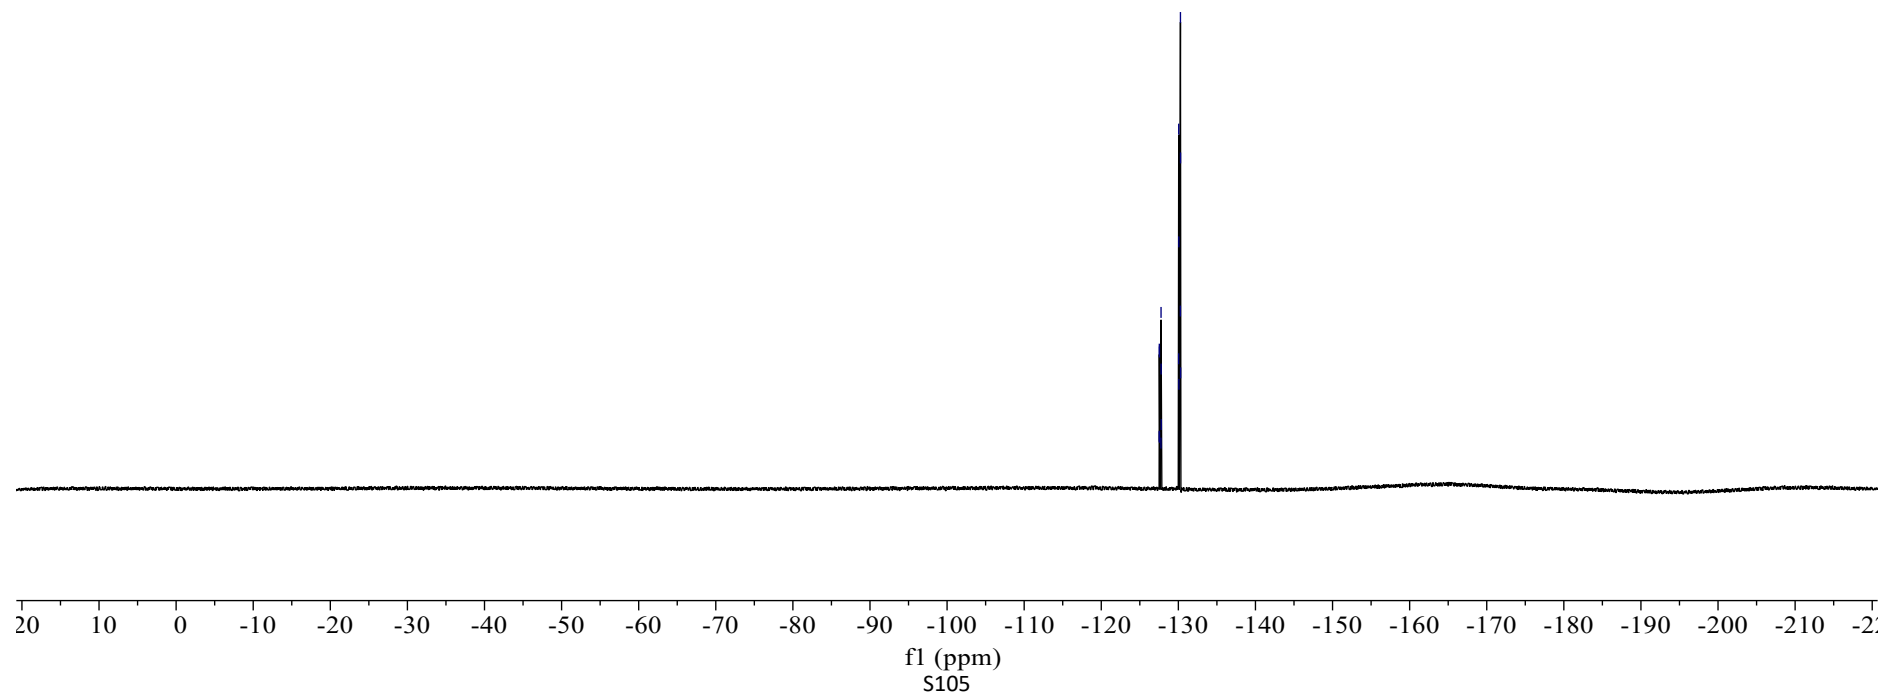

LX-2 #125 RT: 0.94 AV: 1 NL: 2.15E4  
 T: FTMS + p ESI Full ms [100.0000-1500.0000]

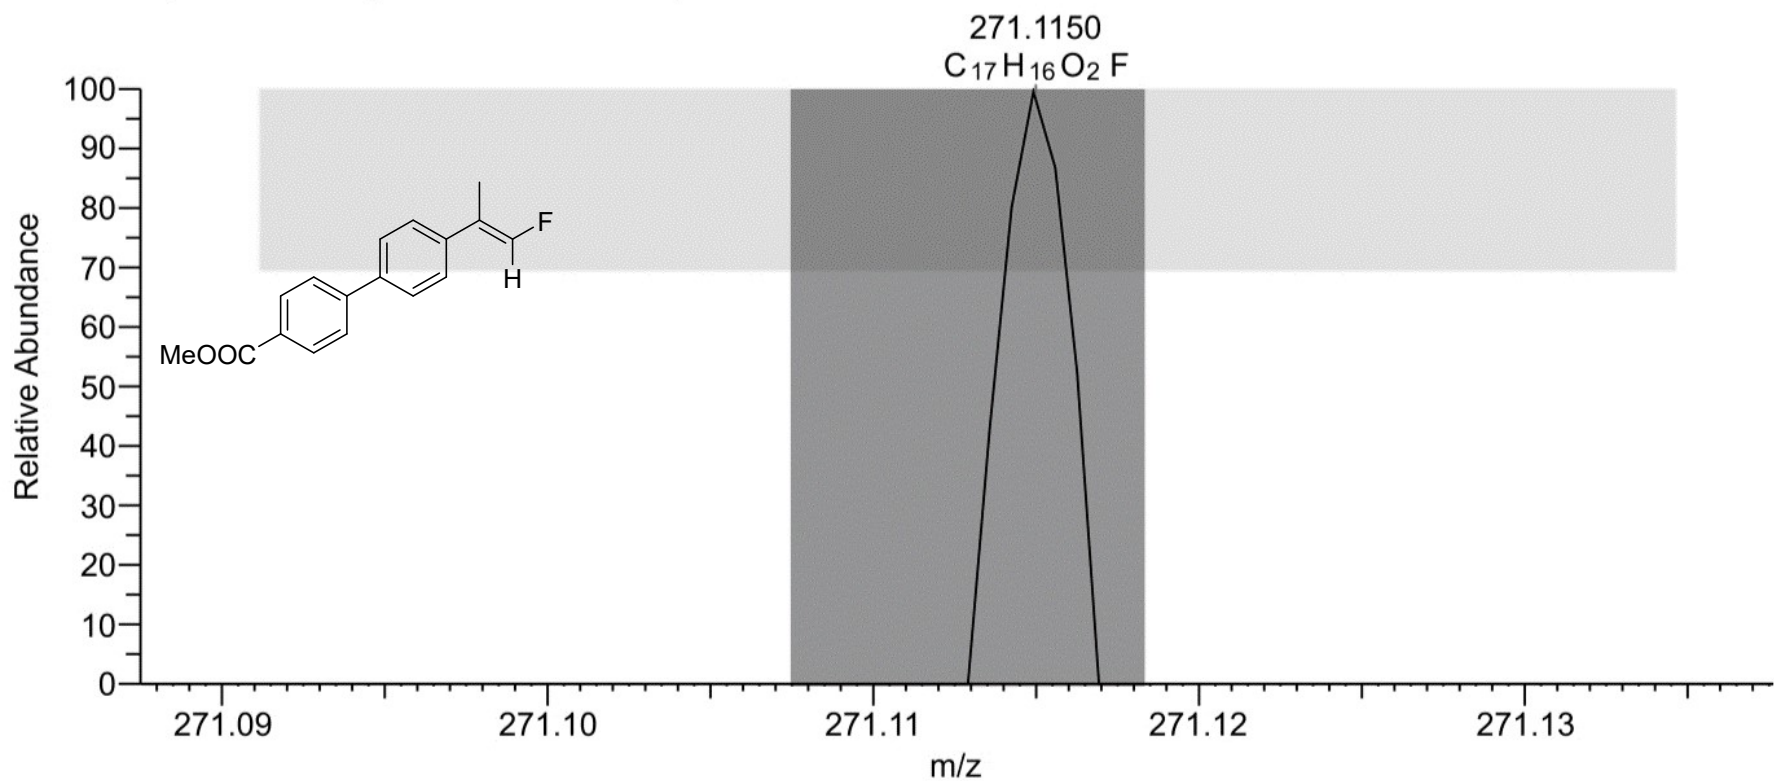

| Peak M... | Display...                                       | S Fit                    | RDB  | Delta [p... | Theo....  | Rank | Combin... | # Matc... | # Misse... | MS Cov... | Pattern... | MSMS...       |
|-----------|--------------------------------------------------|--------------------------|------|-------------|-----------|------|-----------|-----------|------------|-----------|------------|---------------|
| 271.1150  | C <sub>17</sub> H <sub>16</sub> O <sub>2</sub> F | 72.5392<br>394954<br>232 | 9.50 | 7.77        | 271.11288 | 1    | 98.55     | 1         | 0          | 100       | 100        | (Collect ion) |

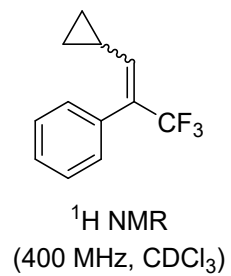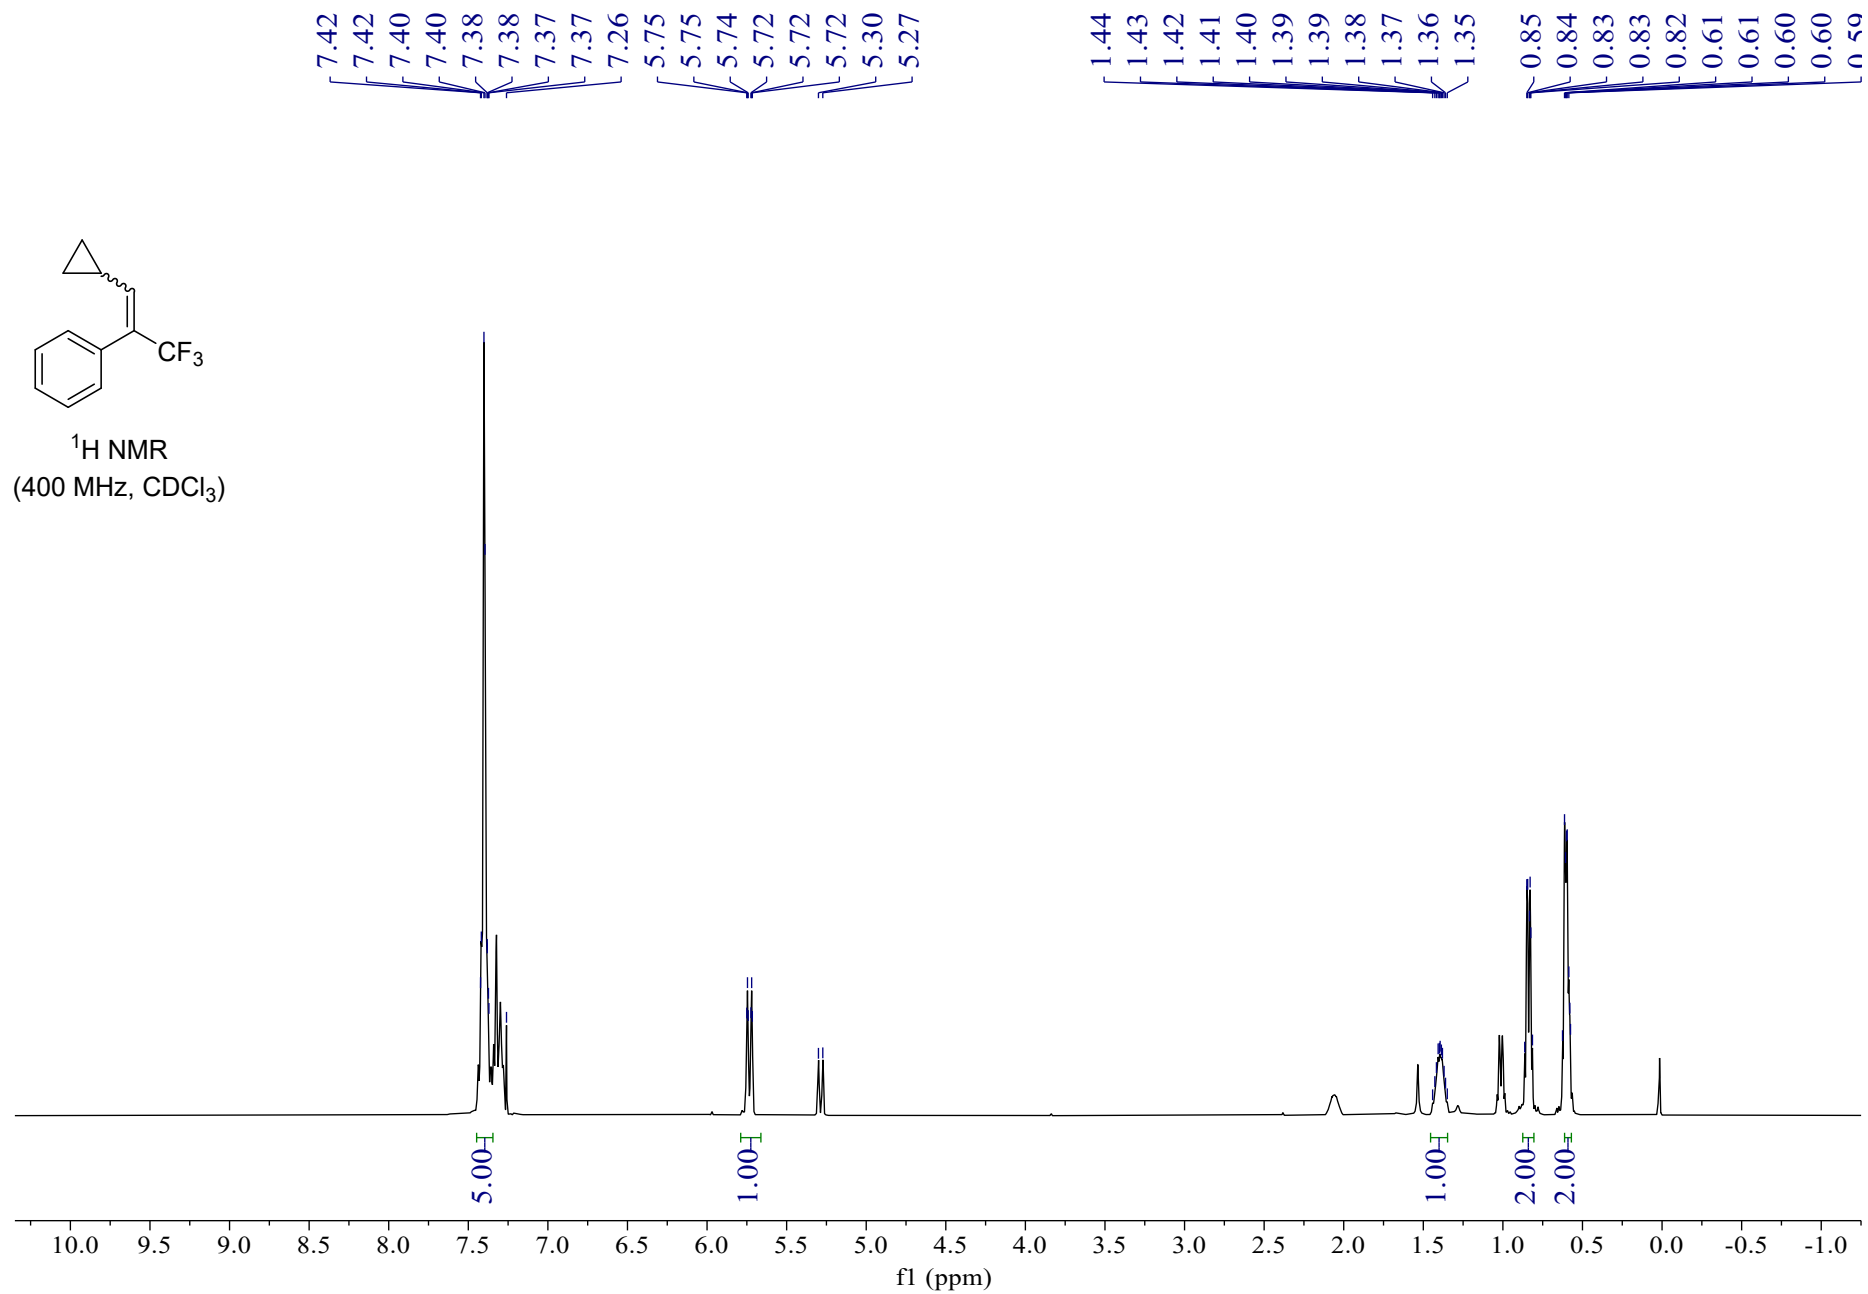

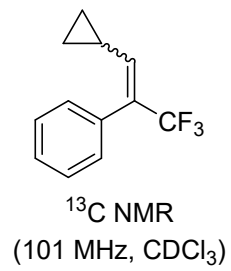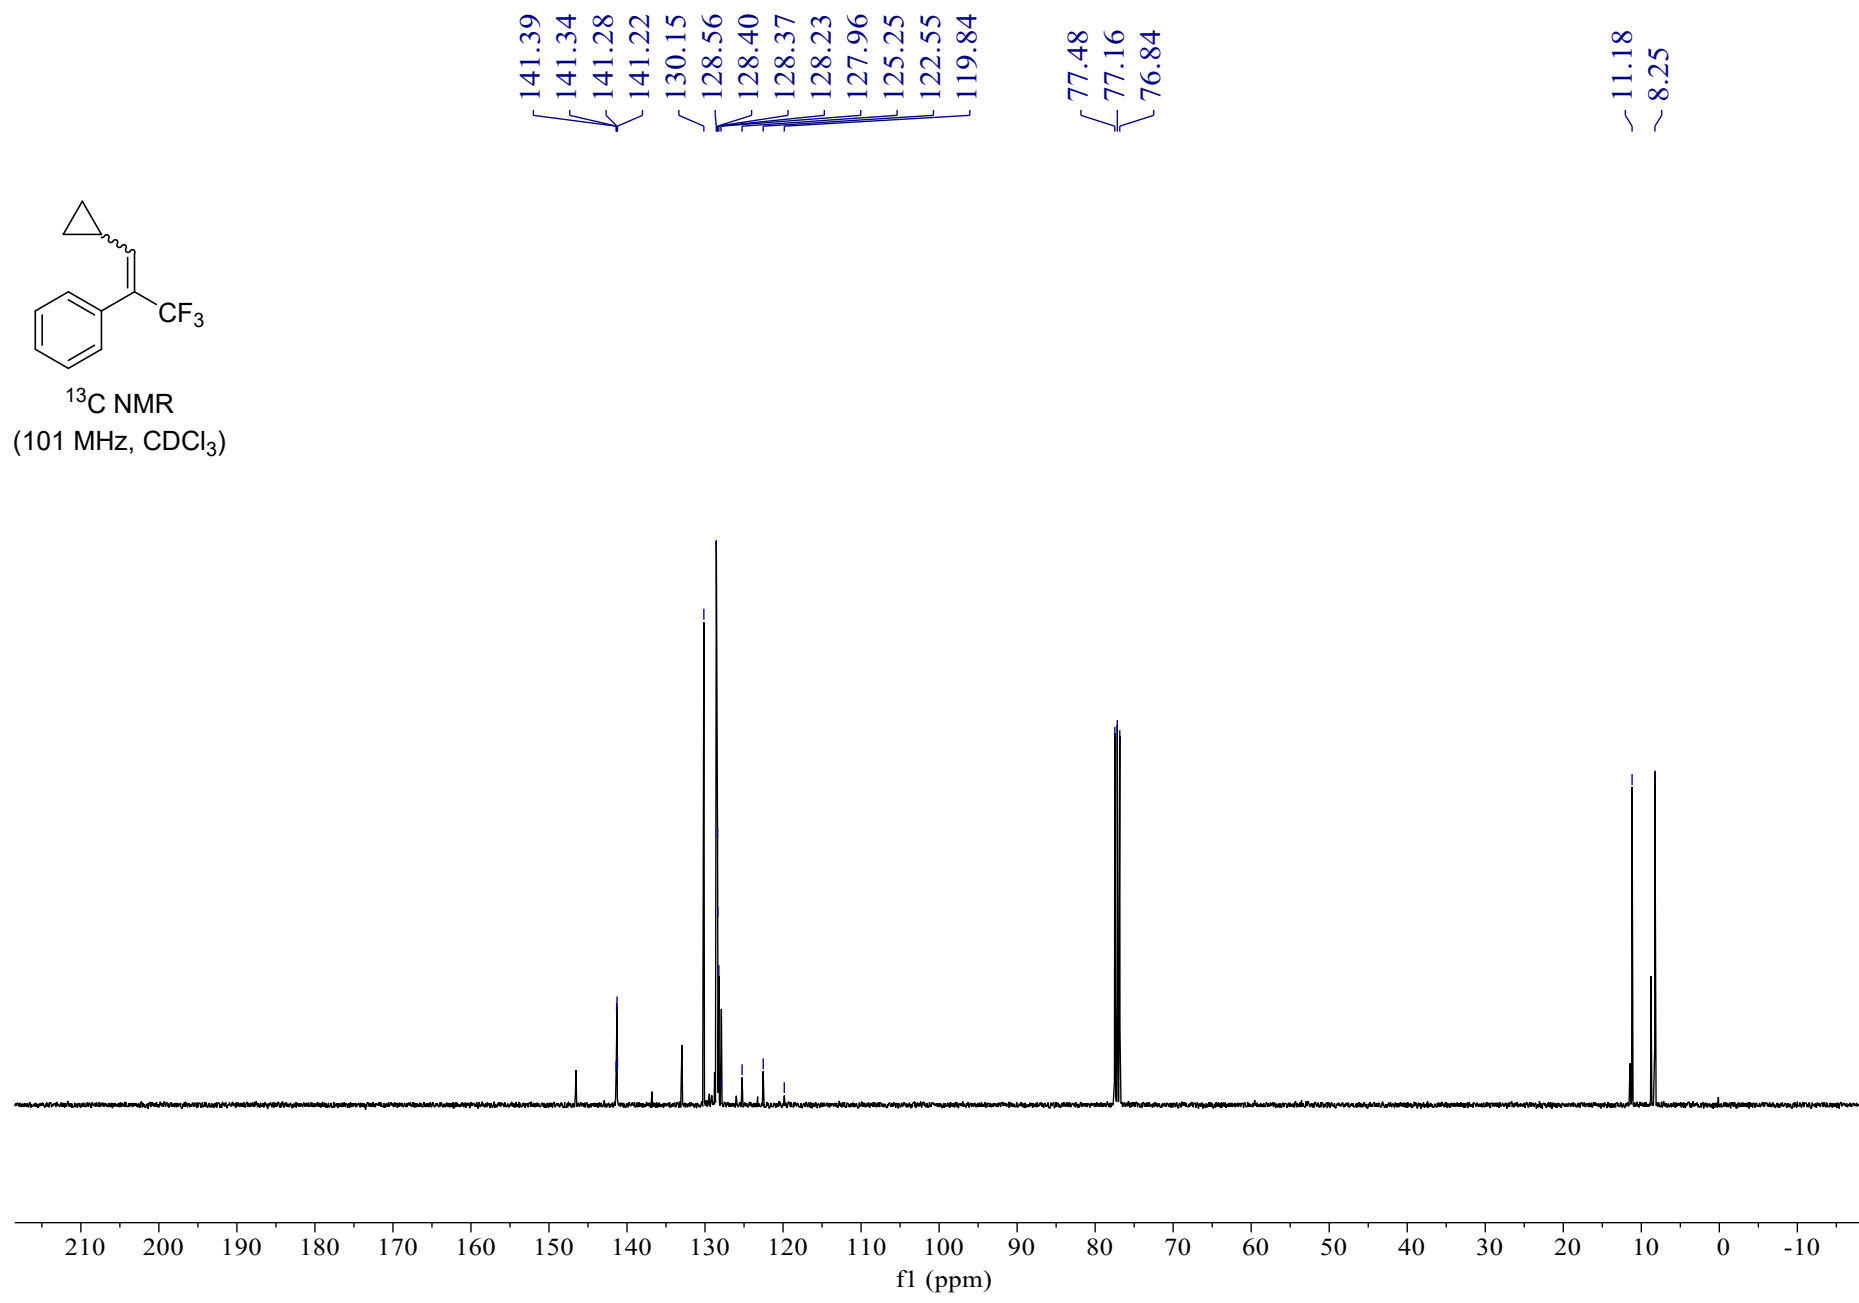



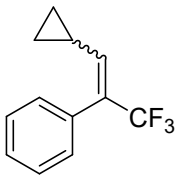

<sup>19</sup>F NMR  
(376 MHz, CDCl<sub>3</sub>)

-- -57.07  
-- -64.99

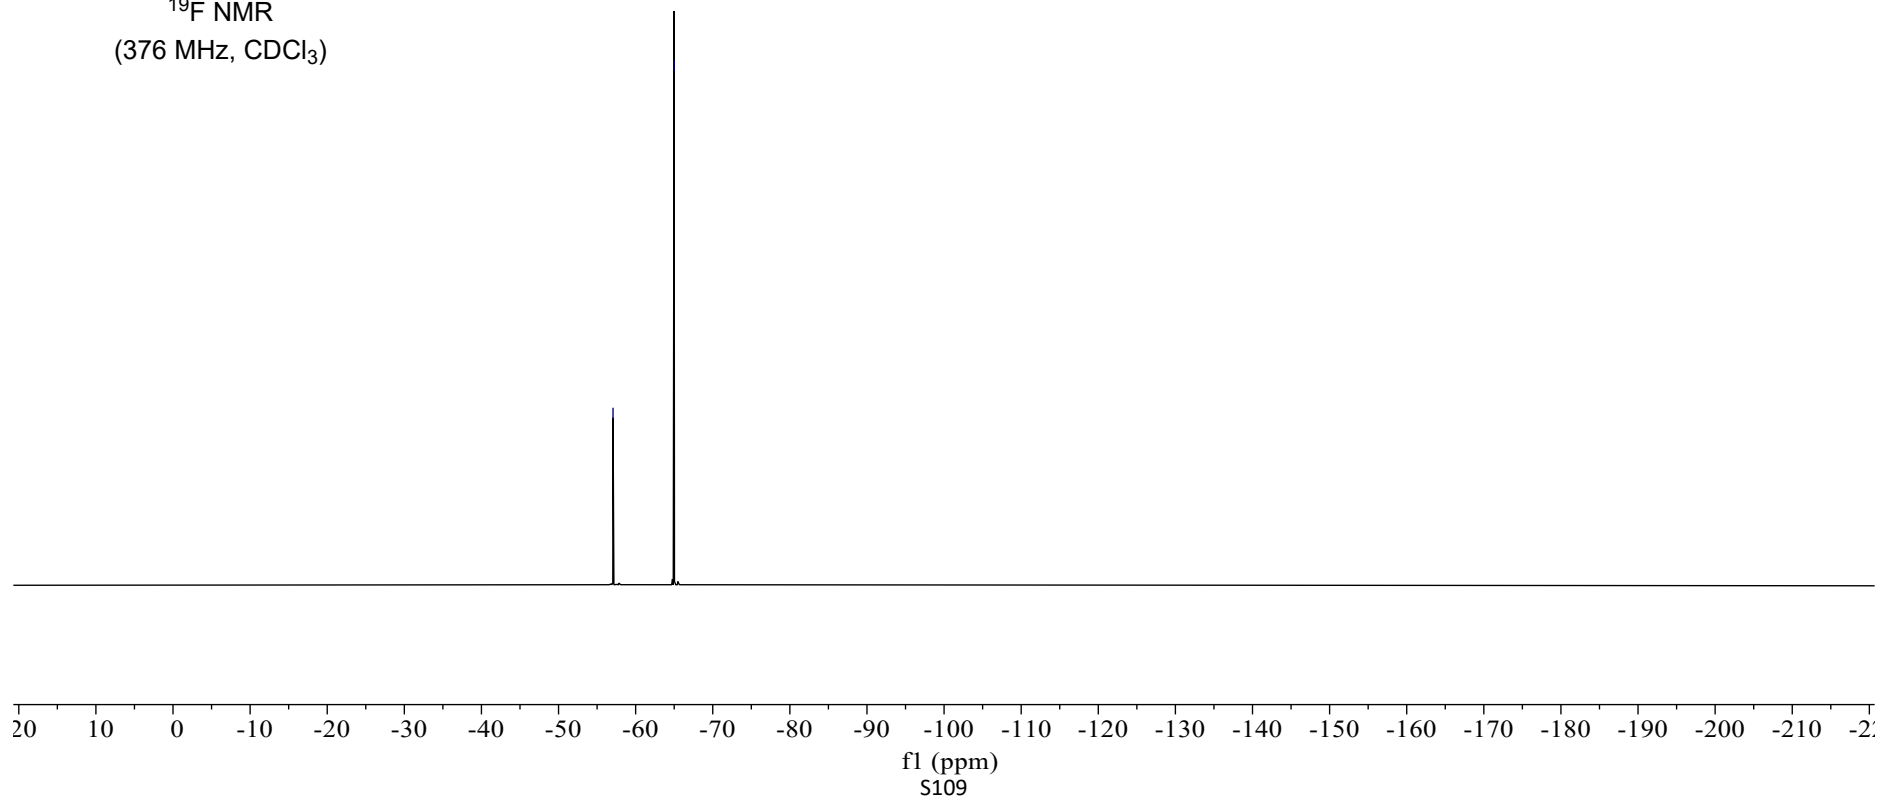

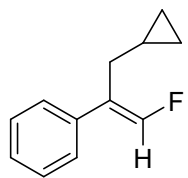

<sup>1</sup>H NMR  
(400 MHz, CDCl<sub>3</sub>)

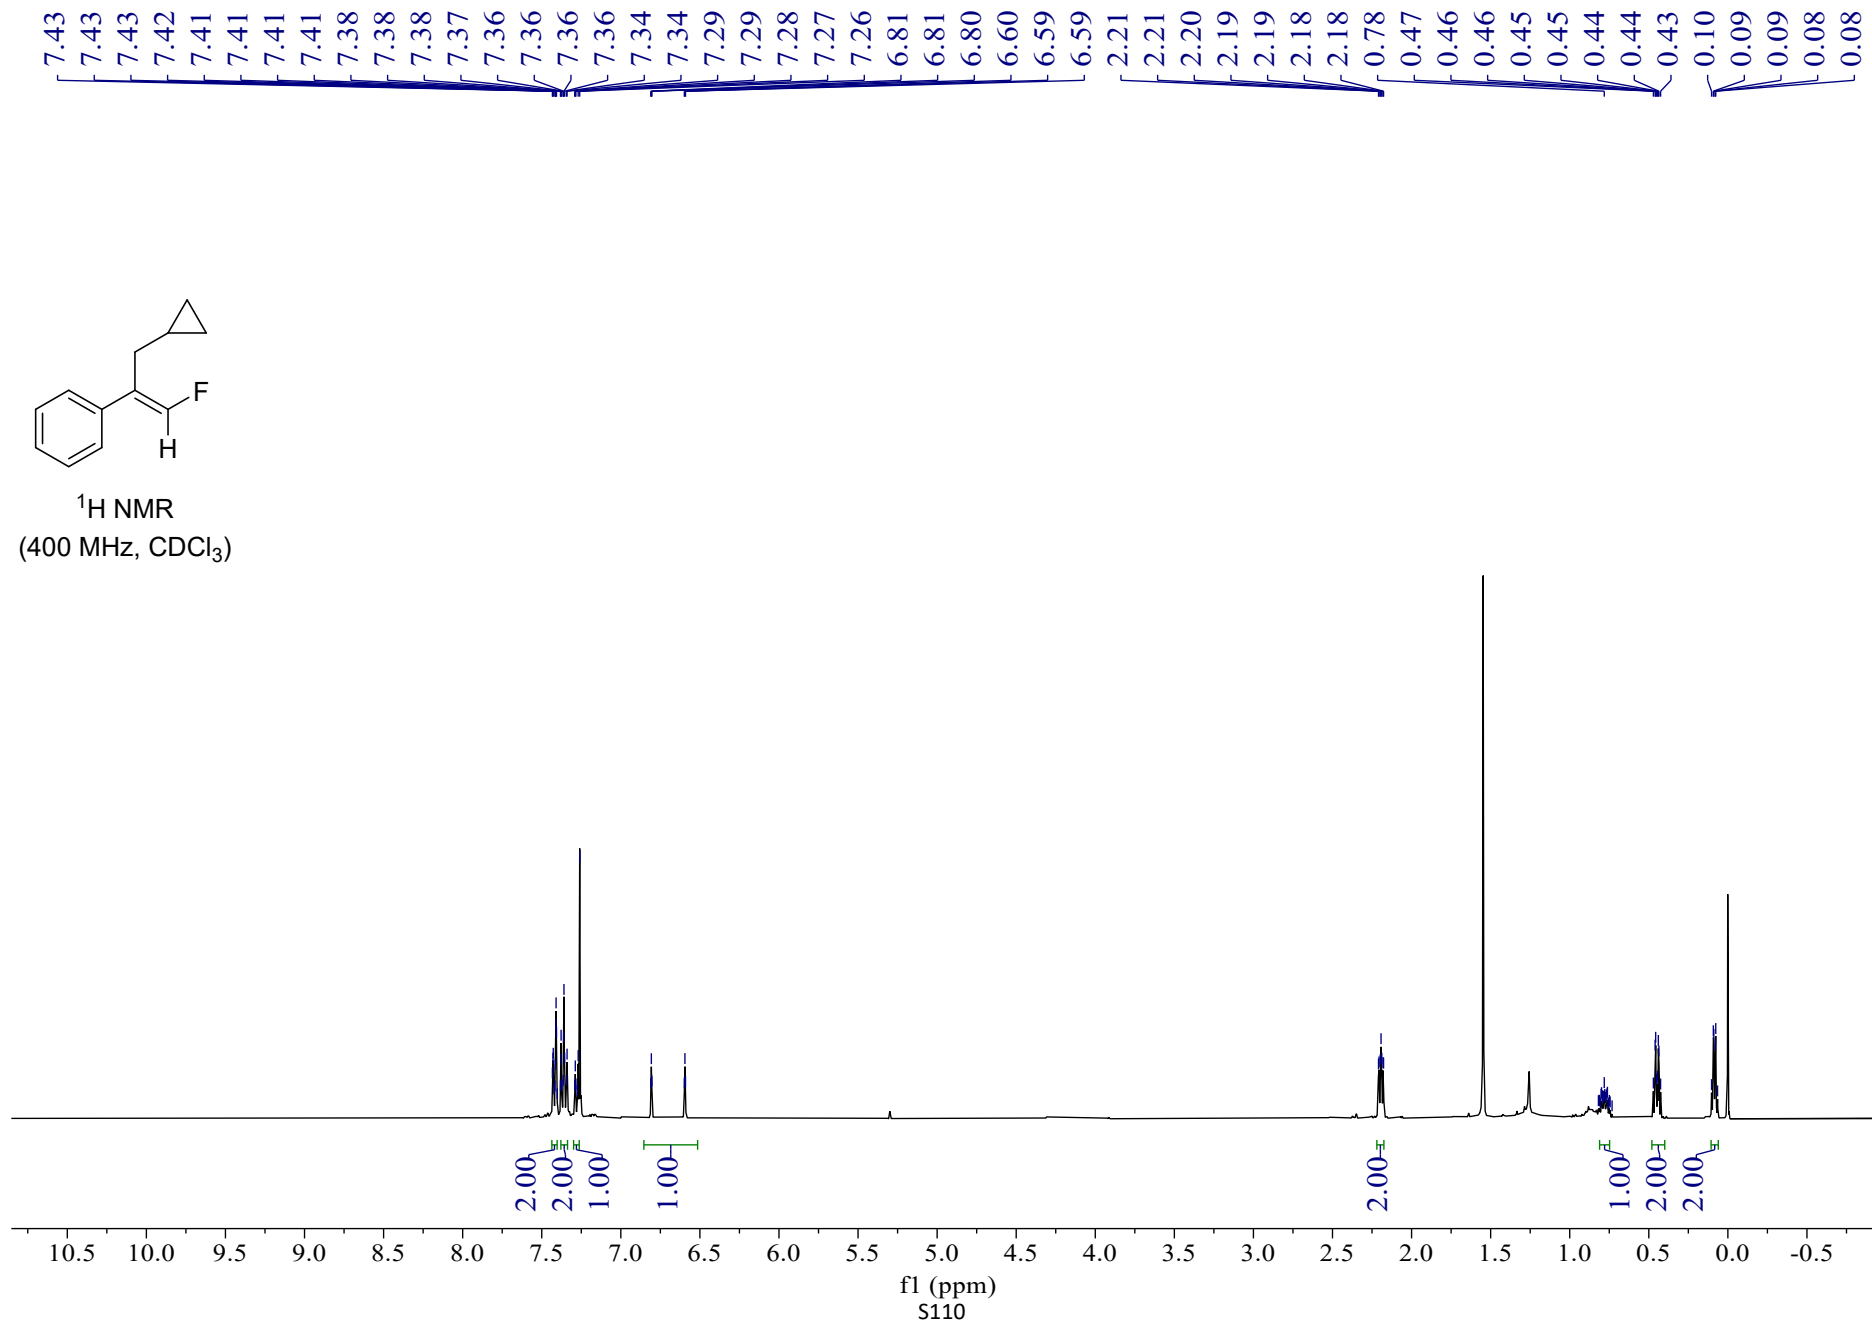

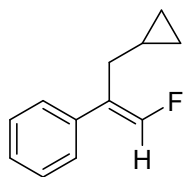

<sup>13</sup>C NMR  
(151 MHz, CD<sub>2</sub>Cl<sub>2</sub>)

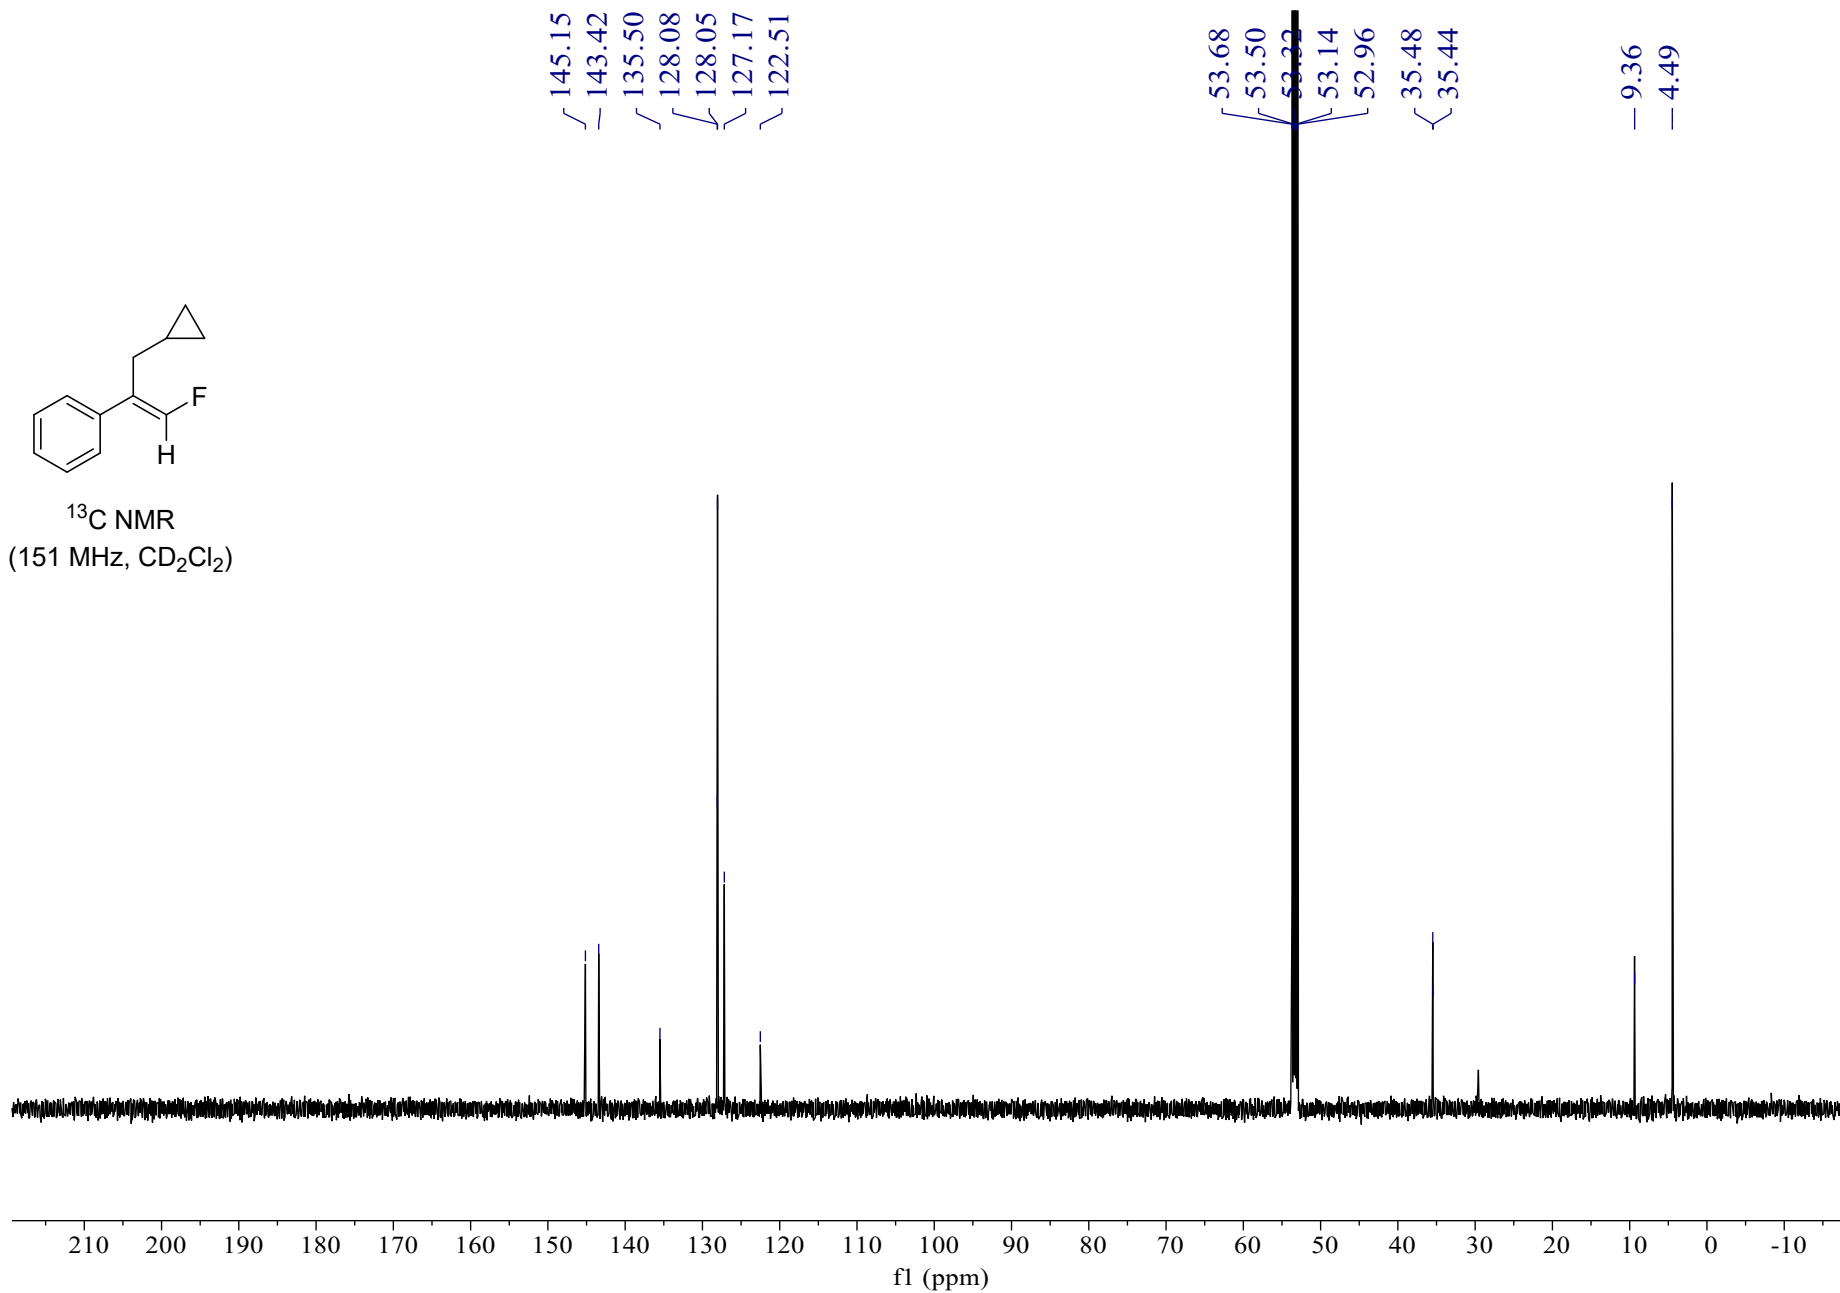

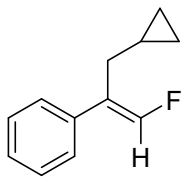

$^{19}\text{F}$  NMR  
(376 MHz,  $\text{CDCl}_3$ )

-133.14  
-133.15  
-133.16  
-133.36  
-133.37  
-133.38

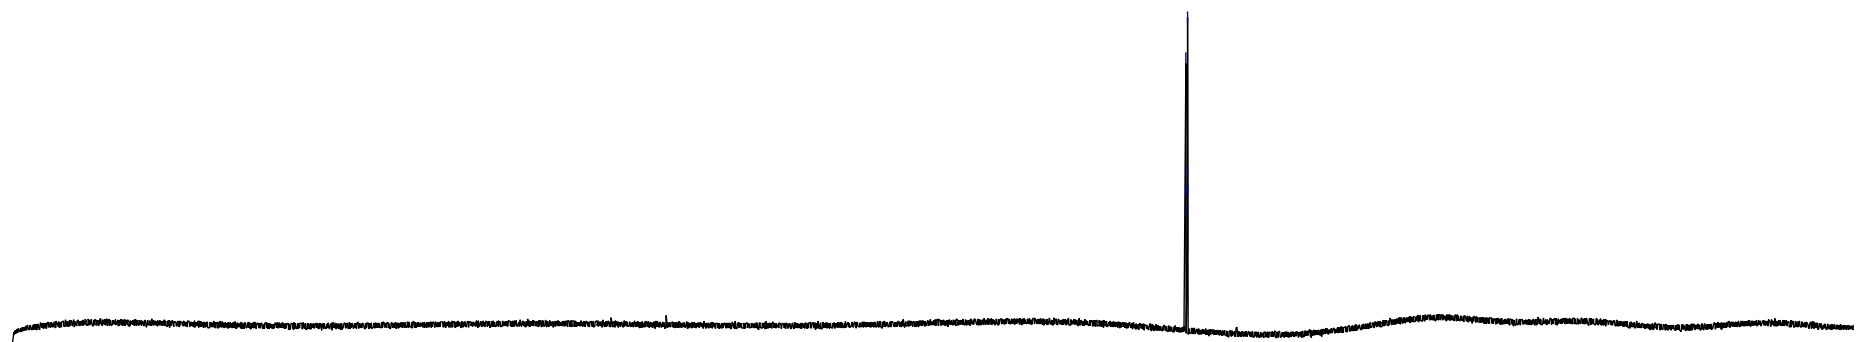

20 10 0 -10 -20 -30 -40 -50 -60 -70 -80 -90 -100 -110 -120 -130 -140 -150 -160 -170 -180 -190 -200 -210 -220

f1 (ppm)

S112

lx-99 #7 RT: 0.05 AV: 1 NL: 1.04E5  
 T: FTMS + p ESI Full ms [100.0000-1500.0000]

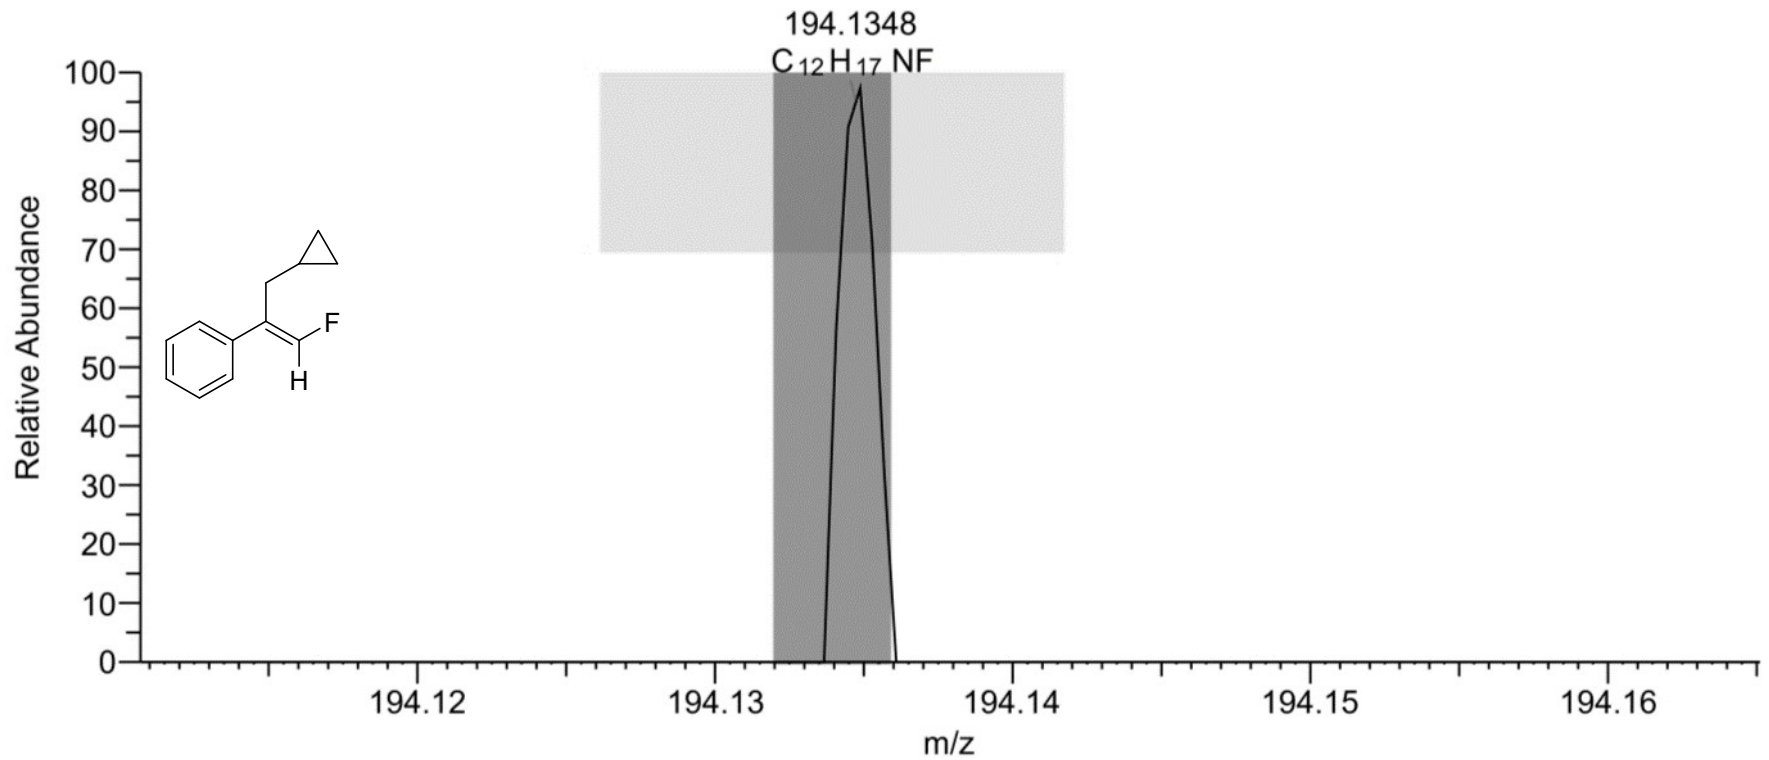

| Peak M...    | Display...           | S Fit                    | RDB  | Delta [p... | Theo....      | Rank | Combin... | # Matc... | # Misse... | MS Cov... | Pattern... | MSMS...          |
|--------------|----------------------|--------------------------|------|-------------|---------------|------|-----------|-----------|------------|-----------|------------|------------------|
| 194.134<br>8 | $C_{12}H_{17}N$<br>F | 69.8931<br>630229<br>455 | 4.50 | 4.26        | 194.133<br>95 | 1    | 98.42     | 1         | 0          | 100       | 100        | (Collect<br>ion) |

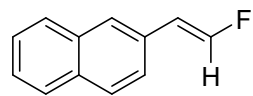

<sup>1</sup>H NMR  
(400 MHz, CDCl<sub>3</sub>)

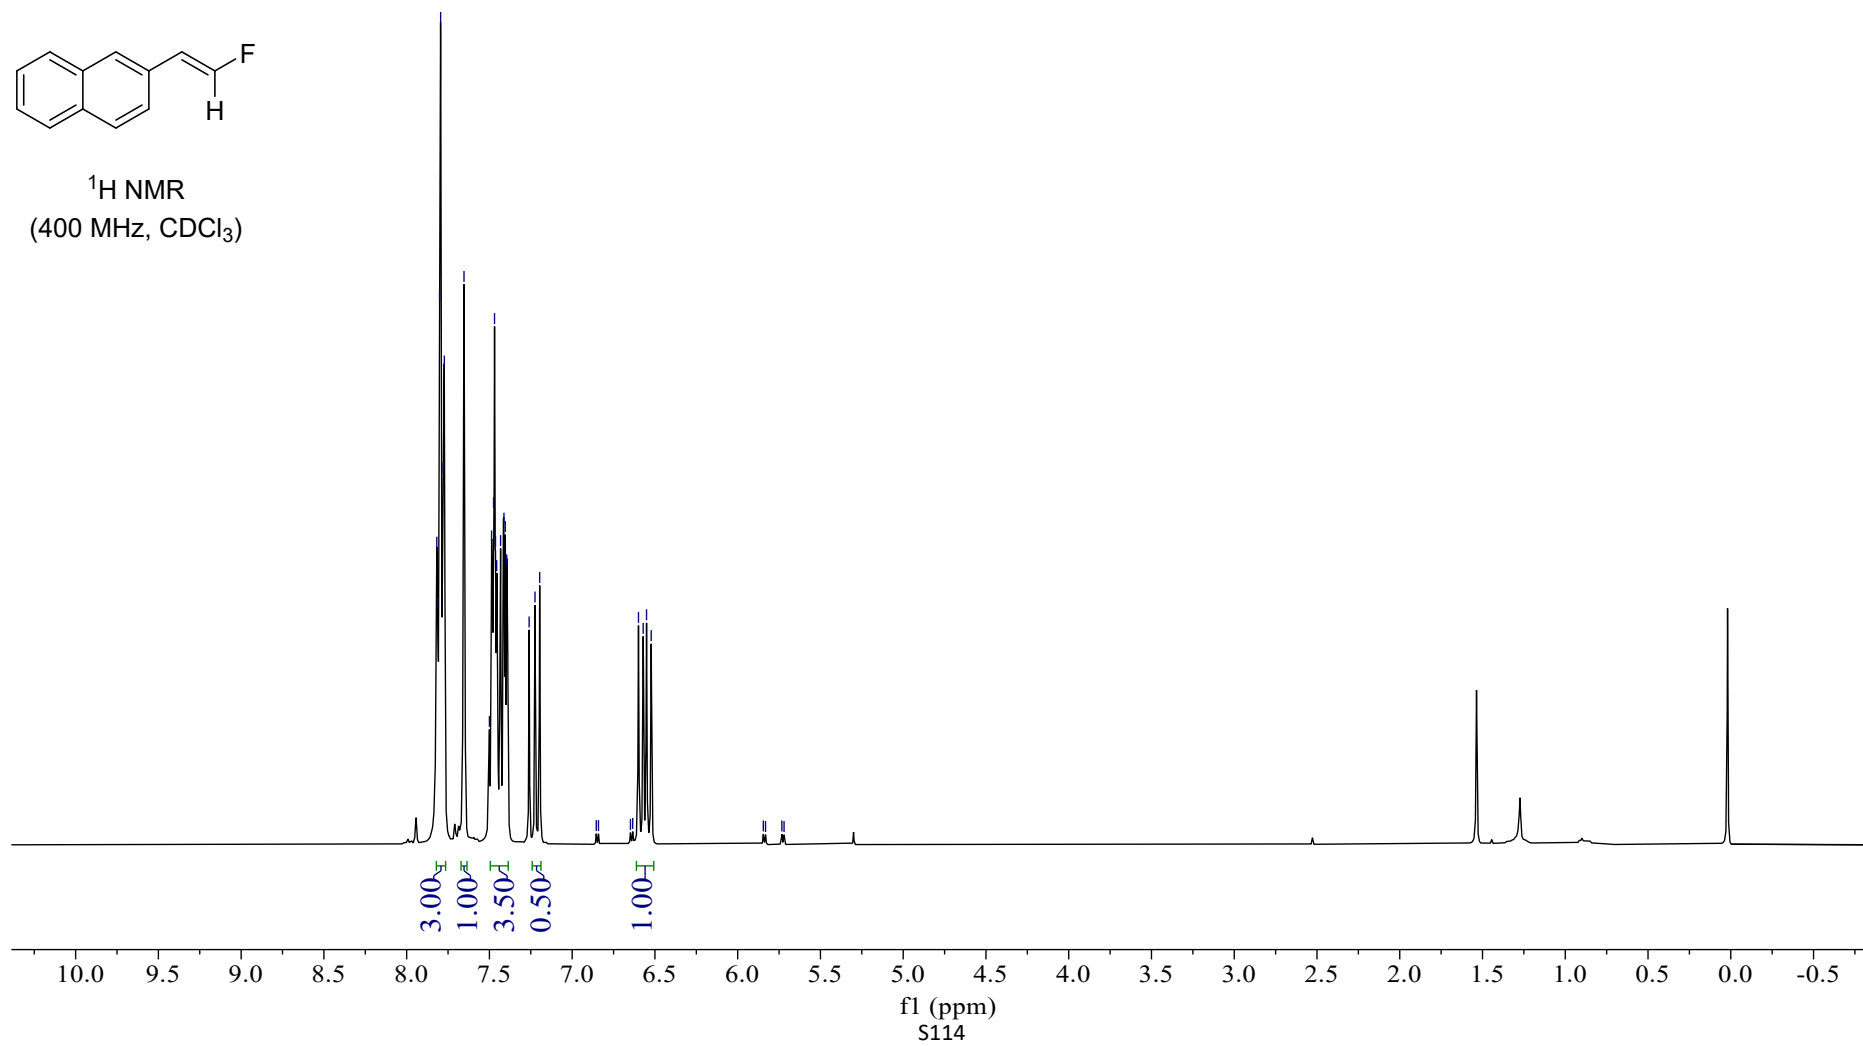

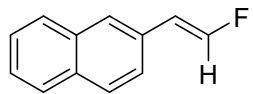

<sup>13</sup>C NMR  
(101 MHz, CDCl<sub>3</sub>)

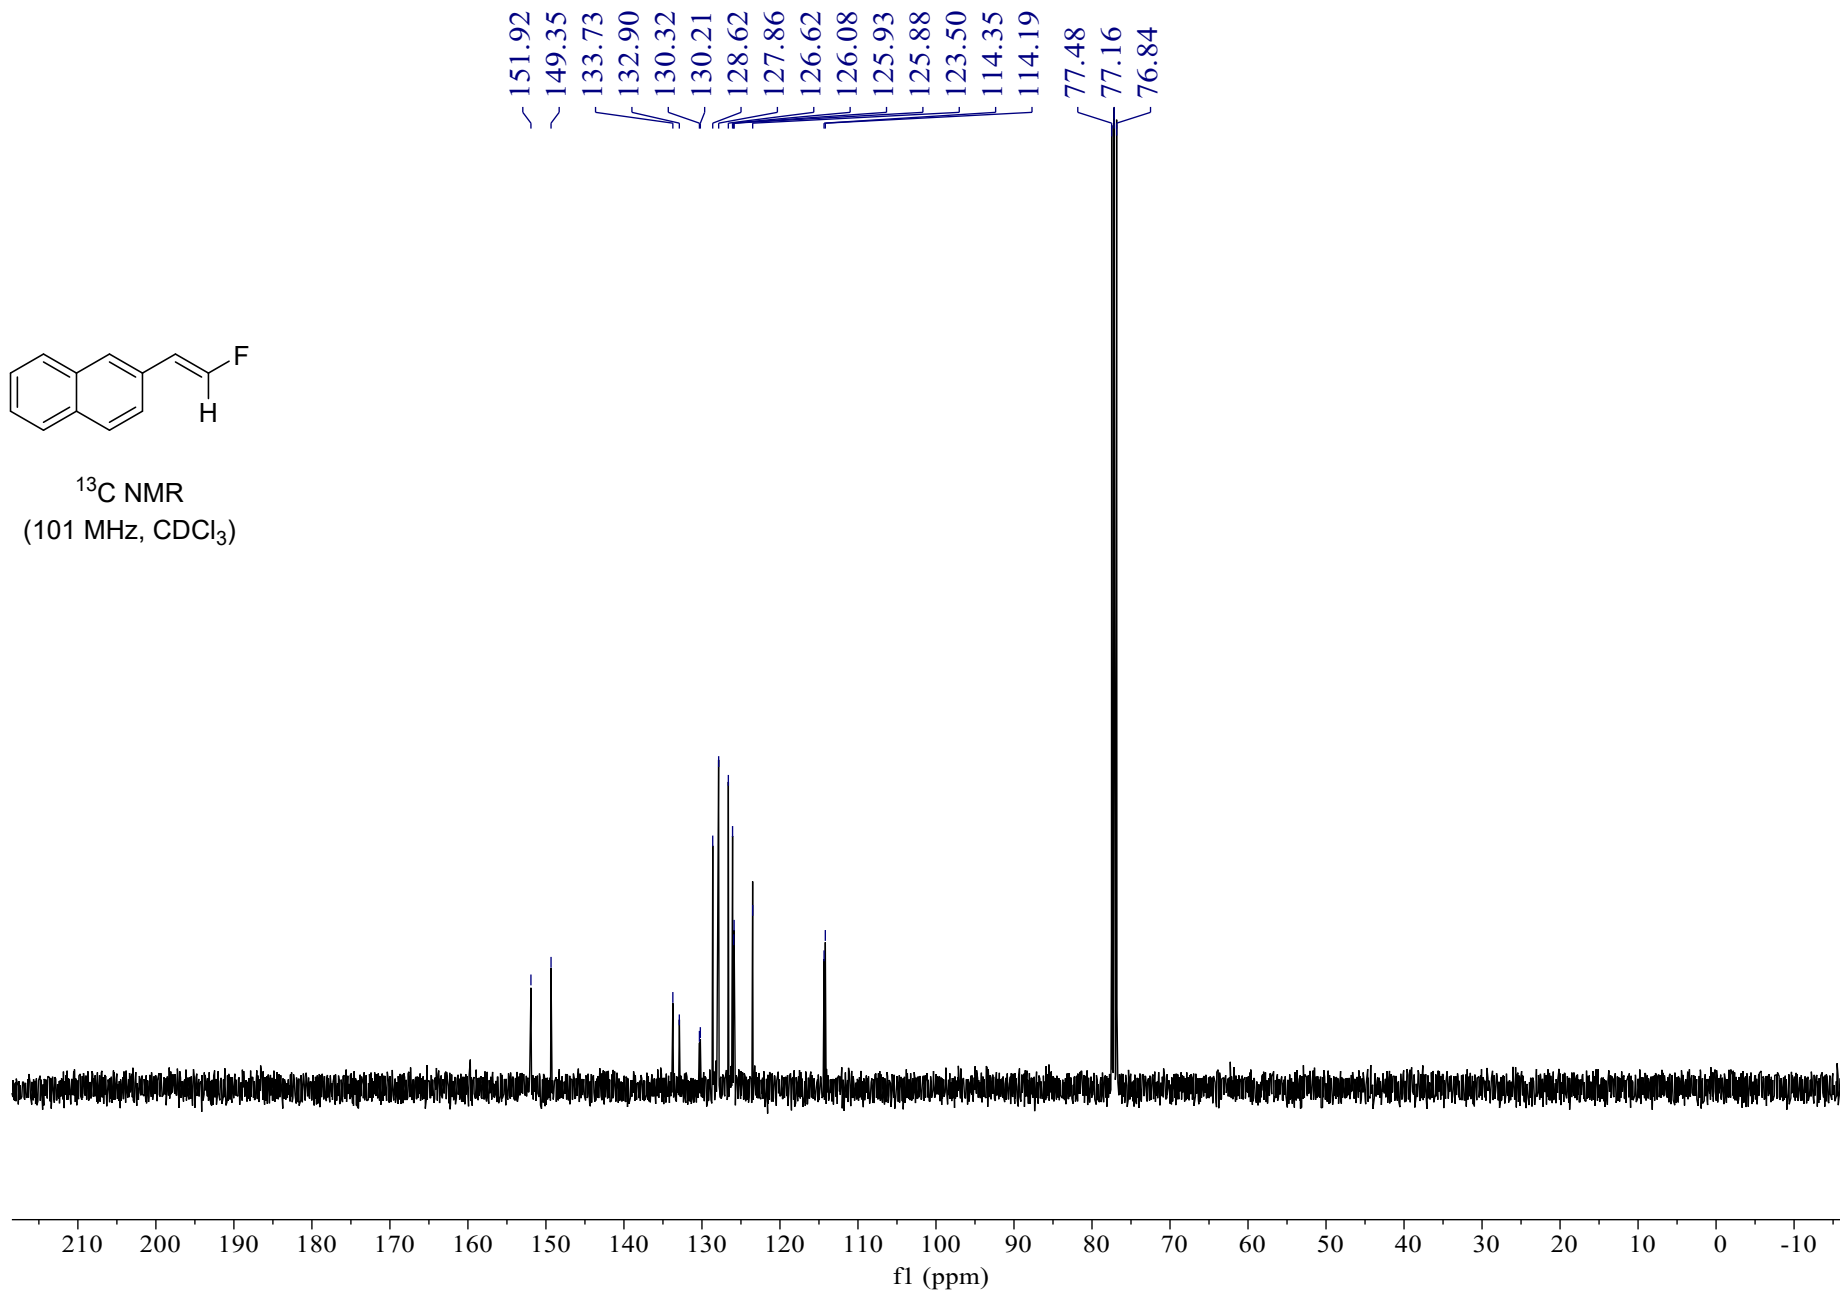

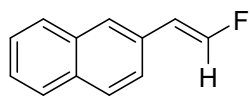

<sup>19</sup>F NMR  
(376 MHz, CDCl<sub>3</sub>)

-121.57  
-121.69  
-121.79  
-121.91  
-129.26  
-129.31  
-129.48  
-129.53

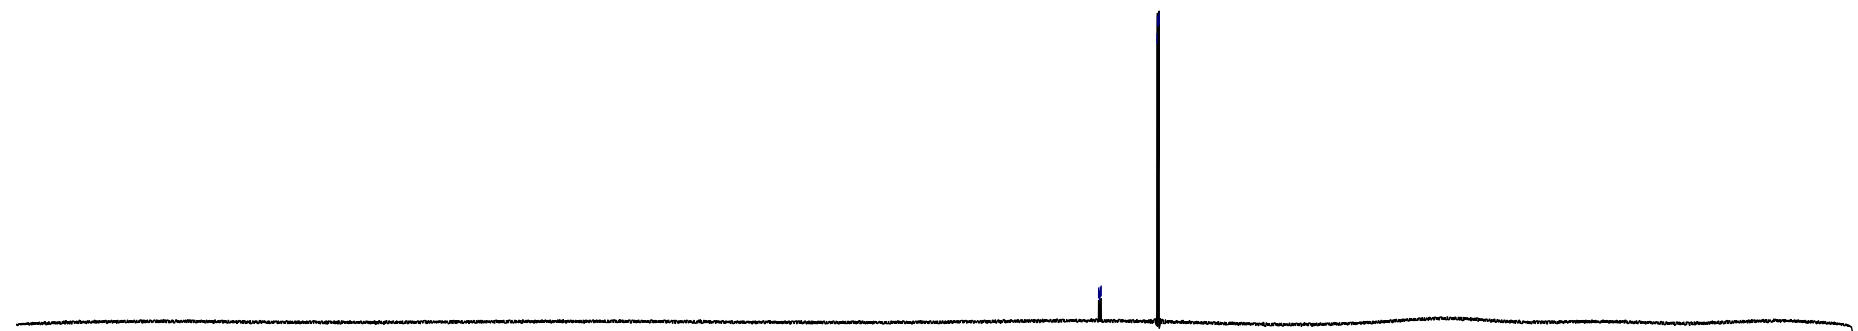

20 10 0 -10 -20 -30 -40 -50 -60 -70 -80 -90 -100 -110 -120 -130 -140 -150 -160 -170 -180 -190 -200 -210 -220

f1 (ppm)

S116



# Mass Spectrum SmartFormula Report

## Analysis Info

Analysis Name D:\LXMS\0411\_RA1\_01\_23192.d  
Method LC\_NO UV\_P50-1500\_6MIN.m  
Sample Name 0411

Acquisition D 2023-04-11 15:46:33

Operator Demo User  
Instrument compact 8255754.2017  
6

## Comment

## Acquisition Paramet

|             |            |               |          |                |           |
|-------------|------------|---------------|----------|----------------|-----------|
| Source Type | ESI        | Ion Polarity  | Positive | Set Nebulizer  | 3.0 Bar   |
| Focus       | Not active | Set Capillary | 4000 V   | Set Dry Heater | 200 °C    |
| Scan Begin  | 50 m/z     | Set End Plate | -500 V   | Set Dry Gas    | 8.0 l/min |

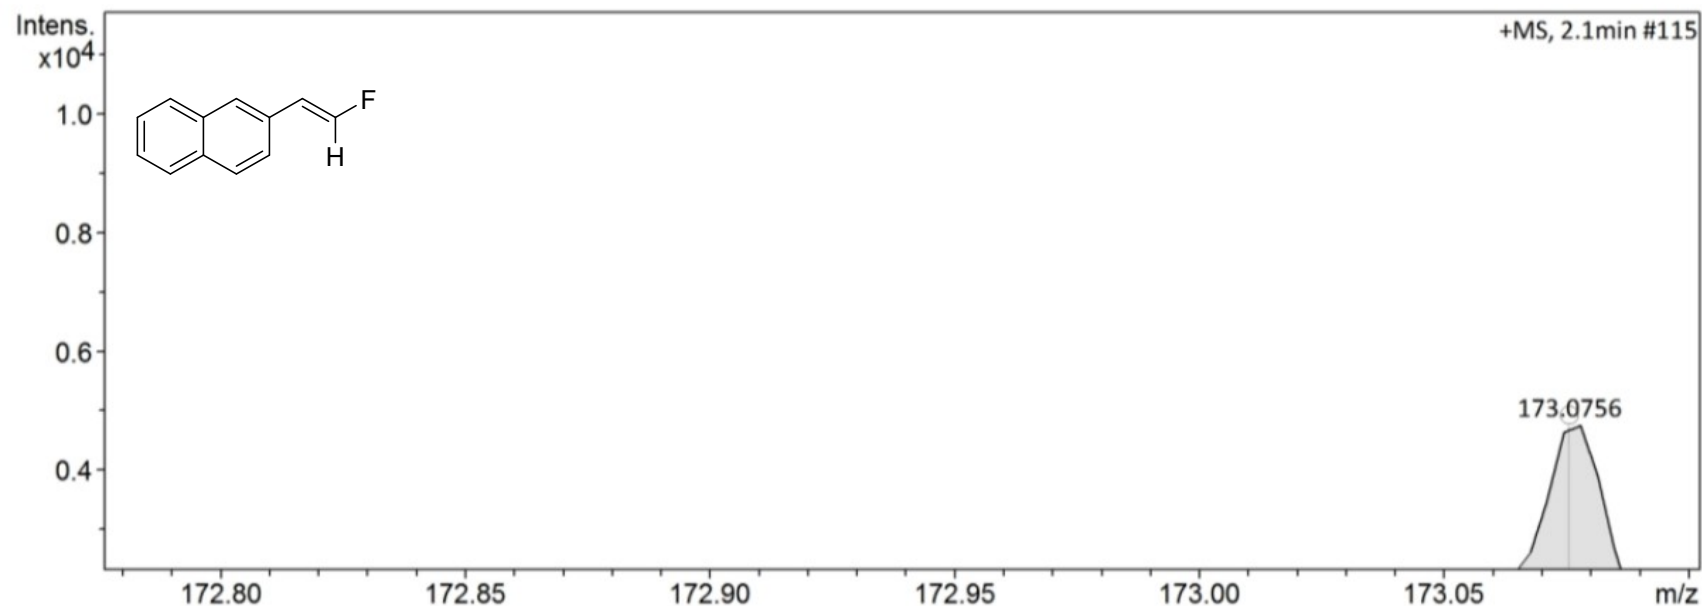

| Meas. m/z | # | Ion Formula | m/z      | err [ppm] | mSigma | # | mSigma | Score | rdb  | e <sub>i</sub> Y | Conf | N-Rule |
|-----------|---|-------------|----------|-----------|--------|---|--------|-------|------|------------------|------|--------|
| 173.0756  | 1 | C12H10F     | 173.0761 | 2.9       | 451.8  | 1 | 100.00 | 7.5   | even |                  |      | ok     |

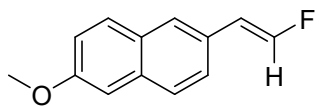

<sup>1</sup>H NMR  
(400 MHz, CDCl<sub>3</sub>)

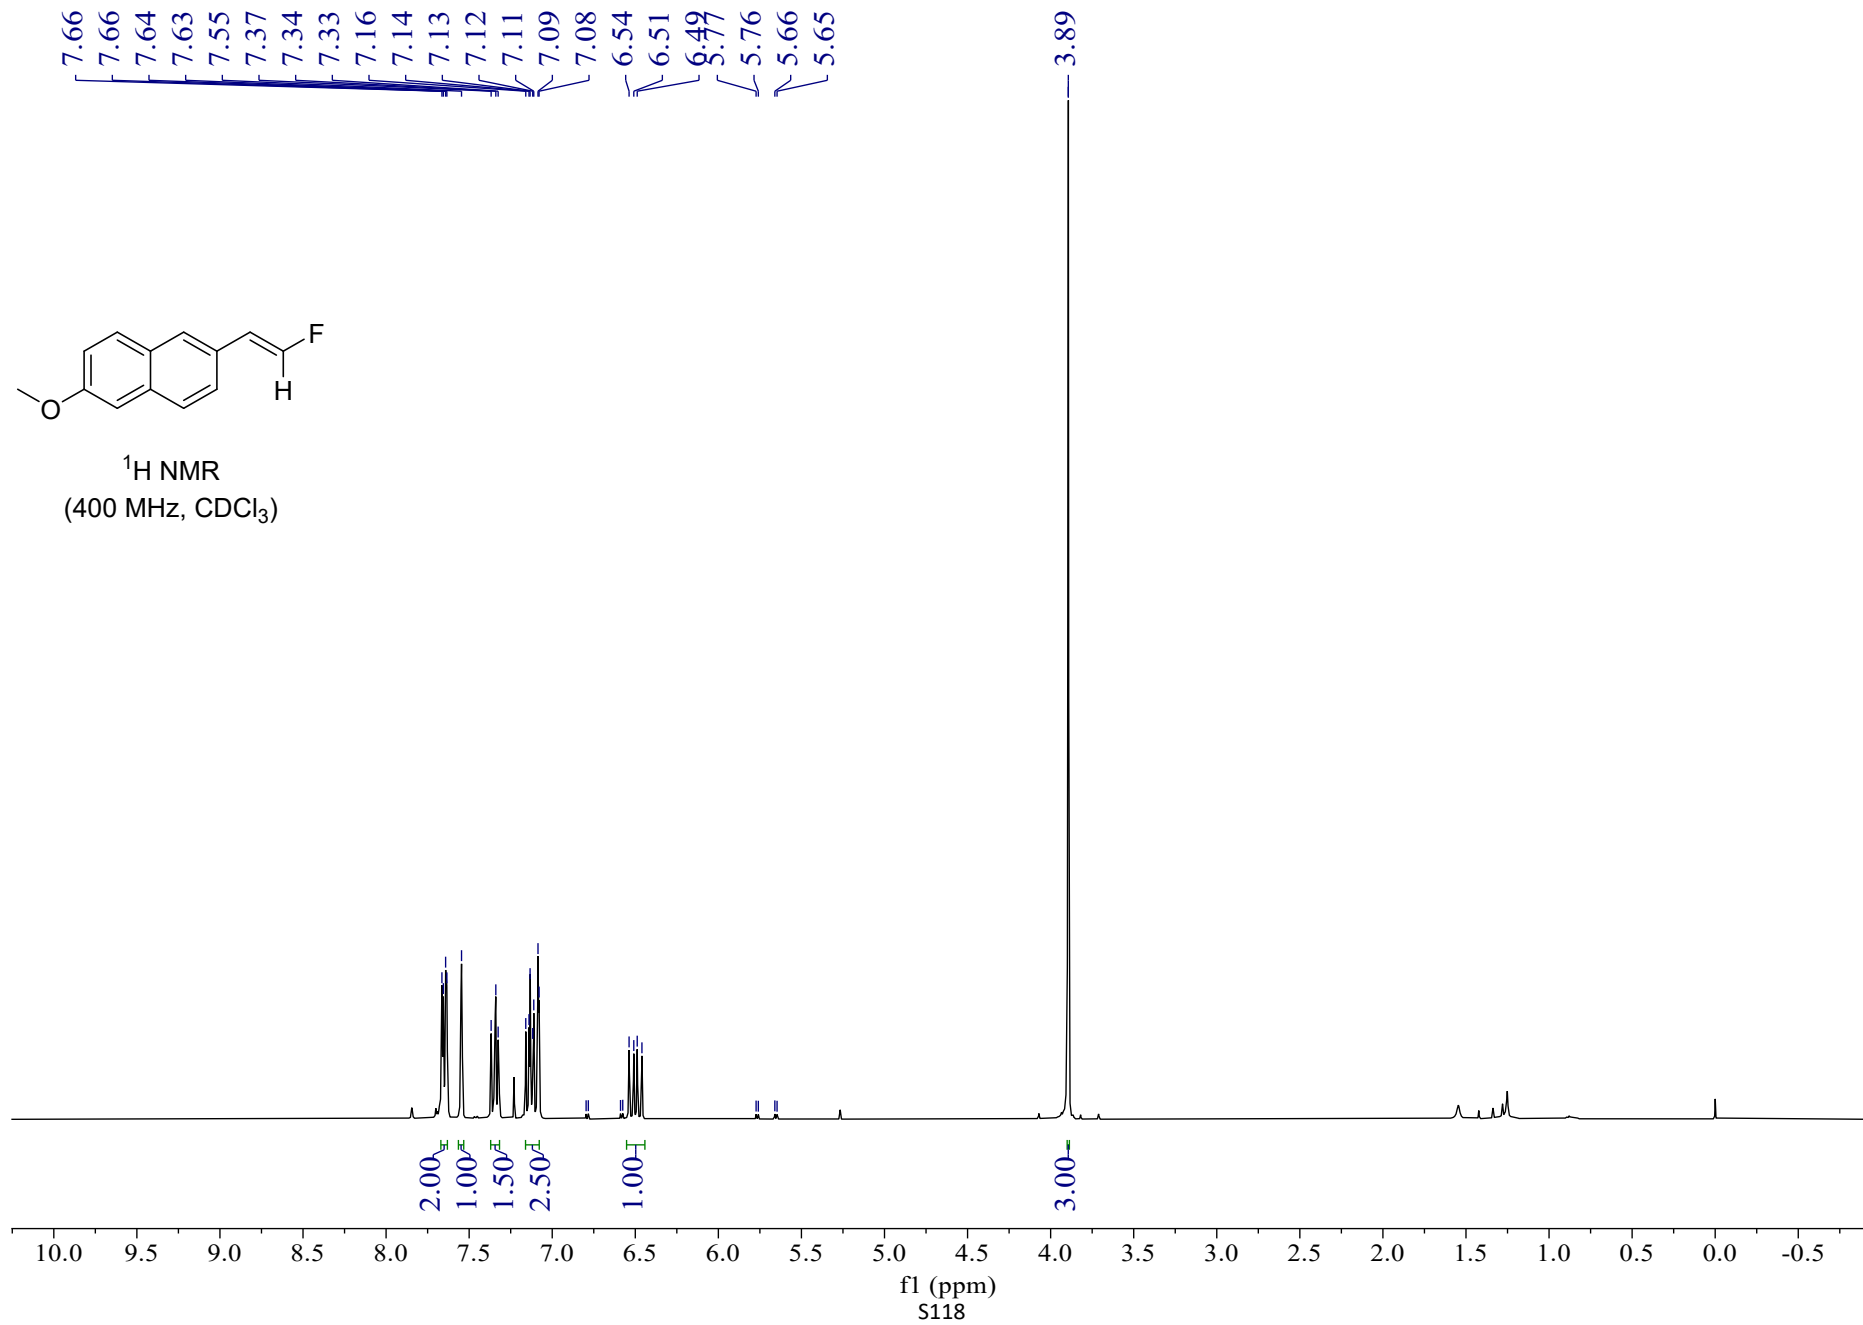

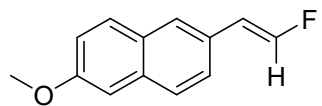

$^{13}\text{C}$  NMR  
(101 MHz,  $\text{CDCl}_3$ )

157.89  
151.34  
148.78  
134.05  
129.36  
129.14  
128.04  
127.92  
127.44  
125.72  
125.68  
124.06  
119.33  
114.29  
114.12  
105.98  
77.48  
77.16  
76.84  
55.42

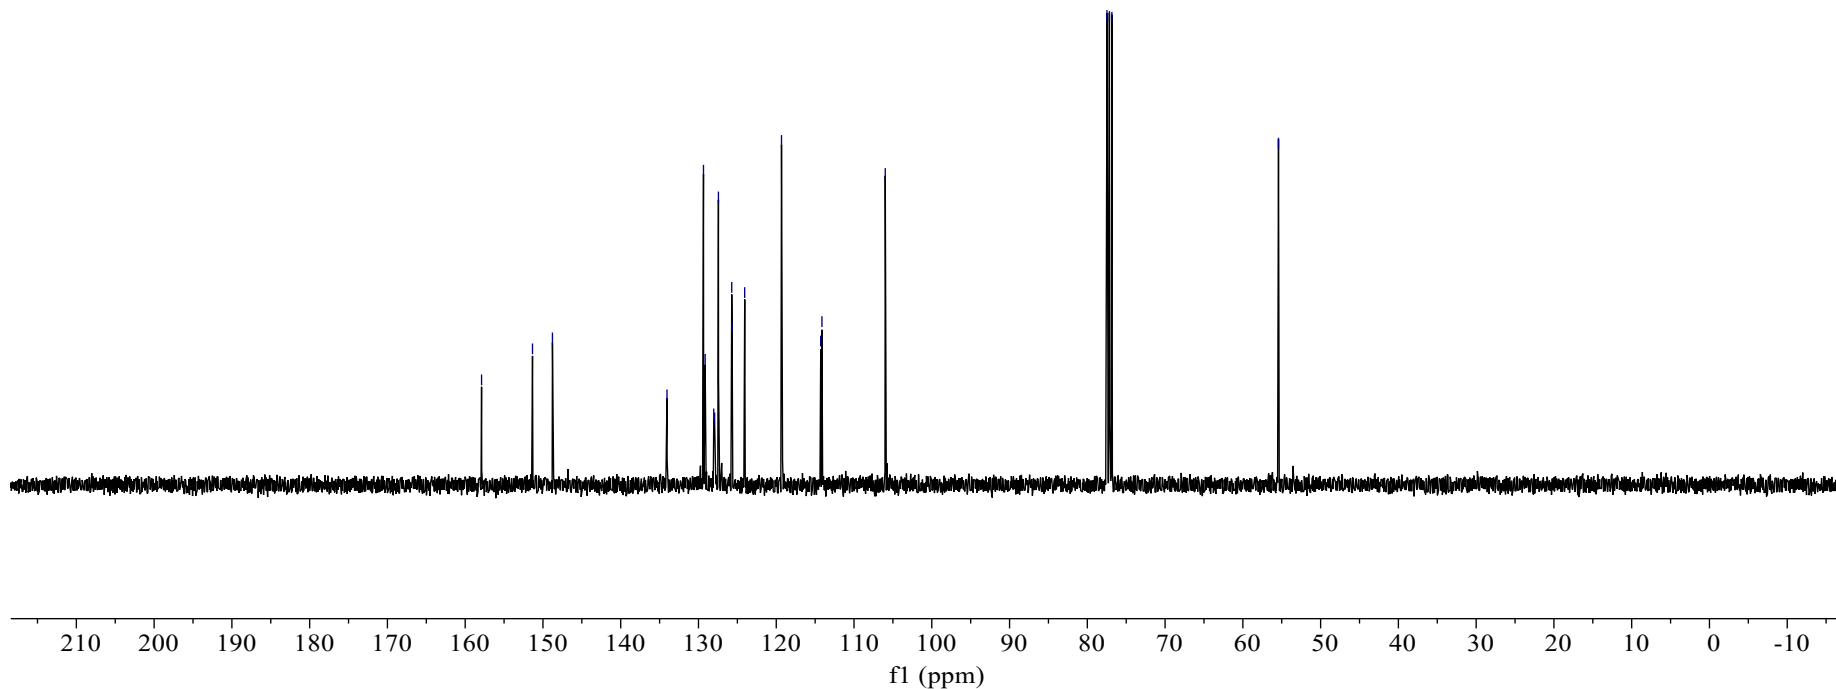

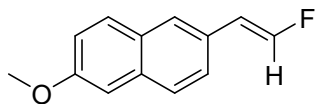

<sup>19</sup>F NMR  
(565 MHz, CDCl<sub>3</sub>)

-122.76  
-122.84  
-122.91  
-122.99  
-130.65  
-130.69  
-130.80  
-130.84

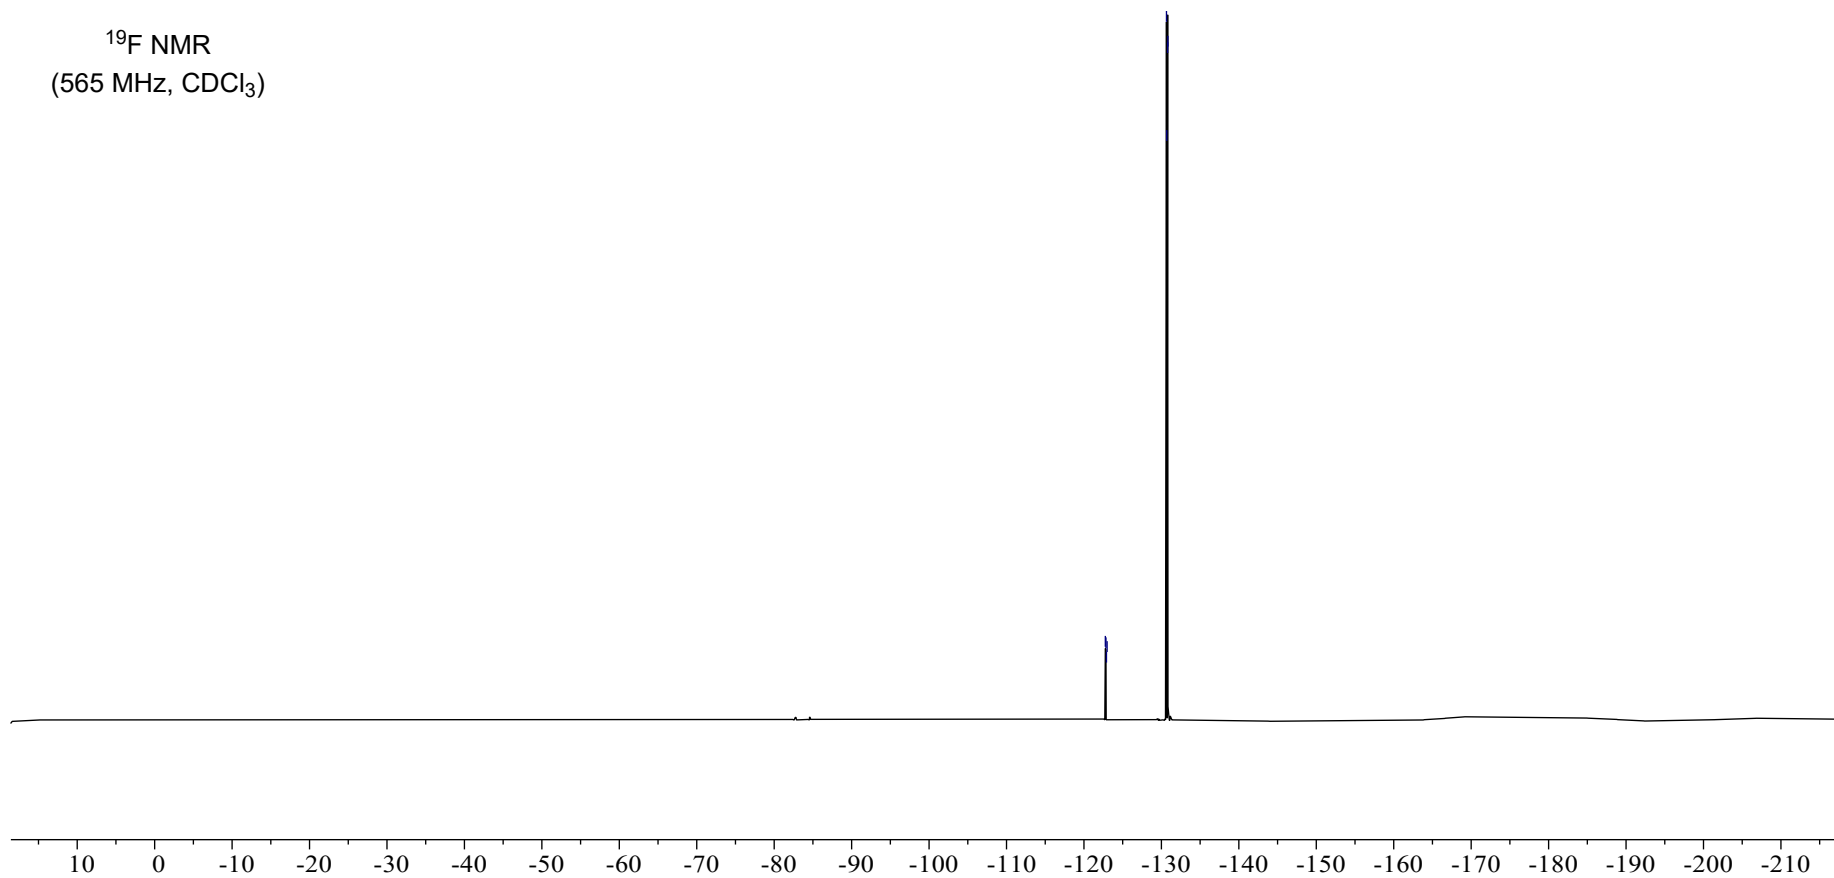

# Mass Spectrum SmartFormula Report

## Analysis Info

Analysis Name D:\LXMS\0106\_RA4\_01\_20505.d  
Method LC\_NO UV\_P50-1500\_6MIN.m  
Sample Name 0106

Acquisition D 2023-01-09 8:54:17

Operator Demo User  
Instrument compact 8255754.2017  
6

## Comment

## Acquisition Paramet

|             |            |               |          |                |           |
|-------------|------------|---------------|----------|----------------|-----------|
| Source Type | ESI        | Ion Polarity  | Positive | Set Nebulizer  | 3.0 Bar   |
| Focus       | Not active | Set Capillary | 4000 V   | Set Dry Heater | 200 °C    |
| Scan Begin  | 50 m/z     | Set End Plate | -500 V   | Set Dry Gas    | 8.0 l/min |

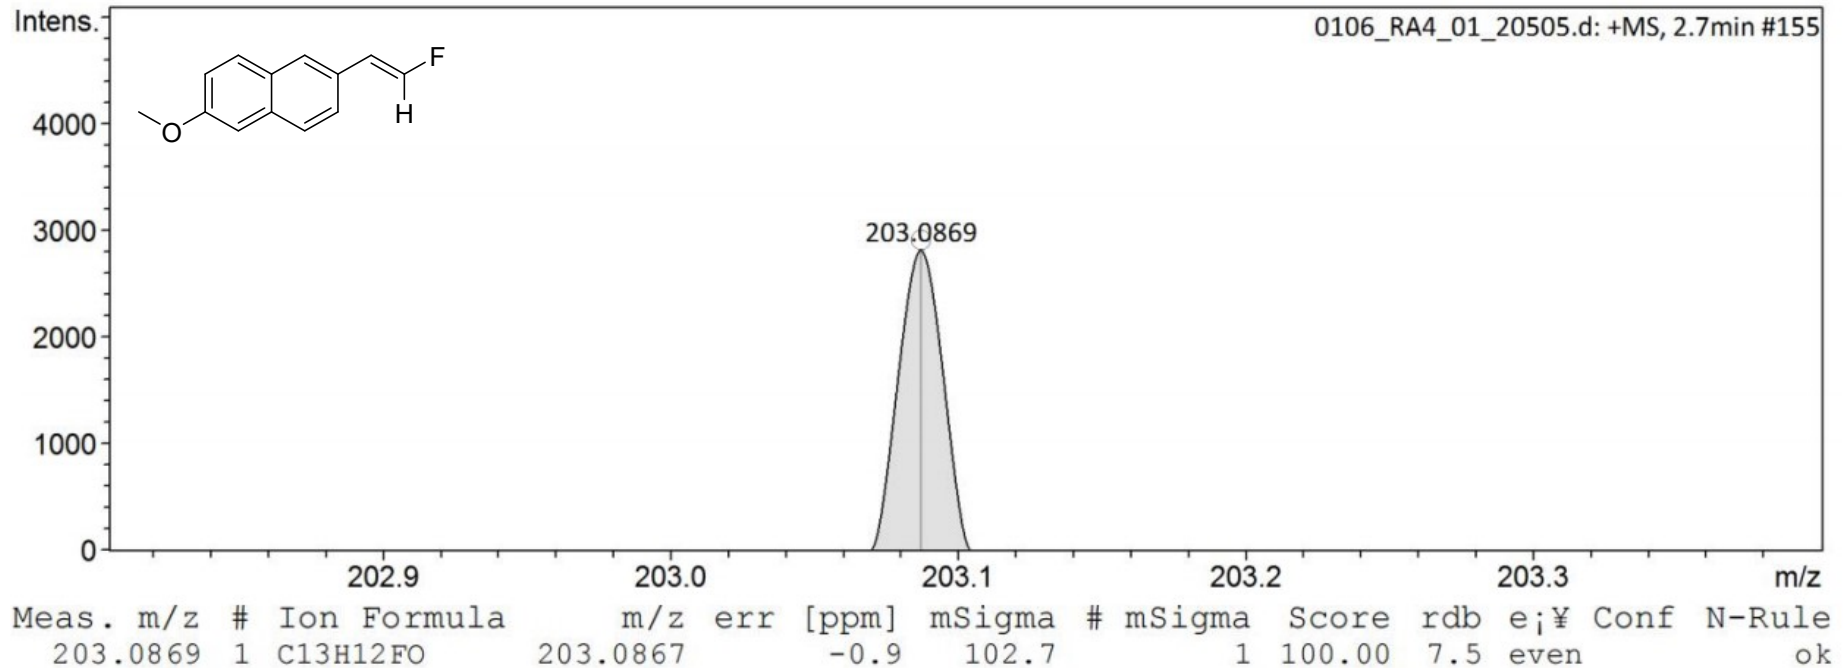

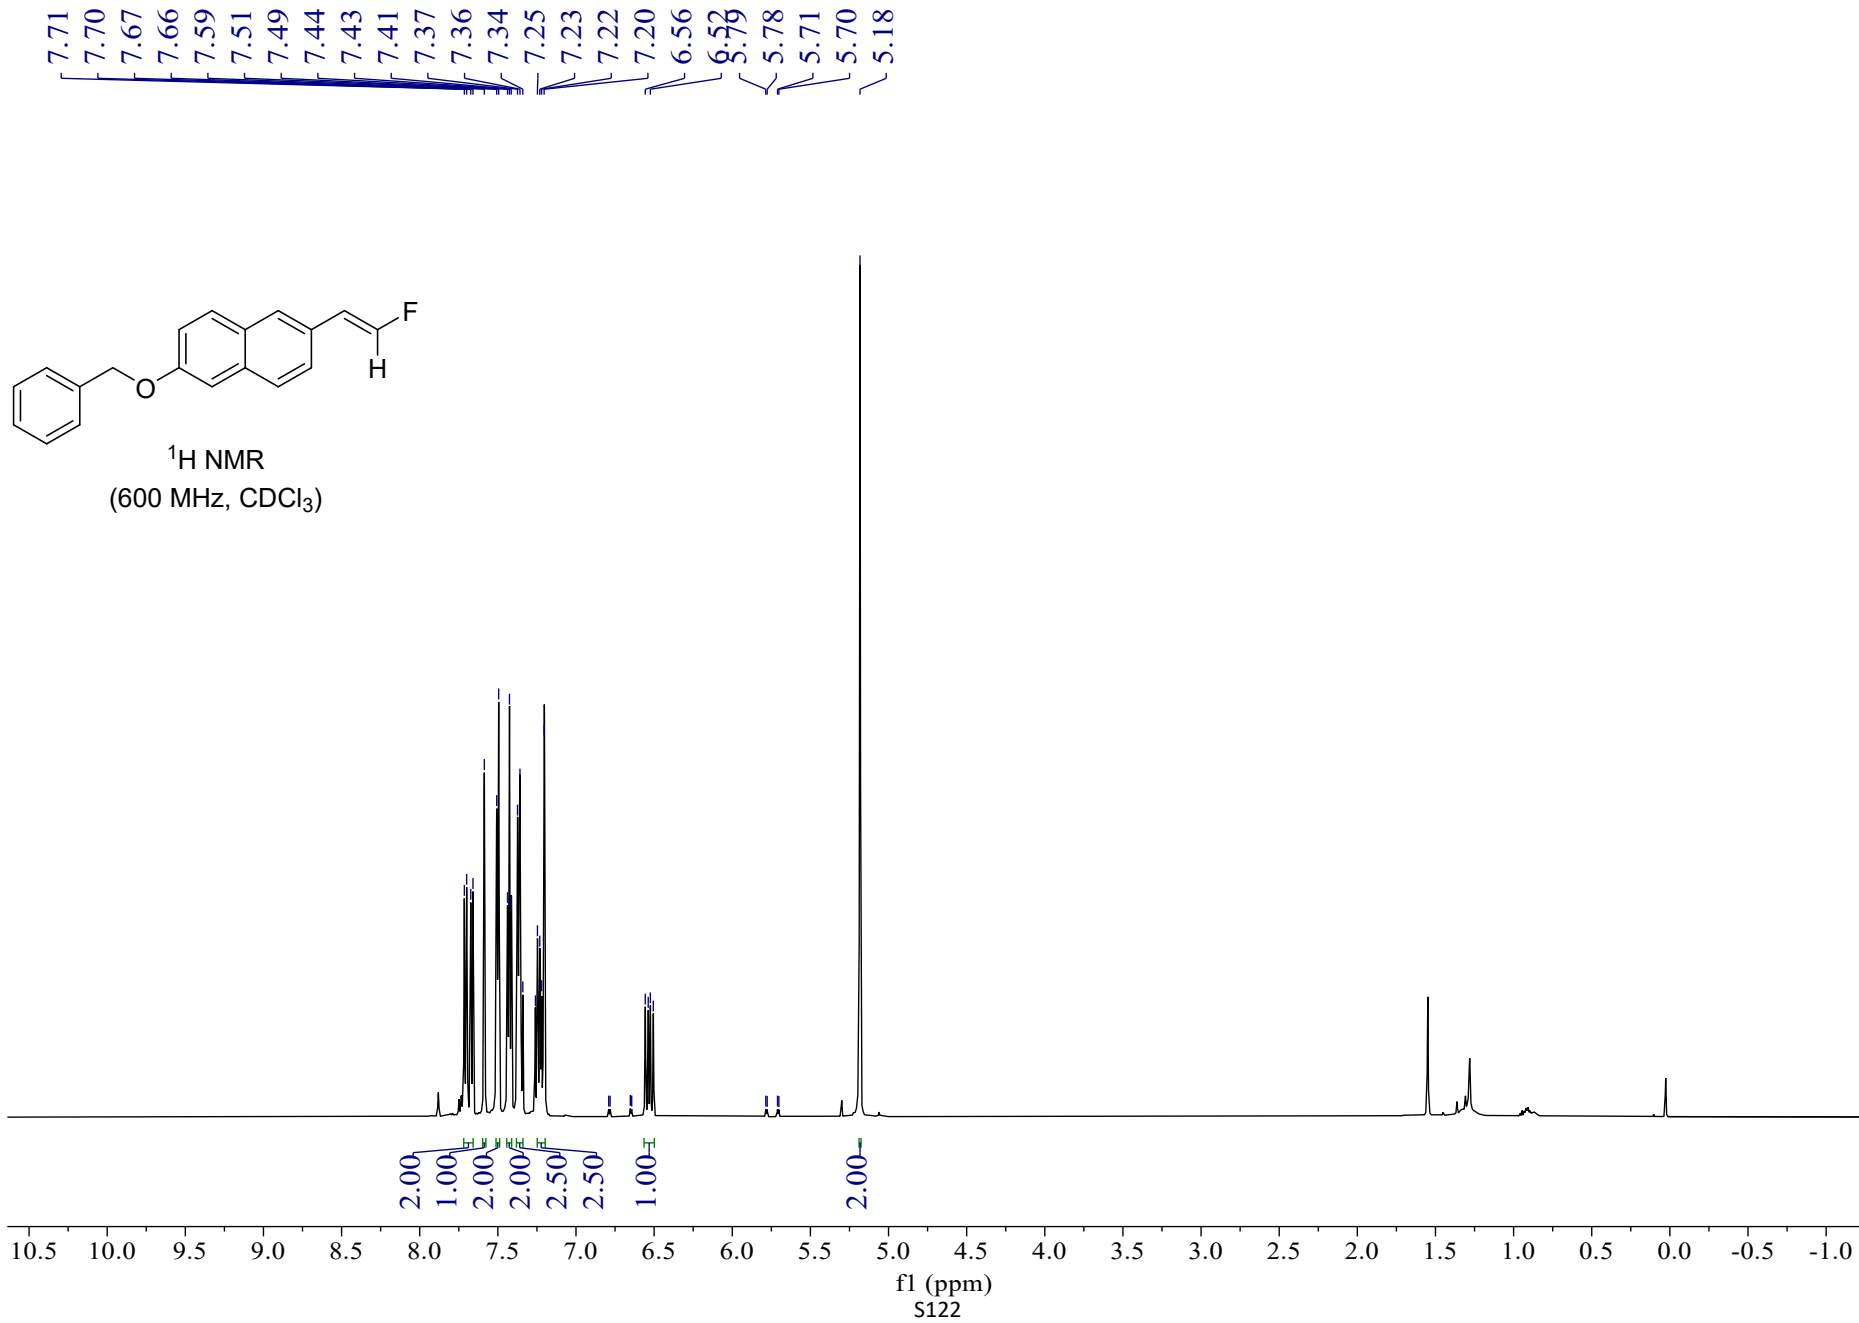

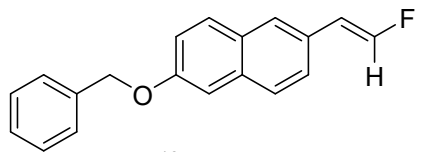

<sup>13</sup>C NMR  
(151 MHz, CDCl<sub>3</sub>)

157.06  
150.96  
149.25  
136.92  
133.99  
129.44  
129.27  
128.79  
128.22  
128.16  
128.08  
127.72  
127.51  
125.72  
125.69  
124.08  
119.69  
114.26  
114.15  
107.38  
77.37  
77.16  
76.95  
70.20

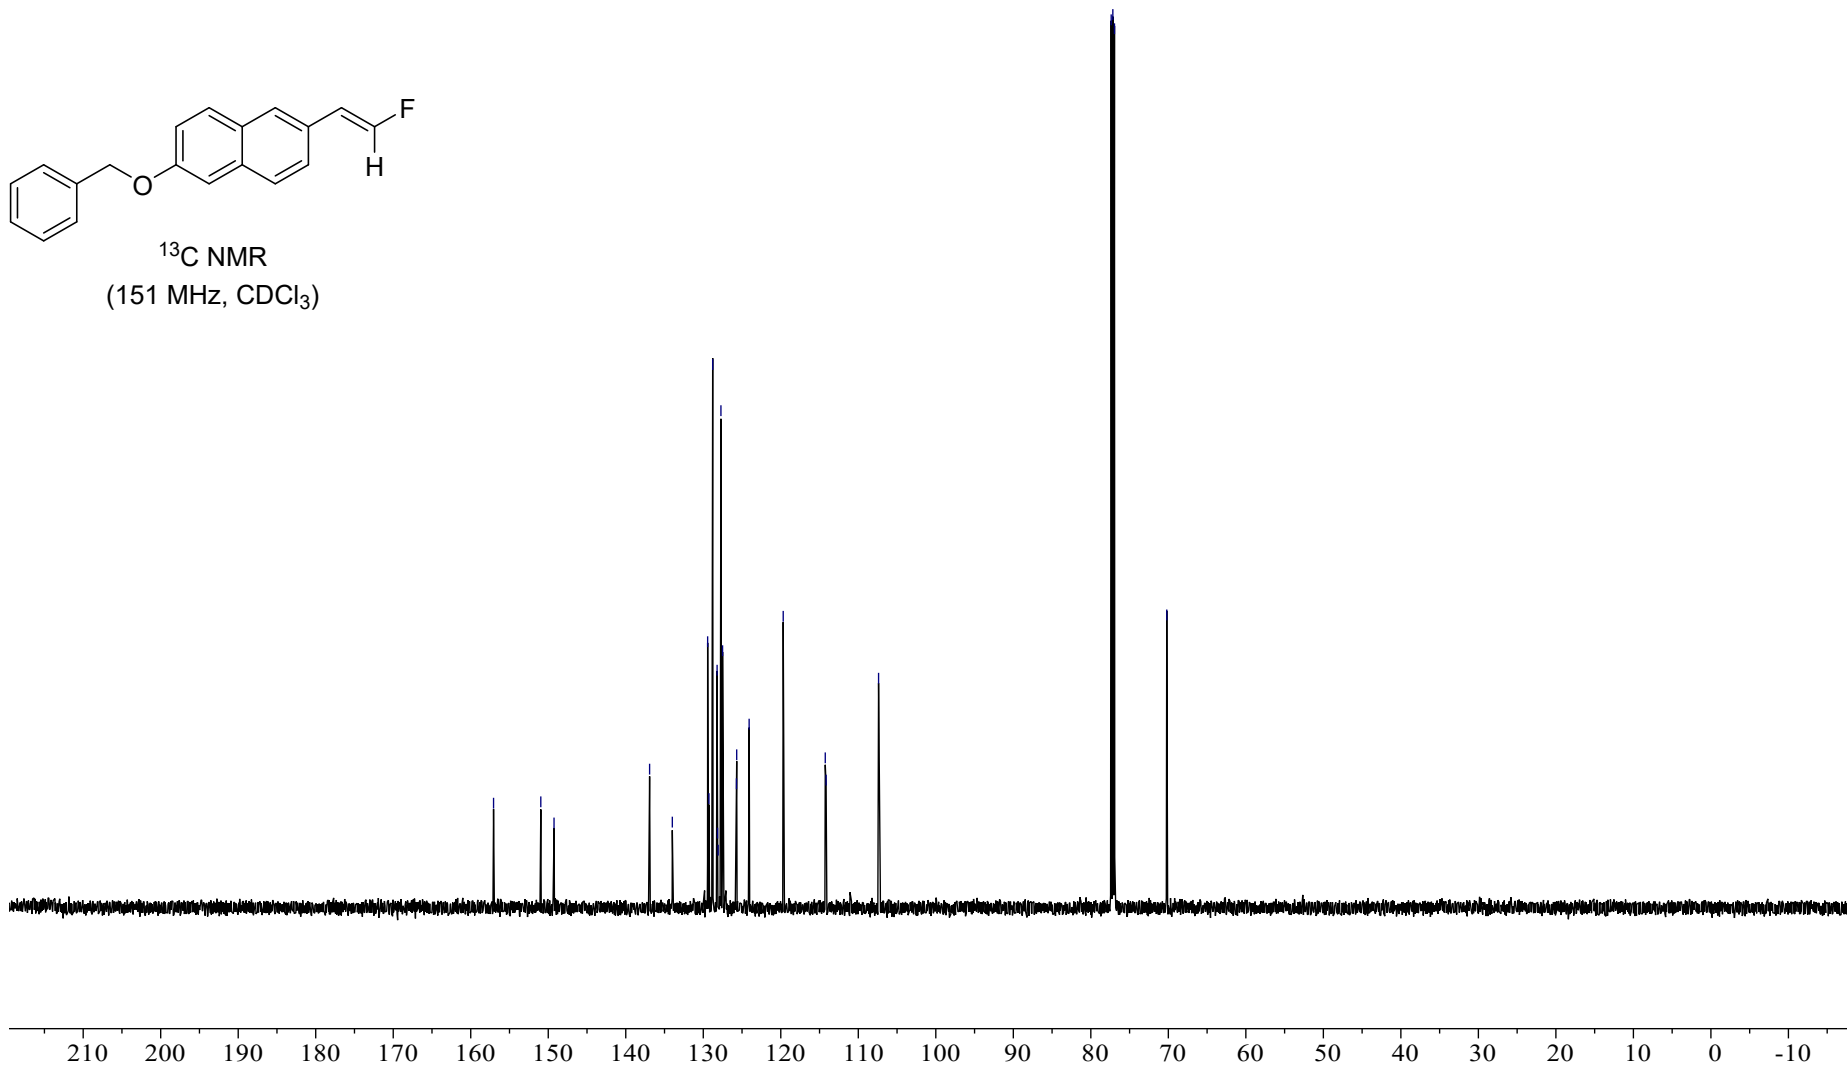

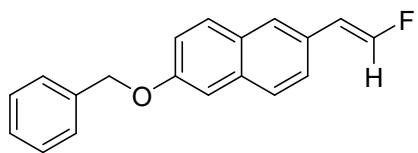

<sup>19</sup>F NMR  
(565 MHz, CDCl<sub>3</sub>)

-122.66  
-122.74  
-122.80  
-122.88  
-130.53  
-130.57  
-130.68  
-130.71

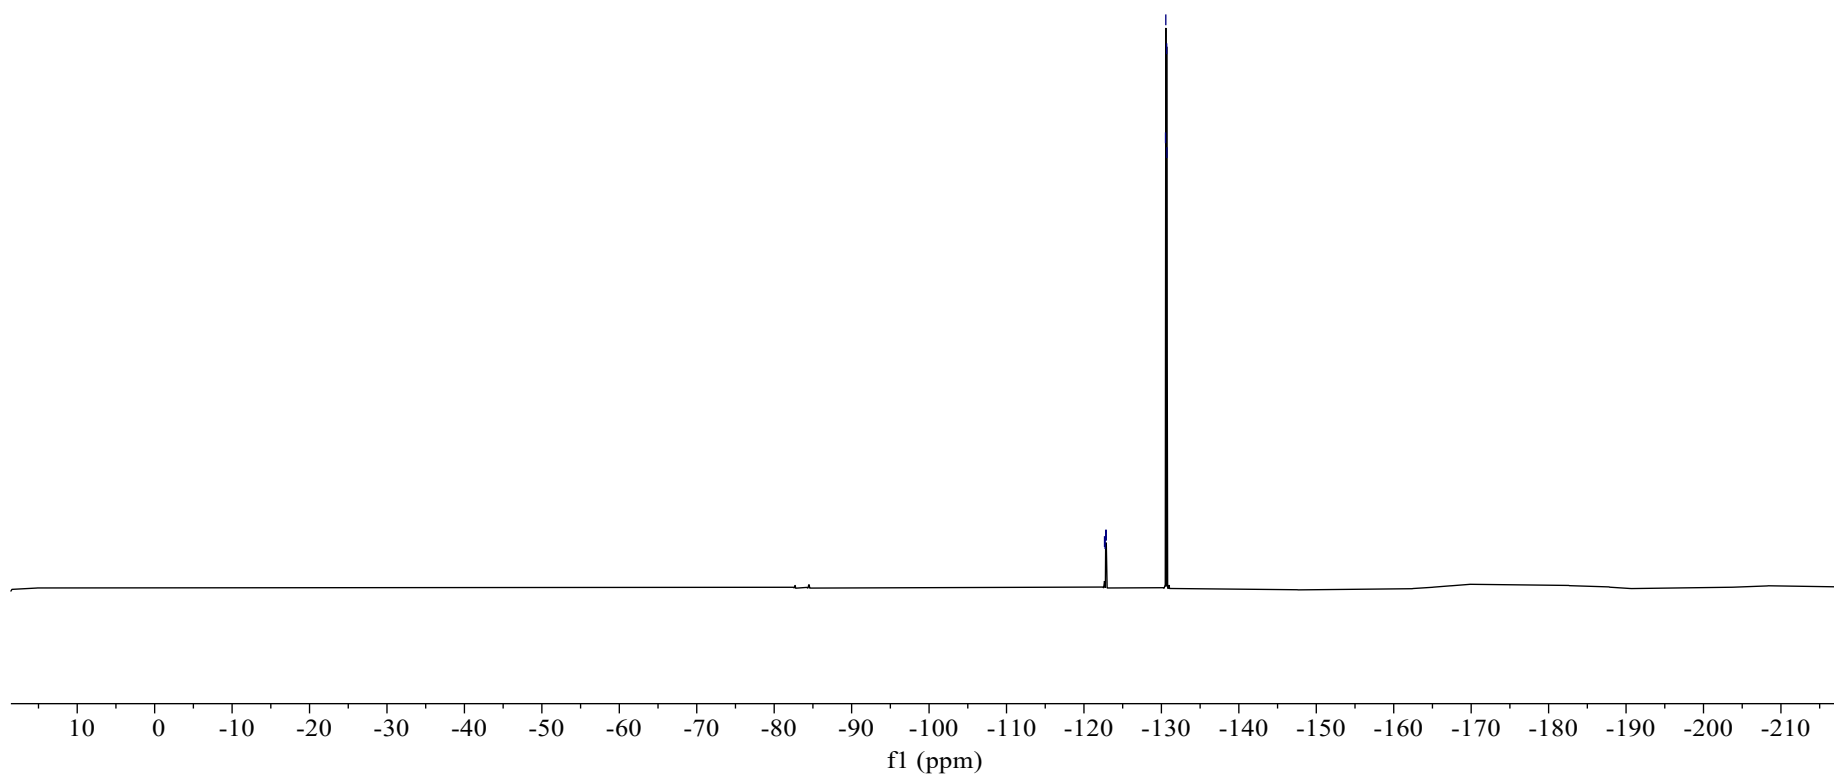



# Mass Spectrum SmartFormula Report

## Analysis Info

Analysis Name D:\LXMS\0306\_BD3\_01\_22075.d  
Method LC\_NO UV\_P50-1500\_10MIN.m  
Sample Name 0306

Acquisition D 2023-03-10 17:57:12

Operator Demo User  
Instrument compact 8255754.2017  
6

## Comment

## Acquisition Paramet

|             |            |               |          |                |           |
|-------------|------------|---------------|----------|----------------|-----------|
| Source Type | ESI        | Ion Polarity  | Positive | Set Nebulizer  | 3.0 Bar   |
| Focus       | Not active | Set Capillary | 4000 V   | Set Dry Heater | 200 °C    |
| Scan Begin  | 50 m/z     | Set End Plate | -500 V   | Set Dry Gas    | 8.0 l/min |

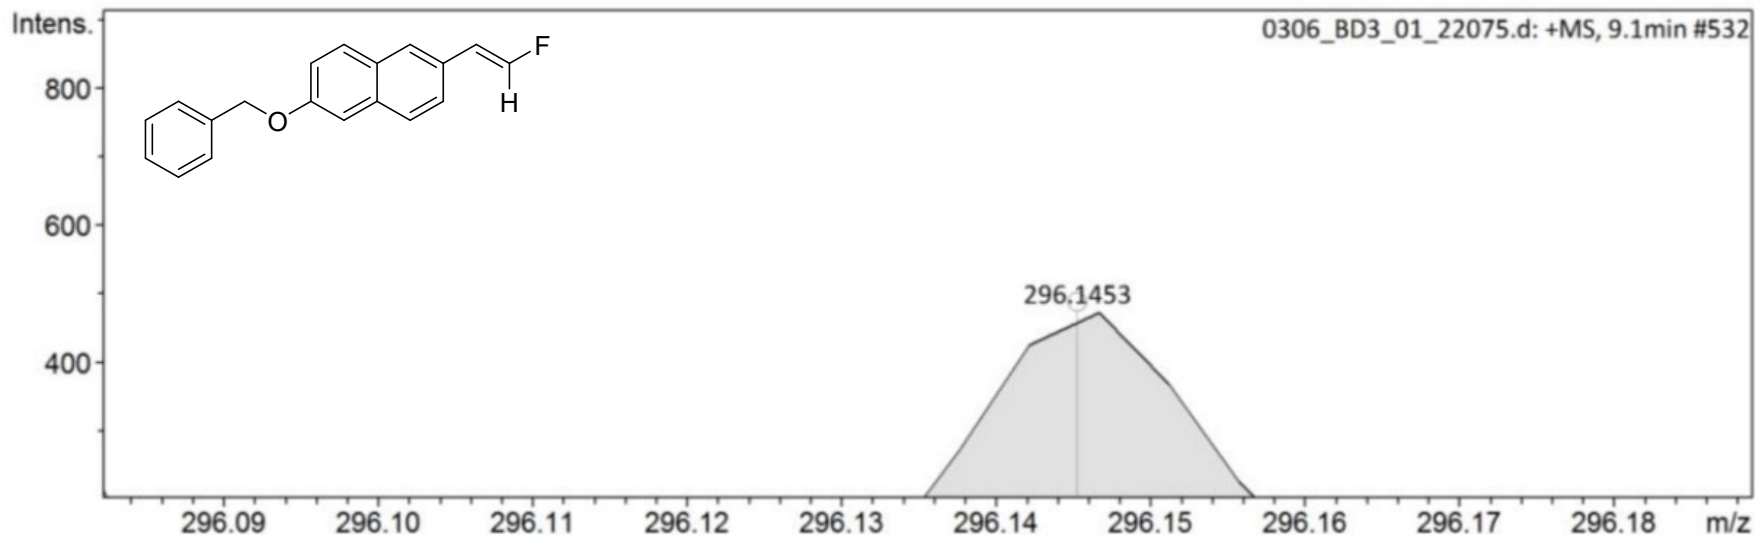

| Meas. m/z | # | Ion Formula | m/z      | err [ppm] | mSigma | # | mSigma | Score | rdb  | e;¥ | Conf | N-Rule |
|-----------|---|-------------|----------|-----------|--------|---|--------|-------|------|-----|------|--------|
| 296.1453  | 1 | C19H19FNO   | 296.1445 | -2.5      | n.a.   | 1 | 100.00 | 10.5  | even |     |      | ok     |

7.70  
7.68  
7.66  
7.65  
7.57  
7.37  
7.35  
7.34  
7.26  
7.22  
7.20  
7.19  
7.19  
7.18  
7.17  
7.12  
6.78  
6.78  
6.65  
6.64  
6.55  
6.53  
6.52  
6.50  
6.16  
6.15  
6.15  
6.14  
6.13  
6.12  
6.11  
6.10  
5.78  
5.77  
5.70  
5.69  
5.50  
5.47  
5.35  
5.33  
4.66  
4.65

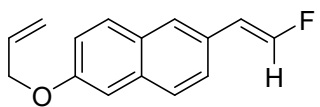

<sup>1</sup>H NMR  
(600 MHz, CDCl<sub>3</sub>)

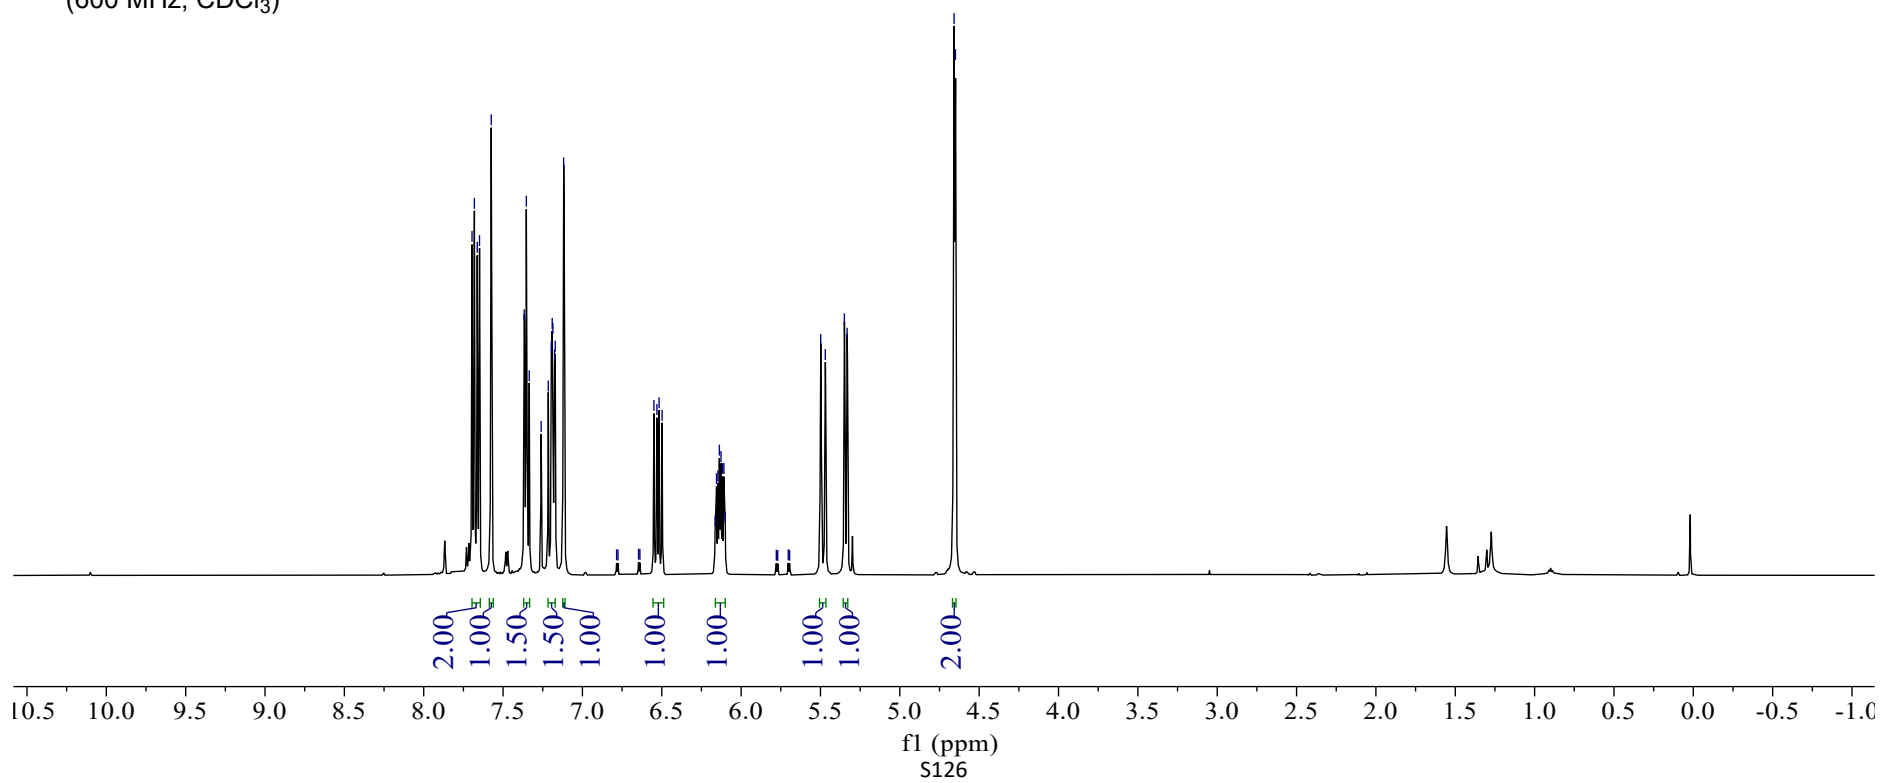

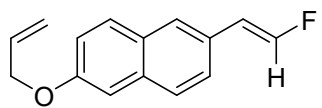

$^{13}\text{C}$  NMR  
(151 MHz,  $\text{CDCl}_3$ )

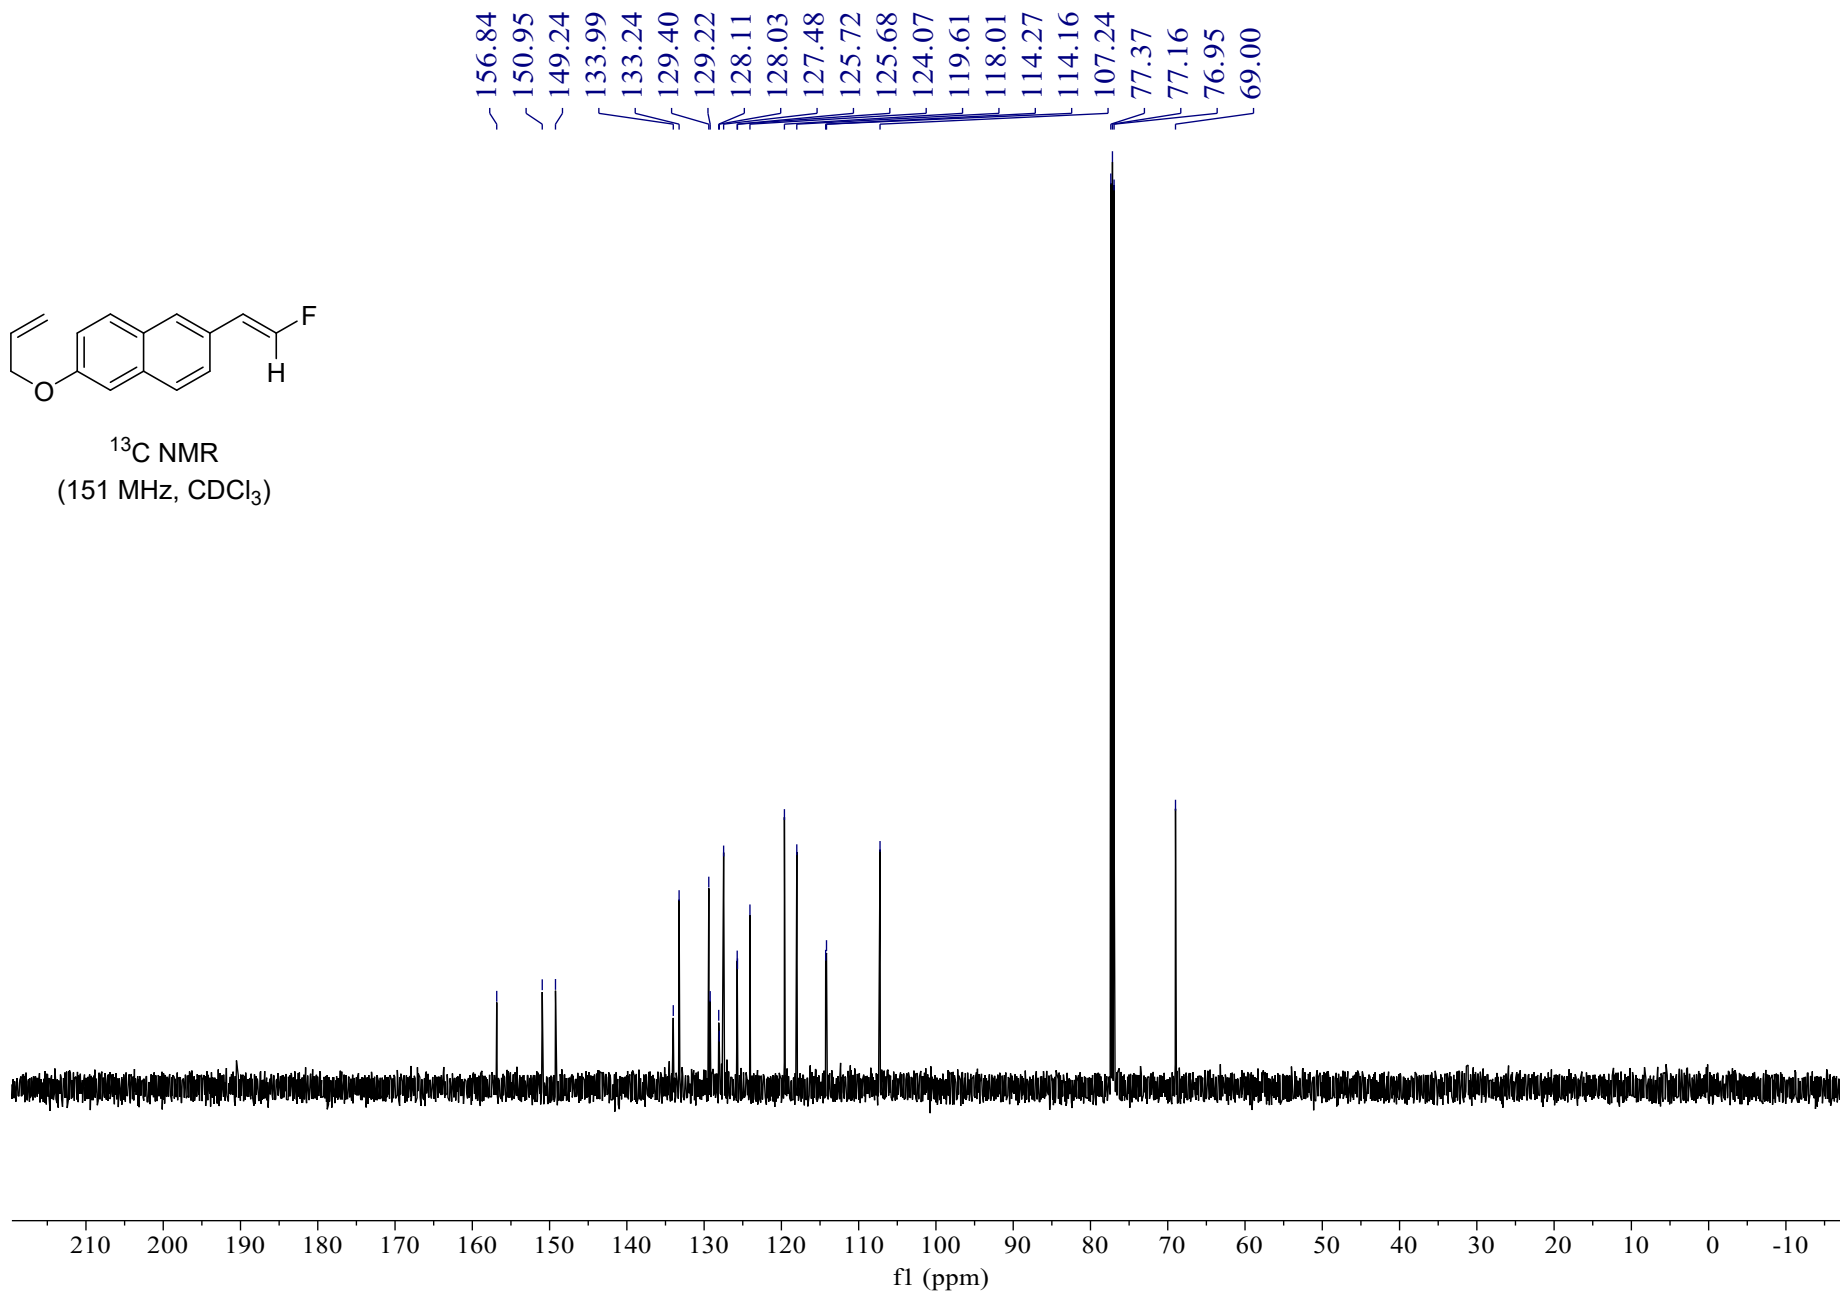

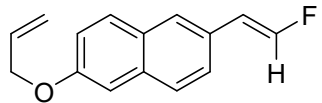

<sup>19</sup>F NMR  
(565 MHz, CDCl<sub>3</sub>)

-122.72  
-122.80  
-122.87  
-122.95  
-130.61  
-130.64  
-130.76  
-130.79

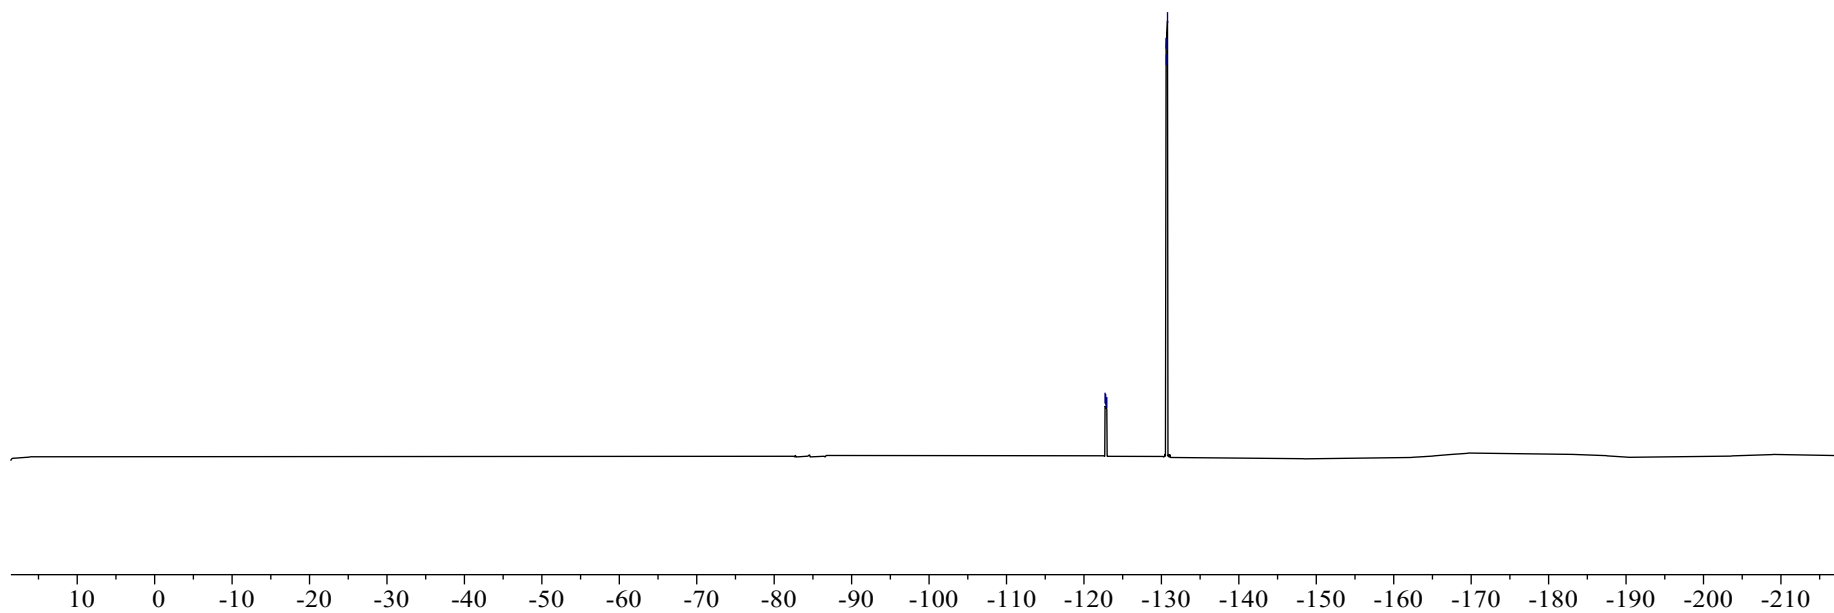

# Mass Spectrum SmartFormula Report

## Analysis Info

Analysis Name D:\LXMS\0106\_RC1\_01\_20518.d

Method LC\_NO UV\_P50-1500\_6MIN.m

Sample Name 0106

Acquisition D 2023-01-09 10:32:19

Operator Demo User

Instrument compact 8255754.2017  
6

## Comment

## Acquisition Paramet

|             |            |               |          |                |           |
|-------------|------------|---------------|----------|----------------|-----------|
| Source Type | ESI        | Ion Polarity  | Positive | Set Nebulizer  | 3.0 Bar   |
| Focus       | Not active | Set Capillary | 4000 V   | Set Dry Heater | 200 °C    |
| Scan Begin  | 50 m/z     | Set End Plate | -500 V   | Set Dry Gas    | 8.0 l/min |

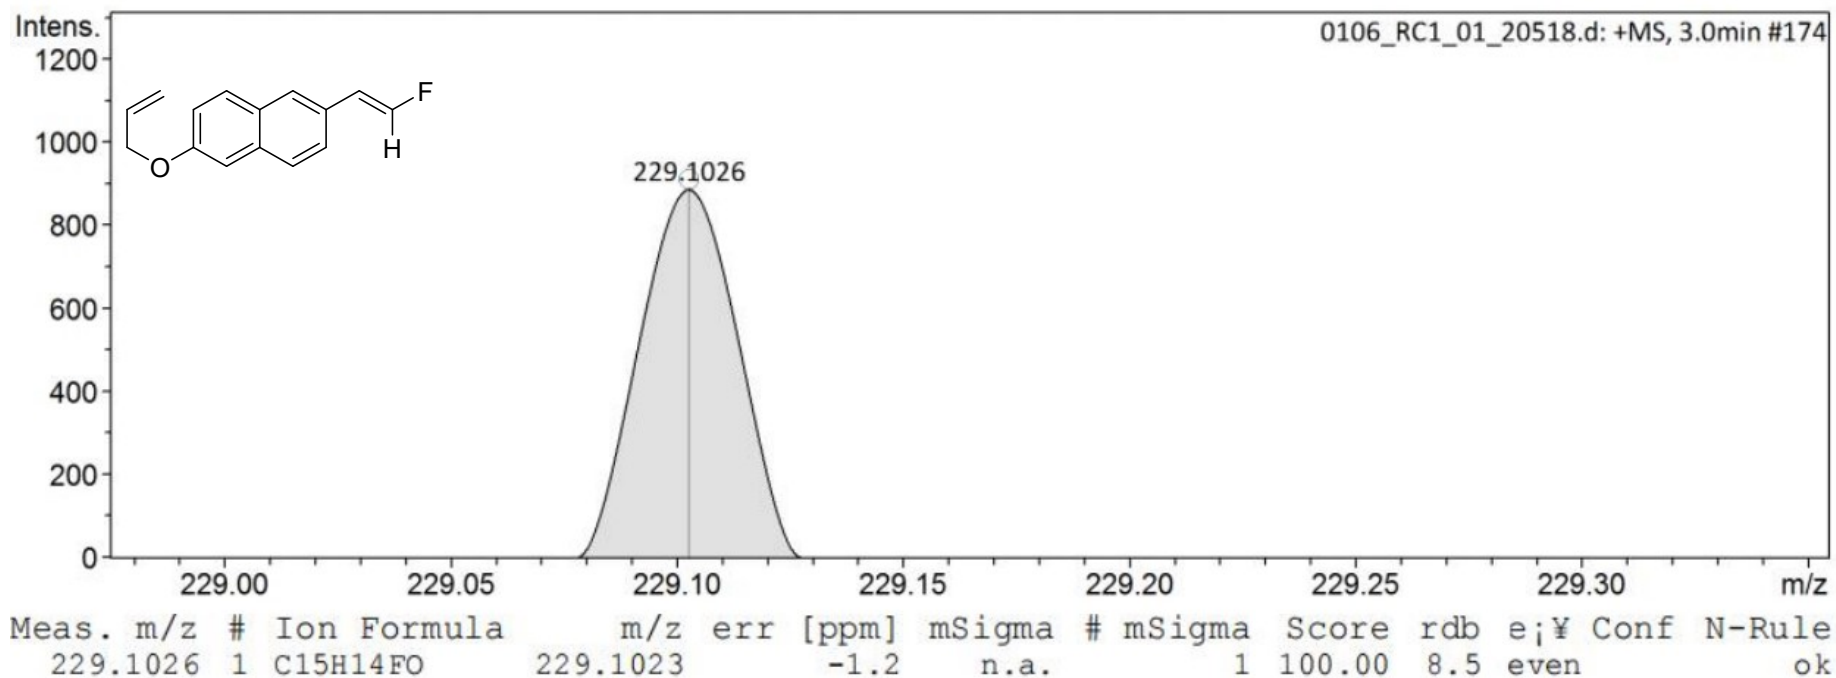

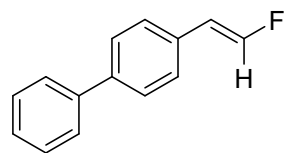

$^1\text{H NMR}$   
(600 MHz,  $\text{CDCl}_3$ )

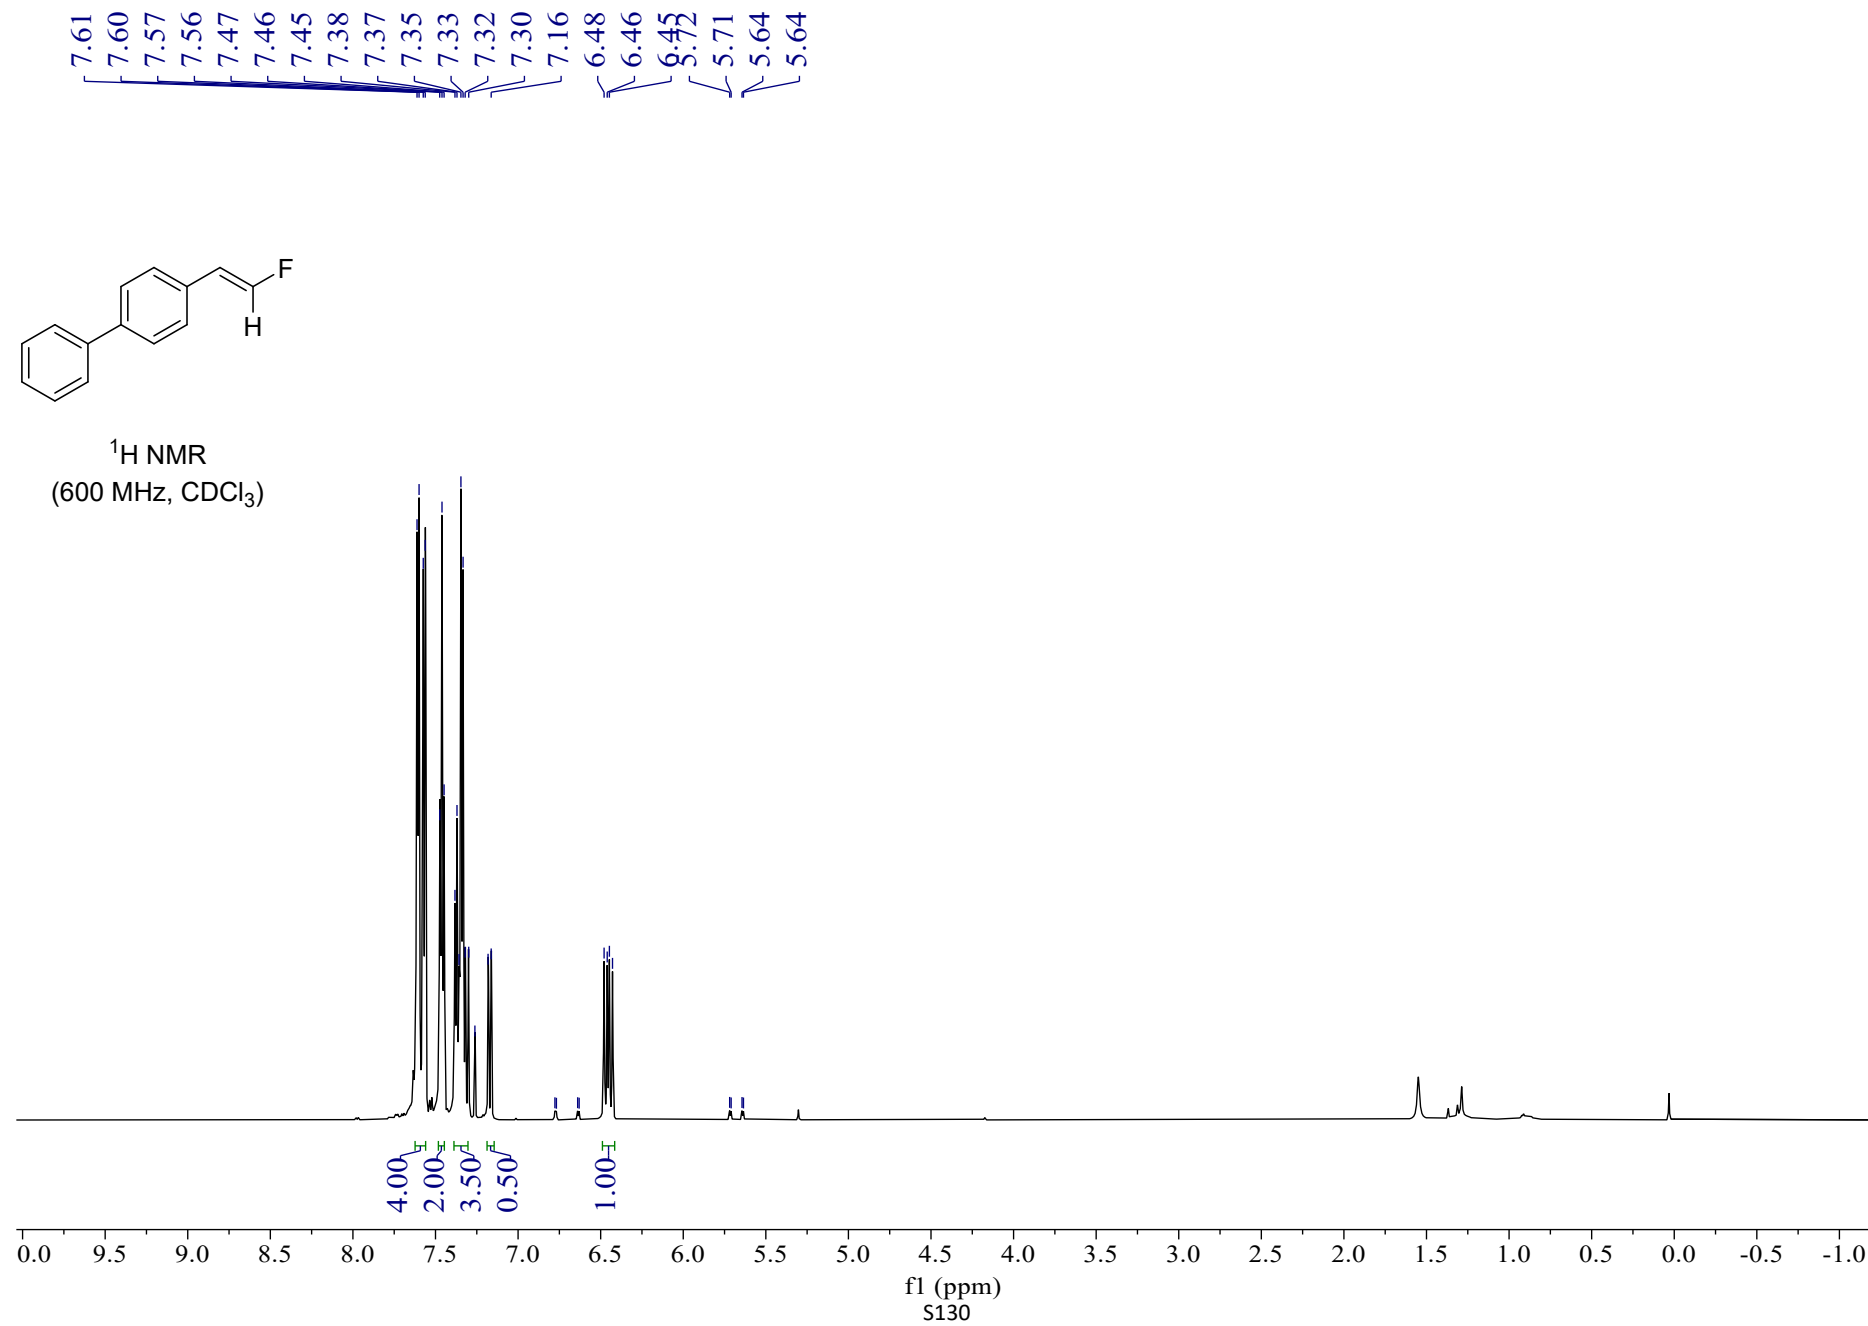

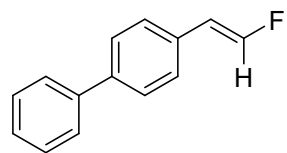

<sup>13</sup>C NMR  
(151 MHz, CDCl<sub>3</sub>)

151.20  
149.48  
140.66  
140.48  
140.47  
131.84  
131.76  
128.96  
127.59  
127.54  
127.04  
126.69  
126.67  
113.72  
113.61  
  
77.37  
77.16  
76.95

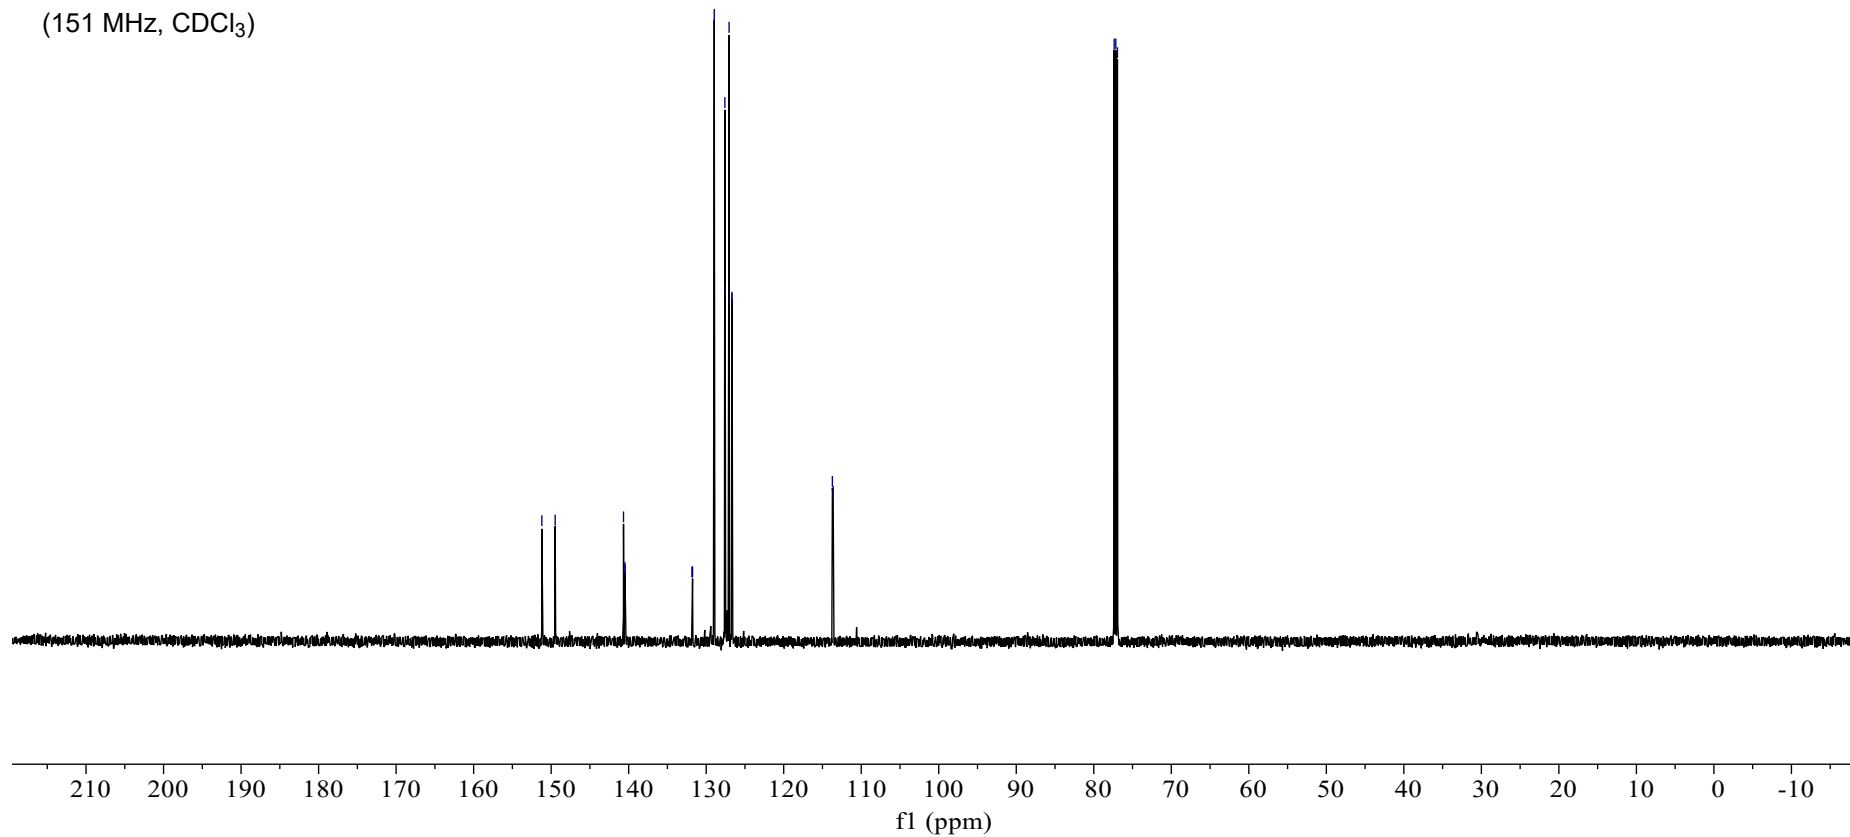

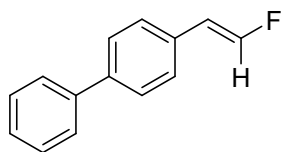

<sup>19</sup>F NMR  
(376 MHz, CDCl<sub>3</sub>)

-121.51  
-121.63  
-121.73  
-121.85  
-129.33  
-129.33  
-129.38  
-129.55  
-129.60

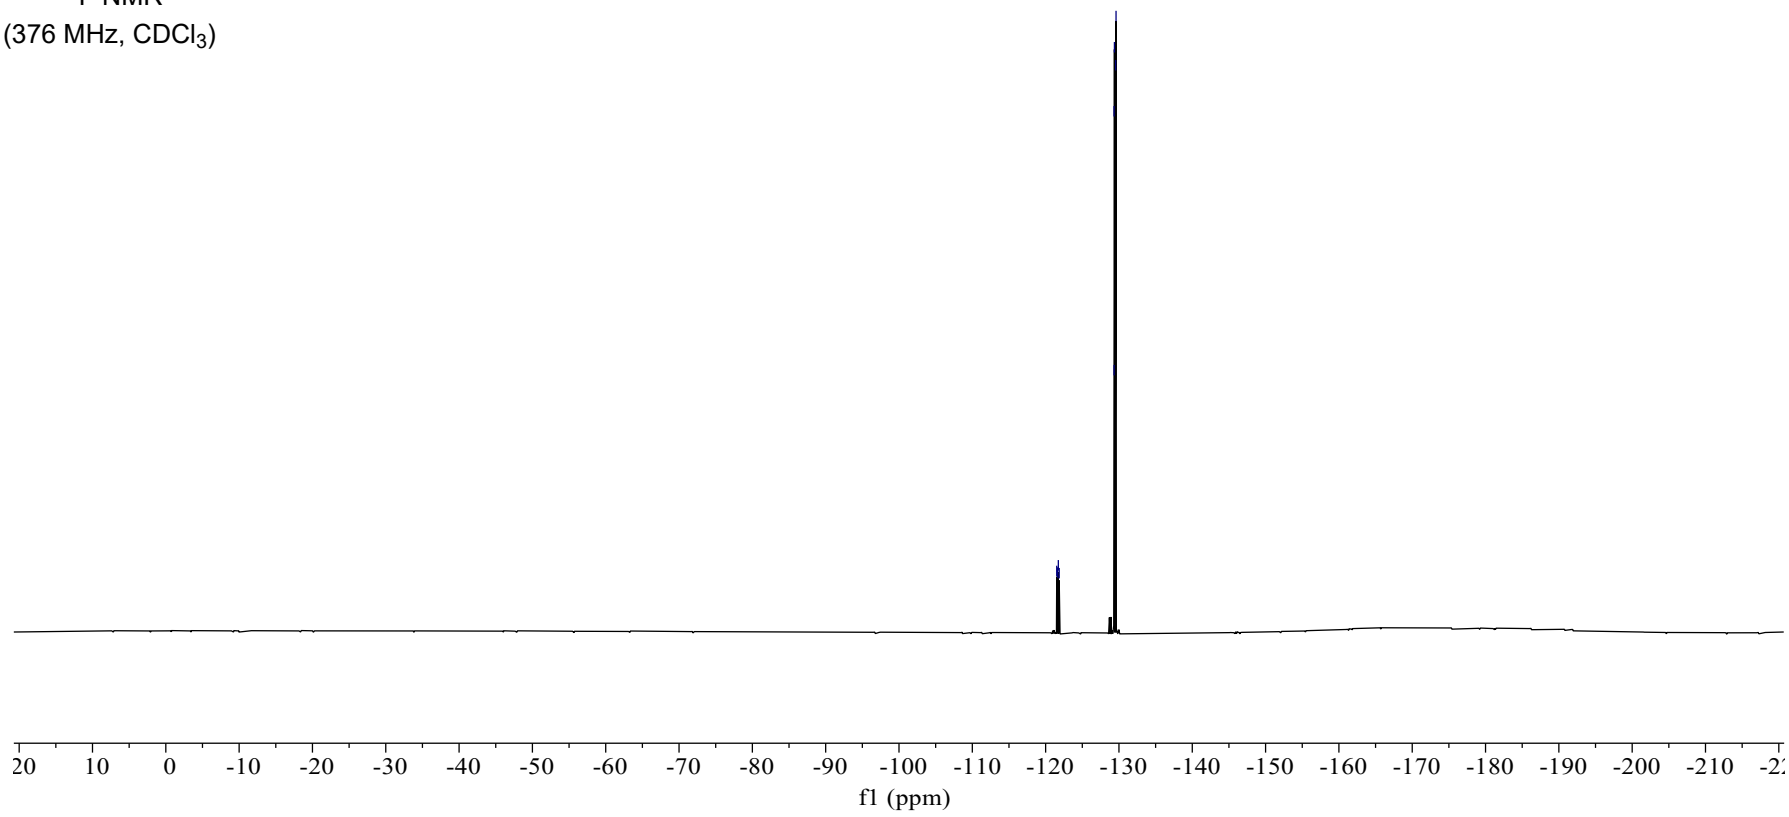



# Mass Spectrum SmartFormula Report

## Analysis Info

Analysis Name D:\LXMS\0106\_RA5\_01\_20506.d  
Method LC\_NO UV\_P50-1500\_6MIN.m  
Sample Name 0106

Acquisition D 2023-01-09 9:01:53

Operator Demo User

Instrument compact 8255754.2017  
6

## Comment

## Acquisition Paramet

|             |            |               |          |                |           |
|-------------|------------|---------------|----------|----------------|-----------|
| Source Type | ESI        | Ion Polarity  | Positive | Set Nebulizer  | 3.0 Bar   |
| Focus       | Not active | Set Capillary | 4000 V   | Set Dry Heater | 200 °C    |
| Scan Begin  | 50 m/z     | Set End Plate | -500 V   | Set Dry Gas    | 8.0 l/min |

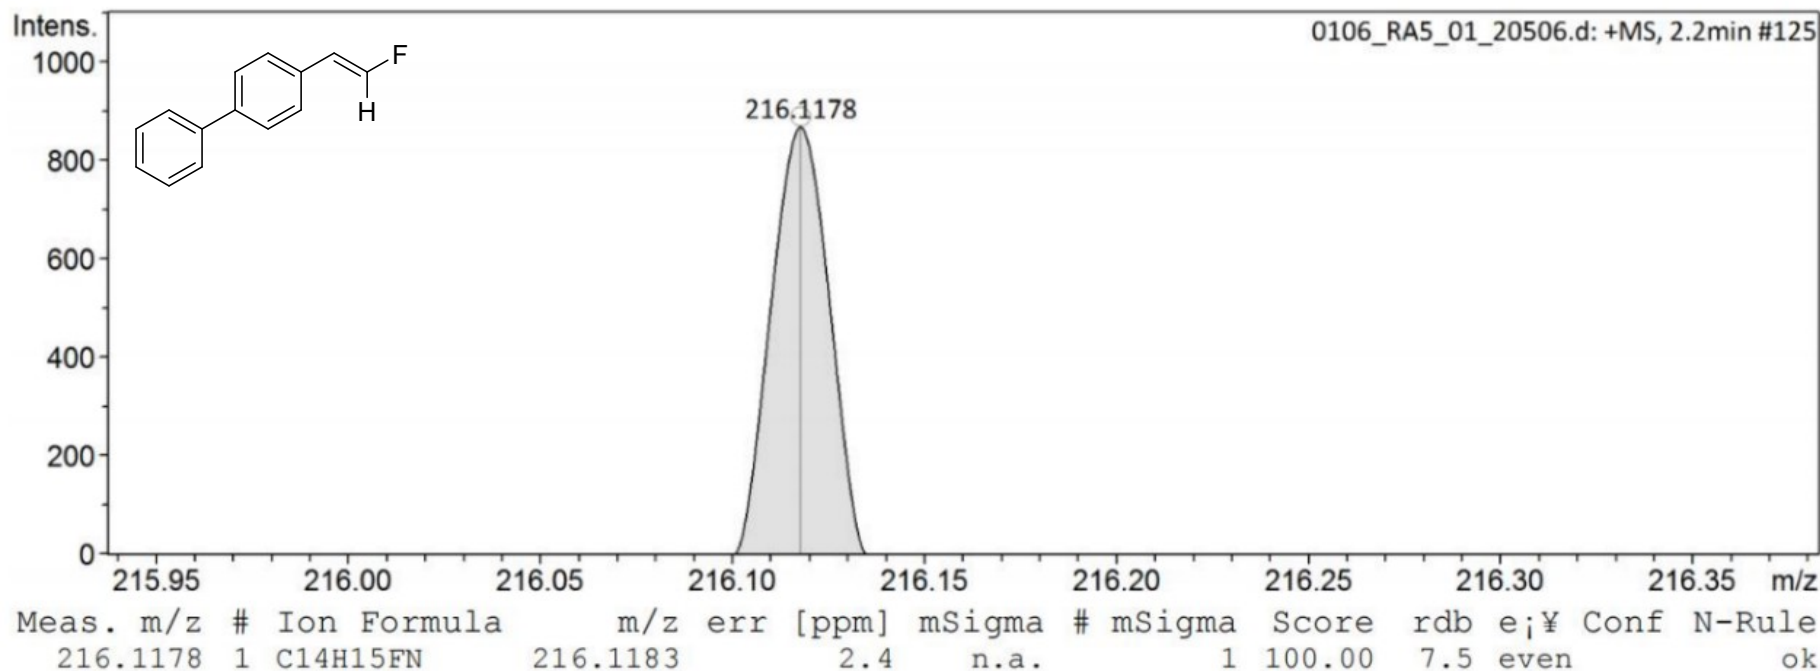

7.37  
7.36  
7.35  
7.26  
7.23  
7.22  
7.20  
7.15  
7.14  
7.12  
7.08  
7.06  
7.04  
7.03  
6.98  
6.97  
6.72  
6.71  
6.58  
6.57  
5.65  
5.64  
5.57  
5.56

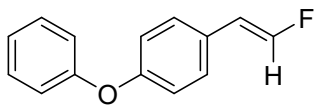

<sup>1</sup>H NMR  
(600 MHz, CDCl<sub>3</sub>)

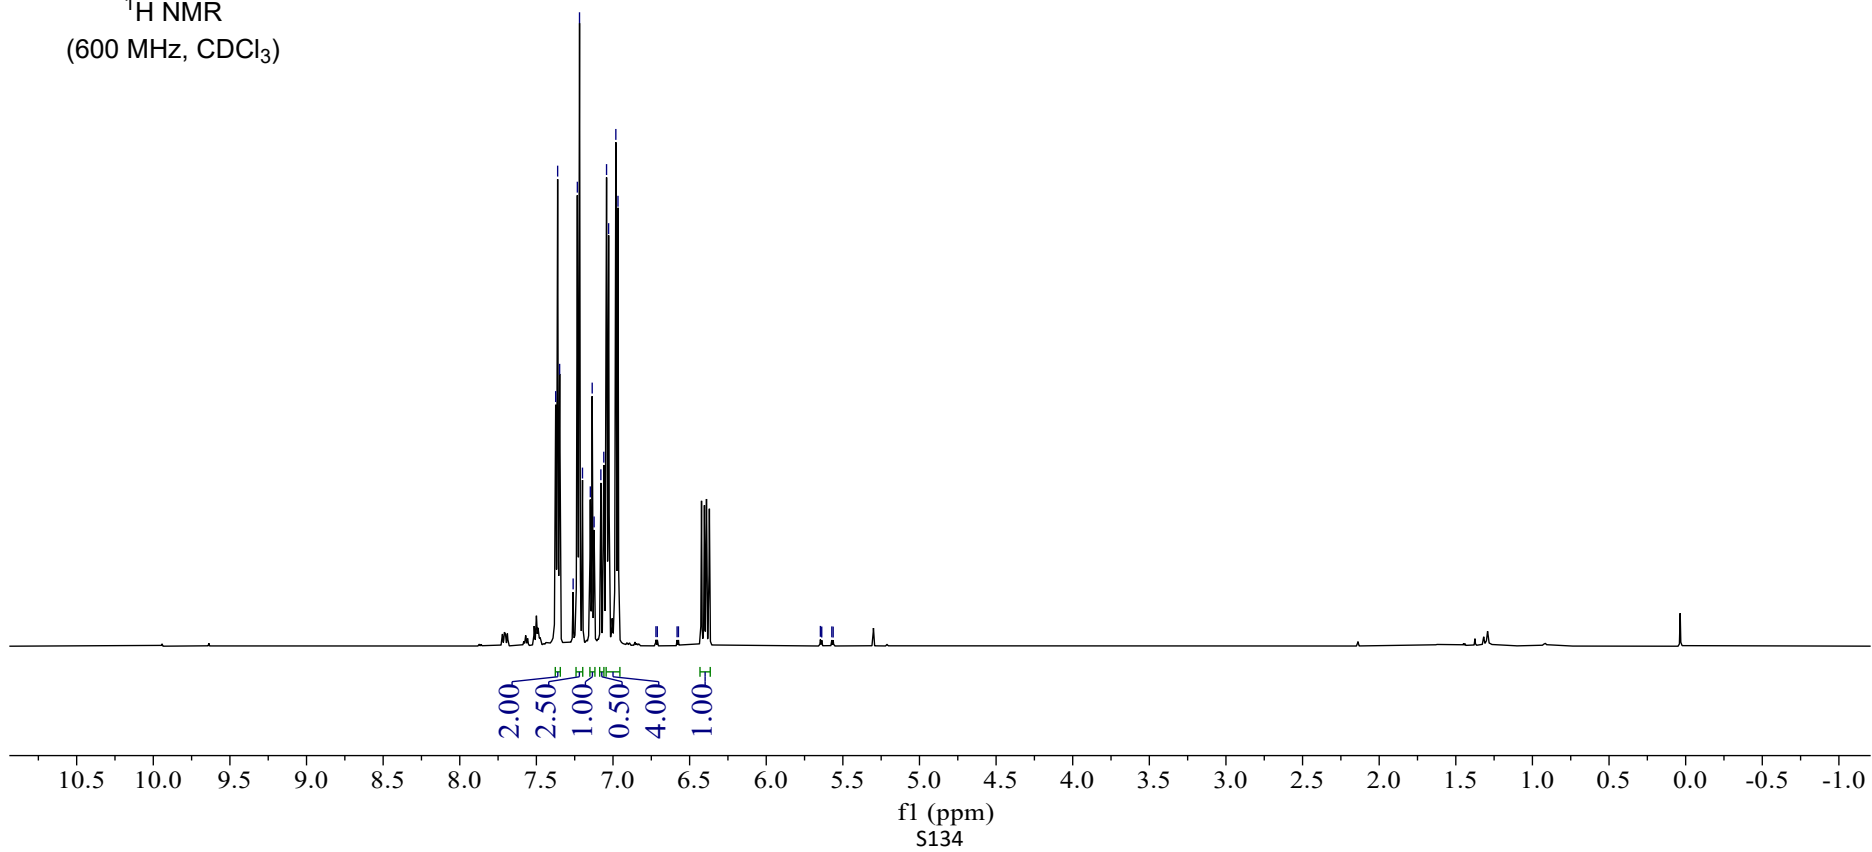

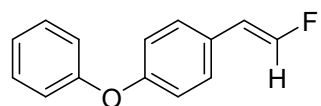

$^{13}\text{C}$  NMR  
(101 MHz,  $\text{CDCl}_3$ )

157.15  
156.91  
156.89  
151.04  
148.47  
129.93  
127.82  
127.70  
127.66  
127.63  
123.58  
119.25  
119.08  
113.39  
113.23

77.48  
77.16  
76.84

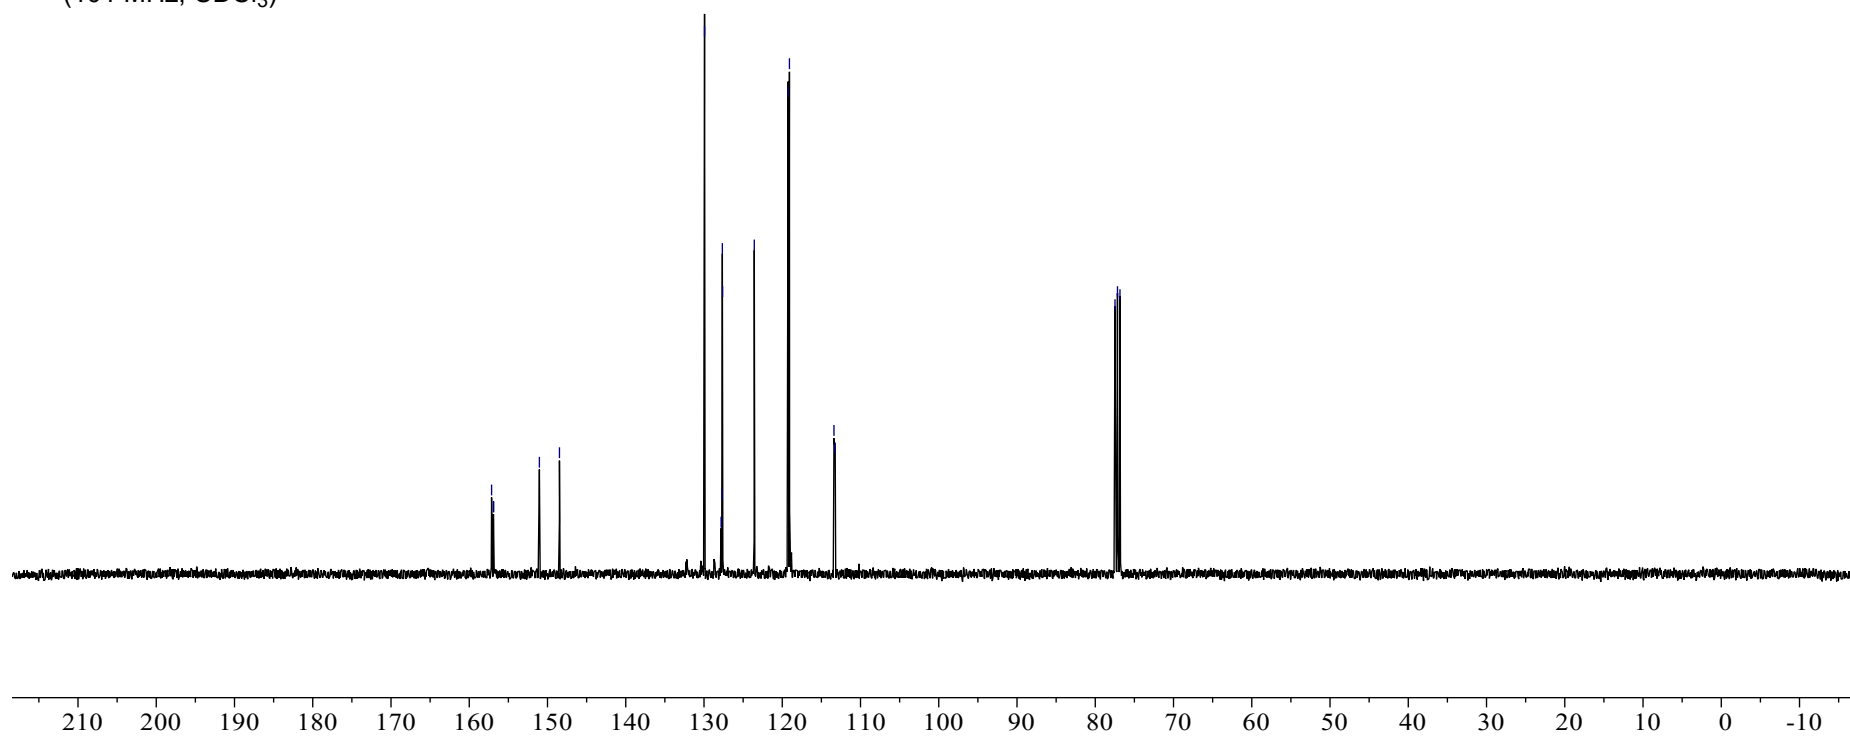

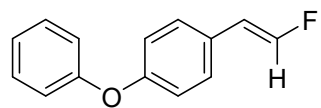

$^{19}\text{F}$  NMR  
(565 MHz,  $\text{CDCl}_3$ )

-123.75  
-123.83  
-123.90  
-123.98  
-130.77  
-130.81  
-130.92  
-130.96

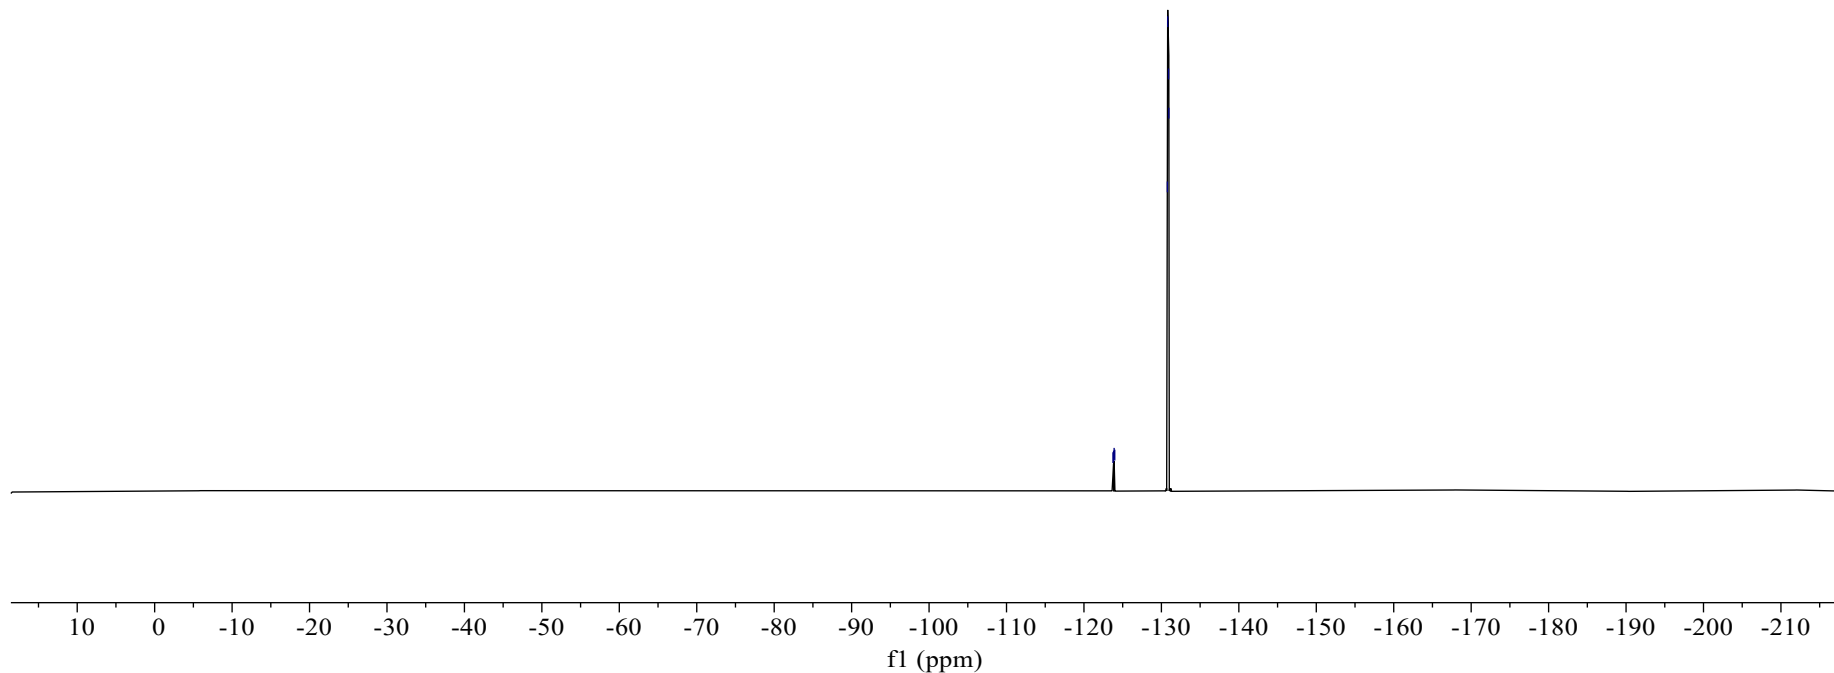

S136

# Mass Spectrum SmartFormula Report

## Analysis Info

Analysis Name D:\LXMS\0106\_RB4\_01\_20513.d  
Method LC\_NO UV\_P50-1500\_6MIN.m  
Sample Name 0106

Acquisition D 2023-01-09 9:54:58

Operator Demo User

Instrument compact 8255754.2017  
6

## Comment

## Acquisition Paramet

|             |            |               |          |                |           |
|-------------|------------|---------------|----------|----------------|-----------|
| Source Type | ESI        | Ion Polarity  | Positive | Set Nebulizer  | 3.0 Bar   |
| Focus       | Not active | Set Capillary | 4000 V   | Set Dry Heater | 200 °C    |
| Scan Begin  | 50 m/z     | Set End Plate | -500 V   | Set Dry Gas    | 8.0 l/min |

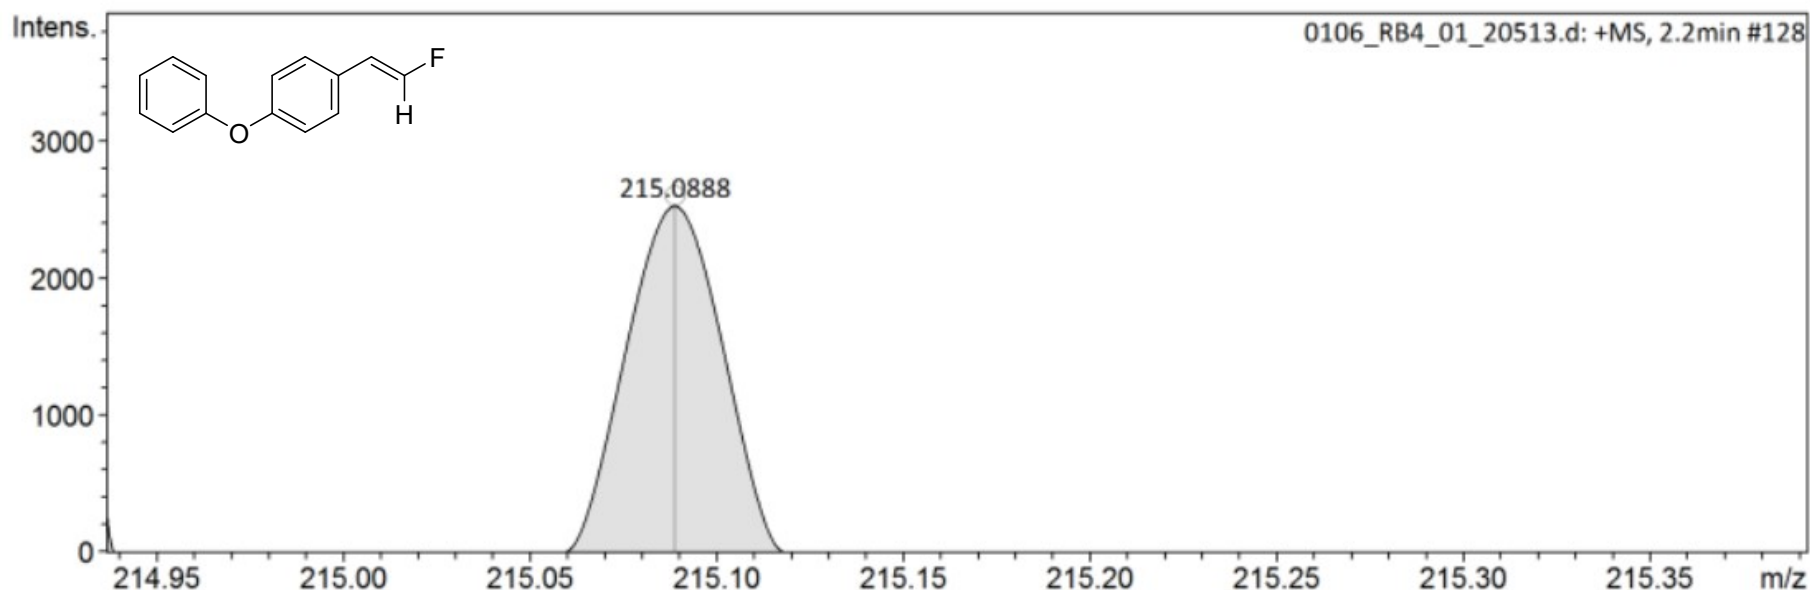

| Meas. m/z | # | Ion Formula | m/z      | err [ppm] | mSigma | # | mSigma | Score | rdb  | e;Y | Conf | N-Rule |
|-----------|---|-------------|----------|-----------|--------|---|--------|-------|------|-----|------|--------|
| 215.0888  | 1 | C14H12FO    | 215.0867 | -9.9      | n.a.   | 1 | 100.00 | 8.5   | even |     |      | ok     |

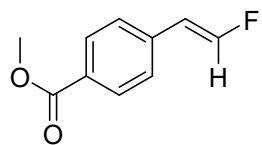

<sup>1</sup>H NMR  
(400 MHz, CDCl<sub>3</sub>)

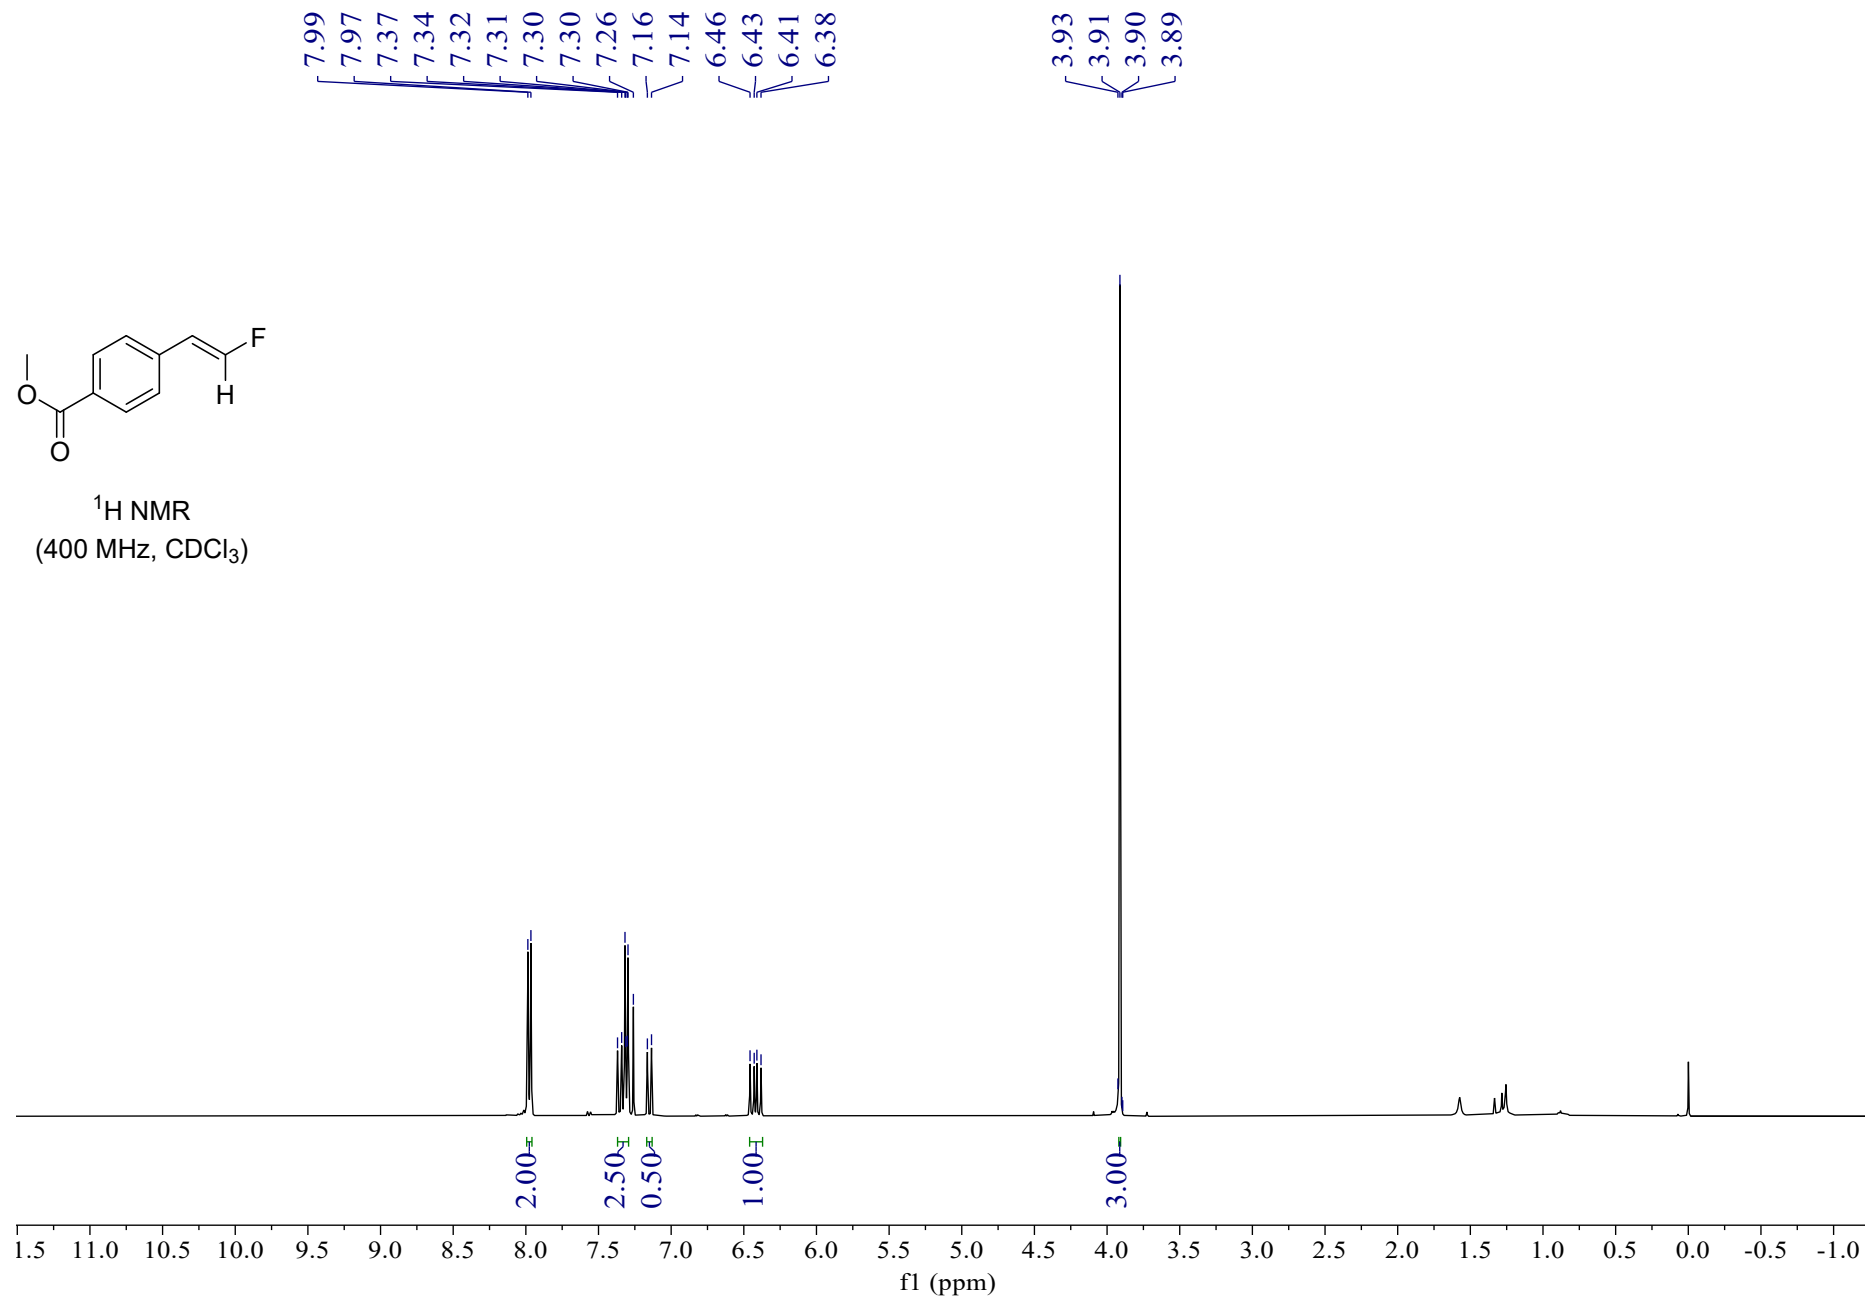

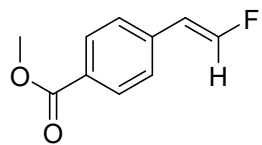

<sup>13</sup>C NMR  
(151 MHz, CDCl<sub>3</sub>)

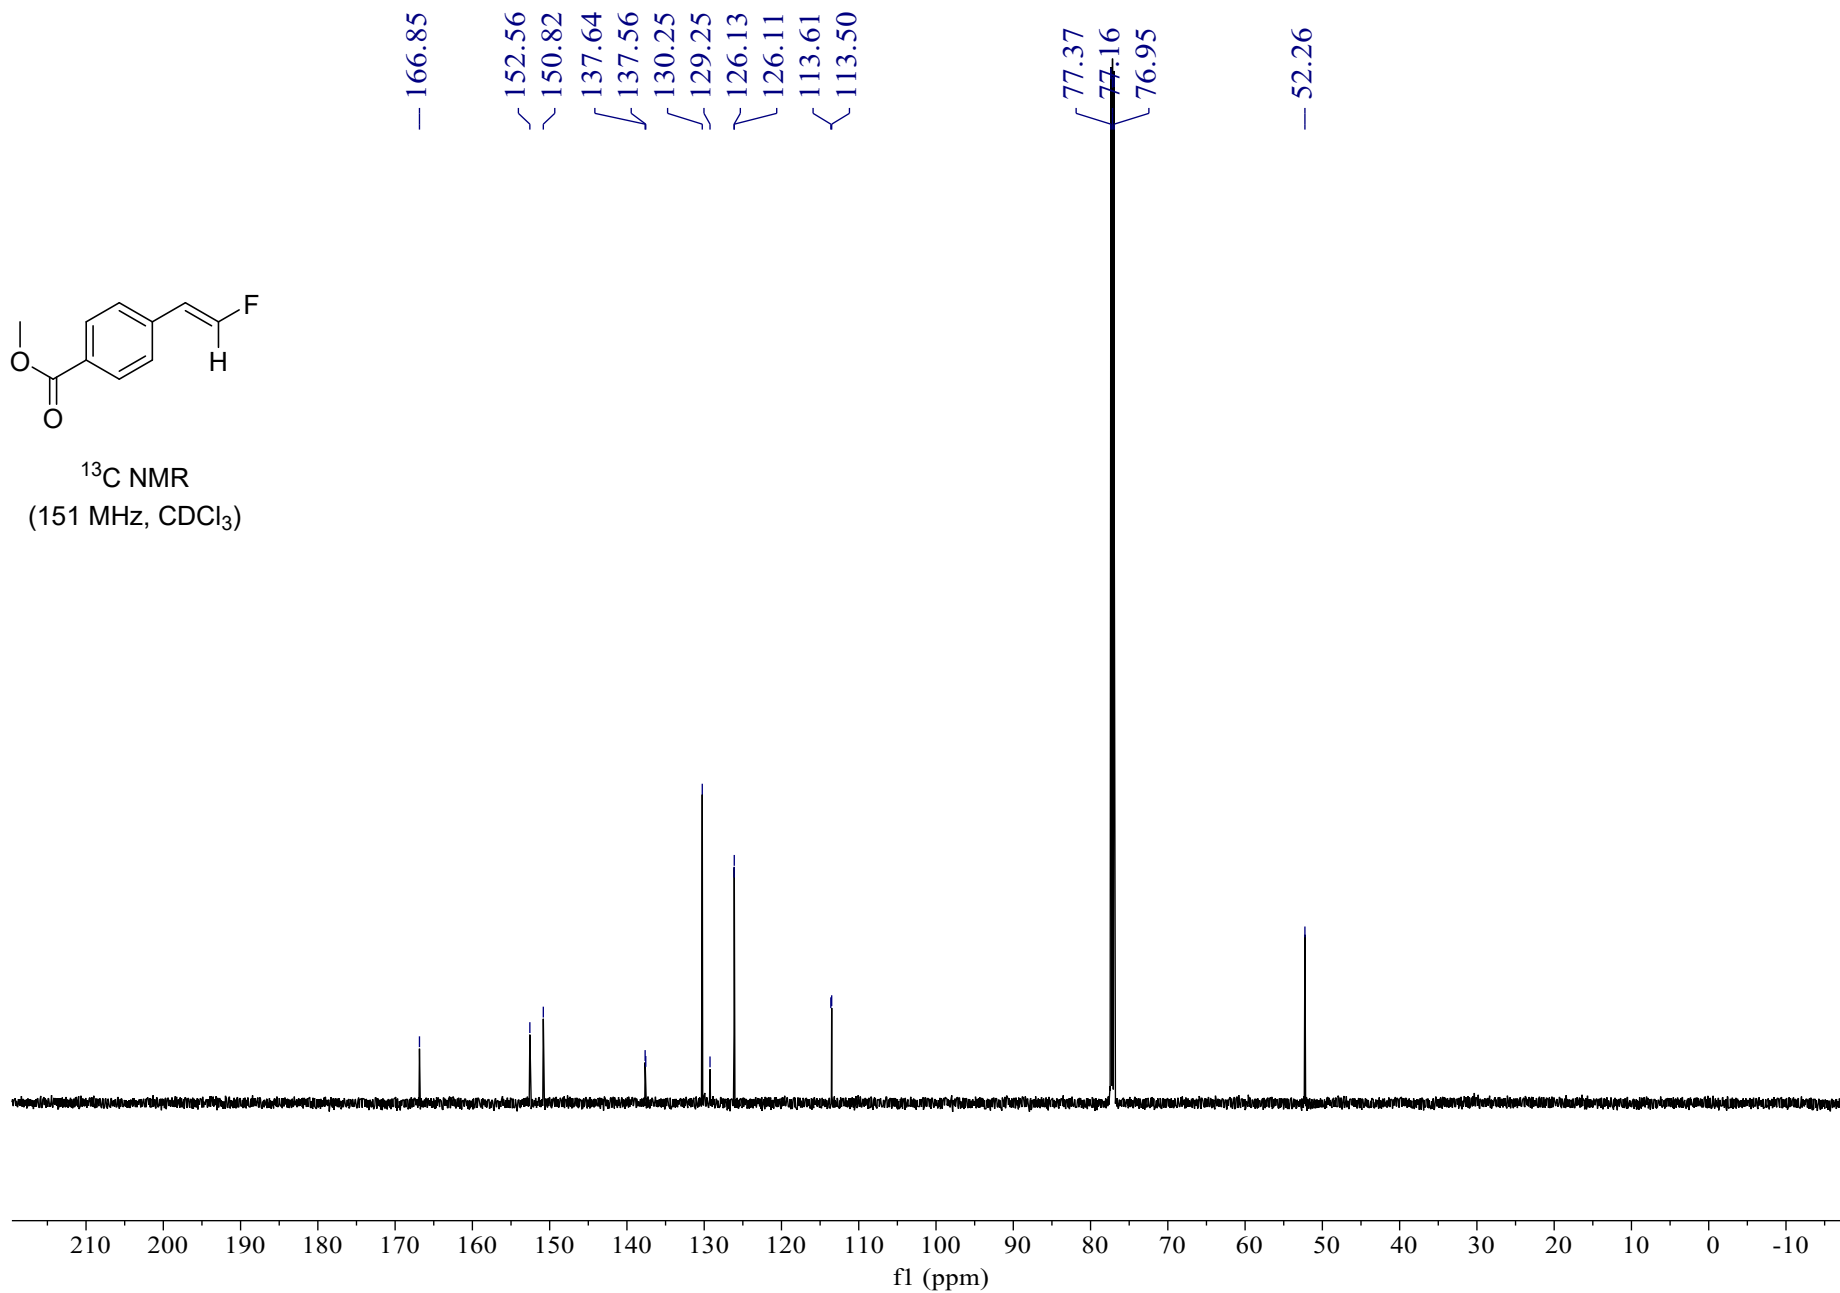

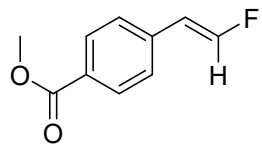

<sup>19</sup>F NMR  
(376 MHz, CDCl<sub>3</sub>)

-118.15  
-118.27  
-118.37  
-118.49  
-125.57  
-125.62  
-125.79  
-125.84

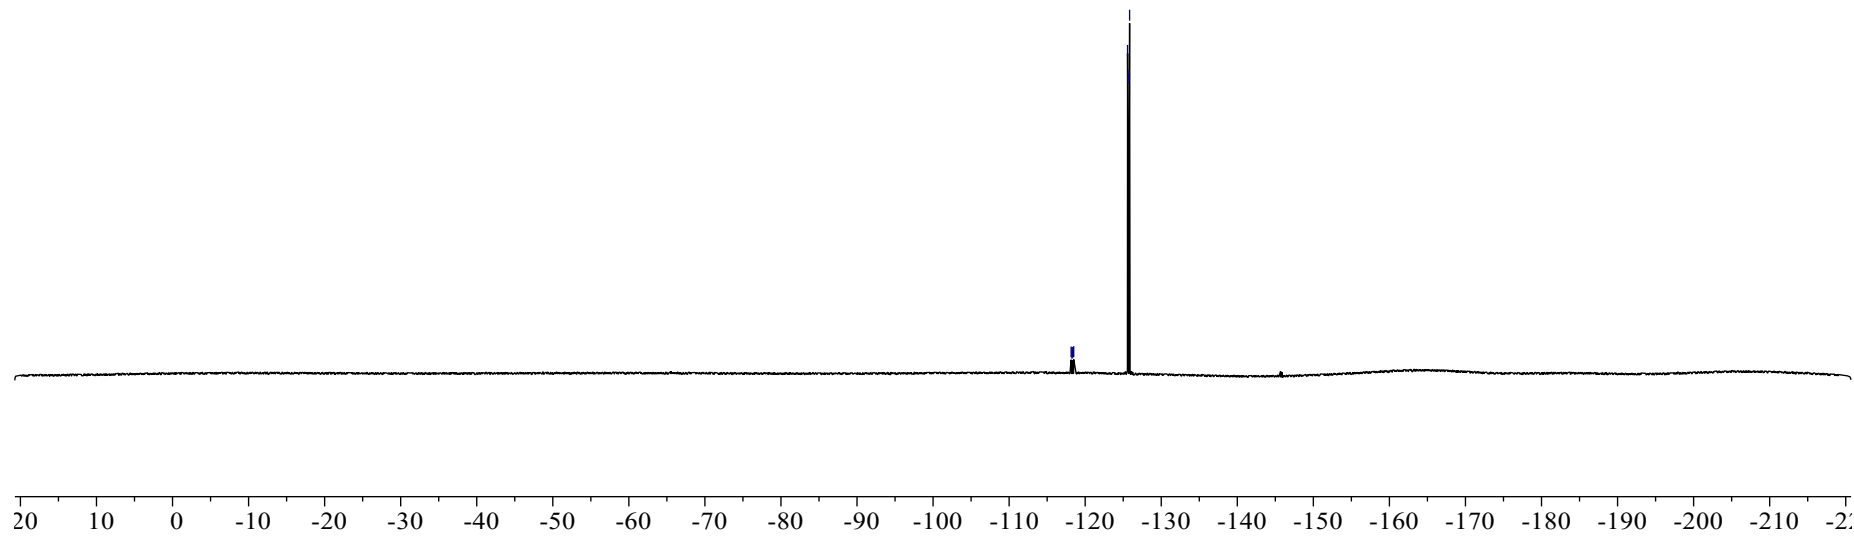



# Mass Spectrum SmartFormula Report

## Analysis Info

Analysis Name D:\LXMS\0106\_RC2\_01\_20519.d  
Method LC\_NO UV\_P50-1500\_6MIN.m  
Sample Name 0106

Acquisition D 2023-01-09 10:39:38

Operator Demo User  
Instrument compact 8255754.2017  
6

## Comment

## Acquisition Paramet

|             |            |               |          |                |           |
|-------------|------------|---------------|----------|----------------|-----------|
| Source Type | ESI        | Ion Polarity  | Positive | Set Nebulizer  | 3.0 Bar   |
| Focus       | Not active | Set Capillary | 4000 V   | Set Dry Heater | 200 °C    |
| Scan Begin  | 50 m/z     | Set End Plate | -500 V   | Set Dry Gas    | 8.0 l/min |

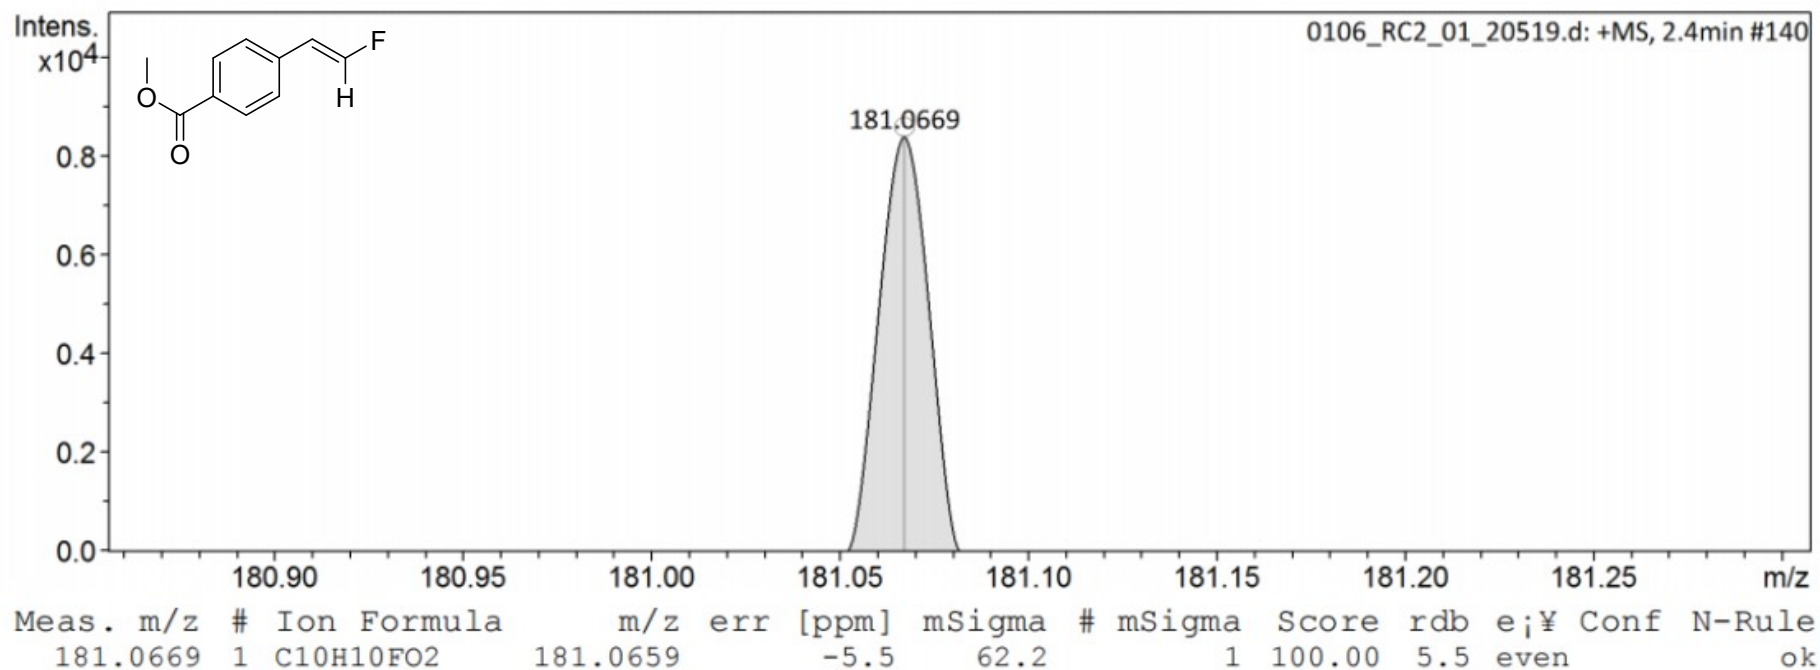

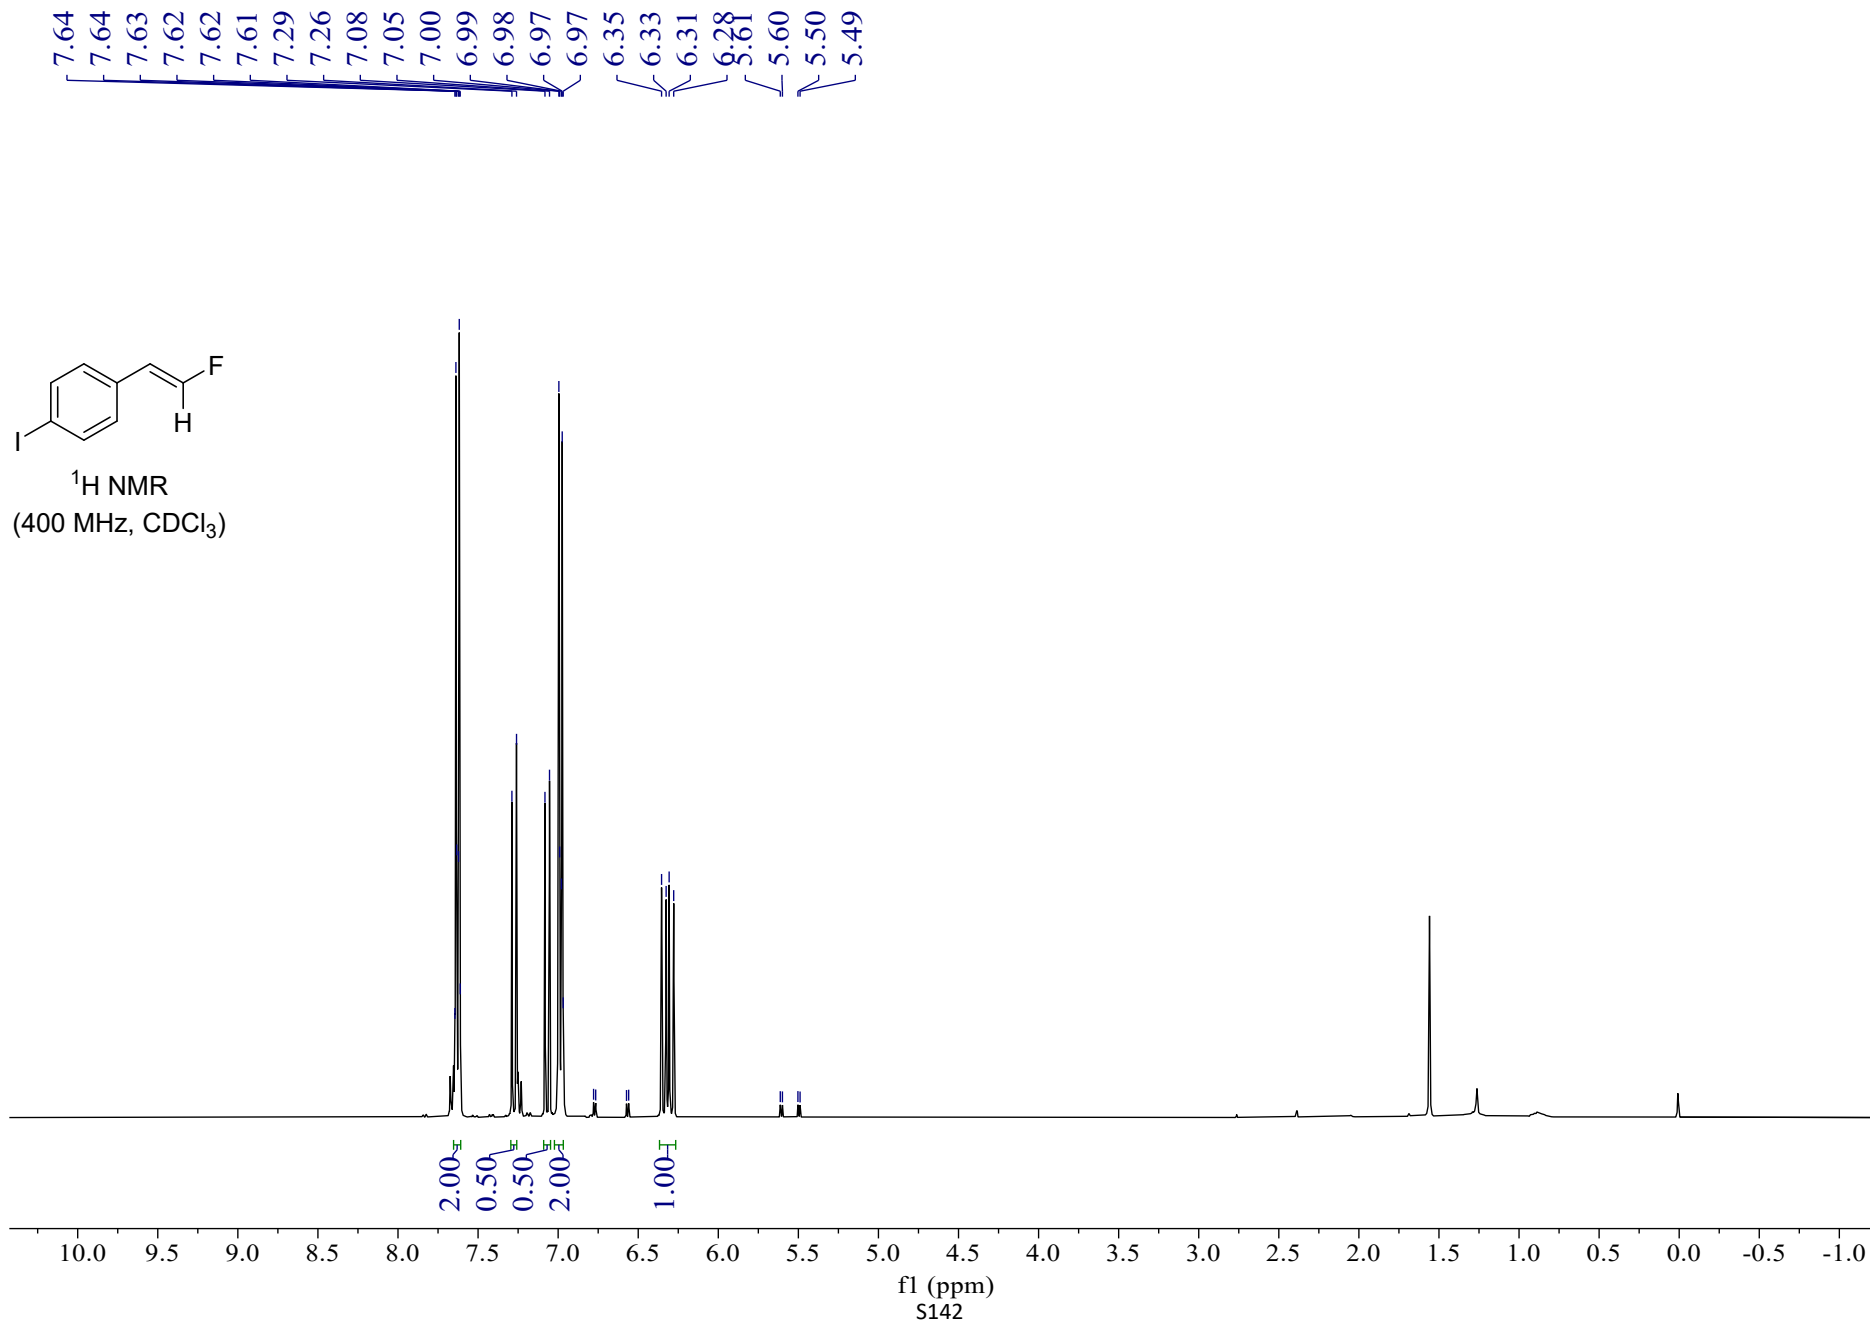

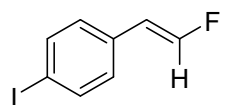

<sup>13</sup>C NMR  
(101 MHz, CDCl<sub>3</sub>)

- 151.96
- 149.36
- 137.98
- 132.40
- 132.28
- 128.04
- 128.01
- 113.35
- 113.18
- 92.66
- 77.48
- 77.16
- 76.84

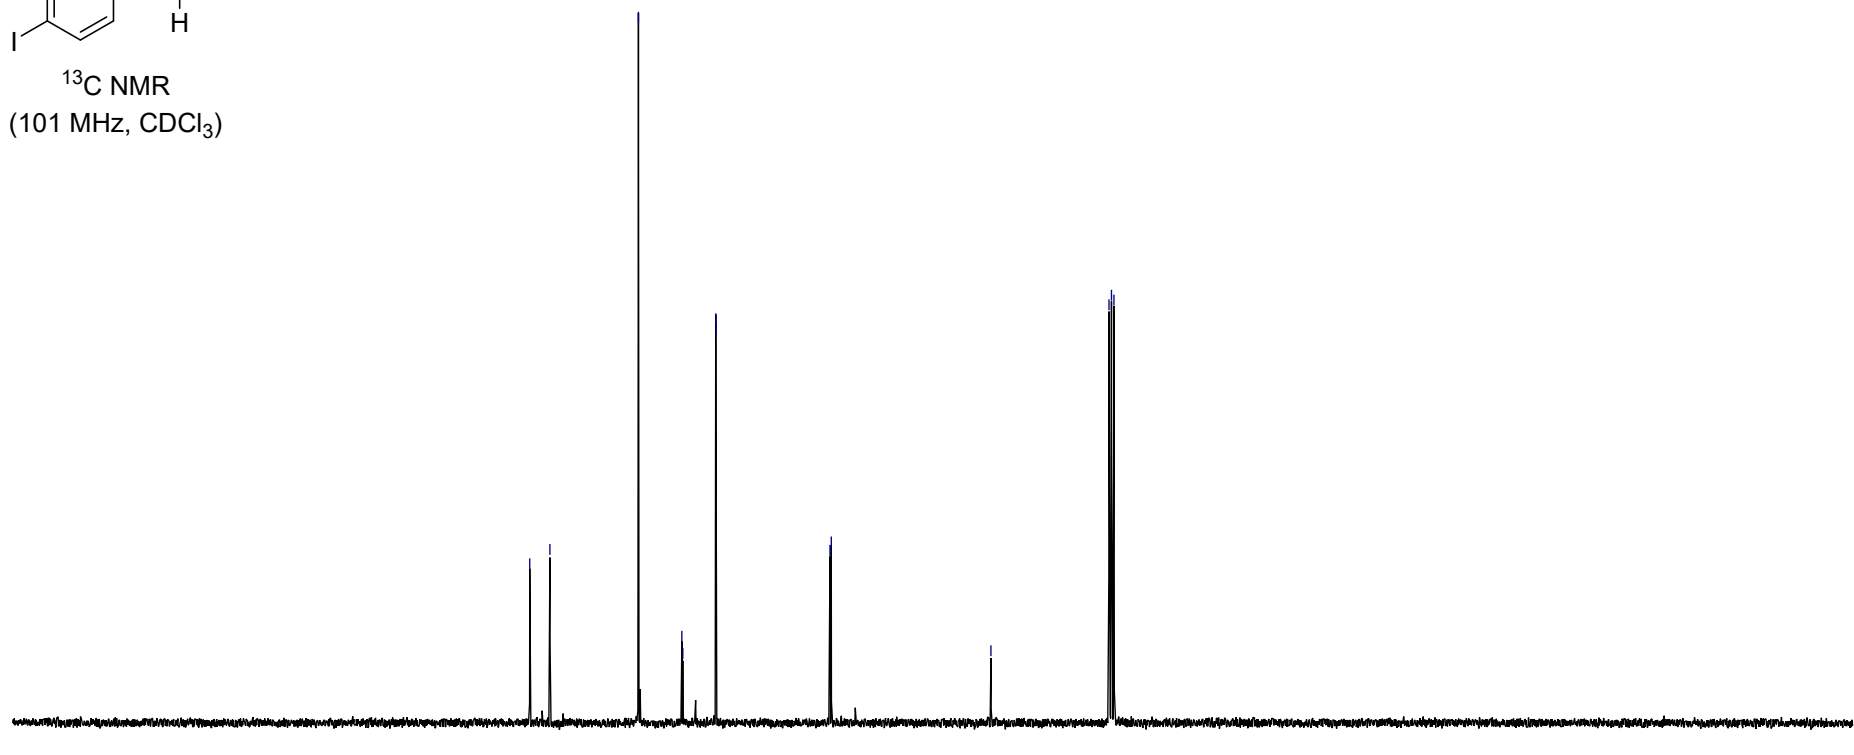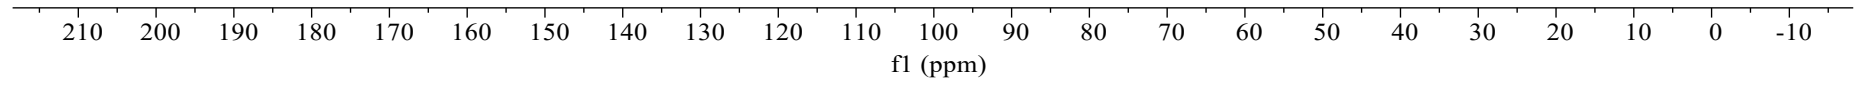

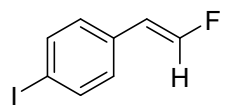

$^{19}\text{F}$  NMR  
(376 MHz,  $\text{CDCl}_3$ )

-120.16  
-120.28  
-120.38  
-120.50  
-127.90  
-127.95  
-128.12  
-128.17

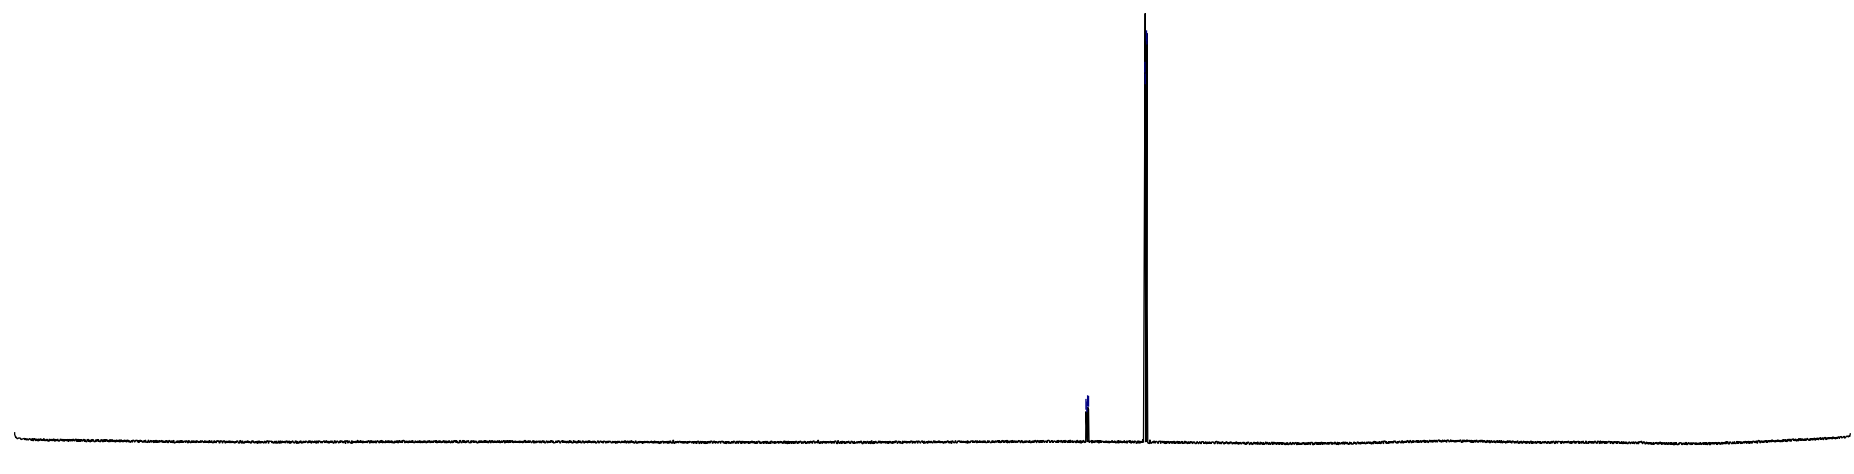

20 10 0 -10 -20 -30 -40 -50 -60 -70 -80 -90 -100 -110 -120 -130 -140 -150 -160 -170 -180 -190 -200 -210 -220

f1 (ppm)

ix-92 #121 RT: 0.91 AV: 1 NL: 2.66E4  
 T: FTMS + p ESI Full ms [100.0000-1500.0000]

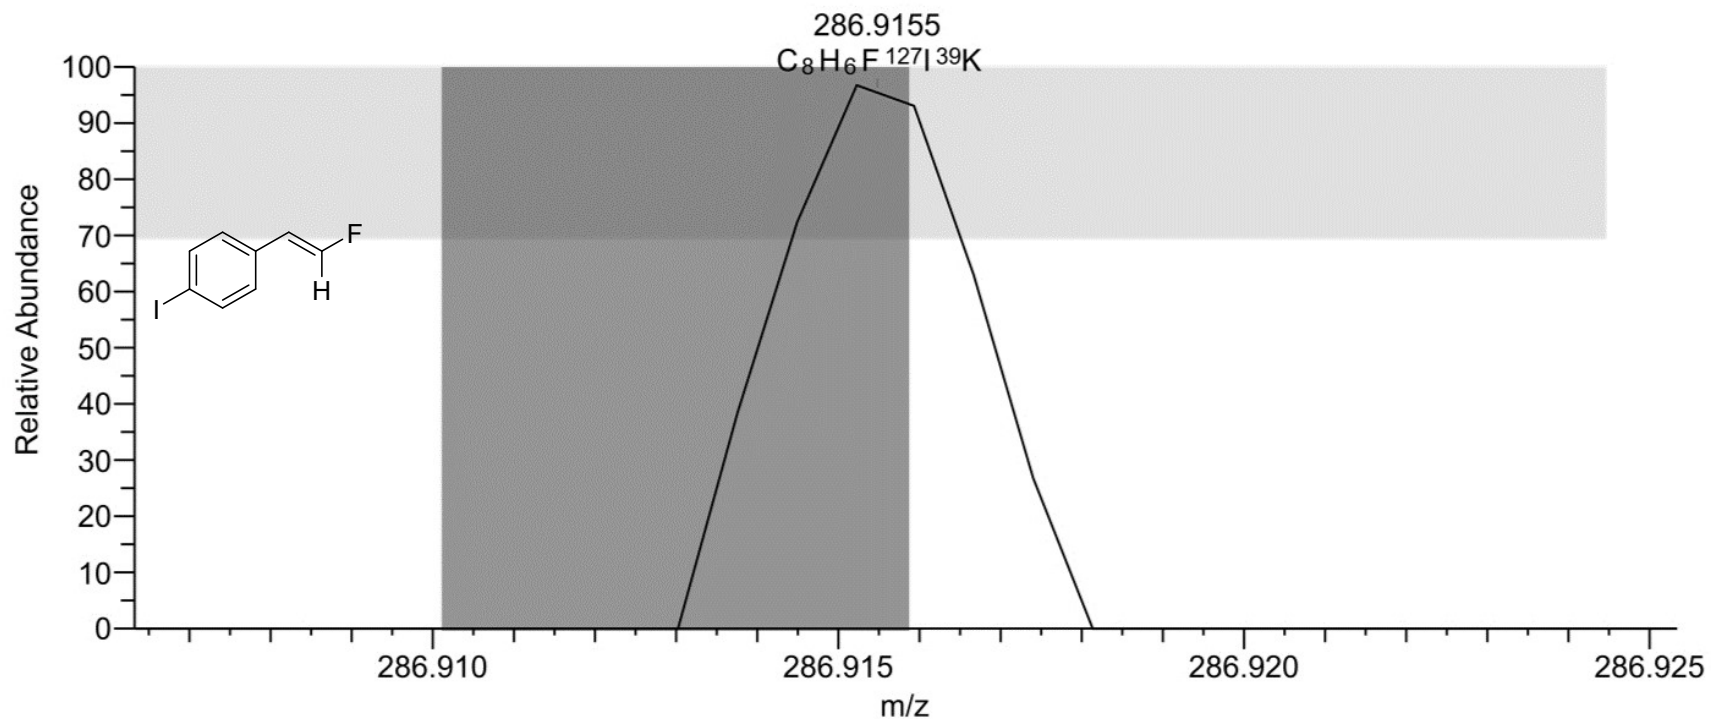

| Peak M...    | Display...                   | S Fit                    | RDB  | Delta [p... | Theo....      | Rank | Combin... | # Matc... | # Misse... | MS Cov... | Pattern... | MSMS...          |
|--------------|------------------------------|--------------------------|------|-------------|---------------|------|-----------|-----------|------------|-----------|------------|------------------|
| 286.915<br>5 | $C_8H_6F^{127}$<br>$I^{39}K$ | 37.9690<br>069517<br>735 | 4.50 | 8.77        | 286.912<br>98 | 1    | 96.74     | 1         | 0          | 100       | 100        | (Collect<br>ion) |

7.61  
7.60  
7.60  
7.59  
7.59  
7.58  
7.50  
7.50  
7.50  
7.48  
7.48  
7.47  
7.47  
7.46  
7.45  
7.45  
7.42  
7.40  
7.40  
7.40  
7.38  
7.36  
7.33  
7.26  
7.26  
7.26  
7.25  
7.24  
7.24  
7.24  
7.15  
7.13  
6.82  
6.80  
6.61  
6.60  
6.52  
6.49  
6.47  
6.44  
5.76  
5.75  
5.65  
5.63

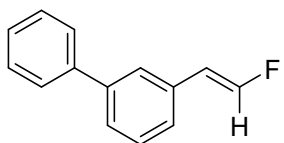

<sup>1</sup>H NMR  
(400 MHz, CDCl<sub>3</sub>)

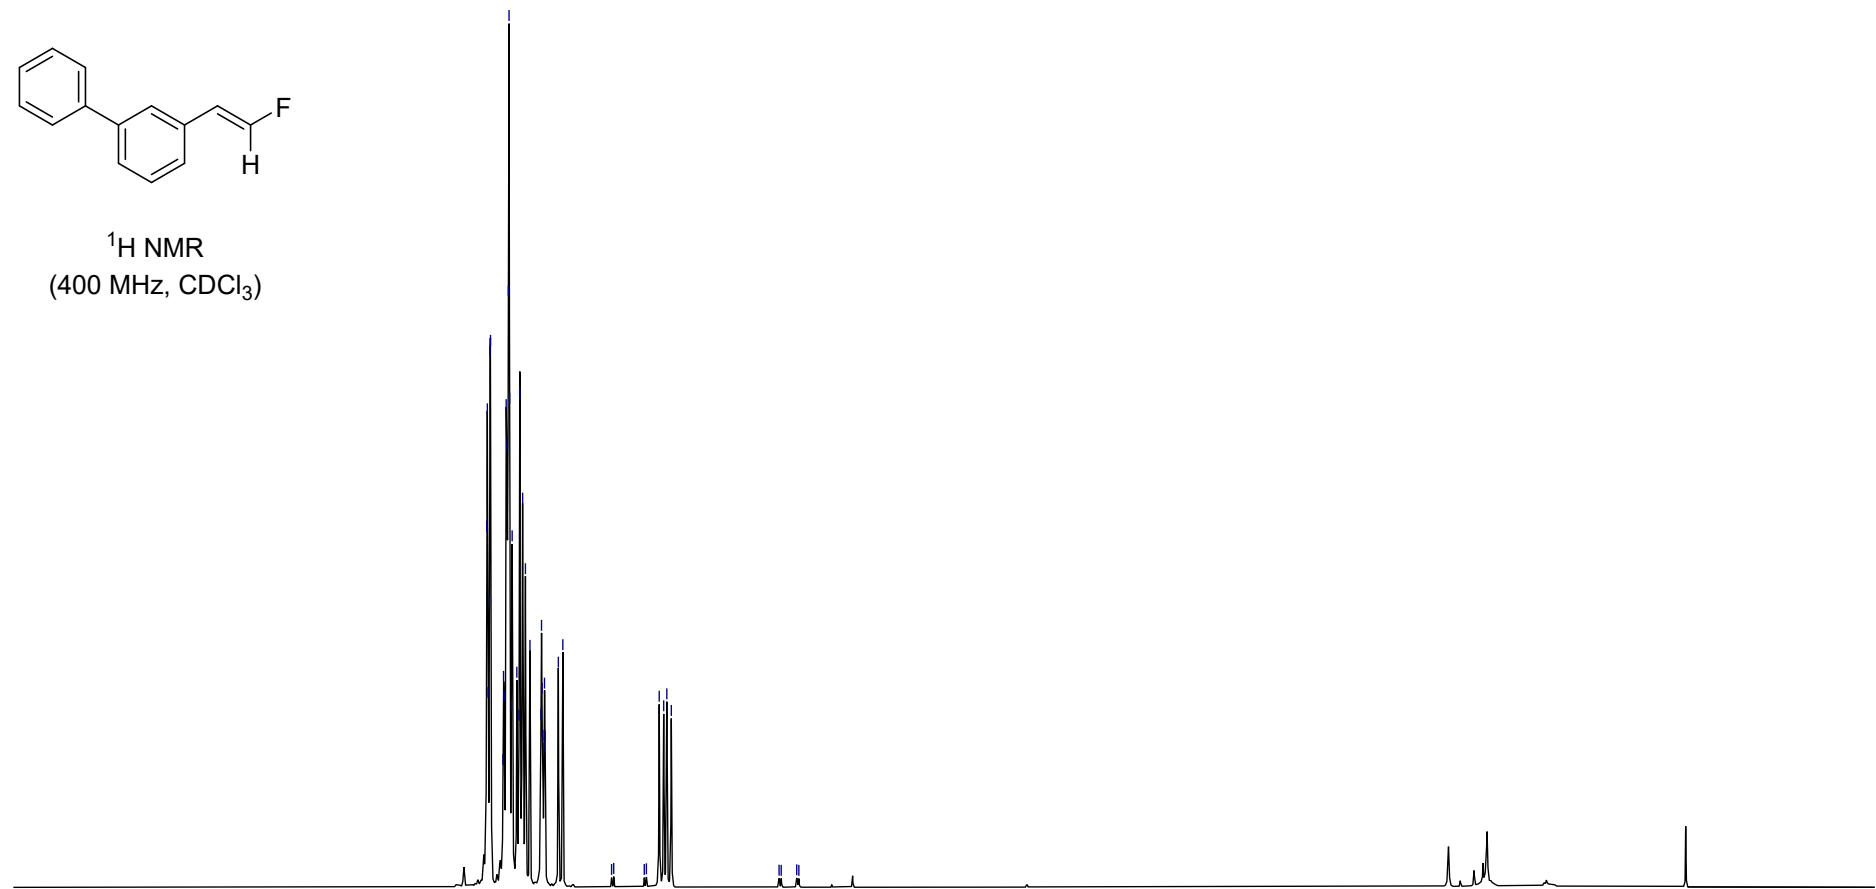

2.00  
4.00  
2.00  
0.50  
1.00  
0.50  
1.00

10.5 10.0 9.5 9.0 8.5 8.0 7.5 7.0 6.5 6.0 5.5 5.0 4.5 4.0 3.5 3.0 2.5 2.0 1.5 1.0 0.5 0.0 -0.5 -1.0  
f1 (ppm)  
S146

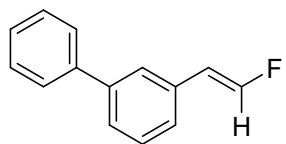

<sup>13</sup>C NMR  
(101 MHz, CDCl<sub>3</sub>)

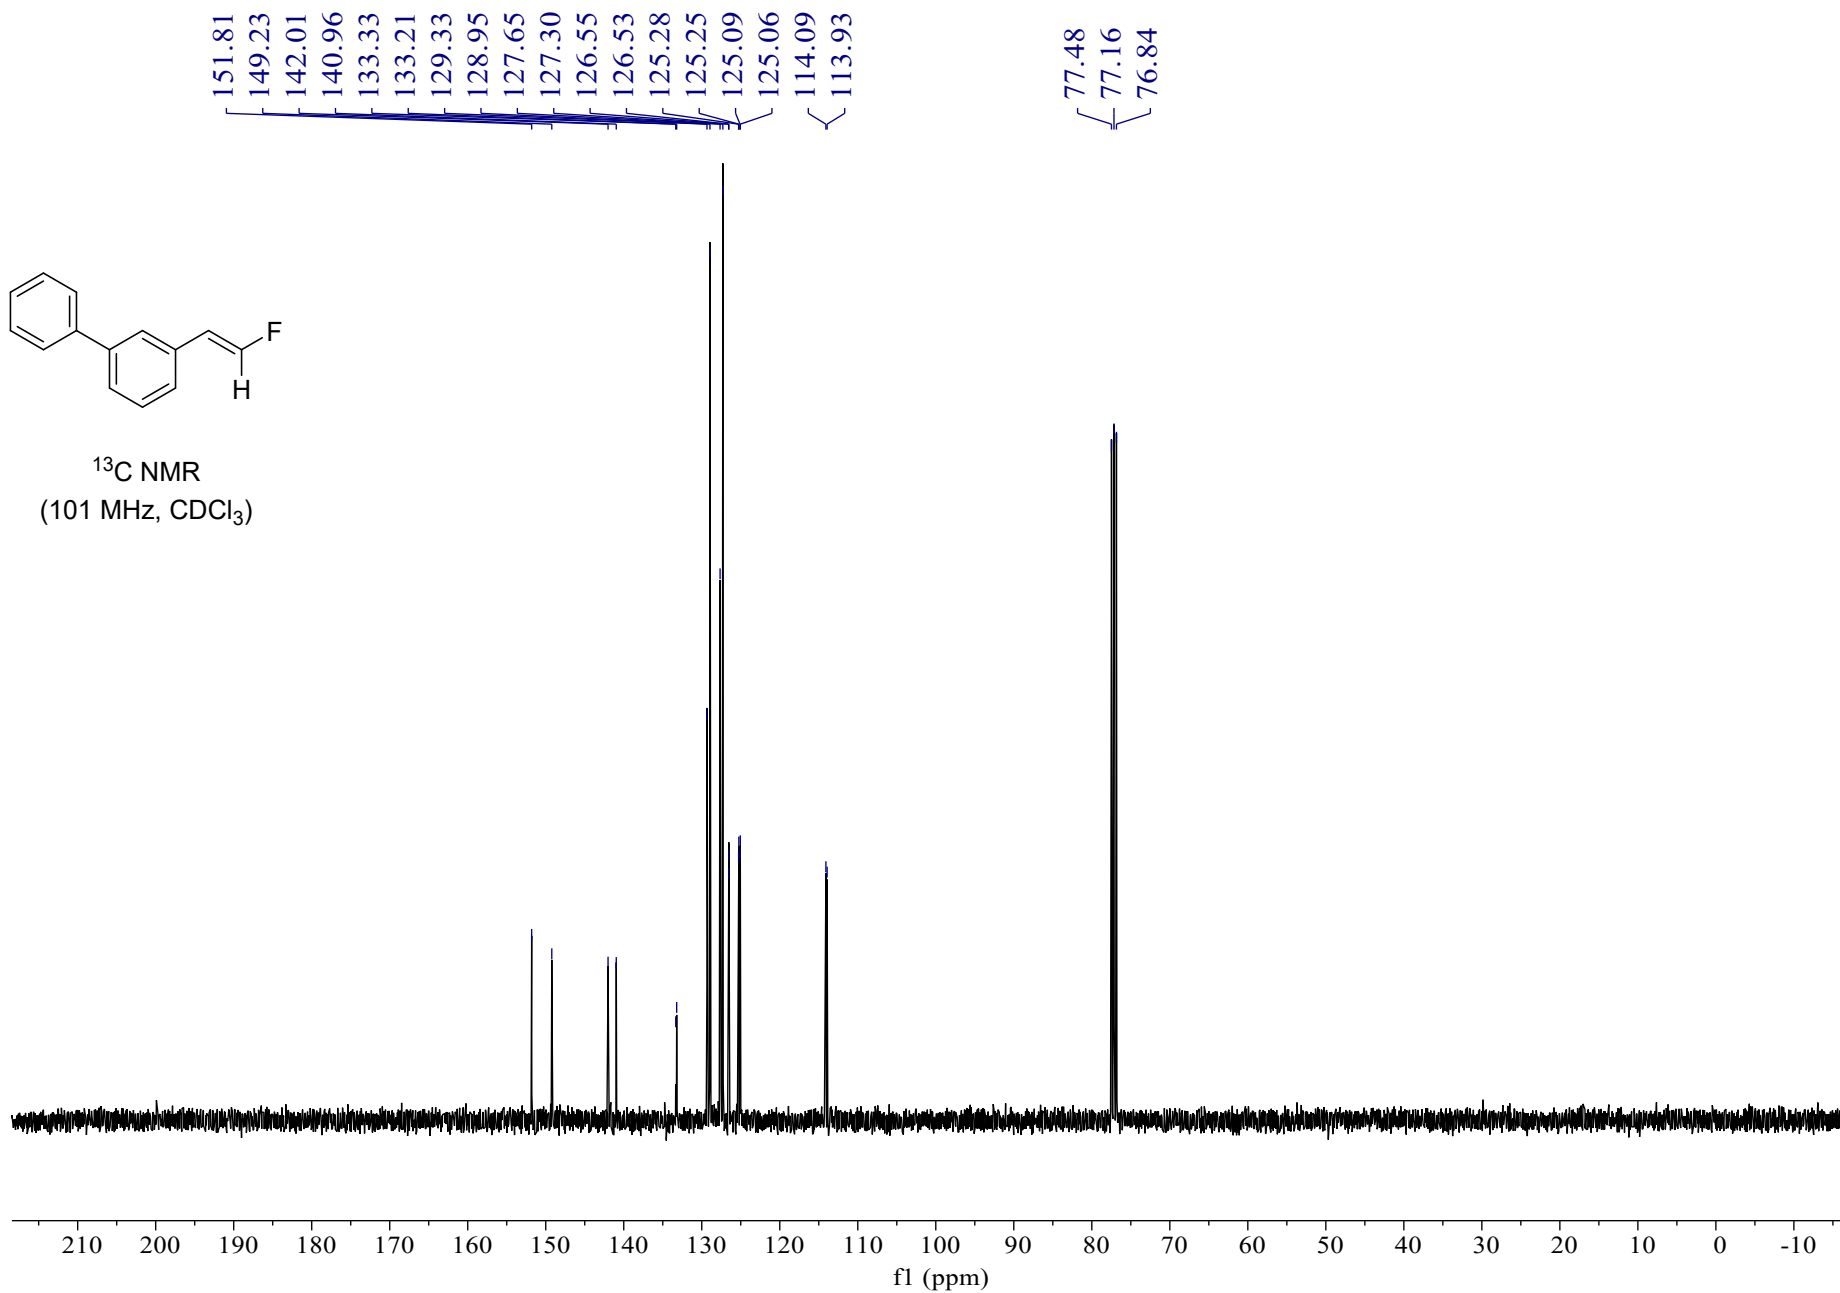

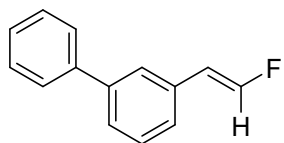

$^{19}\text{F}$  NMR  
(376 MHz,  $\text{CDCl}_3$ )

-121.30  
-121.41  
-121.52  
-121.64  
-129.09  
-129.14  
-129.31  
-129.37

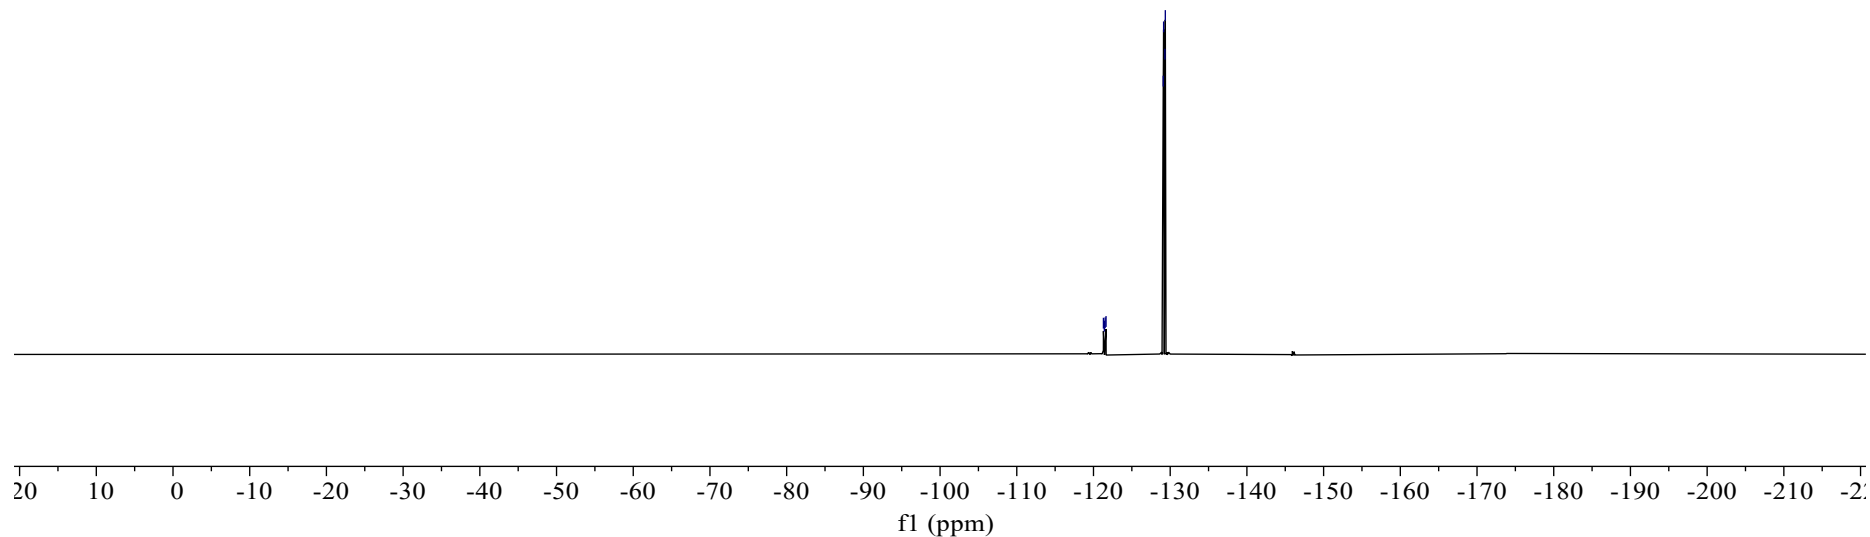



# Mass Spectrum SmartFormula Report

## Analysis Info

Analysis Name D:\LXMS\0106\_RB3\_01\_20512.d  
Method LC\_NO UV\_P50-1500\_6MIN.m  
Sample Name 0106

Acquisition D 2023-01-09 9:47:25

Operator Demo User

Instrument compact 8255754.2017  
6

## Comment

## Acquisition Paramet

|             |            |               |          |                |           |
|-------------|------------|---------------|----------|----------------|-----------|
| Source Type | ESI        | Ion Polarity  | Positive | Set Nebulizer  | 3.0 Bar   |
| Focus       | Not active | Set Capillary | 4000 V   | Set Dry Heater | 200 °C    |
| Scan Begin  | 50 m/z     | Set End Plate | -500 V   | Set Dry Gas    | 8.0 l/min |

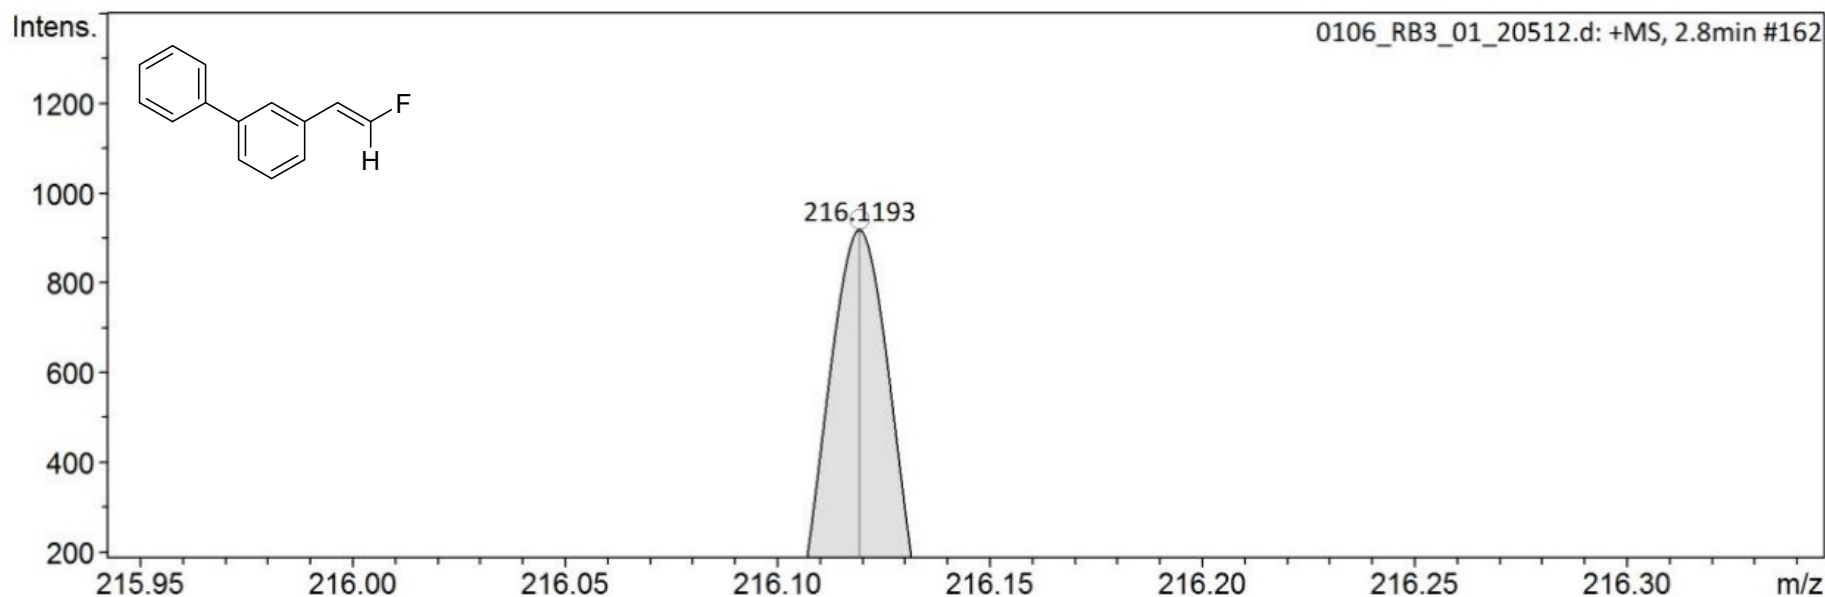

| Meas. m/z | # | Ion Formula | m/z      | err [ppm] | mSigma | # | mSigma | Score | rdb  | e;¥ | Conf | N-Rule |
|-----------|---|-------------|----------|-----------|--------|---|--------|-------|------|-----|------|--------|
| 216.1193  | 1 | C14H15FN    | 216.1183 | -4.7      | n.a.   | 1 | 100.00 | 7.5   | even |     |      | ok     |

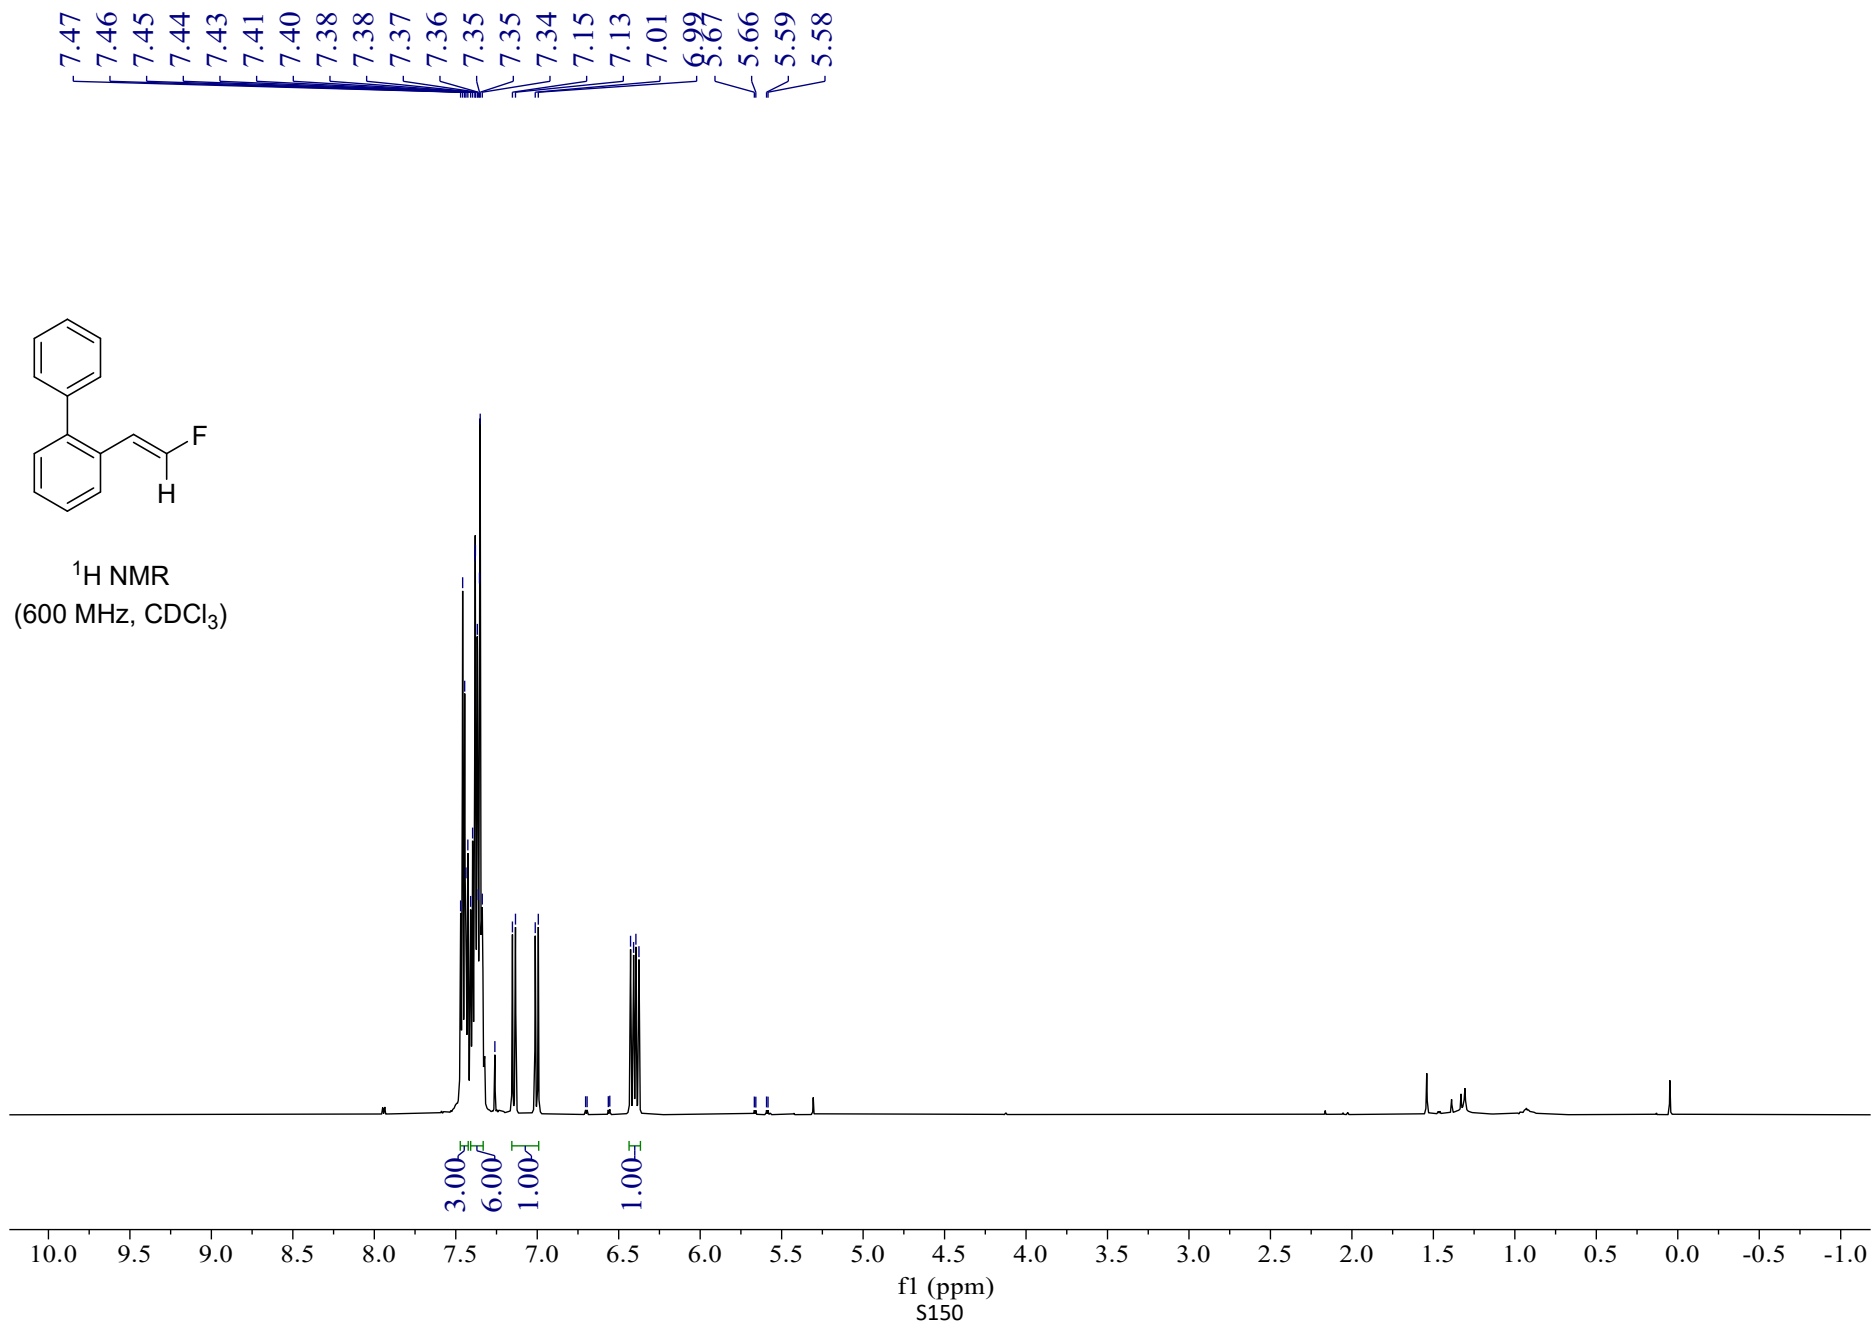

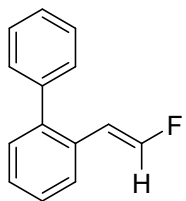

$^{13}\text{C}$  NMR  
(101 MHz,  $\text{CDCl}_3$ )

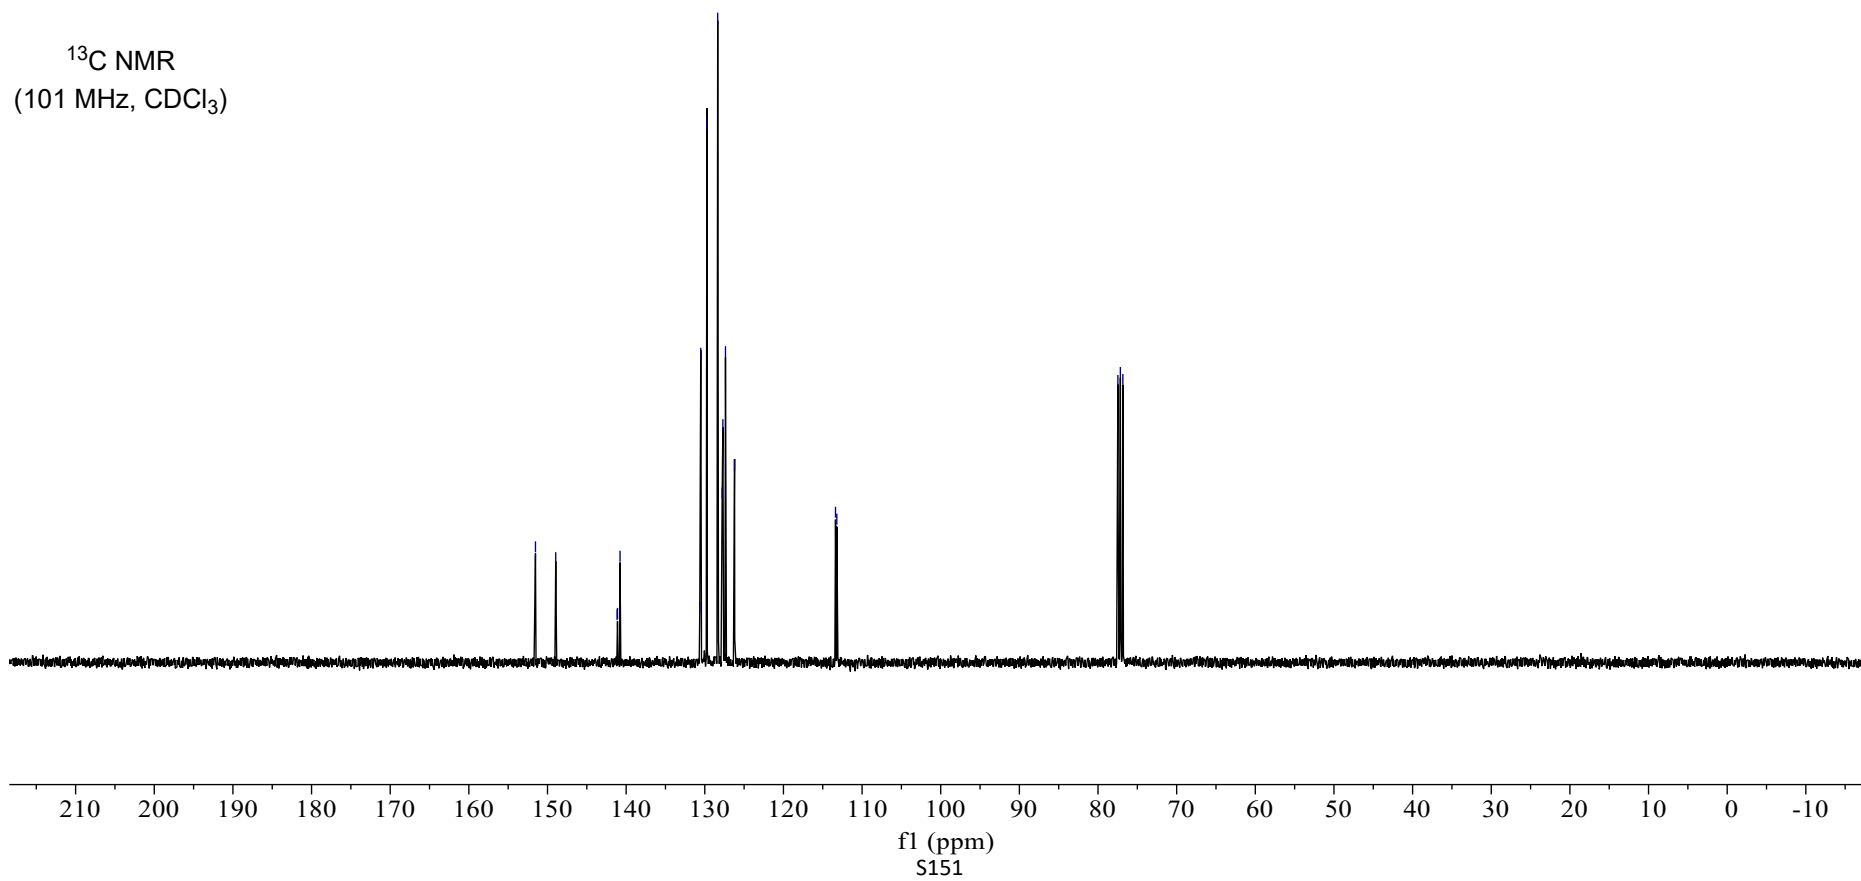

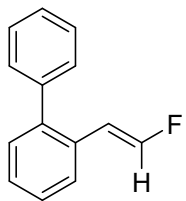

<sup>19</sup>F NMR  
(565 MHz, CDCl<sub>3</sub>)

-124.87  
-124.95  
-125.01  
-125.09  
-127.03  
-127.06  
-127.18  
-127.21

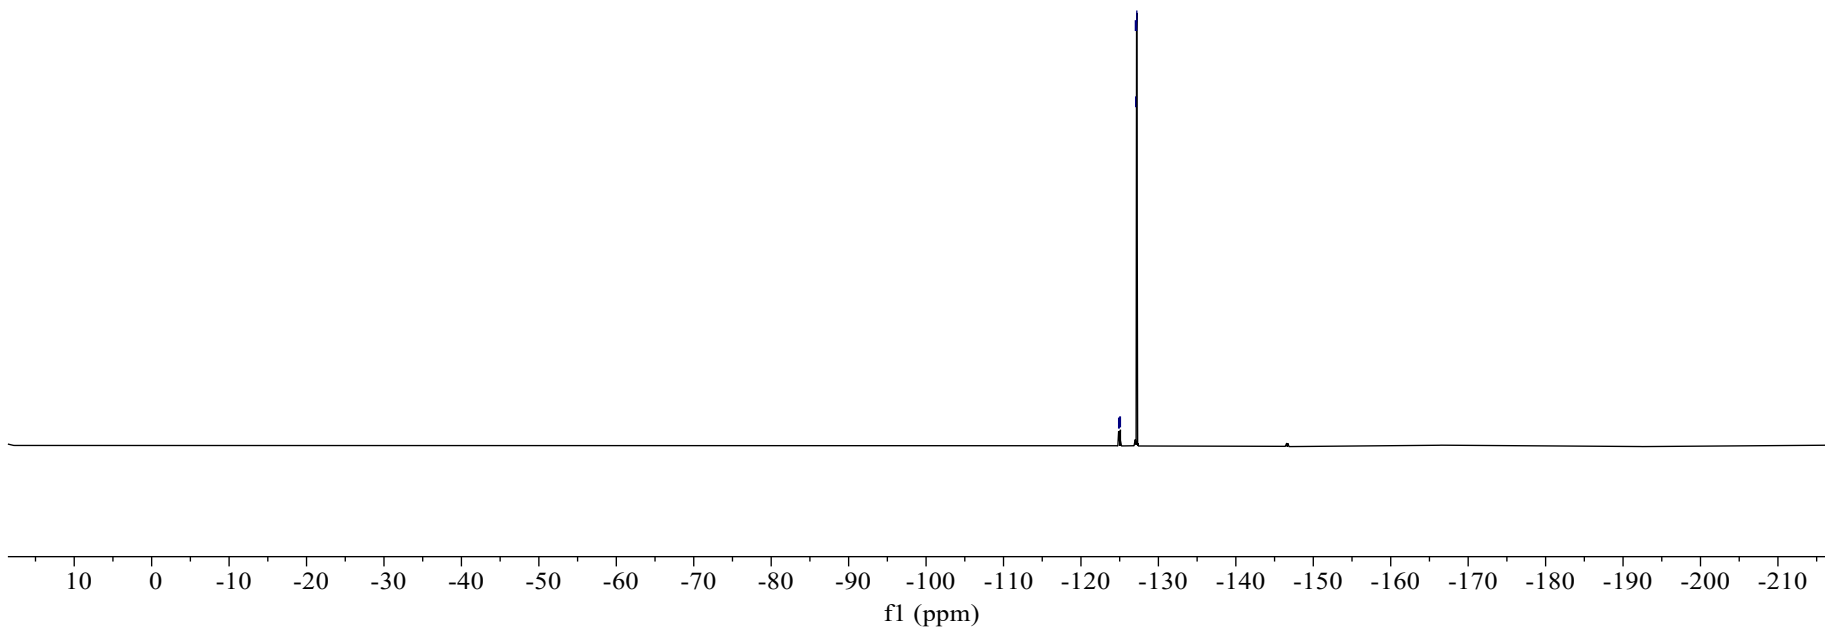

# Mass Spectrum SmartFormula Report

## Analysis Info

Analysis Name D:\LXMS\0306\_BC4\_01\_22068.d  
Method LC\_NO UV\_P50-1500\_10MIN.m  
Sample Name 0306

Acquisition D 2023-03-10 16:35:21

Operator Demo User  
Instrument compact 8255754.2017  
6

## Comment

## Acquisition Paramet

|             |            |               |          |                |           |
|-------------|------------|---------------|----------|----------------|-----------|
| Source Type | ESI        | Ion Polarity  | Positive | Set Nebulizer  | 3.0 Bar   |
| Focus       | Not active | Set Capillary | 4000 V   | Set Dry Heater | 200 °C    |
| Scan Begin  | 50 m/z     | Set End Plate | -500 V   | Set Dry Gas    | 8.0 l/min |

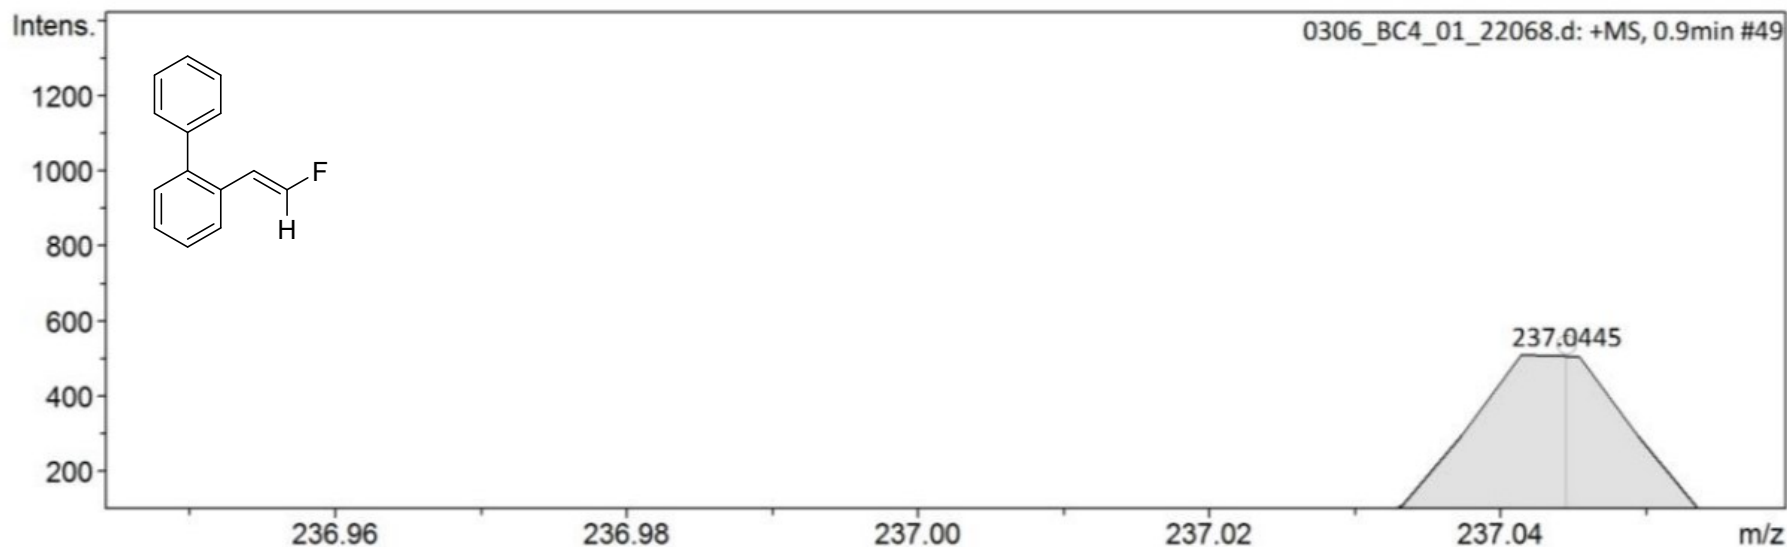

| Meas. m/z | # | Ion Formula | m/z      | err [ppm] | mSigma | # | mSigma | Score | rdb  | e;¥ | Conf | N-Rule |
|-----------|---|-------------|----------|-----------|--------|---|--------|-------|------|-----|------|--------|
| 237.0445  | 1 | C14H11FK    | 237.0476 | 13.1      | n.a.   | 1 | 100.00 | 8.5   | even |     |      | ok     |

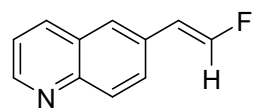

<sup>1</sup>H NMR  
(600 MHz, CDCl<sub>3</sub>)

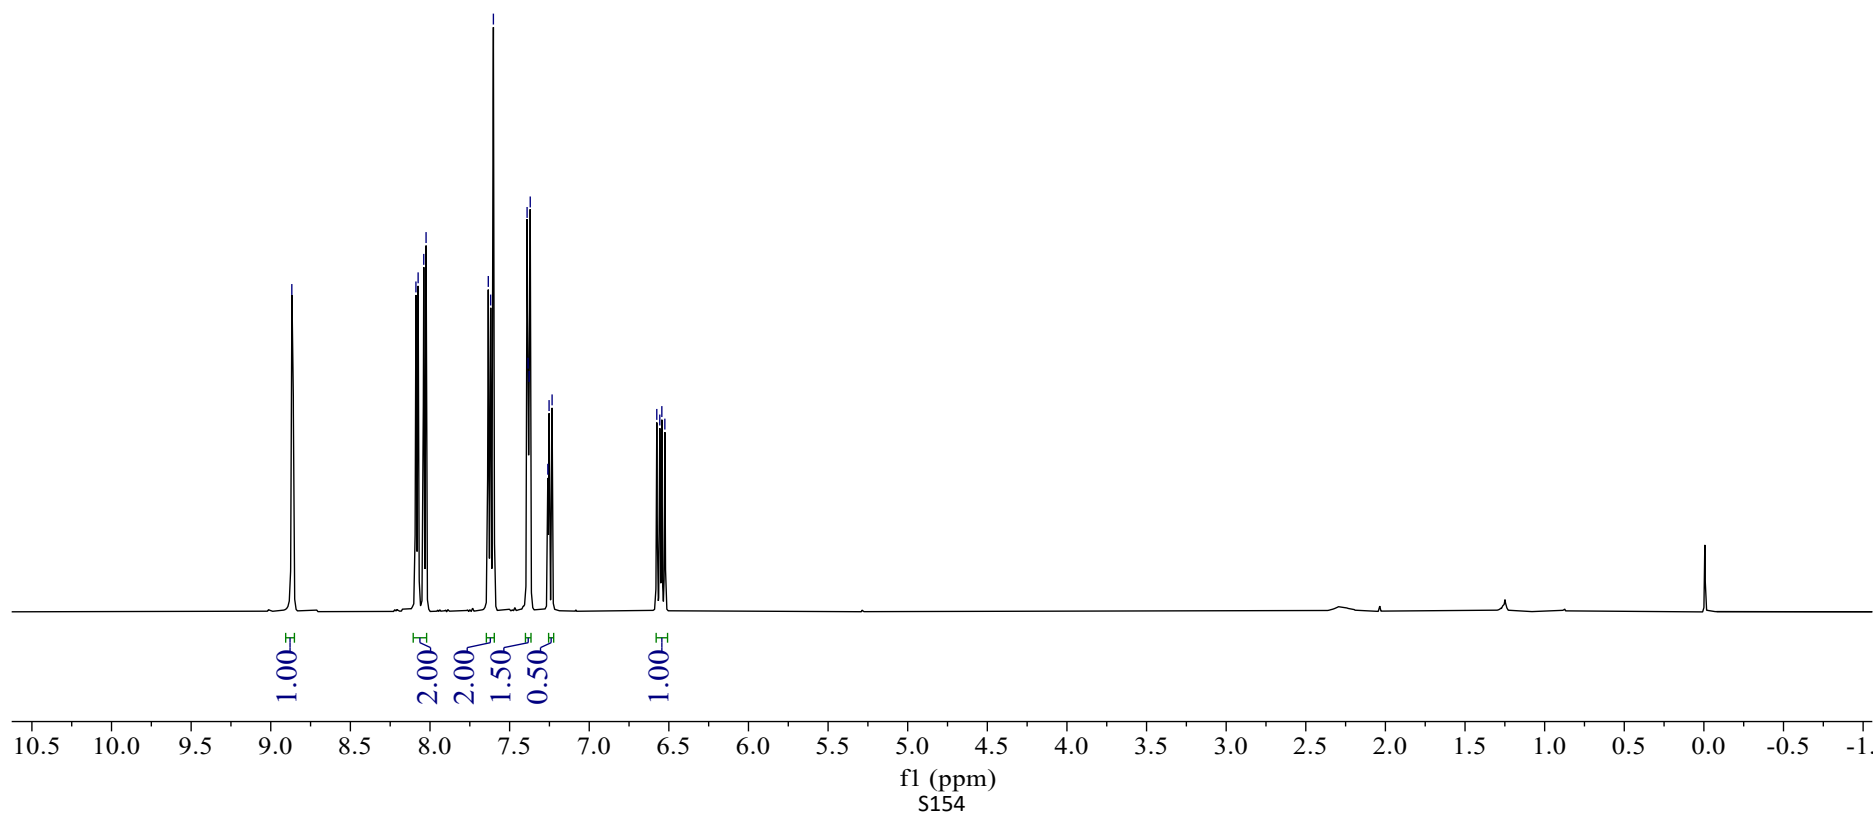

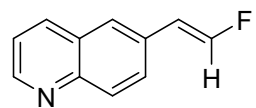

$^{13}\text{C}$  NMR  
(151 MHz,  $\text{CDCl}_3$ )

152.05  
150.38  
150.32  
147.92  
135.86  
131.20  
131.12  
130.14  
128.61  
127.15  
125.45  
125.42  
121.76  
113.75  
113.64  
77.37  
77.16  
76.95

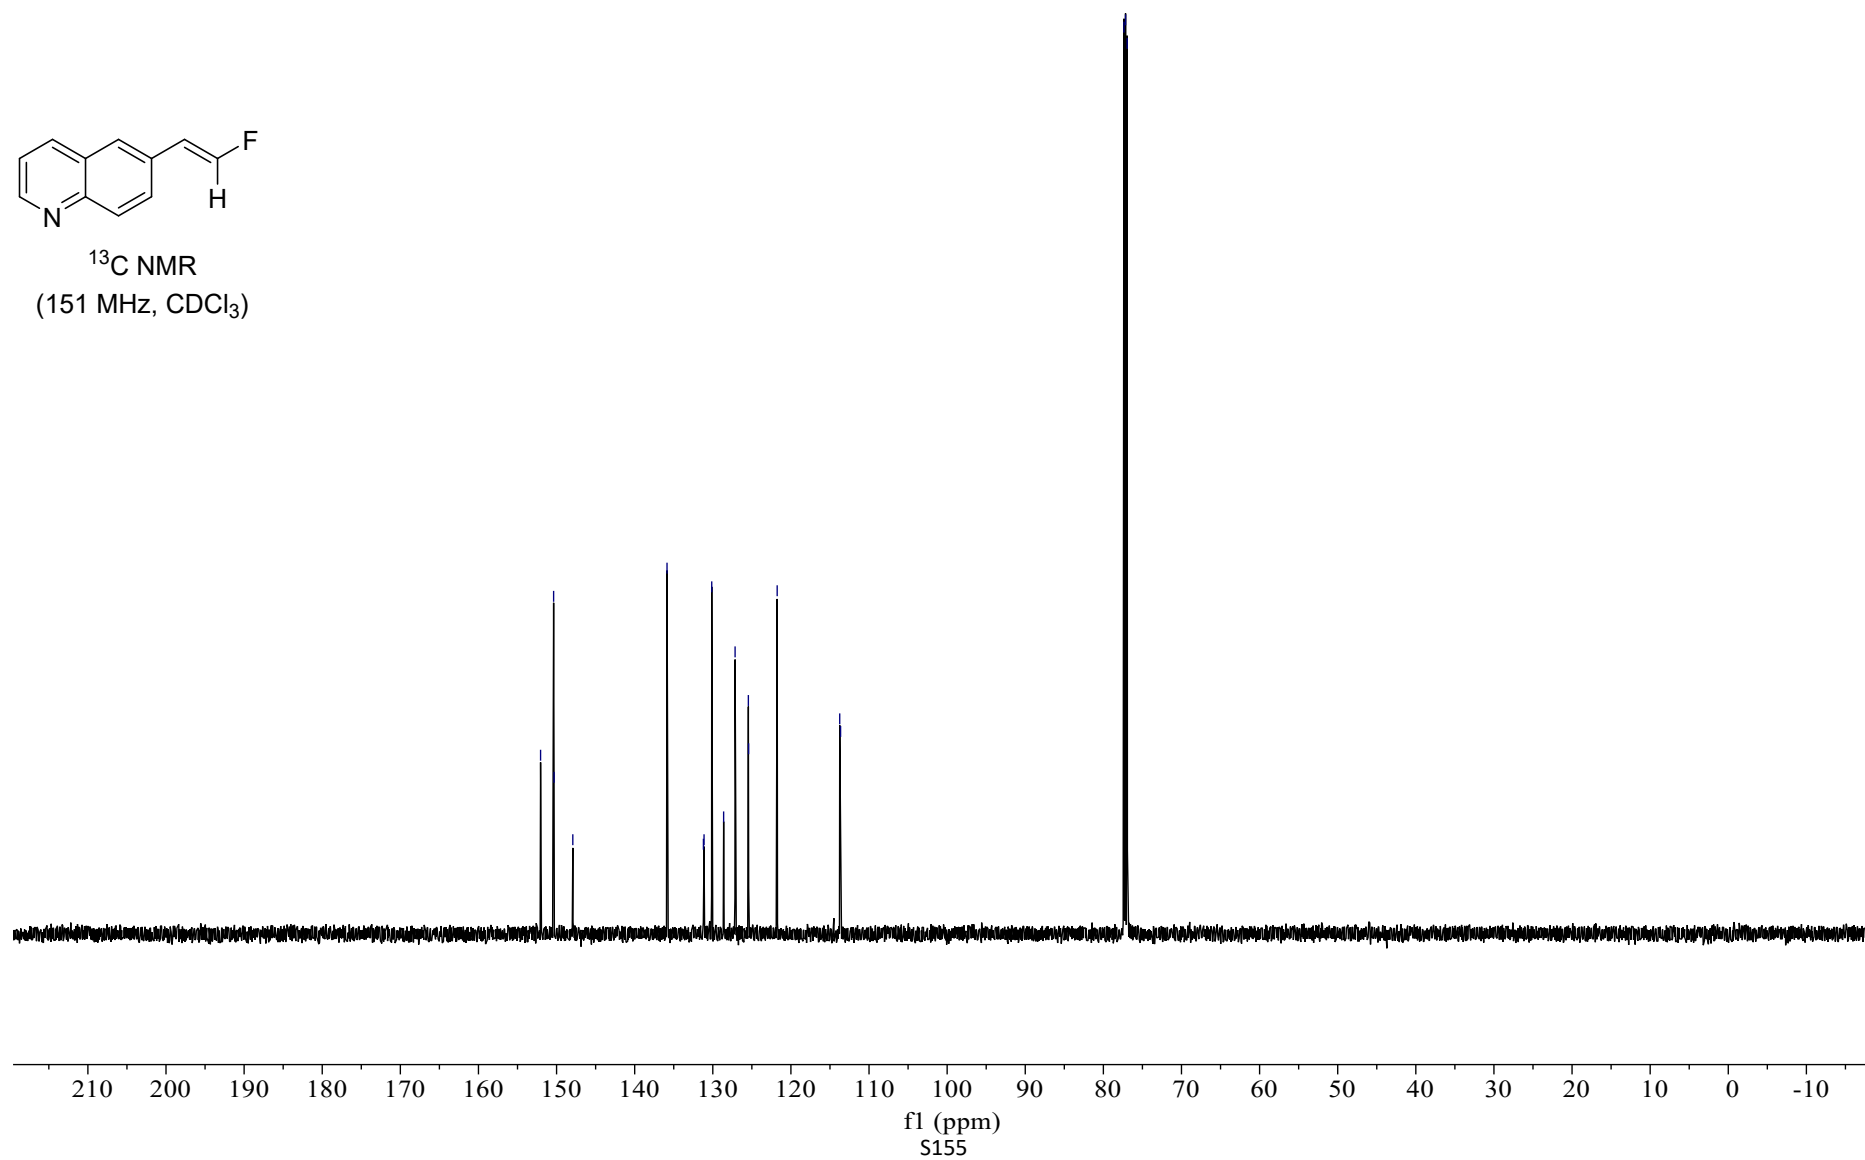

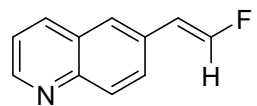

<sup>19</sup>F NMR  
(376 MHz, CDCl<sub>3</sub>)

-120.42  
-120.53  
-120.63  
-120.75  
-127.35  
-127.40  
-127.57  
-127.62

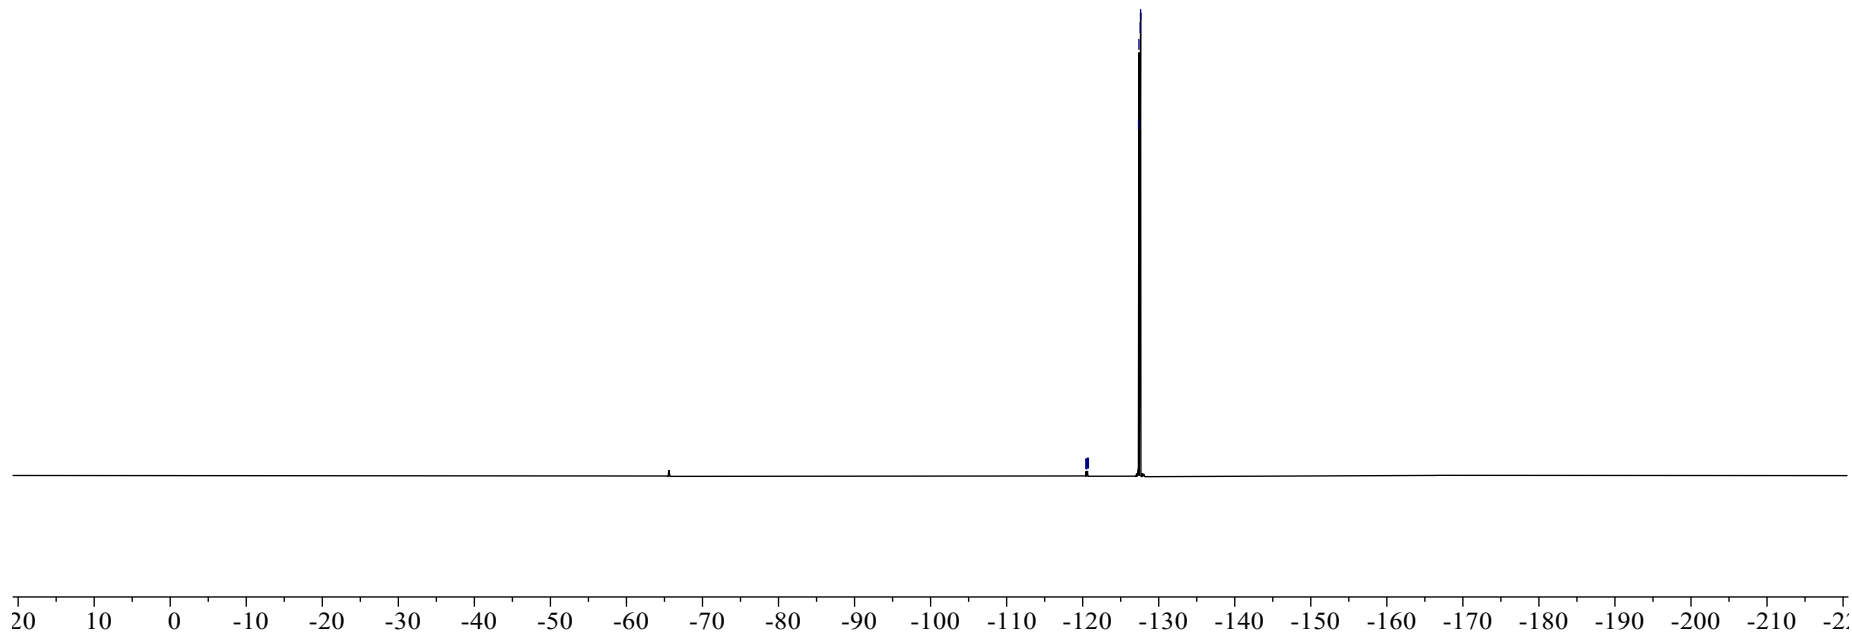



# Mass Spectrum SmartFormula Report

## Analysis Info

Analysis Name D:\LXMS\0106\_RB5\_01\_20514.d  
Method LC\_NO UV\_P50-1500\_6MIN.m  
Sample Name 0106

Acquisition D 2023-01-09 10:02:17

Operator Demo User

Instrument compact 8255754.2017  
6

## Comment

## Acquisition Paramet

|             |            |               |          |                |           |
|-------------|------------|---------------|----------|----------------|-----------|
| Source Type | ESI        | Ion Polarity  | Positive | Set Nebulizer  | 3.0 Bar   |
| Focus       | Not active | Set Capillary | 4000 V   | Set Dry Heater | 200 °C    |
| Scan Begin  | 50 m/z     | Set End Plate | -500 V   | Set Dry Gas    | 8.0 l/min |

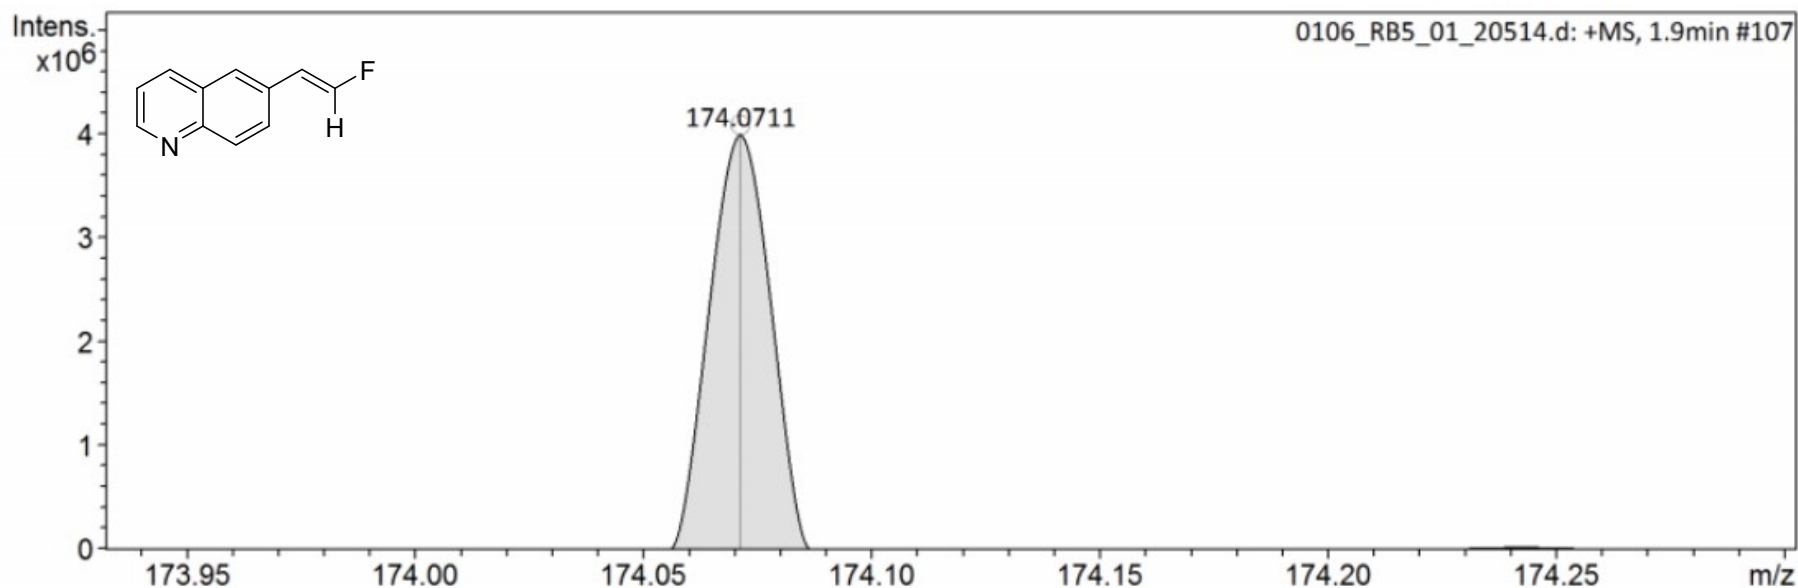

| Meas. m/z | # | Ion Formula | m/z      | err [ppm] | mSigma | # | mSigma | Score | rdb  | e;¥ | Conf | N-Rule |
|-----------|---|-------------|----------|-----------|--------|---|--------|-------|------|-----|------|--------|
| 174.0711  | 1 | C11H9FN     | 174.0714 | 1.3       | 0.5    | 1 | 100.00 | 7.5   | even |     |      | ok     |

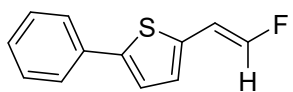

<sup>1</sup>H NMR  
(400 MHz, CDCl<sub>3</sub>)

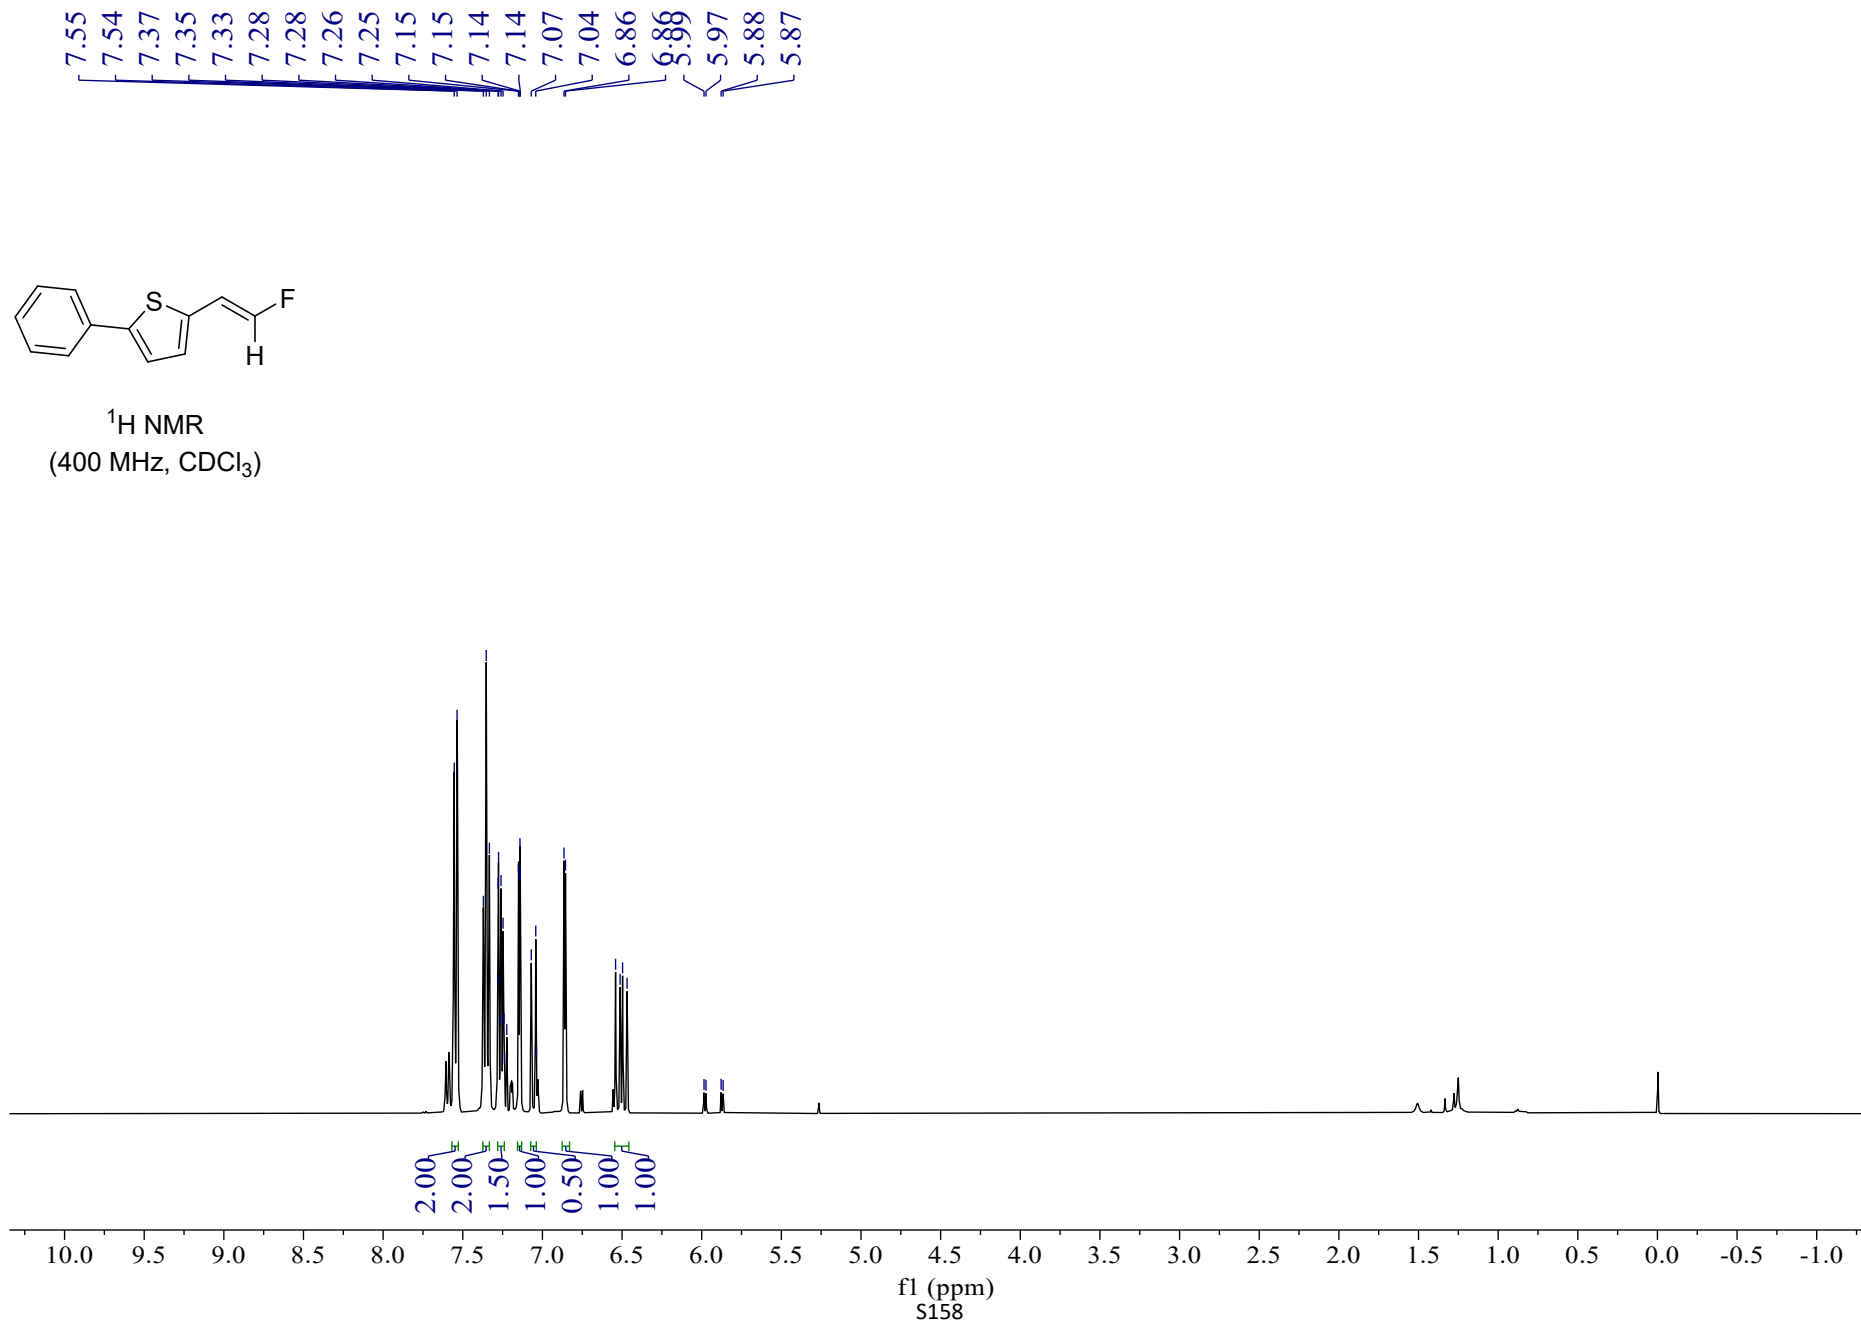

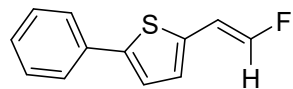

$^{13}\text{C}$  NMR  
(101 MHz,  $\text{CDCl}_3$ )

151.06  
148.45  
142.79  
142.75  
134.42  
134.31  
134.11  
129.06  
129.05  
127.76  
127.22  
127.16  
125.80  
123.37  
108.58  
108.38  
  
77.48  
77.16  
76.84

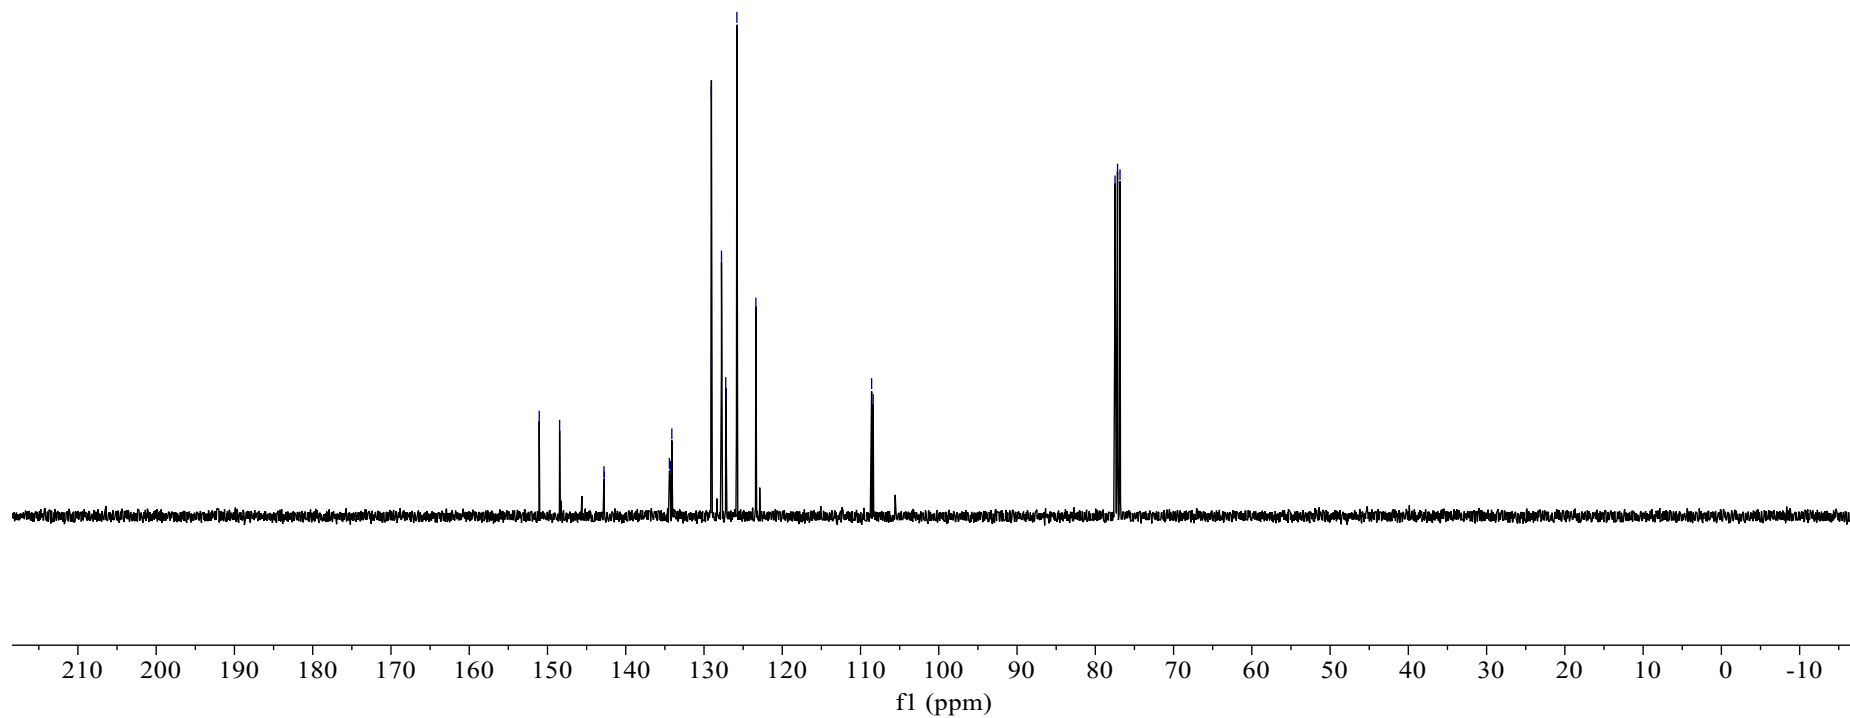

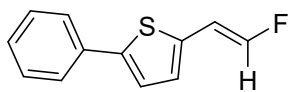

$^{19}\text{F}$  NMR  
(376 MHz,  $\text{CDCl}_3$ )

-120.21  
-120.33  
-120.43  
-120.54  
-128.91  
-128.96  
-129.13  
-129.18

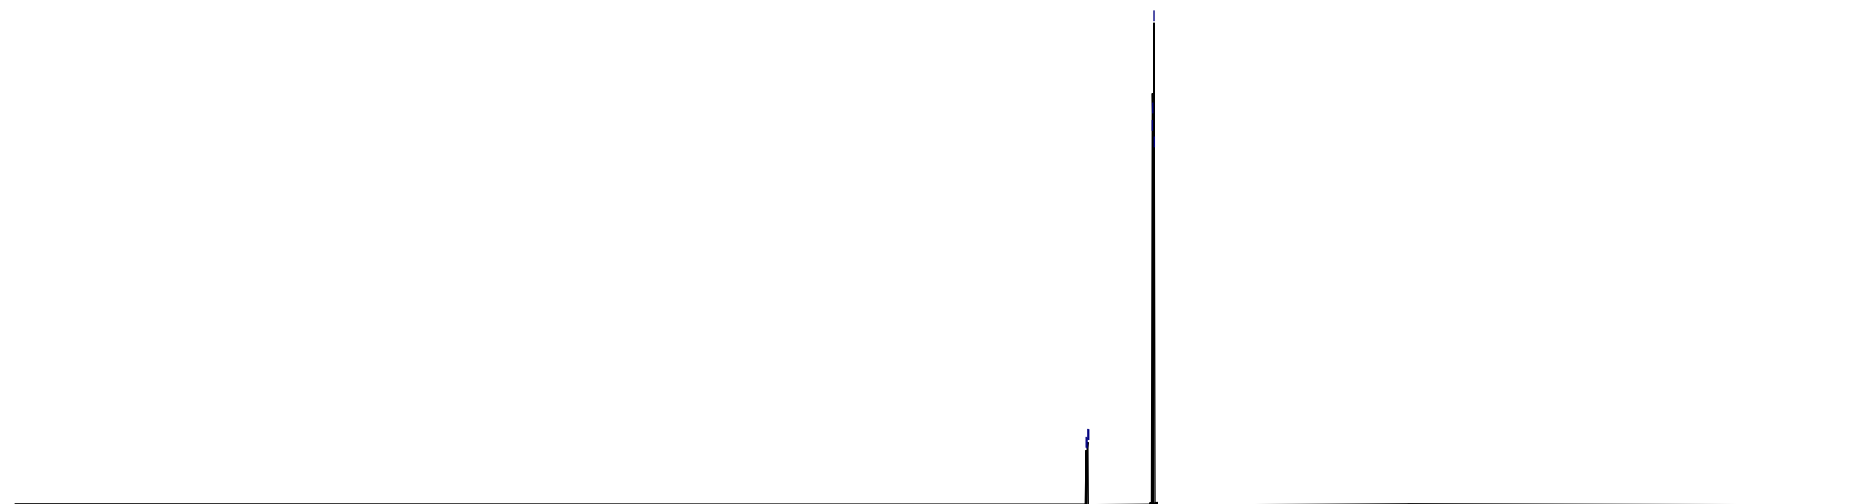

20 10 0 -10 -20 -30 -40 -50 -60 -70 -80 -90 -100 -110 -120 -130 -140 -150 -160 -170 -180 -190 -200 -210 -220

fl (ppm)

S160

# Mass Spectrum SmartFormula Report

## Analysis Info

Analysis Name D:\LXMS\0106\_RB7\_01\_20516.d  
Method LC\_NO UV\_P50-1500\_6MIN.m  
Sample Name 0106

Acquisition D 2023-01-09 10:17:12

Operator Demo User

Instrument compact 8255754.2017  
6

## Comment

## Acquisition Paramet

|             |            |               |          |                |           |
|-------------|------------|---------------|----------|----------------|-----------|
| Source Type | ESI        | Ion Polarity  | Positive | Set Nebulizer  | 3.0 Bar   |
| Focus       | Not active | Set Capillary | 4000 V   | Set Dry Heater | 200 °C    |
| Scan Begin  | 50 m/z     | Set End Plate | -500 V   | Set Dry Gas    | 8.0 l/min |

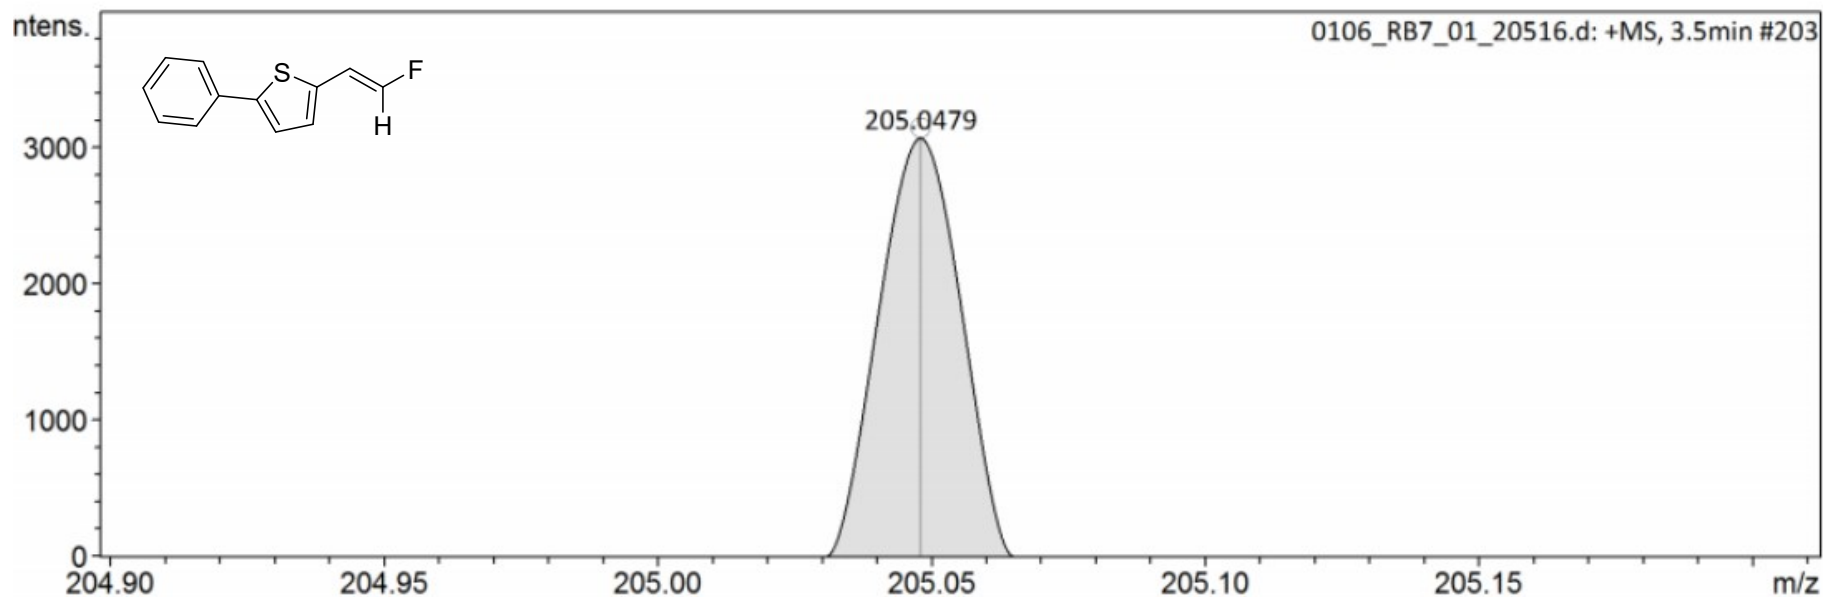

| Meas. m/z | # | Ion Formula | m/z      | err [ppm] | mSigma | # | mSigma | Score  | rdb | e;¥  | Conf | N-Rule |
|-----------|---|-------------|----------|-----------|--------|---|--------|--------|-----|------|------|--------|
| 205.0479  | 1 | C12H10FS    | 205.0482 | 1.3       | n.a.   | 1 | 1      | 100.00 | 7.5 | even |      | ok     |

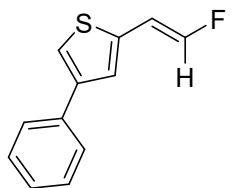

$^1\text{H}$  NMR  
(600 MHz,  $\text{CDCl}_3$ )

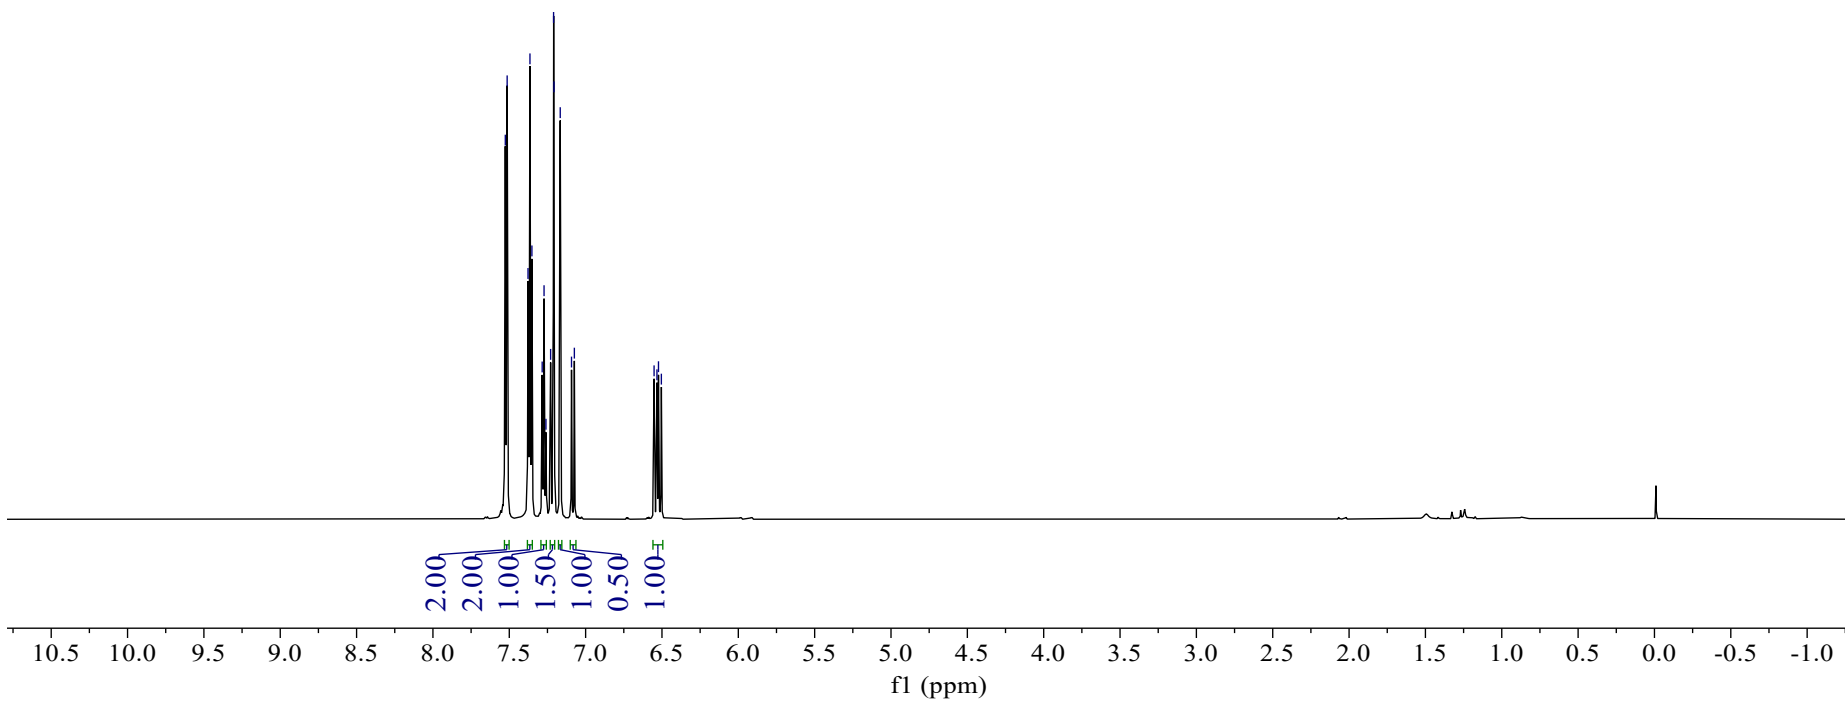

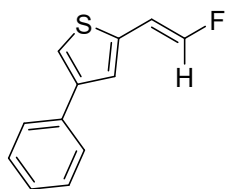

<sup>13</sup>C NMR  
(151 MHz, CDCl<sub>3</sub>)

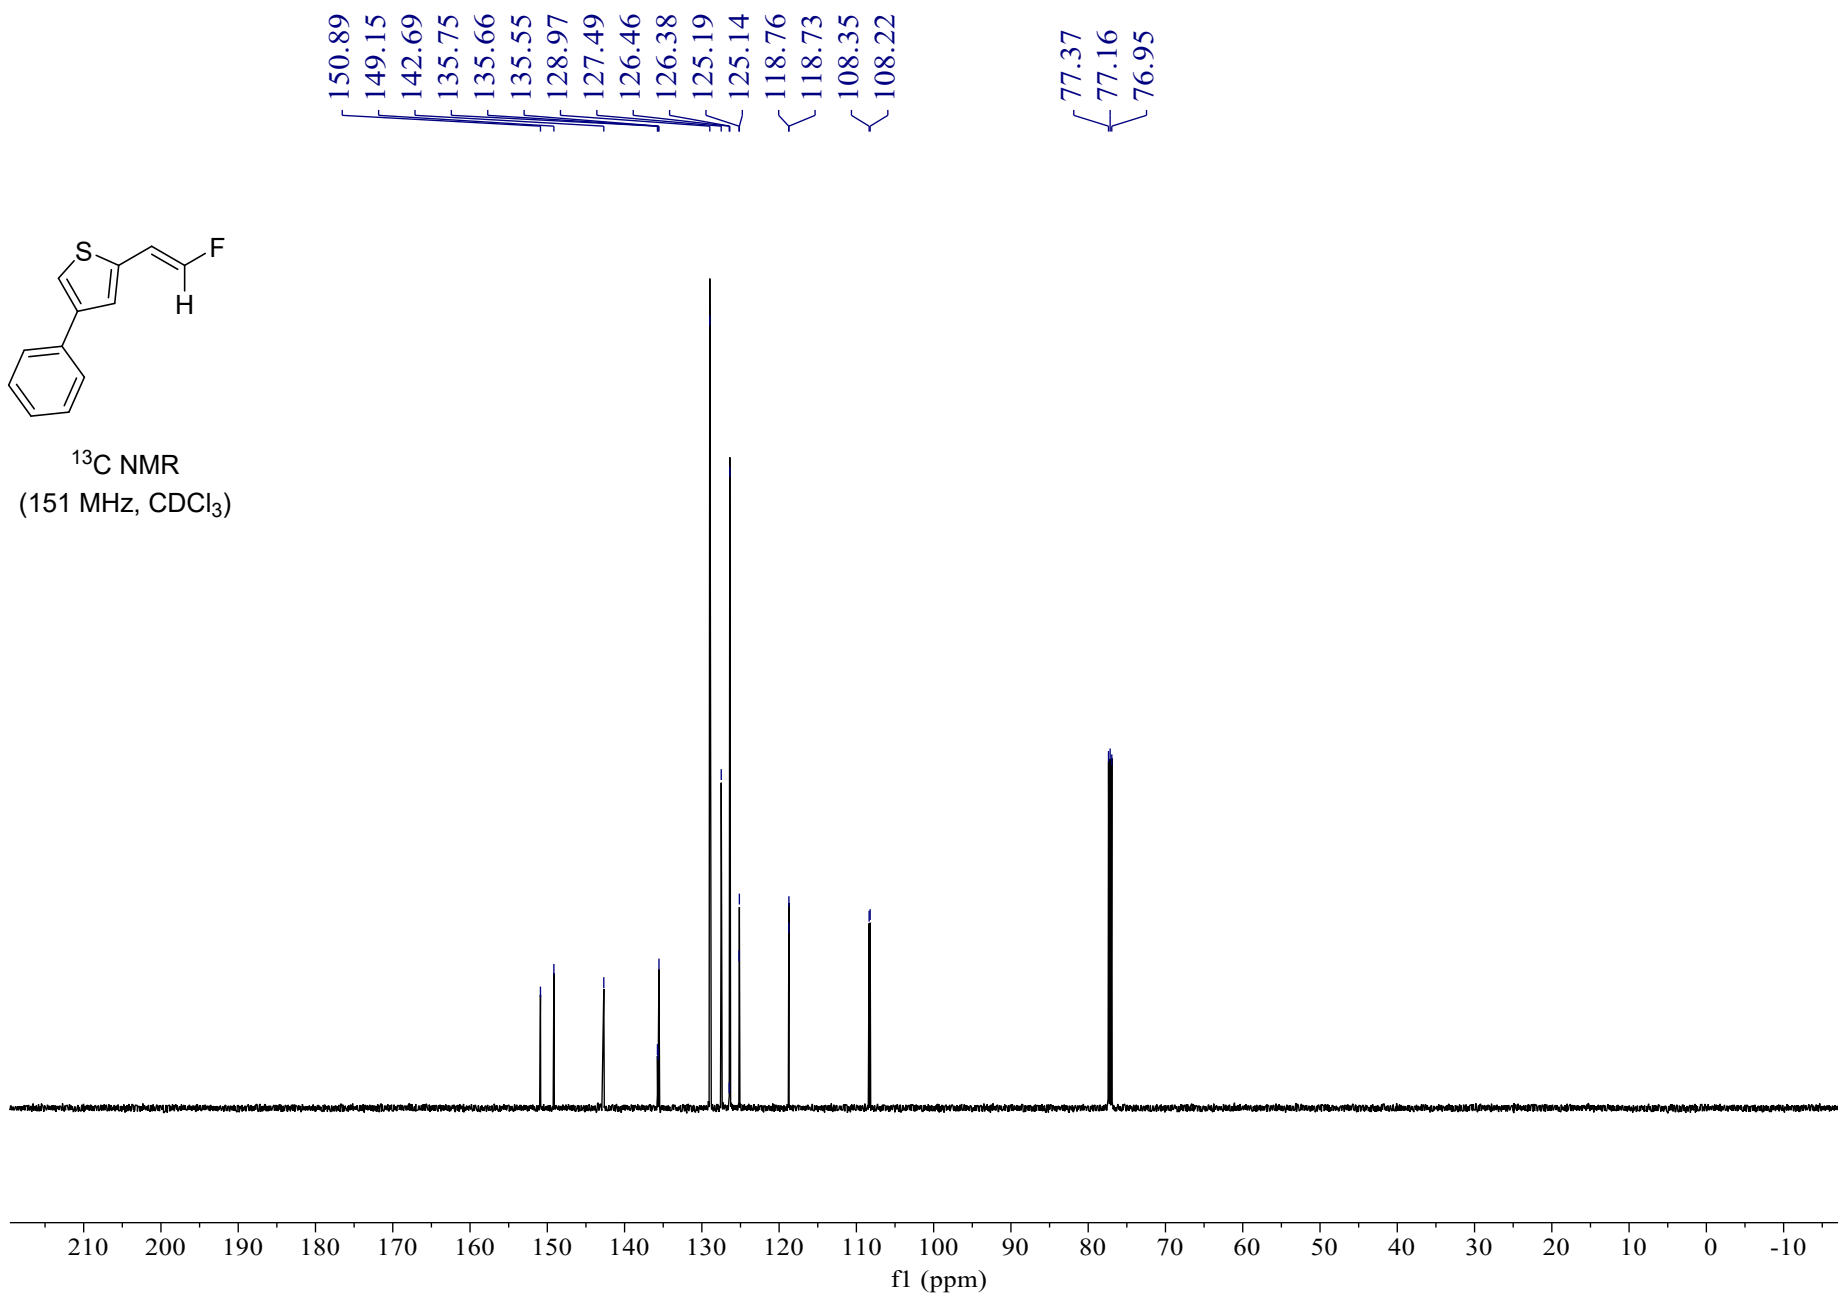

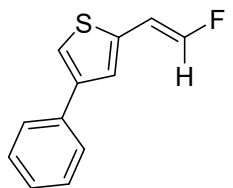

<sup>19</sup>F NMR  
(565 MHz, CDCl<sub>3</sub>)

-120.19  
-120.26  
-120.33  
-120.41  
-128.52  
-128.55  
-128.66  
-128.69

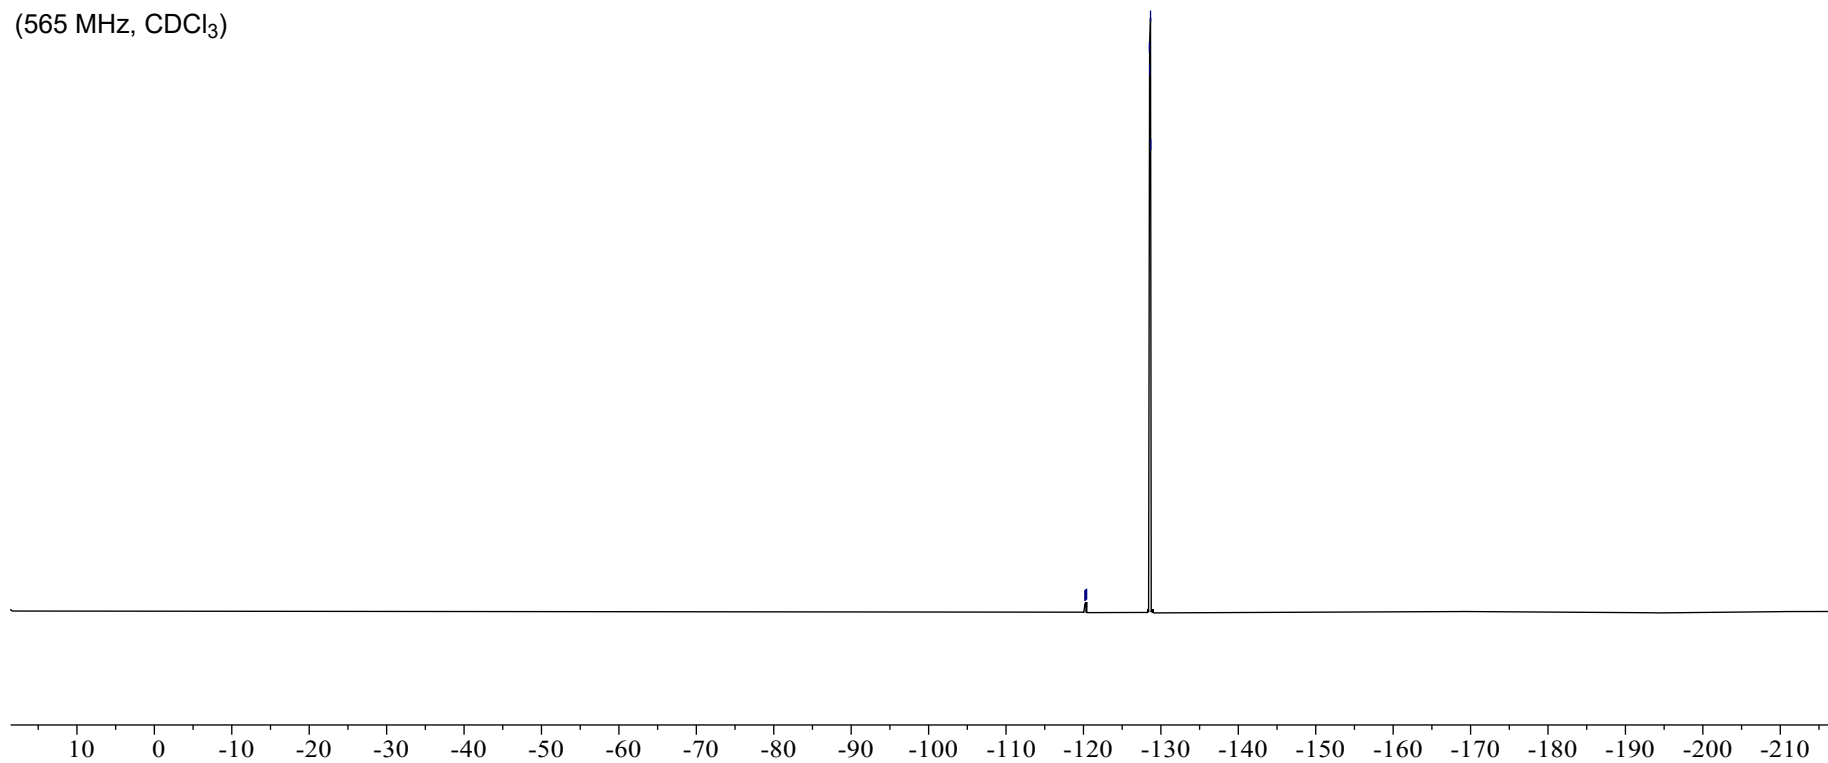



# Mass Spectrum SmartFormula Report

## Analysis Info

Analysis Name D:\LXMS\0106\_RD1\_01\_20526.d  
Method LC\_NO UV\_P50-1500\_6MIN.m  
Sample Name 0106

Acquisition D 2023-01-09 11:33:39

Operator Demo User

Instrument compact 8255754.2017  
6

## Comment

## Acquisition Paramet

|             |            |               |          |                |           |
|-------------|------------|---------------|----------|----------------|-----------|
| Source Type | ESI        | Ion Polarity  | Positive | Set Nebulizer  | 3.0 Bar   |
| Focus       | Not active | Set Capillary | 4000 V   | Set Dry Heater | 200 °C    |
| Scan Begin  | 50 m/z     | Set End Plate | -500 V   | Set Dry Gas    | 8.0 l/min |

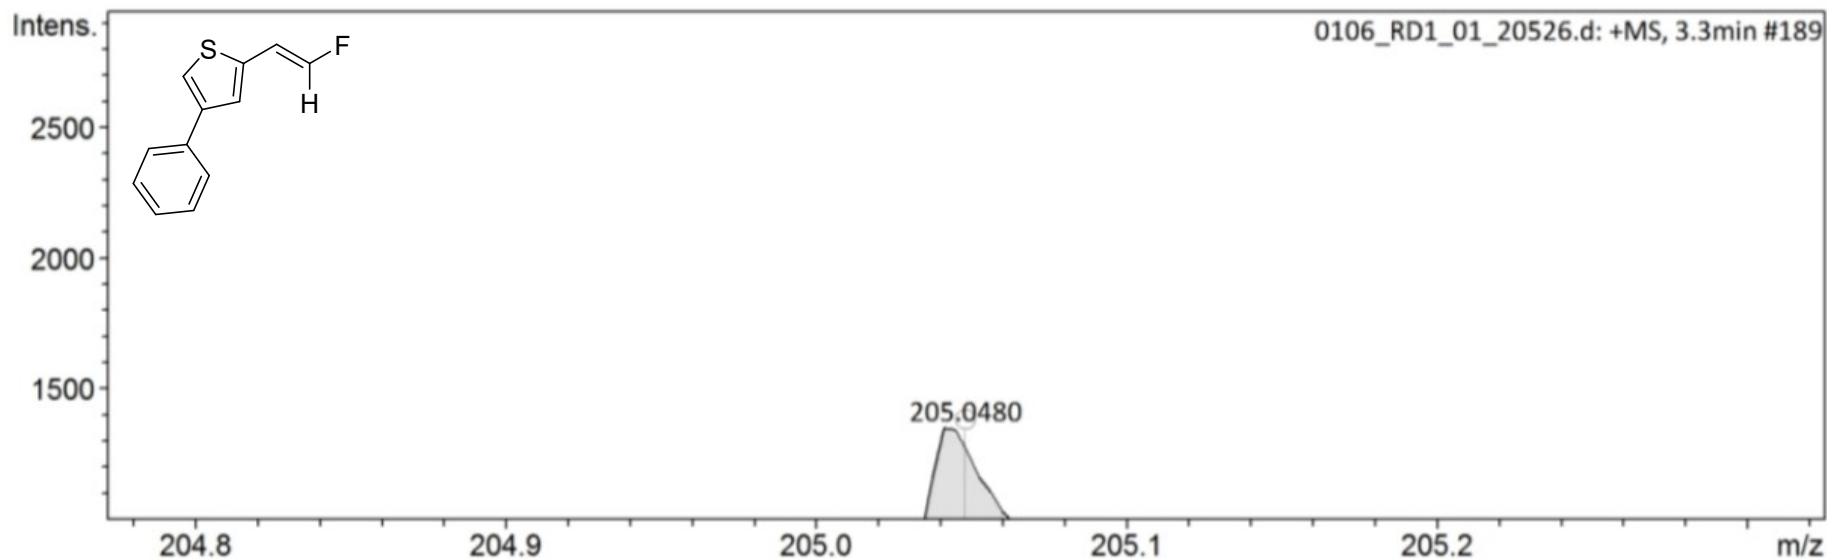

| Meas. m/z | # | Ion Formula | m/z      | err [ppm] | mSigma | # | mSigma | Score | rdb  | e;Y | Conf | N-Rule |
|-----------|---|-------------|----------|-----------|--------|---|--------|-------|------|-----|------|--------|
| 205.0480  | 1 | C12H10FS    | 205.0482 | 0.9       | 268.1  | 1 | 100.00 | 7.5   | even |     |      | ok     |

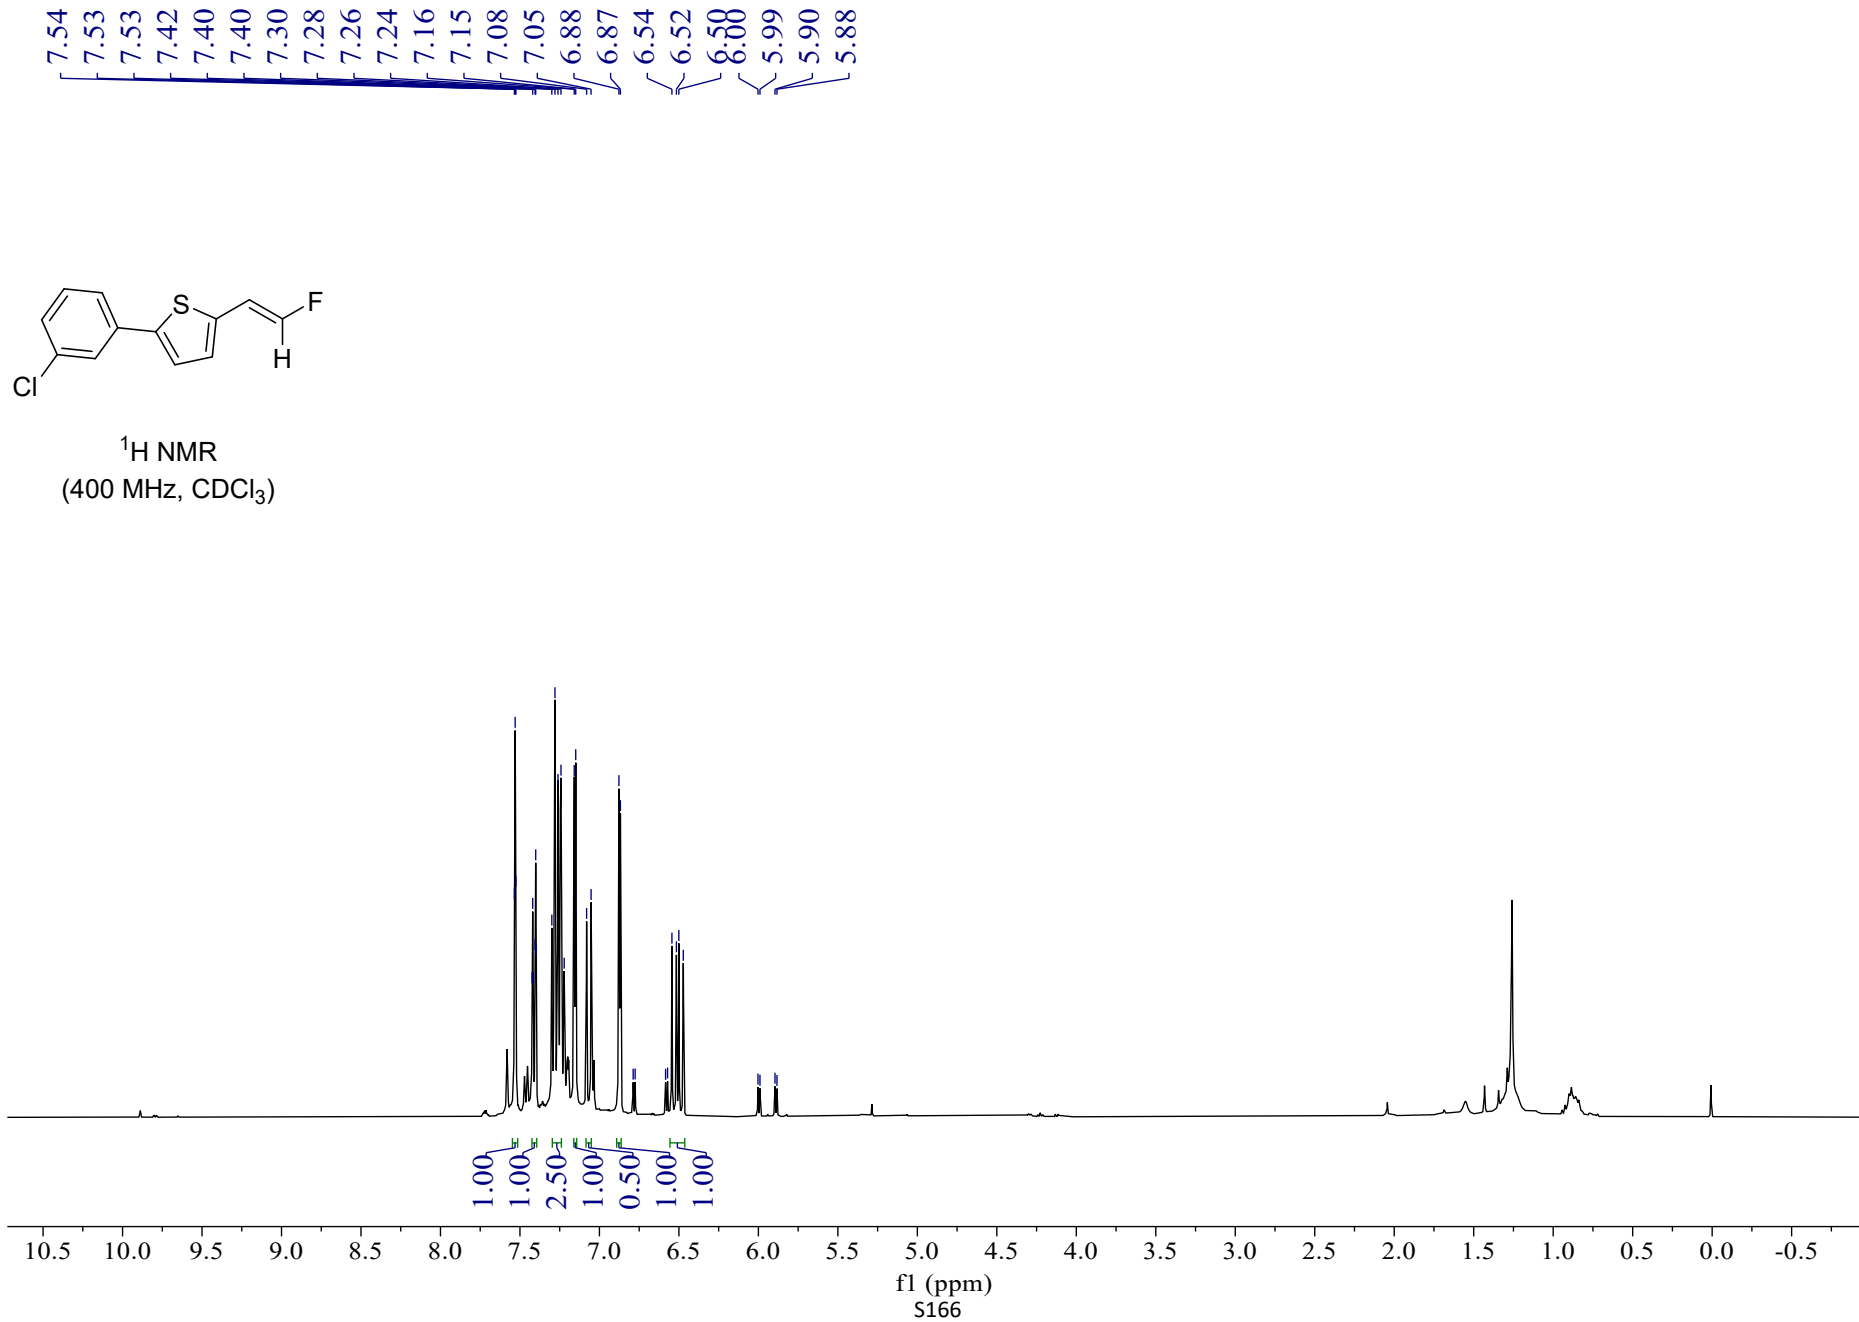

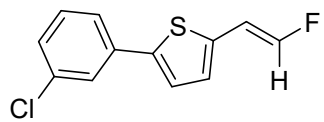

<sup>13</sup>C NMR  
(151 MHz, CD<sub>2</sub>Cl<sub>2</sub>)

151.29  
149.56  
141.18  
136.13  
135.55  
135.47  
135.15  
130.67  
127.88  
127.66  
127.61  
125.84  
124.62  
124.20  
108.61  
108.48

54.20  
54.02  
53.84  
53.66  
53.48

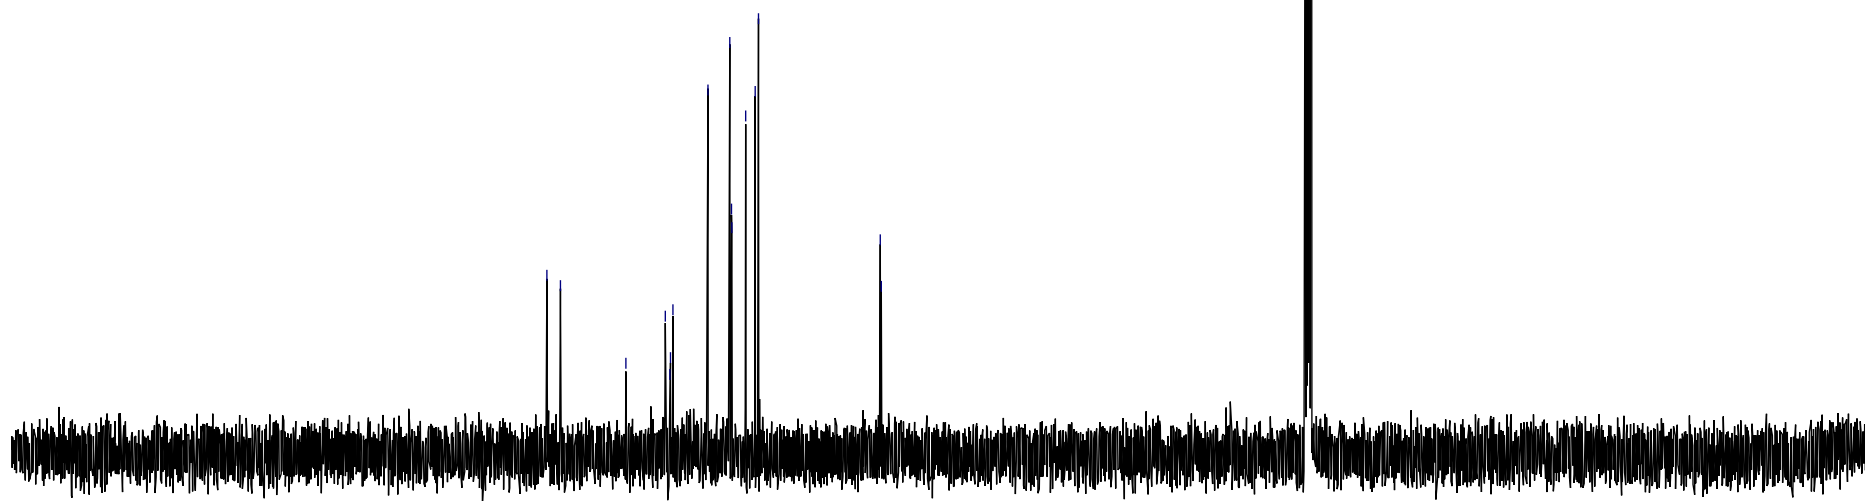

210 200 190 180 170 160 150 140 130 120 110 100 90 80 70 60 50 40 30 20 10 0 -10

f1 (ppm)  
S167

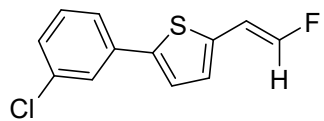

<sup>19</sup>F NMR  
(376 MHz, CDCl<sub>3</sub>)

-119.35  
-119.46  
-119.56  
-119.68  
-127.94  
-127.99  
-128.16  
-128.21

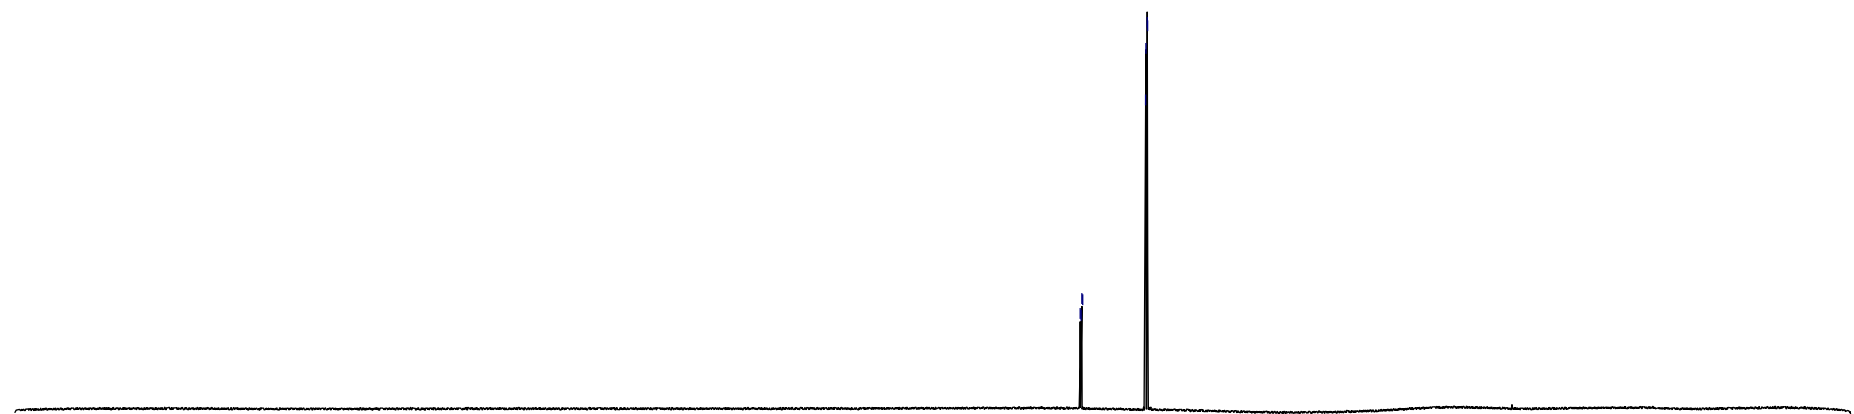

20 10 0 -10 -20 -30 -40 -50 -60 -70 -80 -90 -100 -110 -120 -130 -140 -150 -160 -170 -180 -190 -200 -210 -220

f1 (ppm)

S168

# Mass Spectrum SmartFormula Report

## Analysis Info

Analysis Name D:\LXMS\0106\_RB6\_01\_20515.d  
Method LC\_NO UV\_P50-1500\_6MIN.m  
Sample Name 0106

Acquisition D 2023-01-09 10:09:36

Operator Demo User  
Instrument compact 8255754.2017  
6

## Comment

## Acquisition Paramet

|             |            |               |          |                |           |
|-------------|------------|---------------|----------|----------------|-----------|
| Source Type | ESI        | Ion Polarity  | Positive | Set Nebulizer  | 3.0 Bar   |
| Focus       | Not active | Set Capillary | 4000 V   | Set Dry Heater | 200 °C    |
| Scan Begin  | 50 m/z     | Set End Plate | -500 V   | Set Dry Gas    | 8.0 l/min |

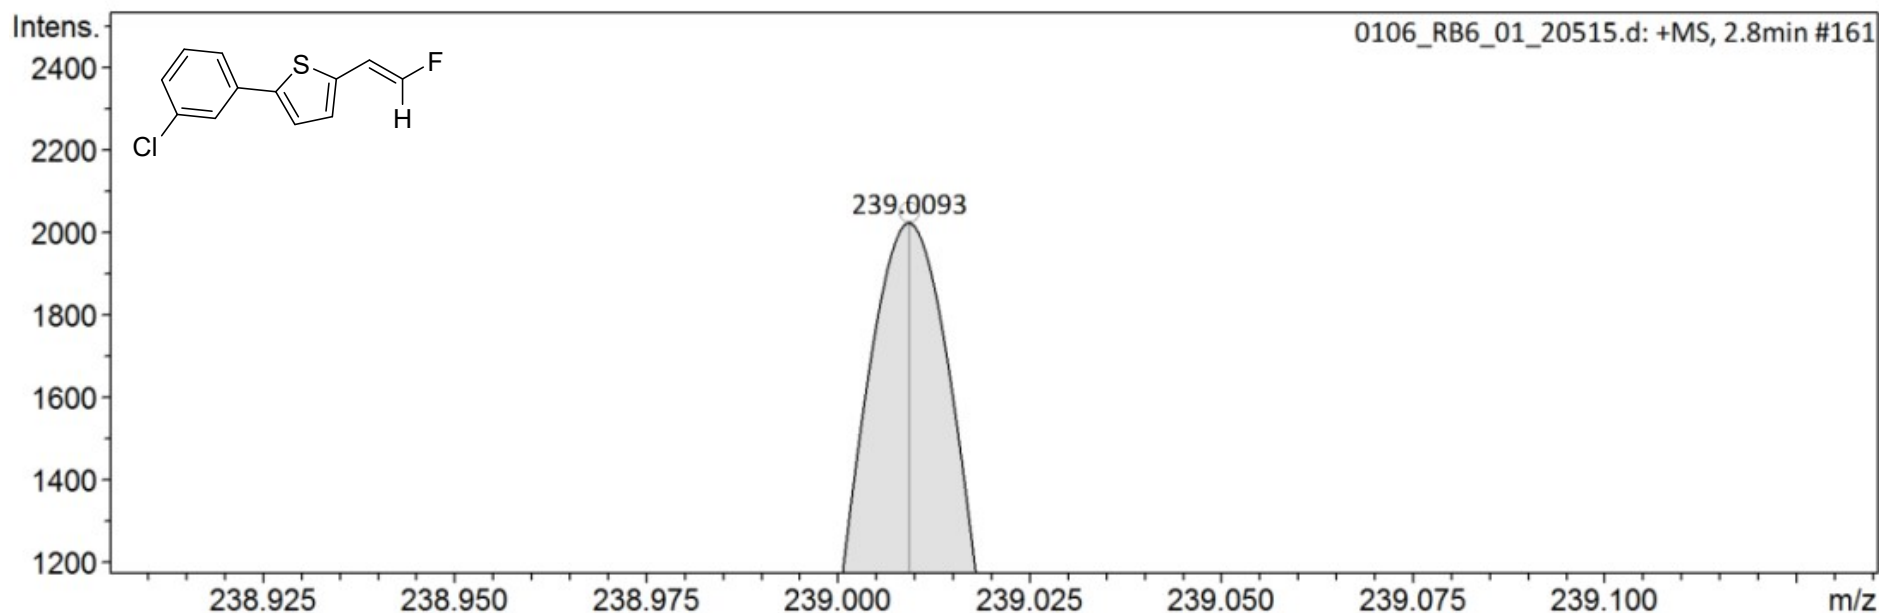

| Meas. m/z | # | Ion Formula | m/z      | err [ppm] | mSigma | # | mSigma | Score | rdb  | e;¥ | Conf | N-Rule |
|-----------|---|-------------|----------|-----------|--------|---|--------|-------|------|-----|------|--------|
| 239.0093  | 1 | C12H9ClFS   | 239.0092 | -0.5      | n.a.   | 1 | 100.00 | 7.5   | even |     |      | ok     |

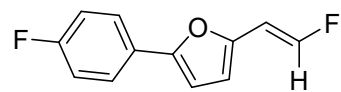

<sup>1</sup>H NMR  
(600 MHz, CDCl<sub>3</sub>)

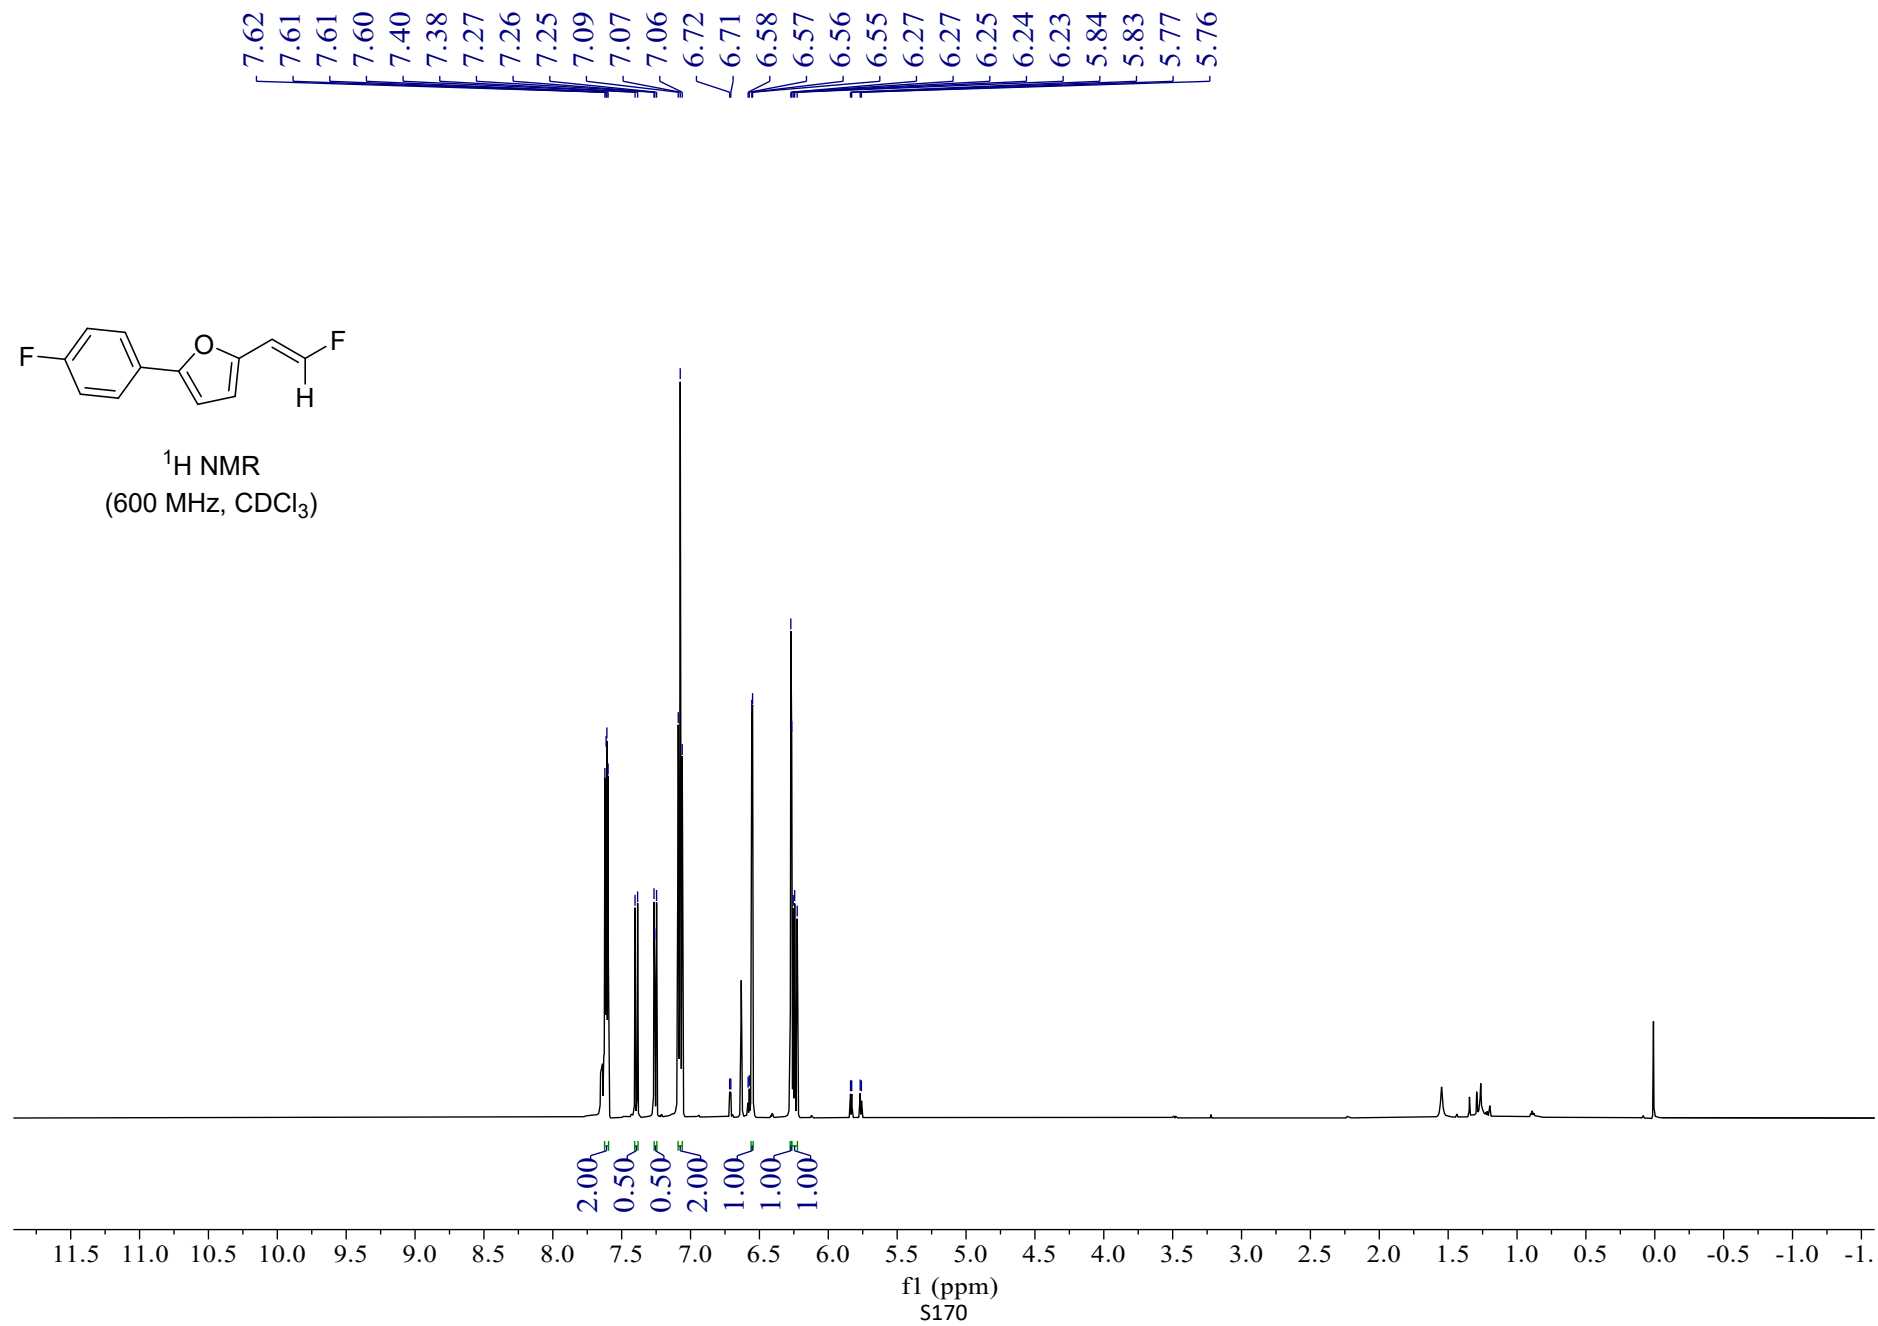

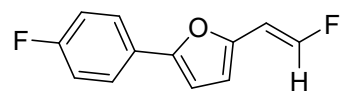

$^{13}\text{C}$  NMR  
(151 MHz,  $\text{CDCl}_3$ )

163.18  
161.54  
152.46  
152.44  
151.19  
149.46  
147.48  
147.39  
126.98  
126.96  
125.61  
125.56  
115.98  
115.83  
110.60  
110.54  
106.45  
104.24  
104.11  
77.37  
77.16  
76.95

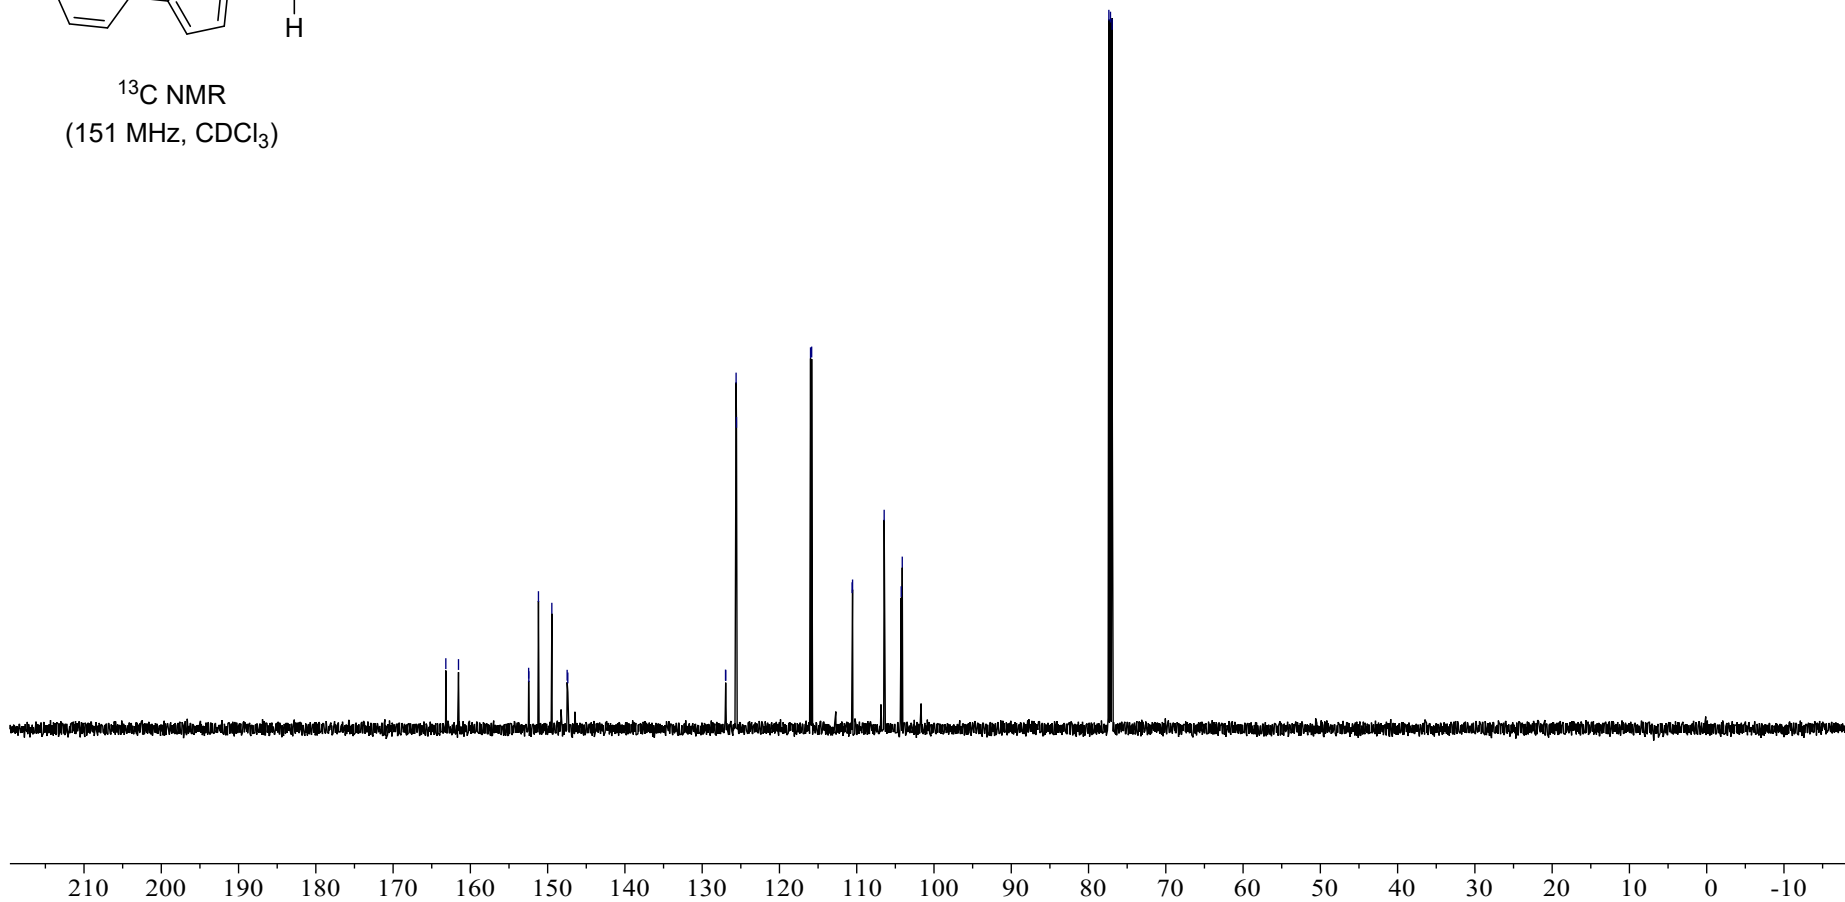

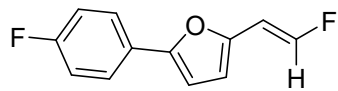

<sup>19</sup>F NMR  
(376 MHz, CDCl<sub>3</sub>)

-113.88  
-113.90  
-113.91  
-113.92  
-113.93  
-114.03  
-114.04  
-114.05  
-114.06  
-114.08  
-119.65  
-119.73  
-119.80  
-119.87  
-130.62  
-130.65  
-130.77  
-130.80

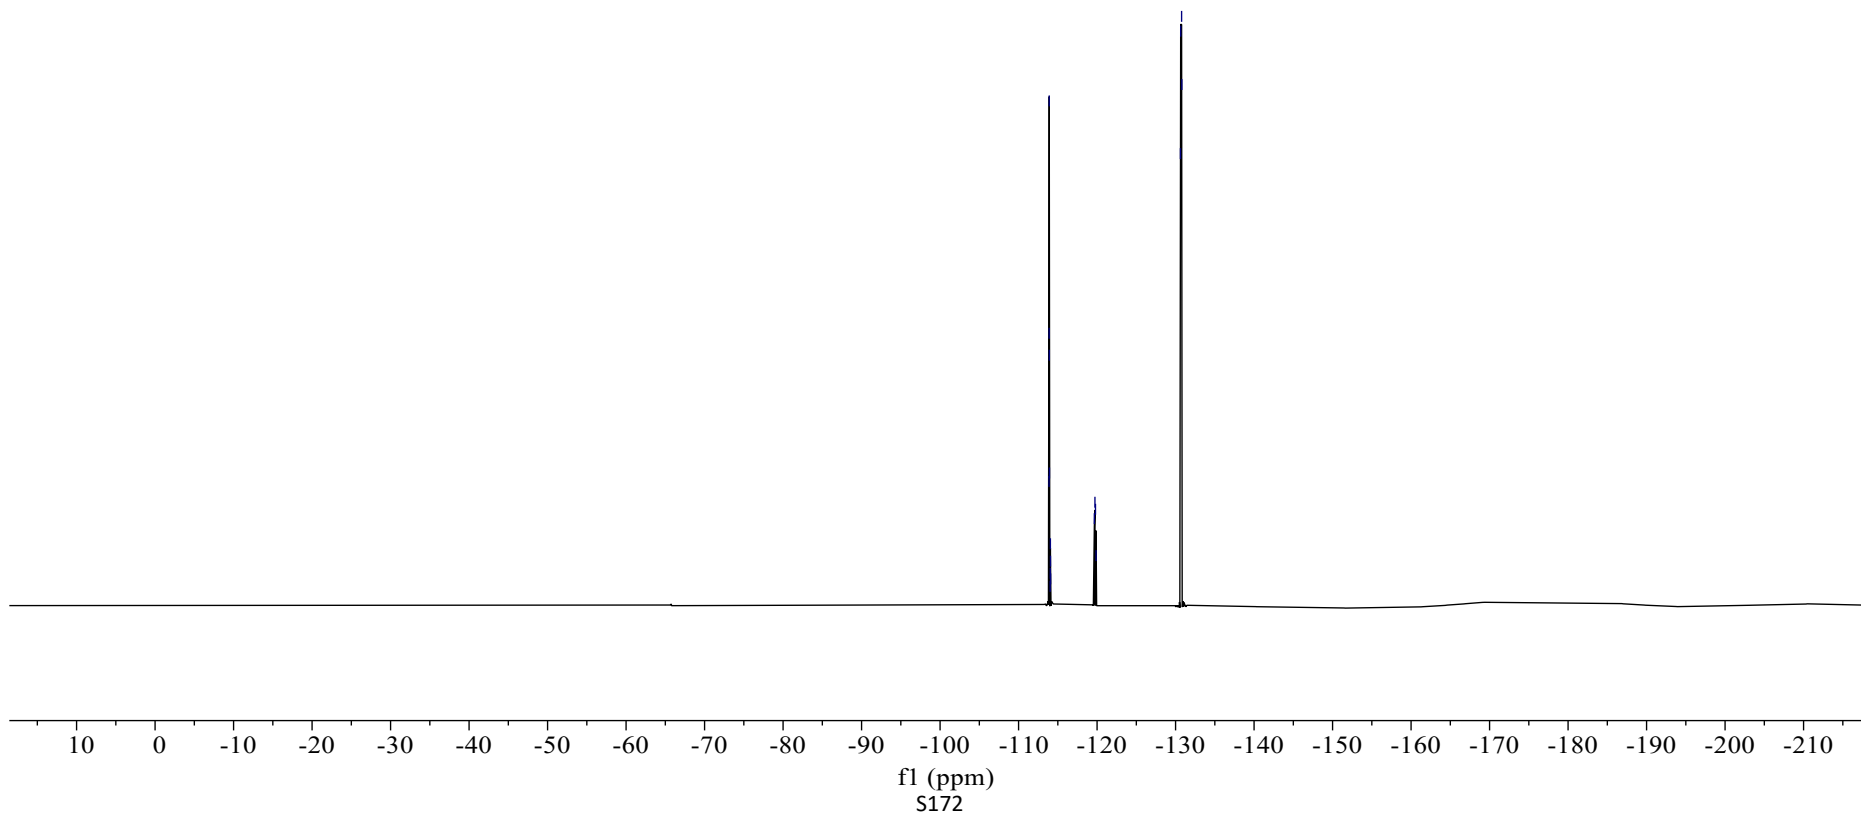



# Mass Spectrum SmartFormula Report

## Analysis Info

Analysis Name D:\LXMS\0106\_RB8\_01\_20517.d  
Method LC\_NO UV\_P50-1500\_6MIN.m  
Sample Name 0106

Acquisition D 2023-01-09 10:25:01

Operator Demo User  
Instrument compact 8255754.2017  
6

## Comment

## Acquisition Paramet

|             |            |               |          |                |           |
|-------------|------------|---------------|----------|----------------|-----------|
| Source Type | ESI        | Ion Polarity  | Positive | Set Nebulizer  | 3.0 Bar   |
| Focus       | Not active | Set Capillary | 4000 V   | Set Dry Heater | 200 °C    |
| Scan Begin  | 50 m/z     | Set End Plate | -500 V   | Set Dry Gas    | 8.0 l/min |

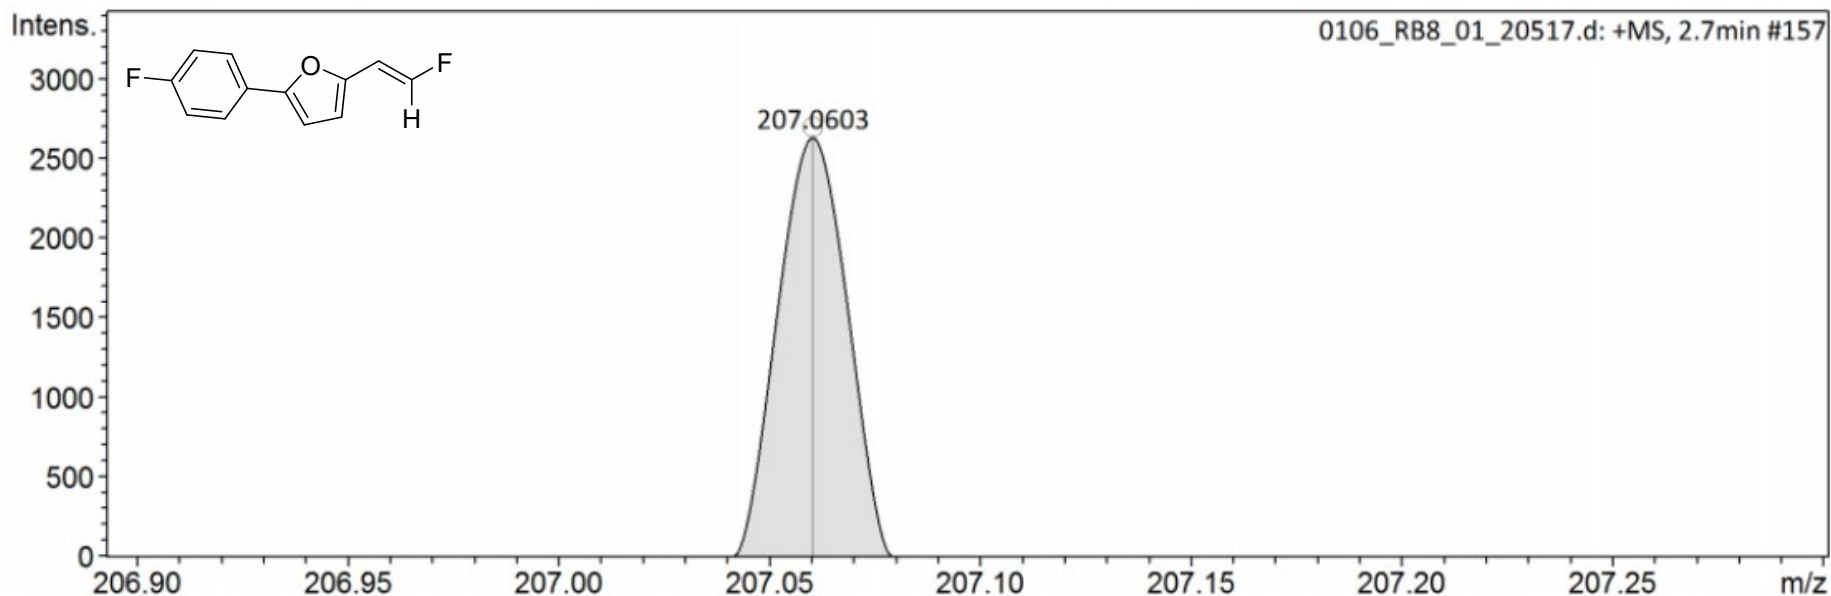

| Meas. m/z | # | Ion Formula | m/z      | err [ppm] | mSigma | # | mSigma | Score  | rdb | e;Y  | Conf | N-Rule |
|-----------|---|-------------|----------|-----------|--------|---|--------|--------|-----|------|------|--------|
| 207.0603  | 1 | C12H9F2O    | 207.0616 | 6.5       | 208.6  | 1 | 1      | 100.00 | 7.5 | even |      | ok     |

8.04  
7.93  
7.91  
7.90  
7.88  
7.87  
7.75  
7.73  
7.69  
7.68  
7.53  
7.52  
7.51  
7.51  
7.49  
7.48  
7.38  
7.37  
7.34  
7.32  
7.20  
7.18  
6.79  
6.78  
6.65  
6.64  
6.49  
6.47  
6.46  
6.44  
5.73  
5.73  
5.66  
5.65

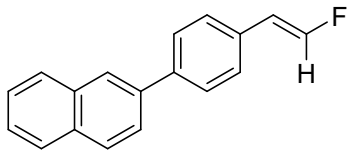

<sup>1</sup>H NMR  
(600 MHz, CDCl<sub>3</sub>)

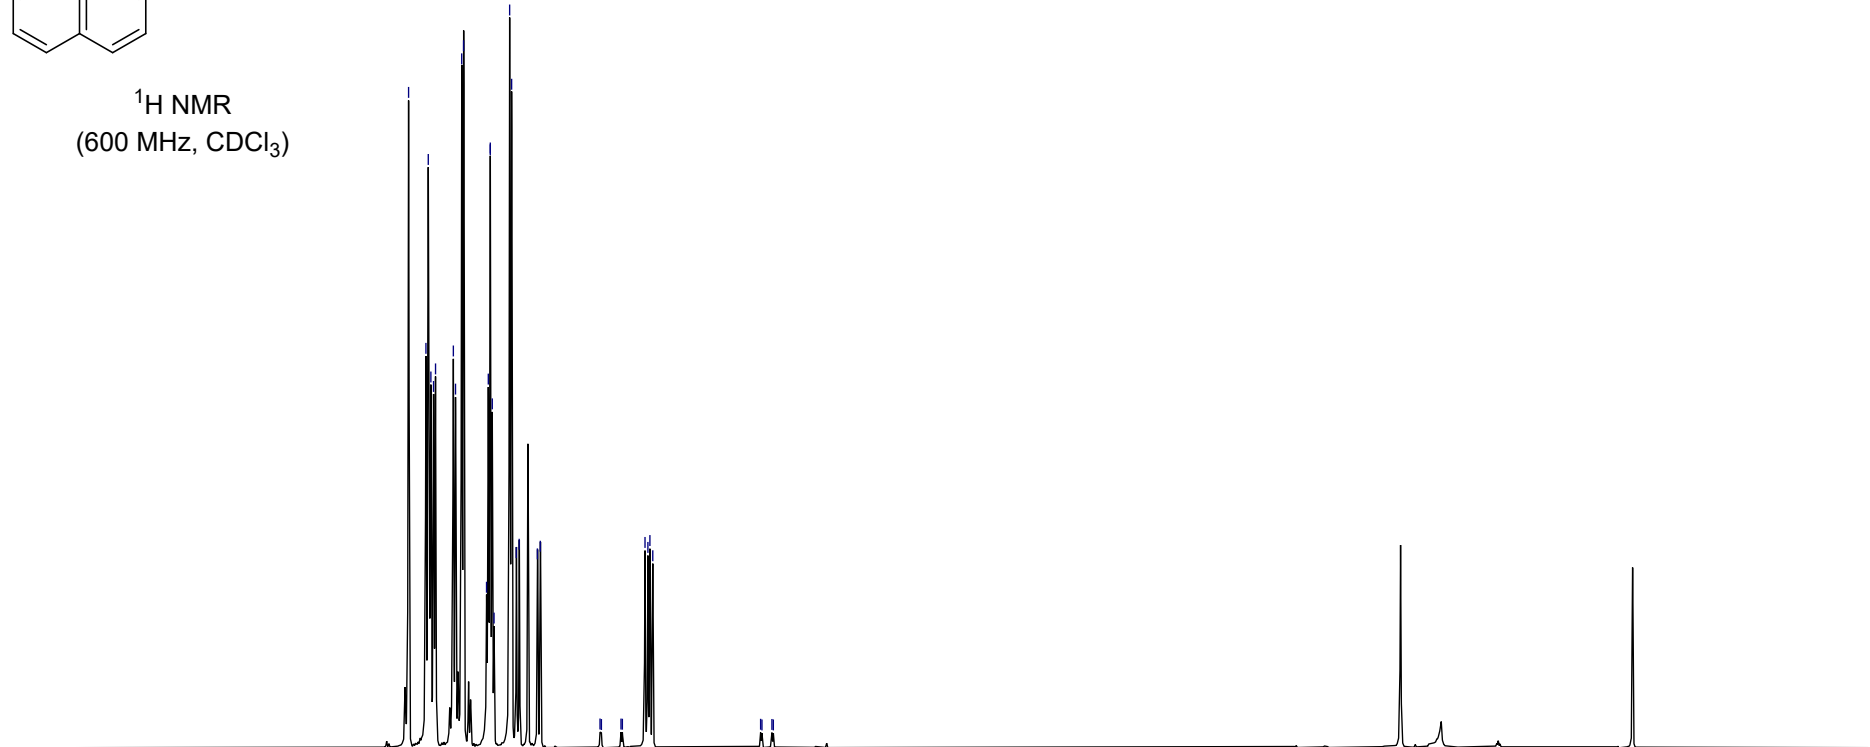

1.00  
2.00  
1.00  
1.00  
2.00  
2.00  
2.00  
0.50  
0.50  
1.00

10.5 10.0 9.5 9.0 8.5 8.0 7.5 7.0 6.5 6.0 5.5 5.0 4.5 4.0 3.5 3.0 2.5 2.0 1.5 1.0 0.5 0.0 -0.5 -1.0 -1  
f1 (ppm)  
S174

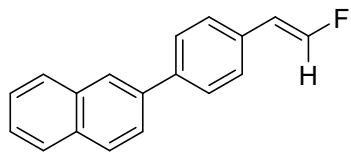

<sup>13</sup>C NMR  
(151 MHz, CDCl<sub>3</sub>)

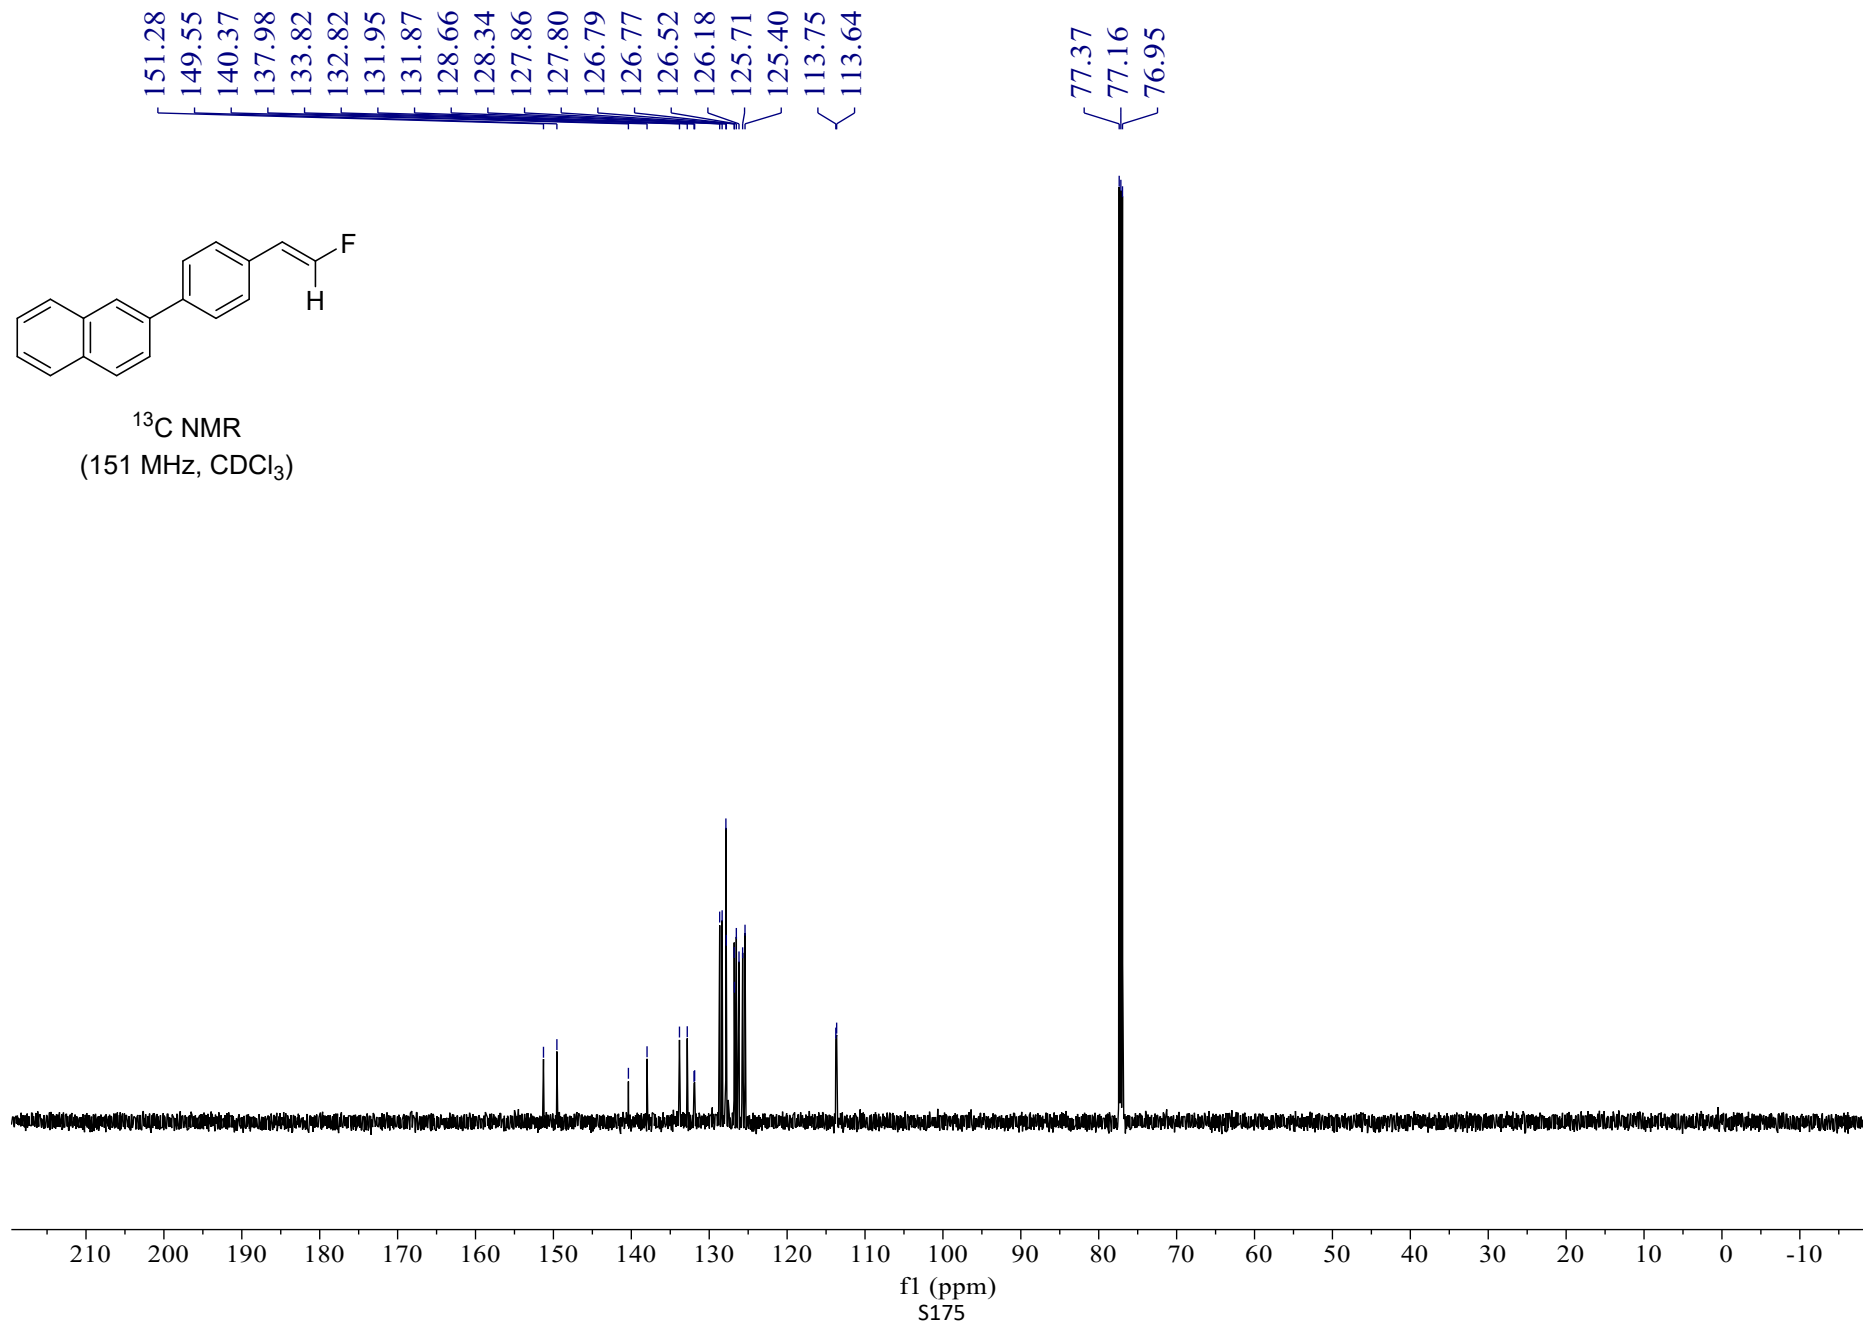

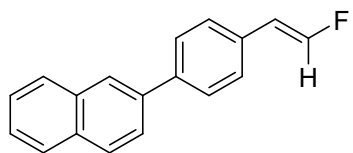

<sup>19</sup>F NMR  
(376 MHz, CDCl<sub>3</sub>)

-121.34  
-121.46  
-121.56  
-121.68  
-129.17  
-129.23  
-129.39  
-129.45

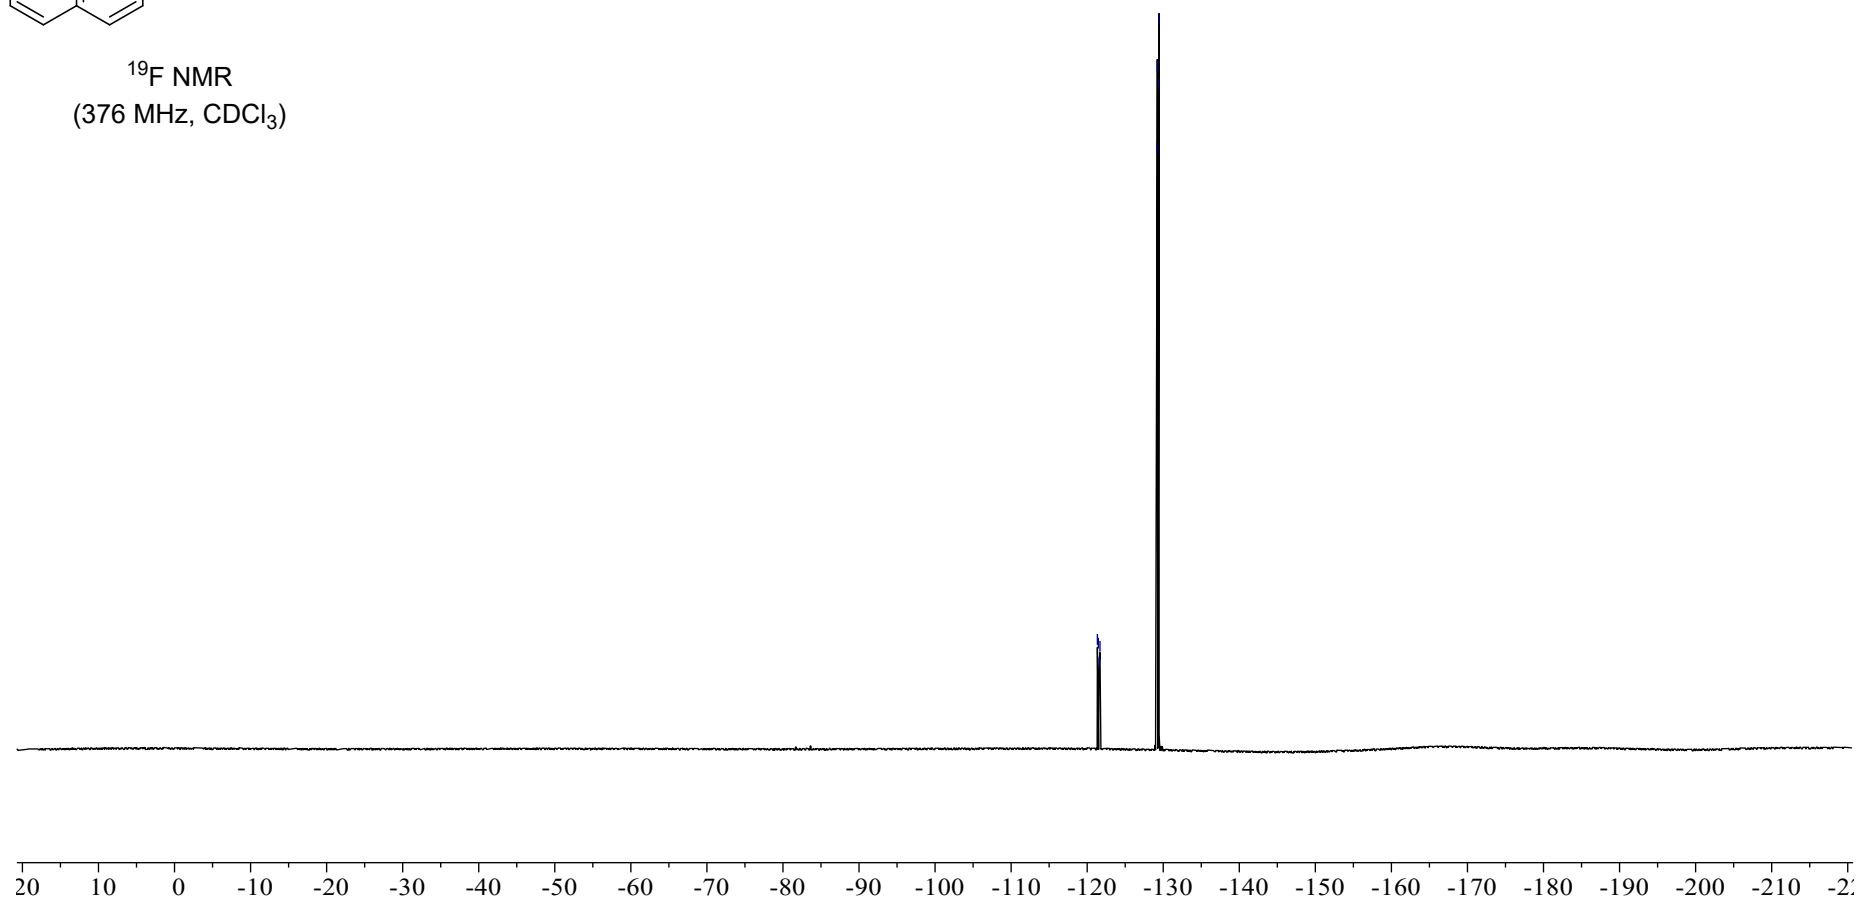

# Mass Spectrum SmartFormula Report

## Analysis Info

Analysis Name D:\LXMS\0106\_RB1\_01\_20510.d  
Method LC\_NO UV\_P50-1500\_6MIN.m  
Sample Name 0106

Acquisition D 2023-01-09 9:32:00  
Operator Demo User  
Instrument compact 8255754.2017  
6

## Comment

## Acquisition Paramet

|             |            |               |          |                |           |
|-------------|------------|---------------|----------|----------------|-----------|
| Source Type | ESI        | Ion Polarity  | Positive | Set Nebulizer  | 3.0 Bar   |
| Focus       | Not active | Set Capillary | 4000 V   | Set Dry Heater | 200 °C    |
| Scan Begin  | 50 m/z     | Set End Plate | -500 V   | Set Dry Gas    | 8.0 l/min |

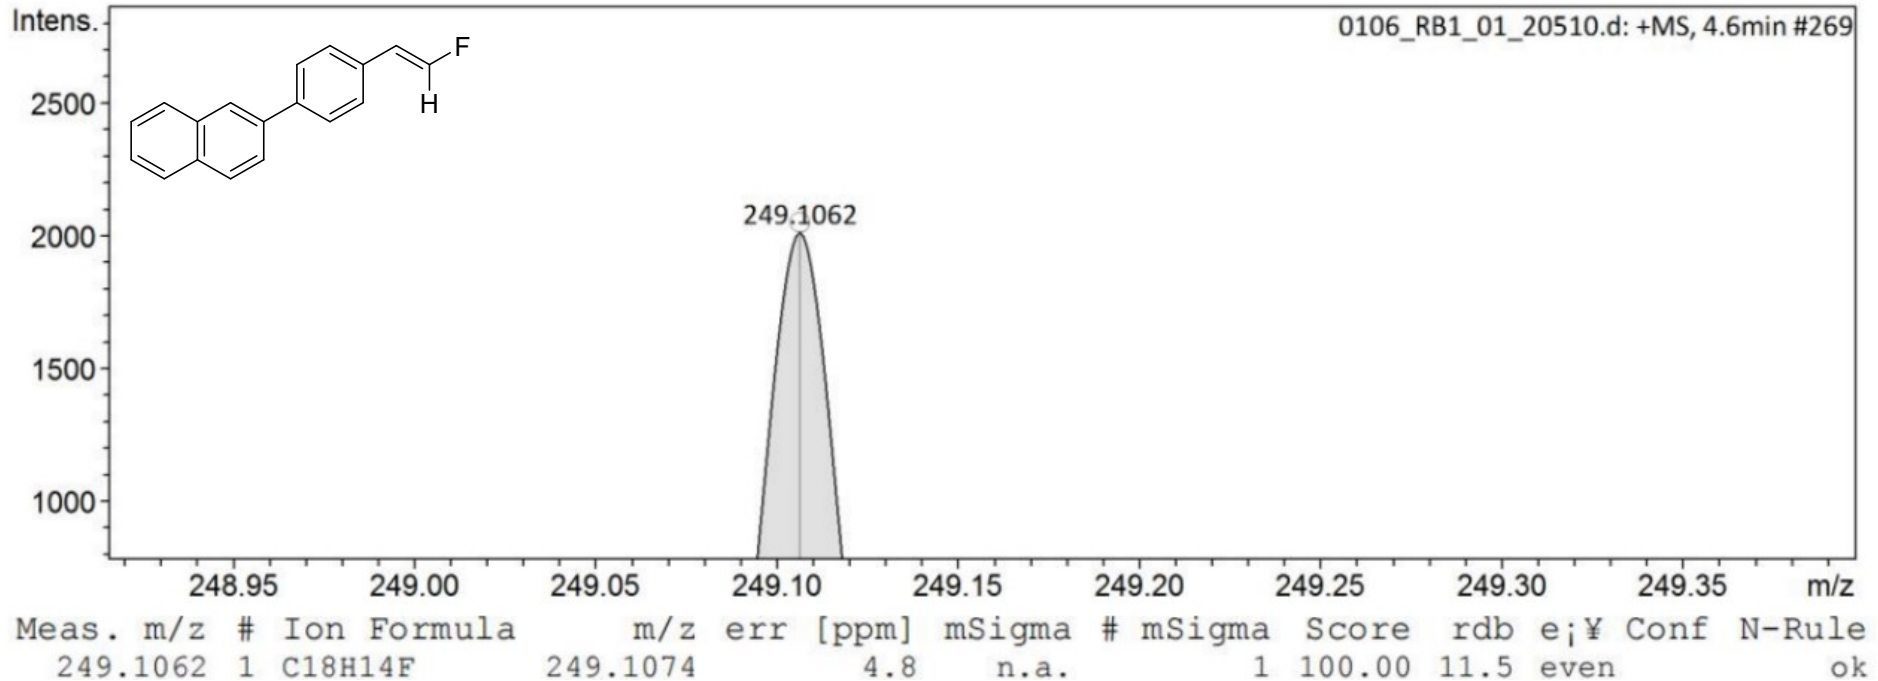

7.52  
7.51  
7.50  
7.43  
7.42  
7.42  
7.41  
7.40  
7.35  
7.34  
7.32  
7.32  
7.14  
7.12  
6.48  
6.45  
6.43  
6.40  
5.73  
5.72  
5.62  
5.61

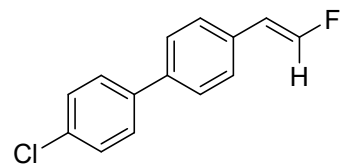

<sup>1</sup>H NMR  
(400 MHz, CDCl<sub>3</sub>)

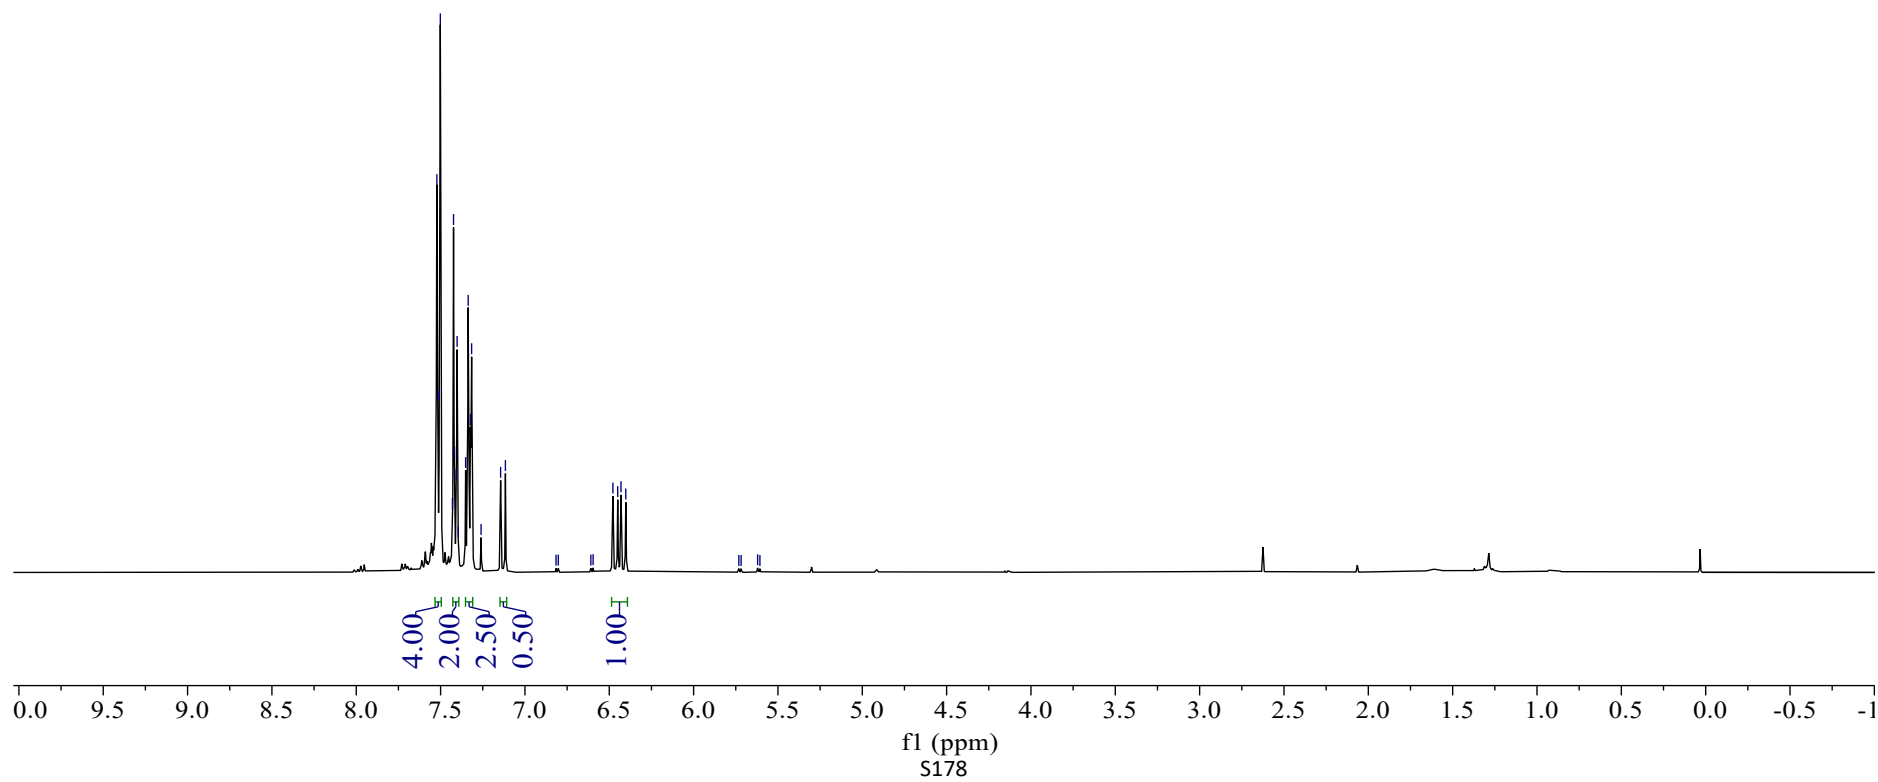

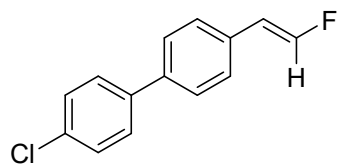

<sup>13</sup>C NMR  
(101 MHz, CDCl<sub>3</sub>)

151.76  
149.18  
139.16  
139.14  
139.07  
133.63  
132.23  
132.11  
129.10  
128.24  
127.40  
126.78  
126.75  
113.64  
113.48

77.48  
77.16  
76.84

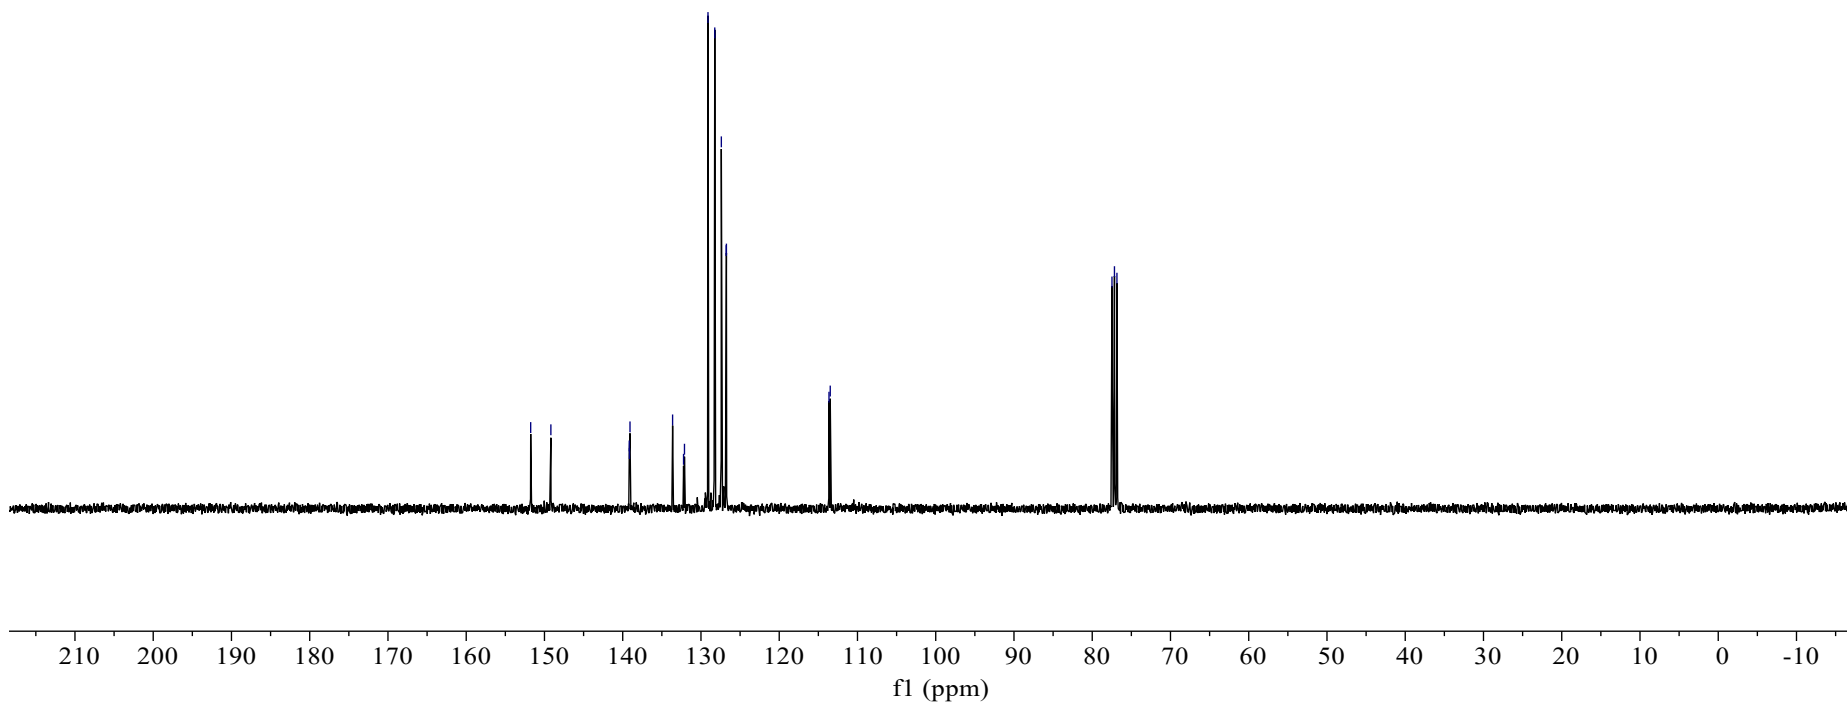

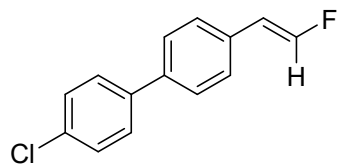

$^{19}\text{F}$  NMR  
(376 MHz,  $\text{CDCl}_3$ )

-121.09  
-121.21  
-121.31  
-121.43  
-128.79  
-128.84  
-129.01  
-129.06

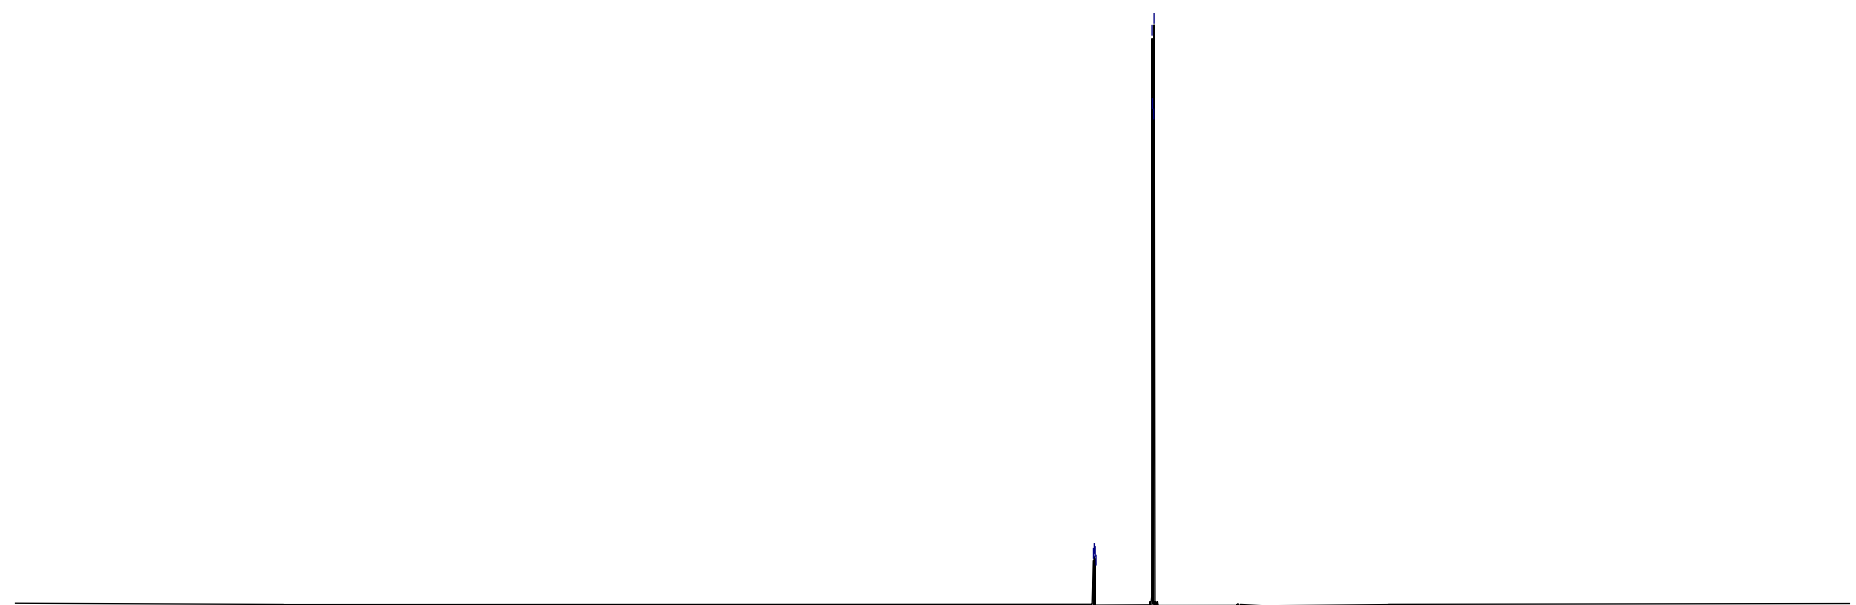

20 10 0 -10 -20 -30 -40 -50 -60 -70 -80 -90 -100 -110 -120 -130 -140 -150 -160 -170 -180 -190 -200 -210 -220

f1 (ppm)

S180



# Mass Spectrum SmartFormula Report

## Analysis Info

Analysis Name D:\LXMS\0106\_RA6\_01\_20507.d  
Method LC\_NO UV\_P50-1500\_6MIN.m  
Sample Name 0106

Acquisition D 2023-01-09 9:09:44

Operator Demo User

Instrument compact 8255754.2017  
6

## Comment

## Acquisition Paramet

|             |            |               |          |                |           |
|-------------|------------|---------------|----------|----------------|-----------|
| Source Type | ESI        | Ion Polarity  | Positive | Set Nebulizer  | 3.0 Bar   |
| Focus       | Not active | Set Capillary | 4000 V   | Set Dry Heater | 200 °C    |
| Scan Begin  | 50 m/z     | Set End Plate | -500 V   | Set Dry Gas    | 8.0 l/min |

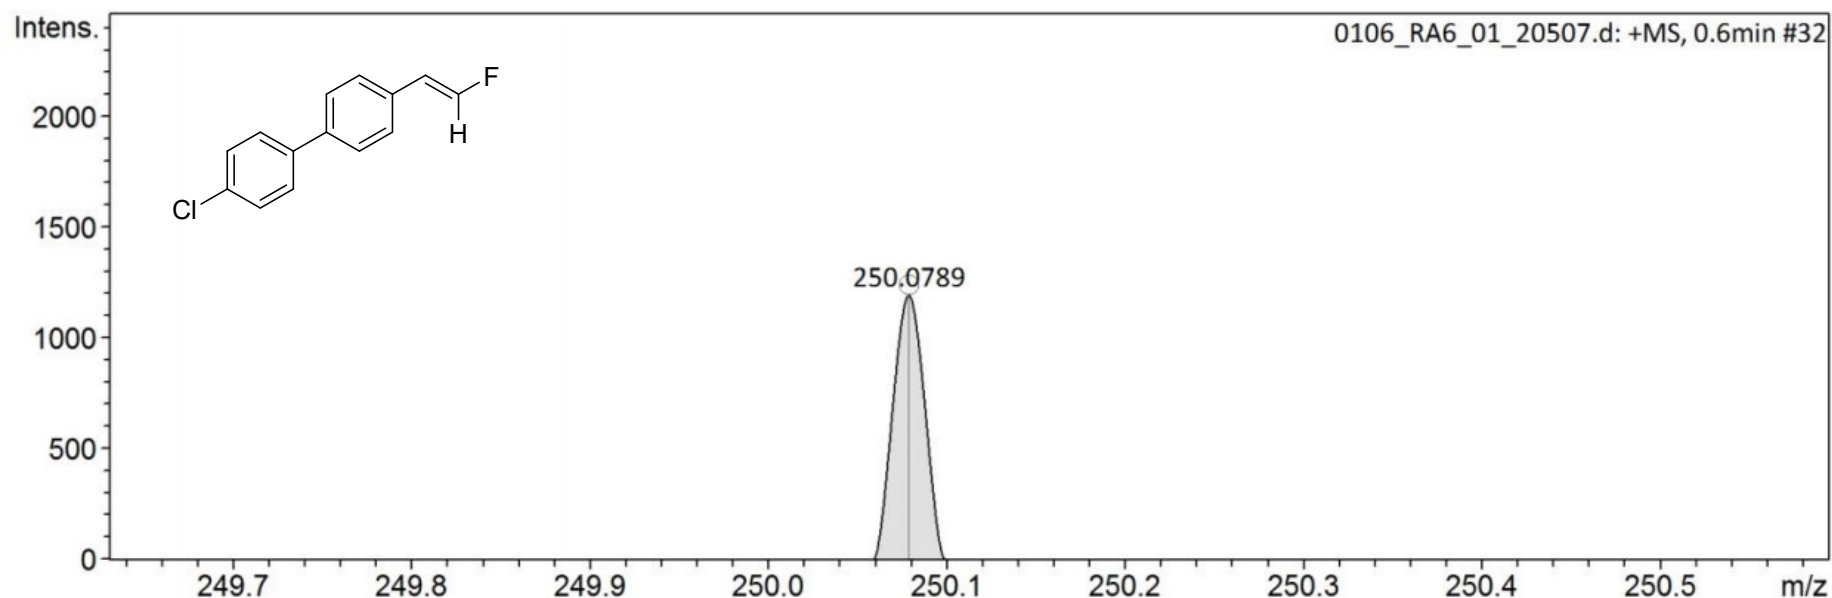

| Meas. m/z | # | Ion Formula | m/z      | err [ppm] | mSigma | # | mSigma | Score | rdb  | e;¥ | Conf | N-Rule |
|-----------|---|-------------|----------|-----------|--------|---|--------|-------|------|-----|------|--------|
| 250.0789  | 1 | C14H14ClFN  | 250.0793 | 1.6       | n.a.   | 1 | 100.00 | 7.5   | even |     |      | ok     |

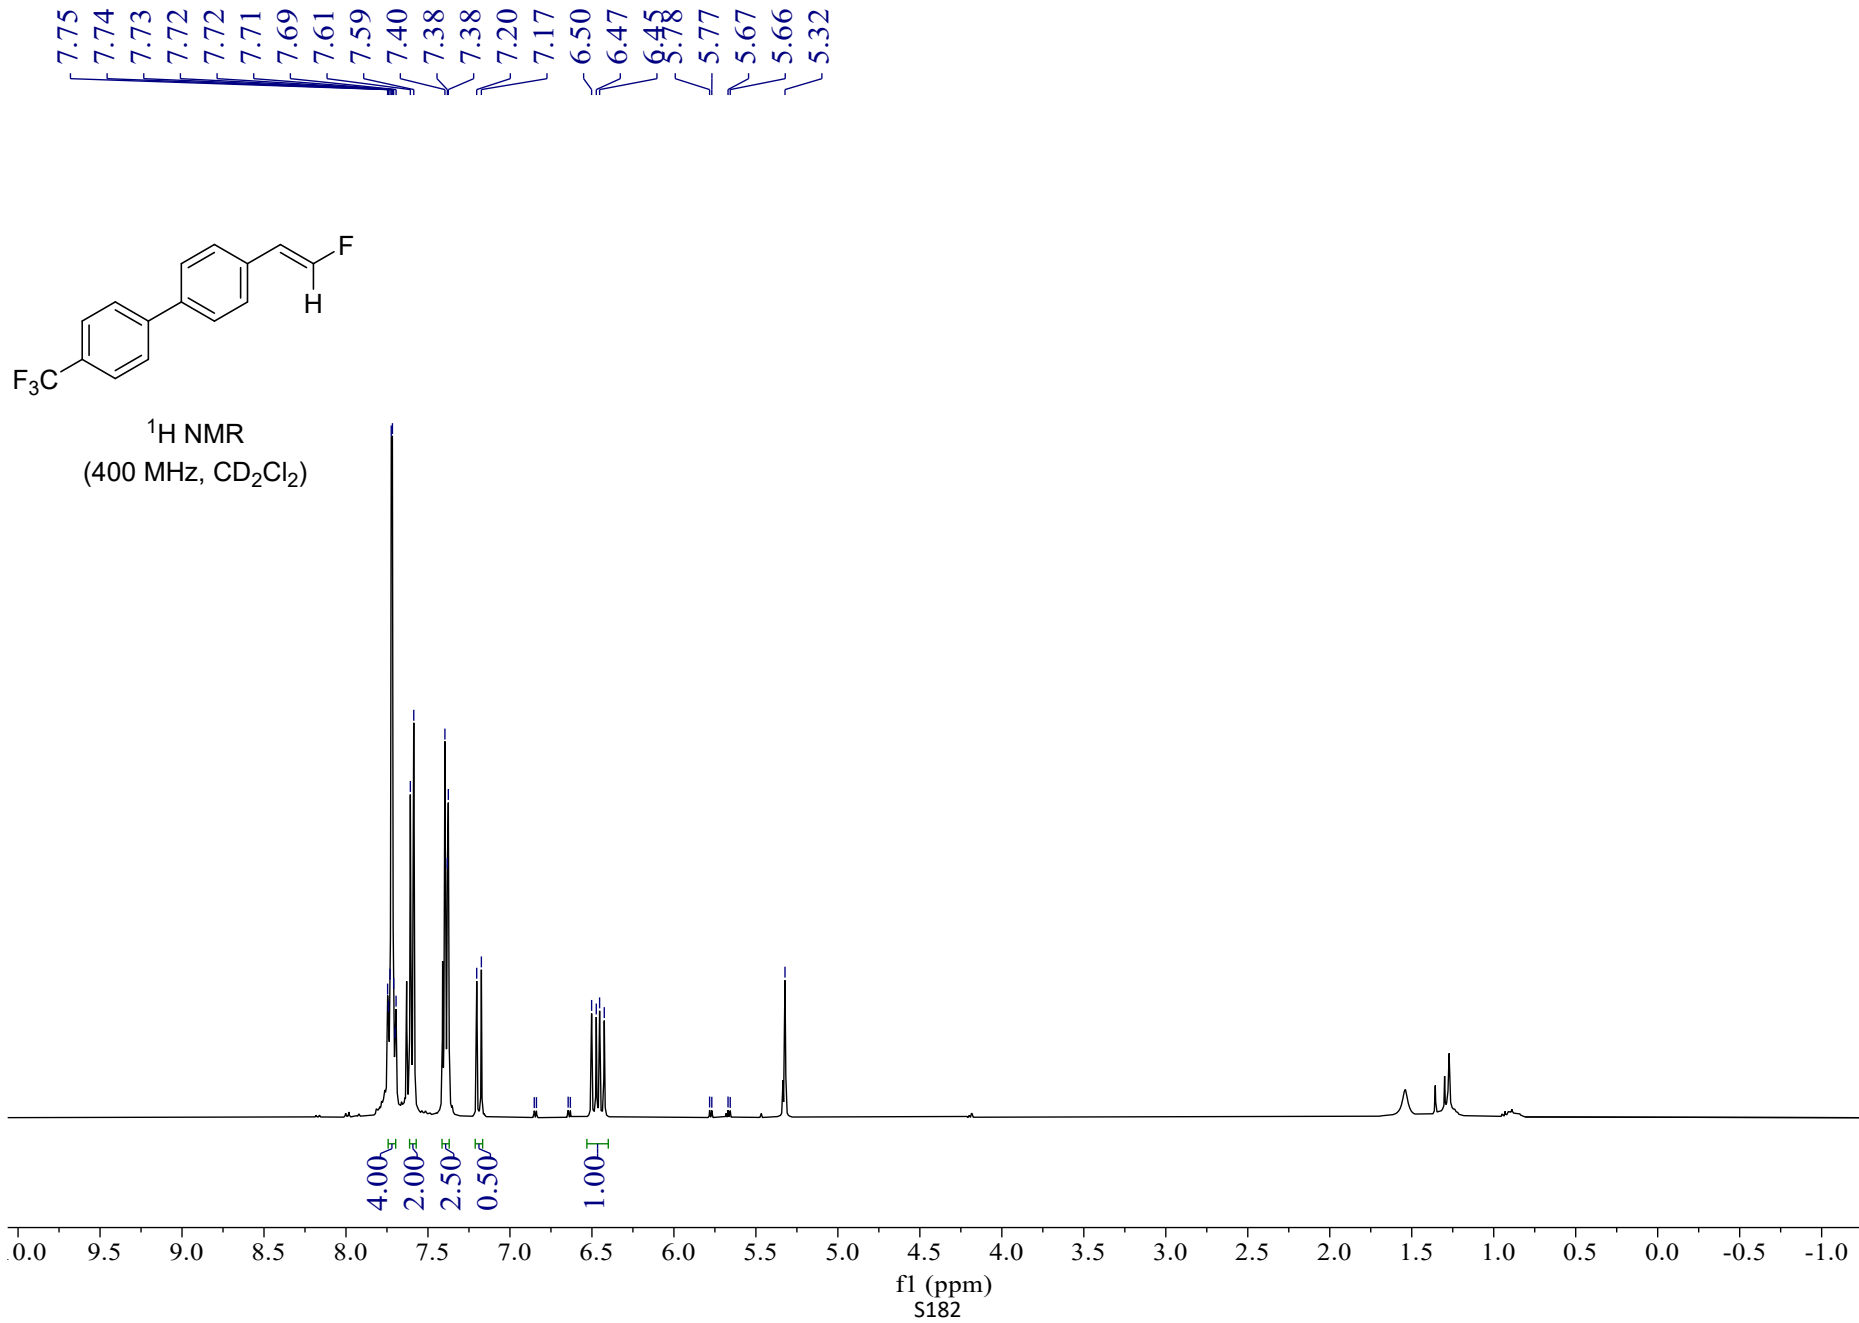

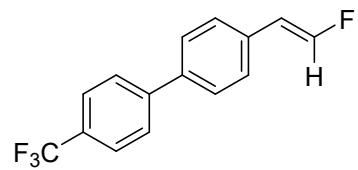

<sup>13</sup>C NMR  
(101 MHz, CDCl<sub>3</sub>)

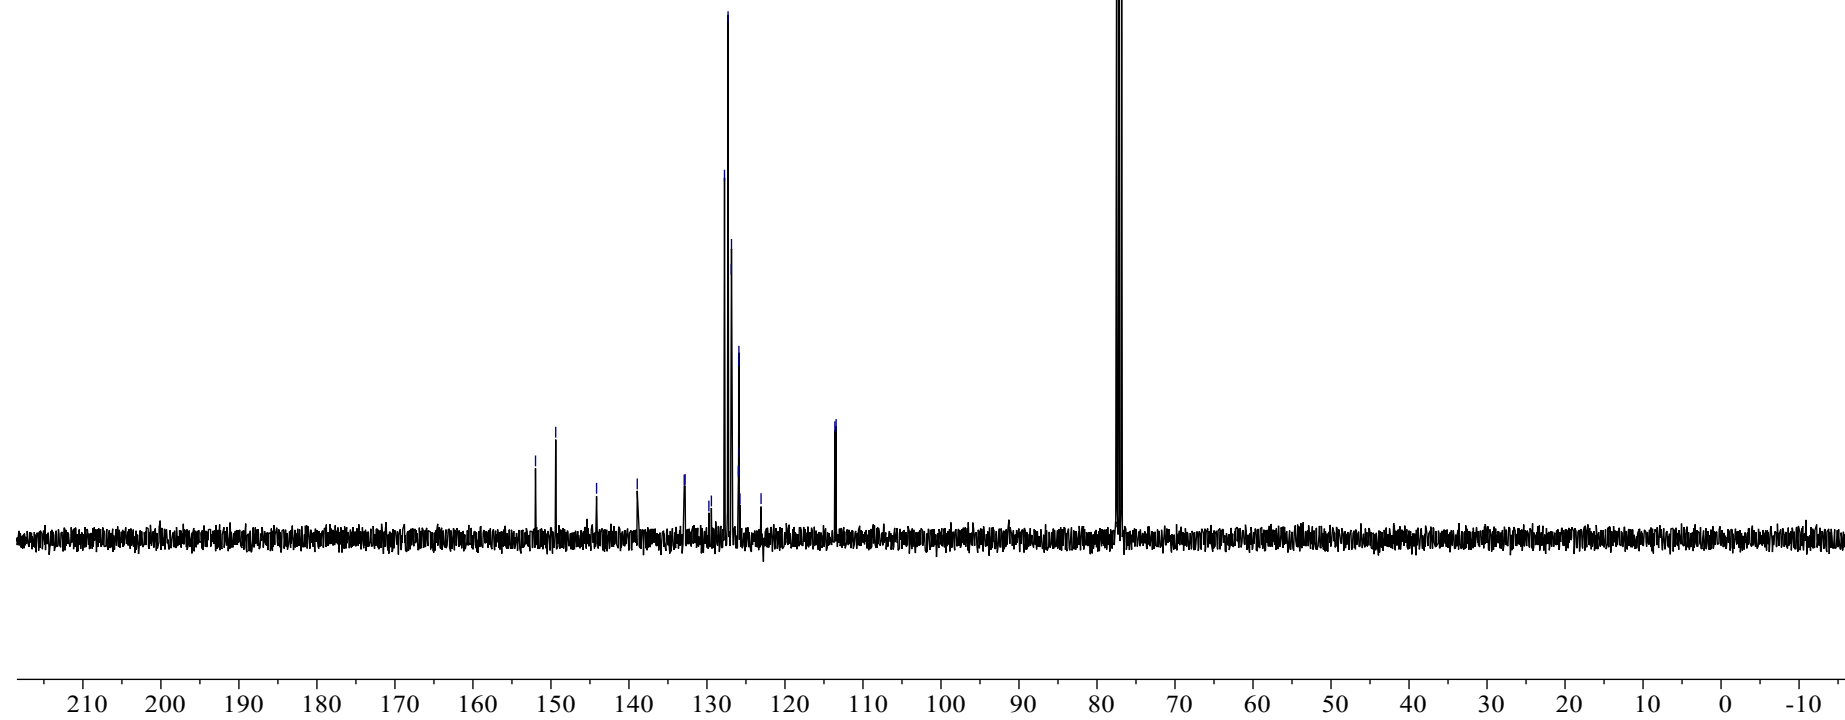

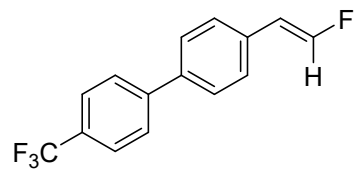

<sup>19</sup>F NMR  
(376 MHz, CDCl<sub>3</sub>)

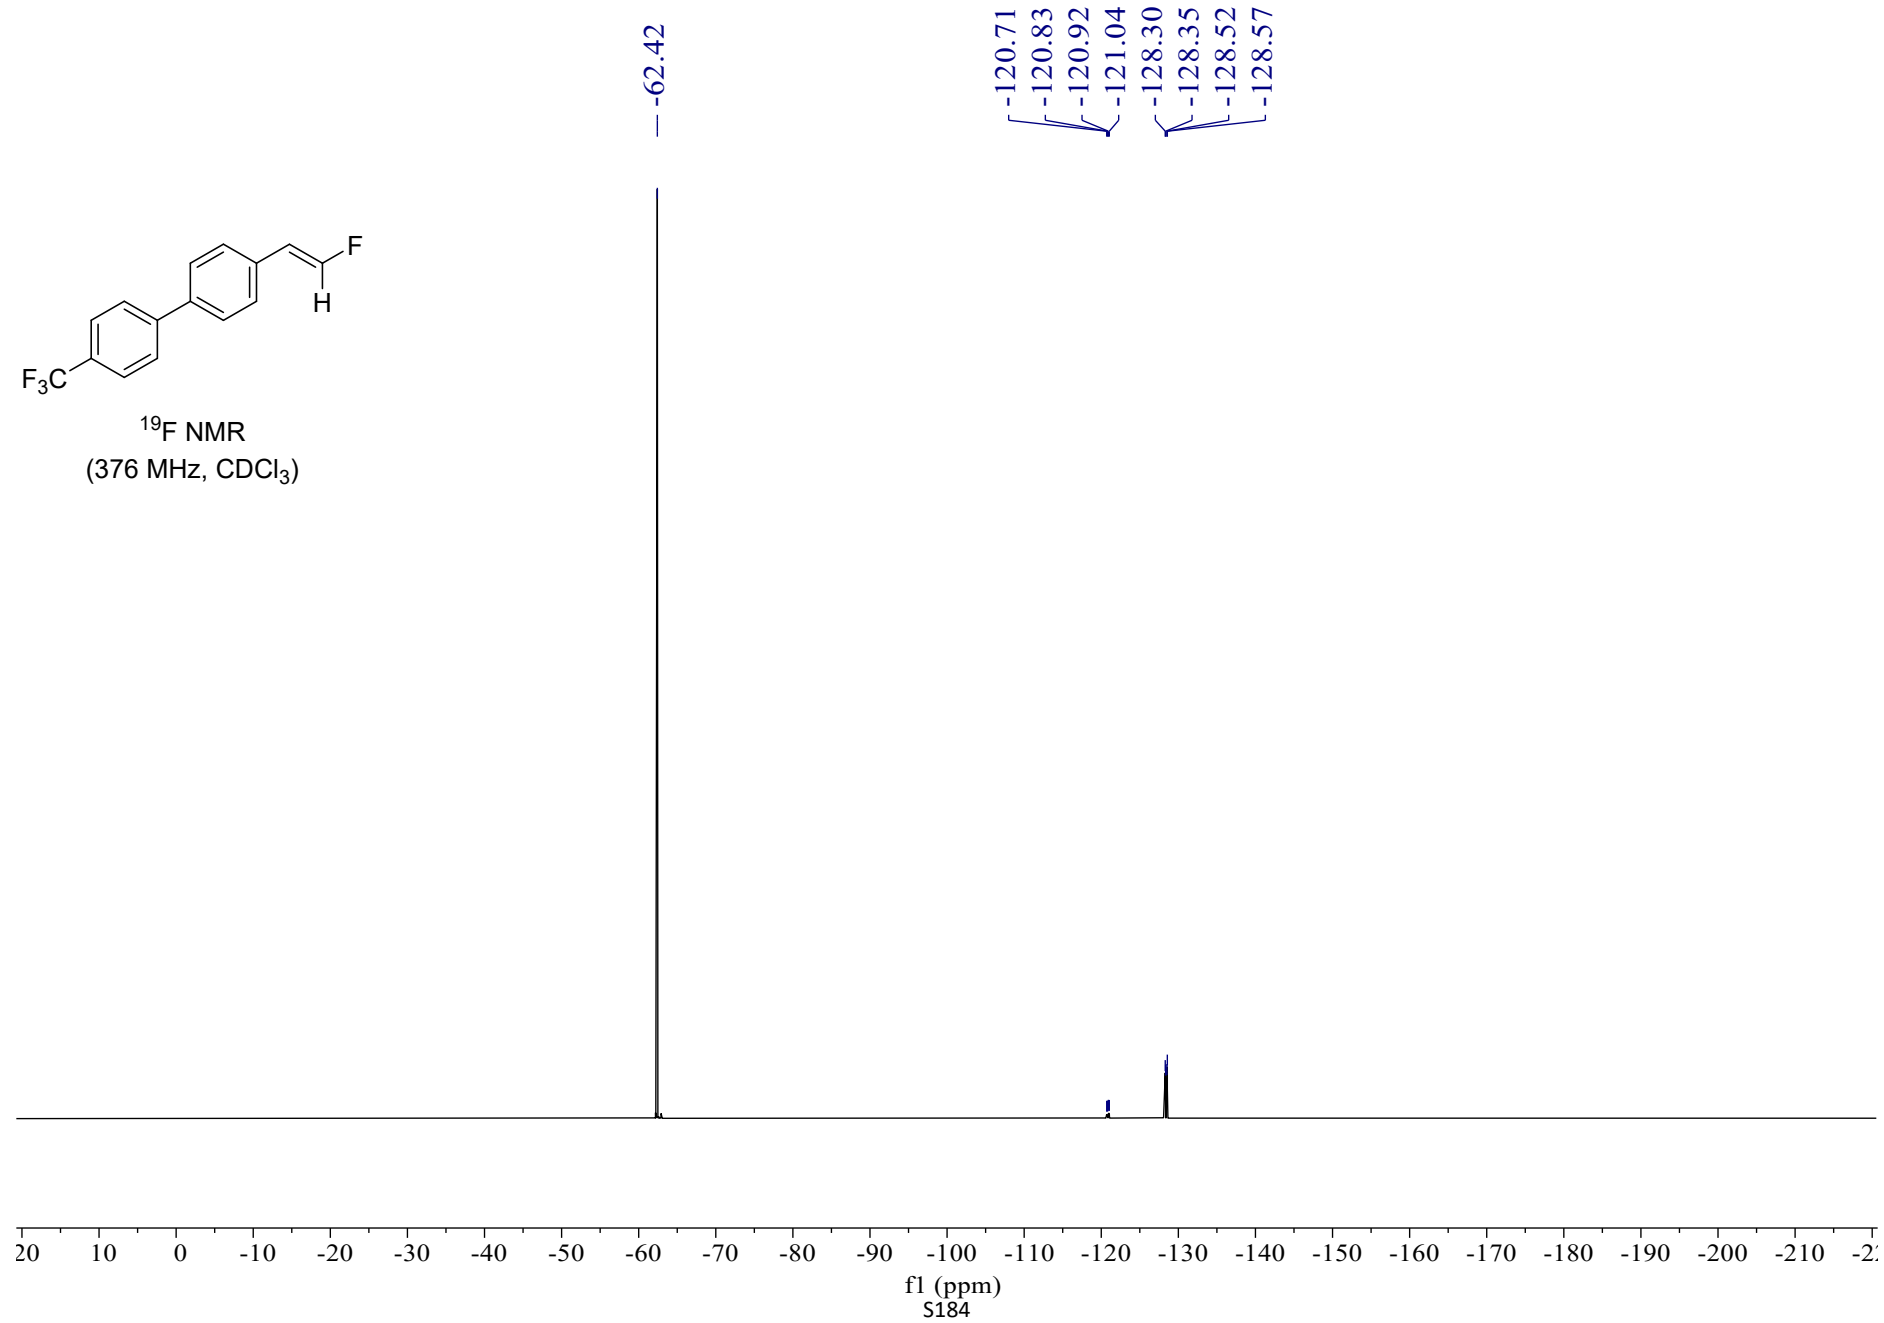

# Mass Spectrum SmartFormula Report

## Analysis Info

Analysis Name D:\LXMS\0106\_RC4\_01\_20521.d  
Method LC\_NO UV\_P50-1500\_6MIN.m  
Sample Name 0106

Acquisition D 2023-01-09 10:54:33

Operator Demo User  
Instrument compact 8255754.2017  
6

## Comment

## Acquisition Paramet

|             |            |               |          |                |           |
|-------------|------------|---------------|----------|----------------|-----------|
| Source Type | ESI        | Ion Polarity  | Positive | Set Nebulizer  | 3.0 Bar   |
| Focus       | Not active | Set Capillary | 4000 V   | Set Dry Heater | 200 °C    |
| Scan Begin  | 50 m/z     | Set End Plate | -500 V   | Set Dry Gas    | 8.0 l/min |

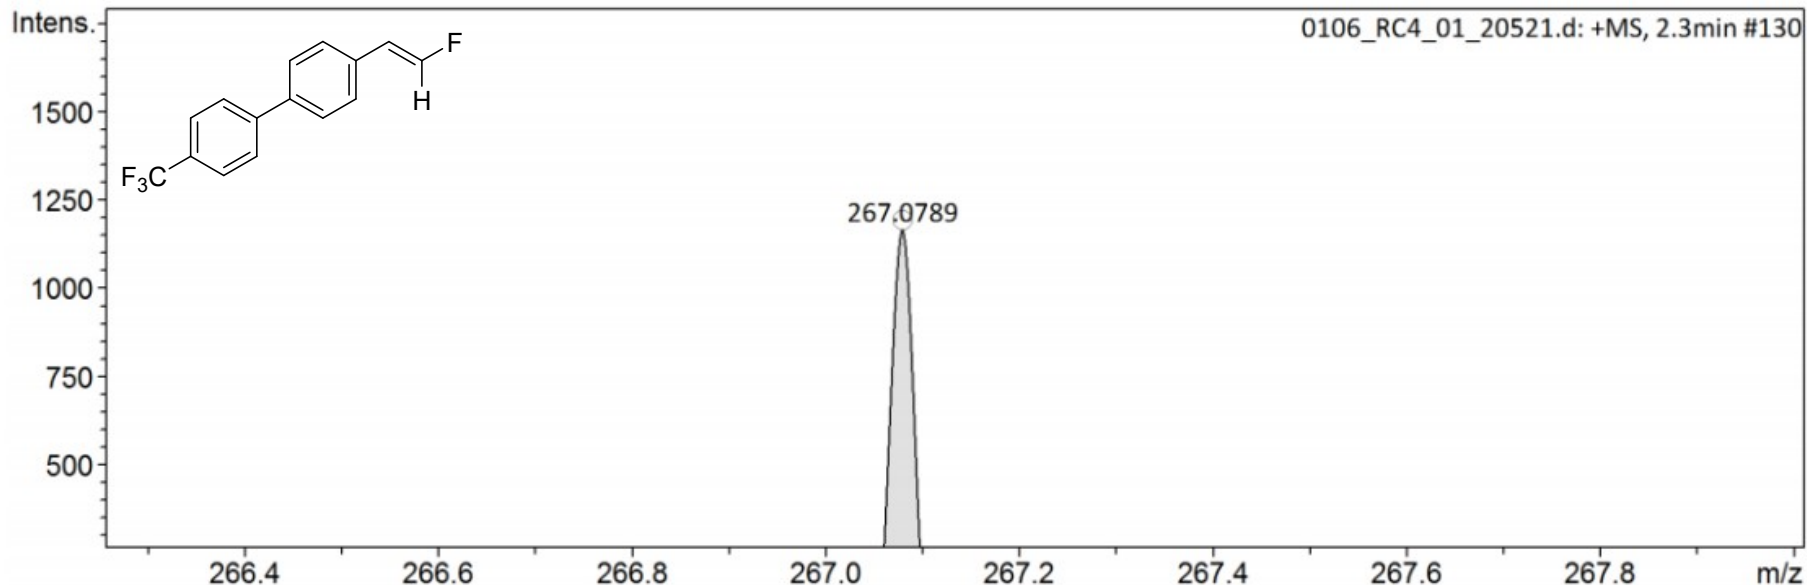

| Meas. m/z | # | Ion Formula | m/z      | err [ppm] | mSigma | # | mSigma | Score | rdb  | e;¥ | Conf | N-Rule |
|-----------|---|-------------|----------|-----------|--------|---|--------|-------|------|-----|------|--------|
| 267.0789  | 1 | C15H11F4    | 267.0791 | 1.1       | n.a.   | 1 | 100.00 | 8.5   | even |     |      | ok     |

7.58  
7.58  
7.57  
7.53  
7.51  
7.47  
7.46  
7.45  
7.45  
7.39  
7.37  
7.35  
7.34  
7.32  
7.15  
7.12  
6.48  
6.43  
5.73  
5.72  
5.62  
5.61

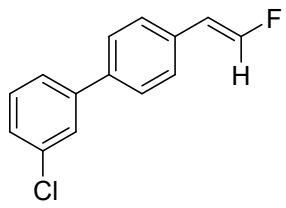

<sup>1</sup>H NMR  
(400 MHz, CDCl<sub>3</sub>)

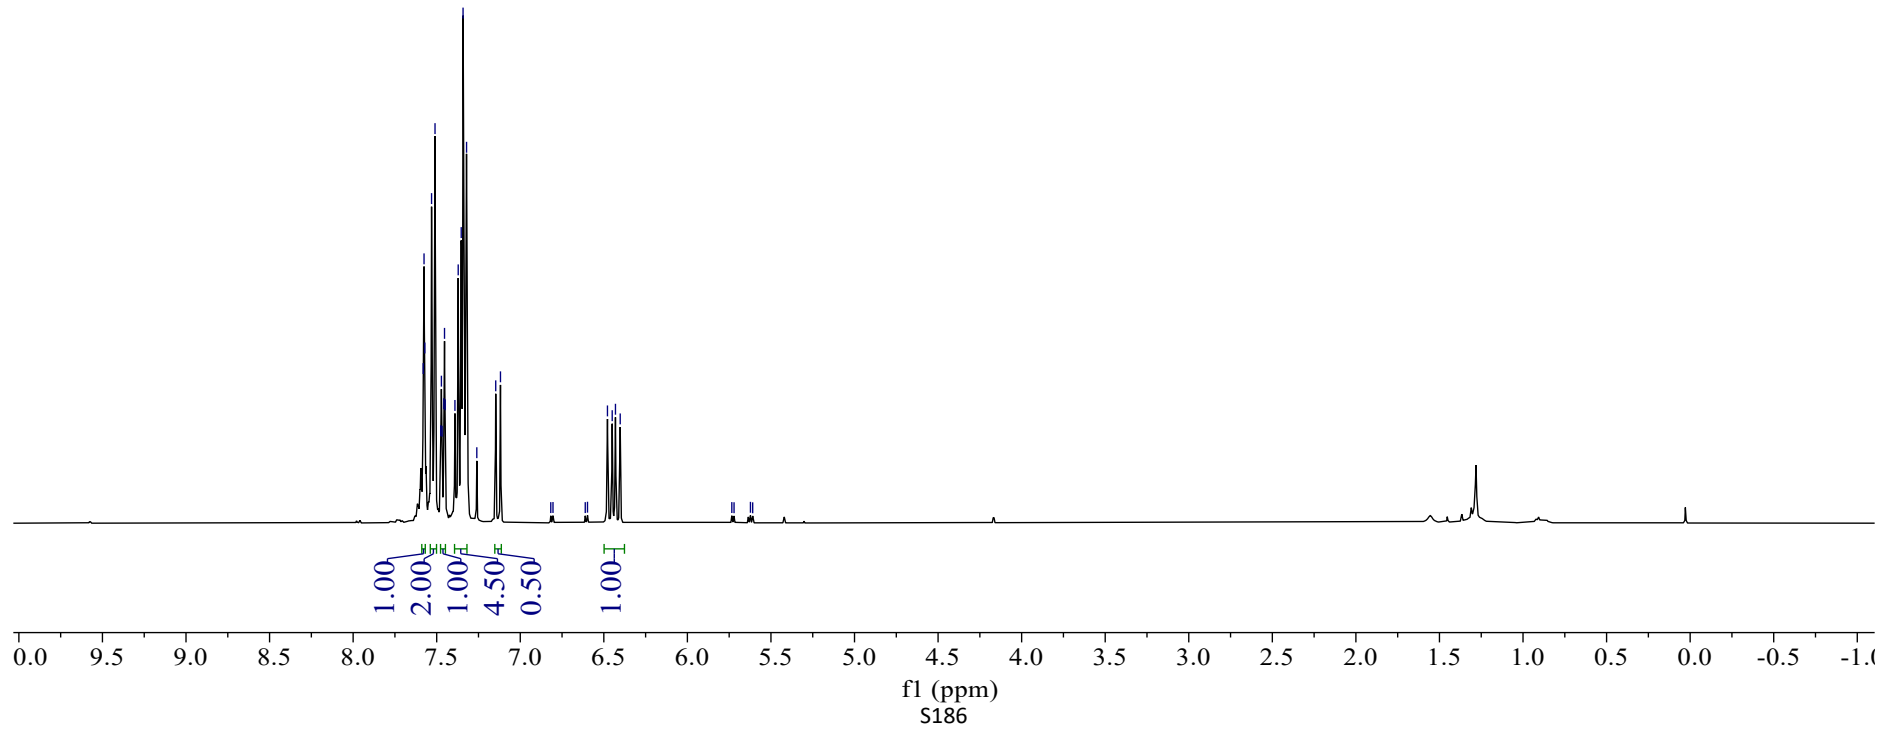

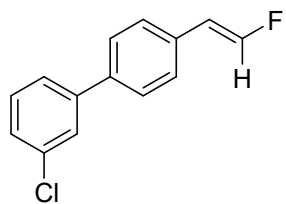

$^{13}\text{C}$  NMR  
(101 MHz,  $\text{CDCl}_3$ )

151.85  
149.26  
142.48  
138.99  
138.96  
134.87  
132.53  
132.41  
130.18  
127.55  
127.52  
127.15  
126.79  
126.76  
125.16  
113.63  
113.47

77.48  
77.16  
76.84

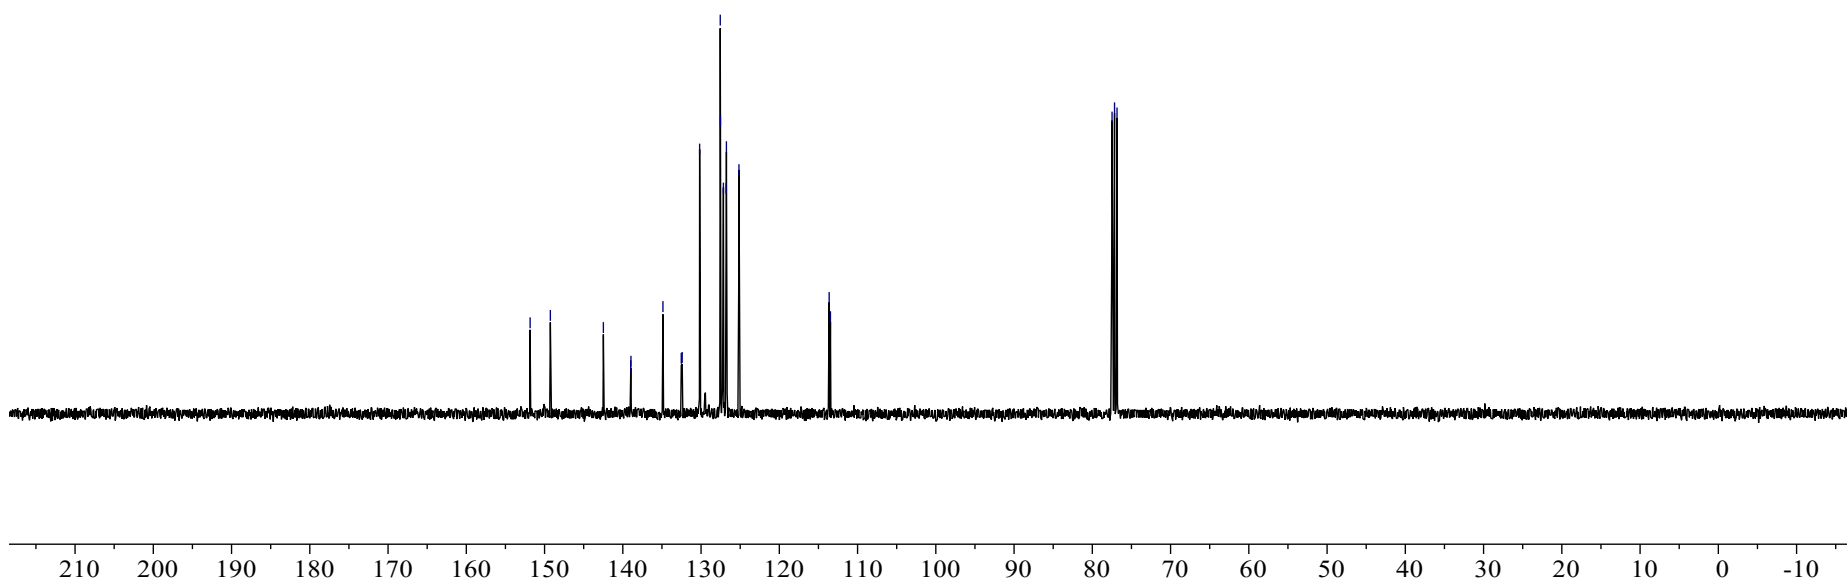

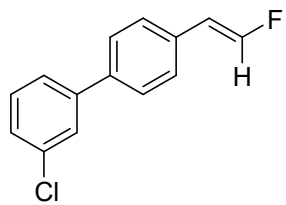

<sup>19</sup>F NMR  
(376 MHz, CDCl<sub>3</sub>)

-120.93  
-121.04  
-121.15  
-121.26  
-128.62  
-128.67  
-128.84  
-128.89

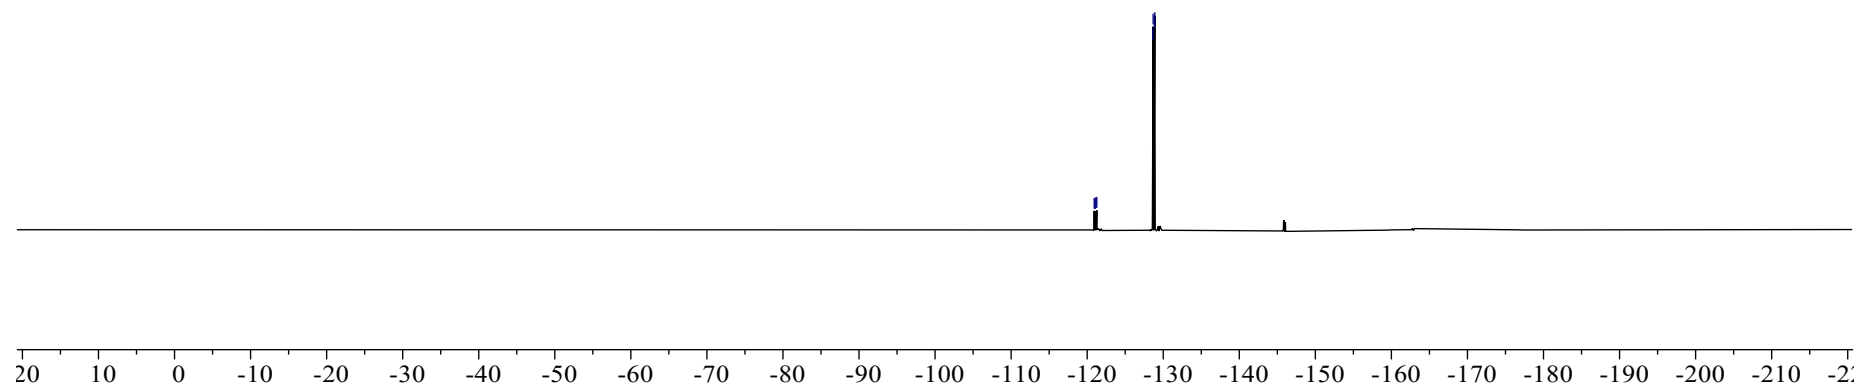



# Mass Spectrum SmartFormula Report

## Analysis Info

Analysis Name D:\LXMS\0106\_RA7\_01\_20508.d  
Method LC\_NO UV\_P50-1500\_6MIN.m  
Sample Name 0106

Acquisition D 2023-01-09 9:17:19

Operator Demo User

Instrument compact 8255754.2017  
6

## Comment

## Acquisition Paramet

|             |            |               |          |                |           |
|-------------|------------|---------------|----------|----------------|-----------|
| Source Type | ESI        | Ion Polarity  | Positive | Set Nebulizer  | 3.0 Bar   |
| Focus       | Not active | Set Capillary | 4000 V   | Set Dry Heater | 200 °C    |
| Scan Begin  | 50 m/z     | Set End Plate | -500 V   | Set Dry Gas    | 8.0 l/min |

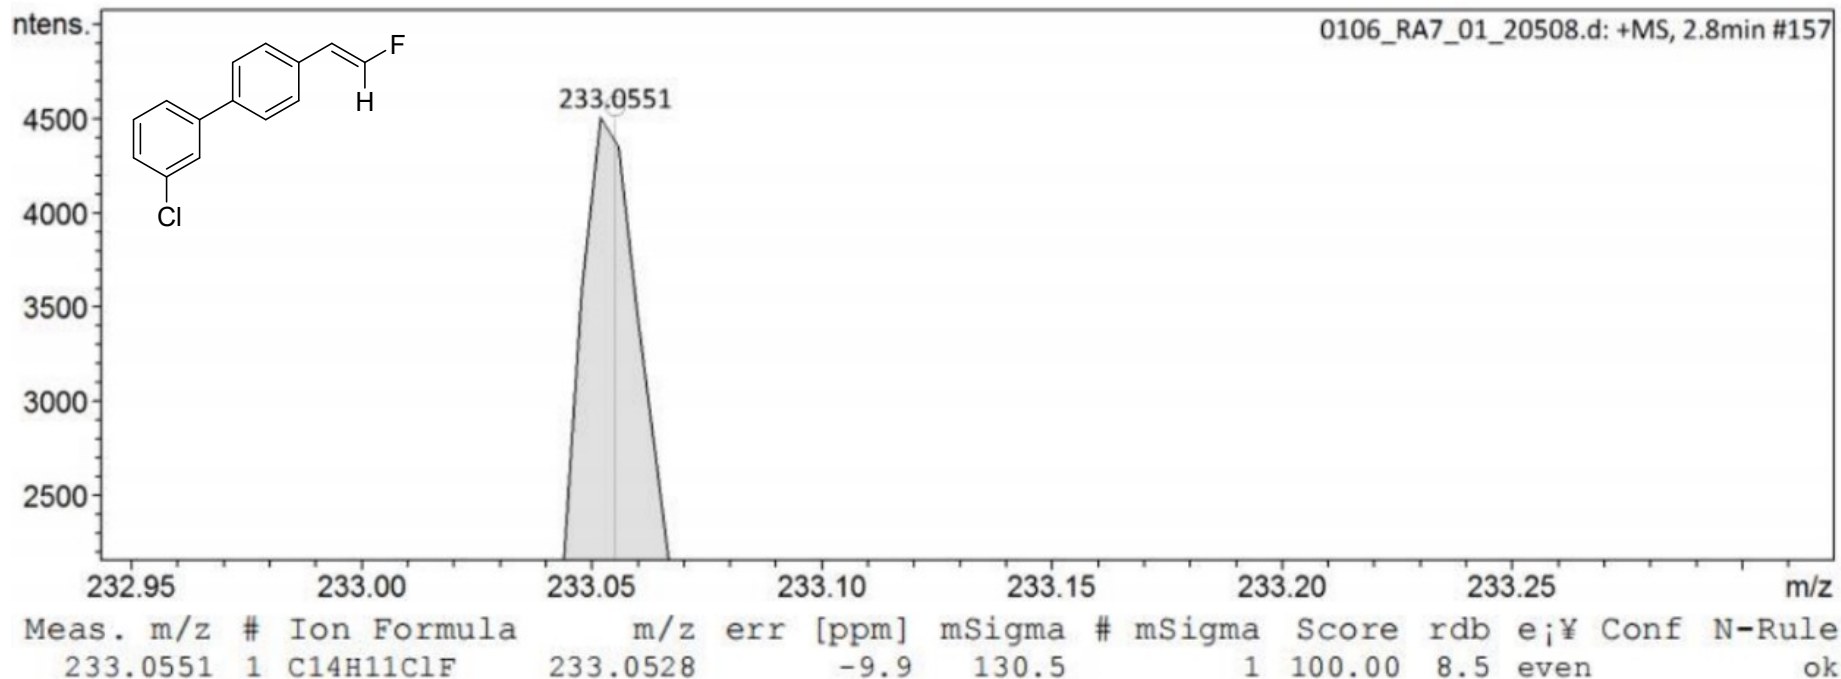

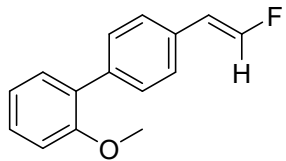

<sup>1</sup>H NMR  
(400 MHz, CDCl<sub>3</sub>)

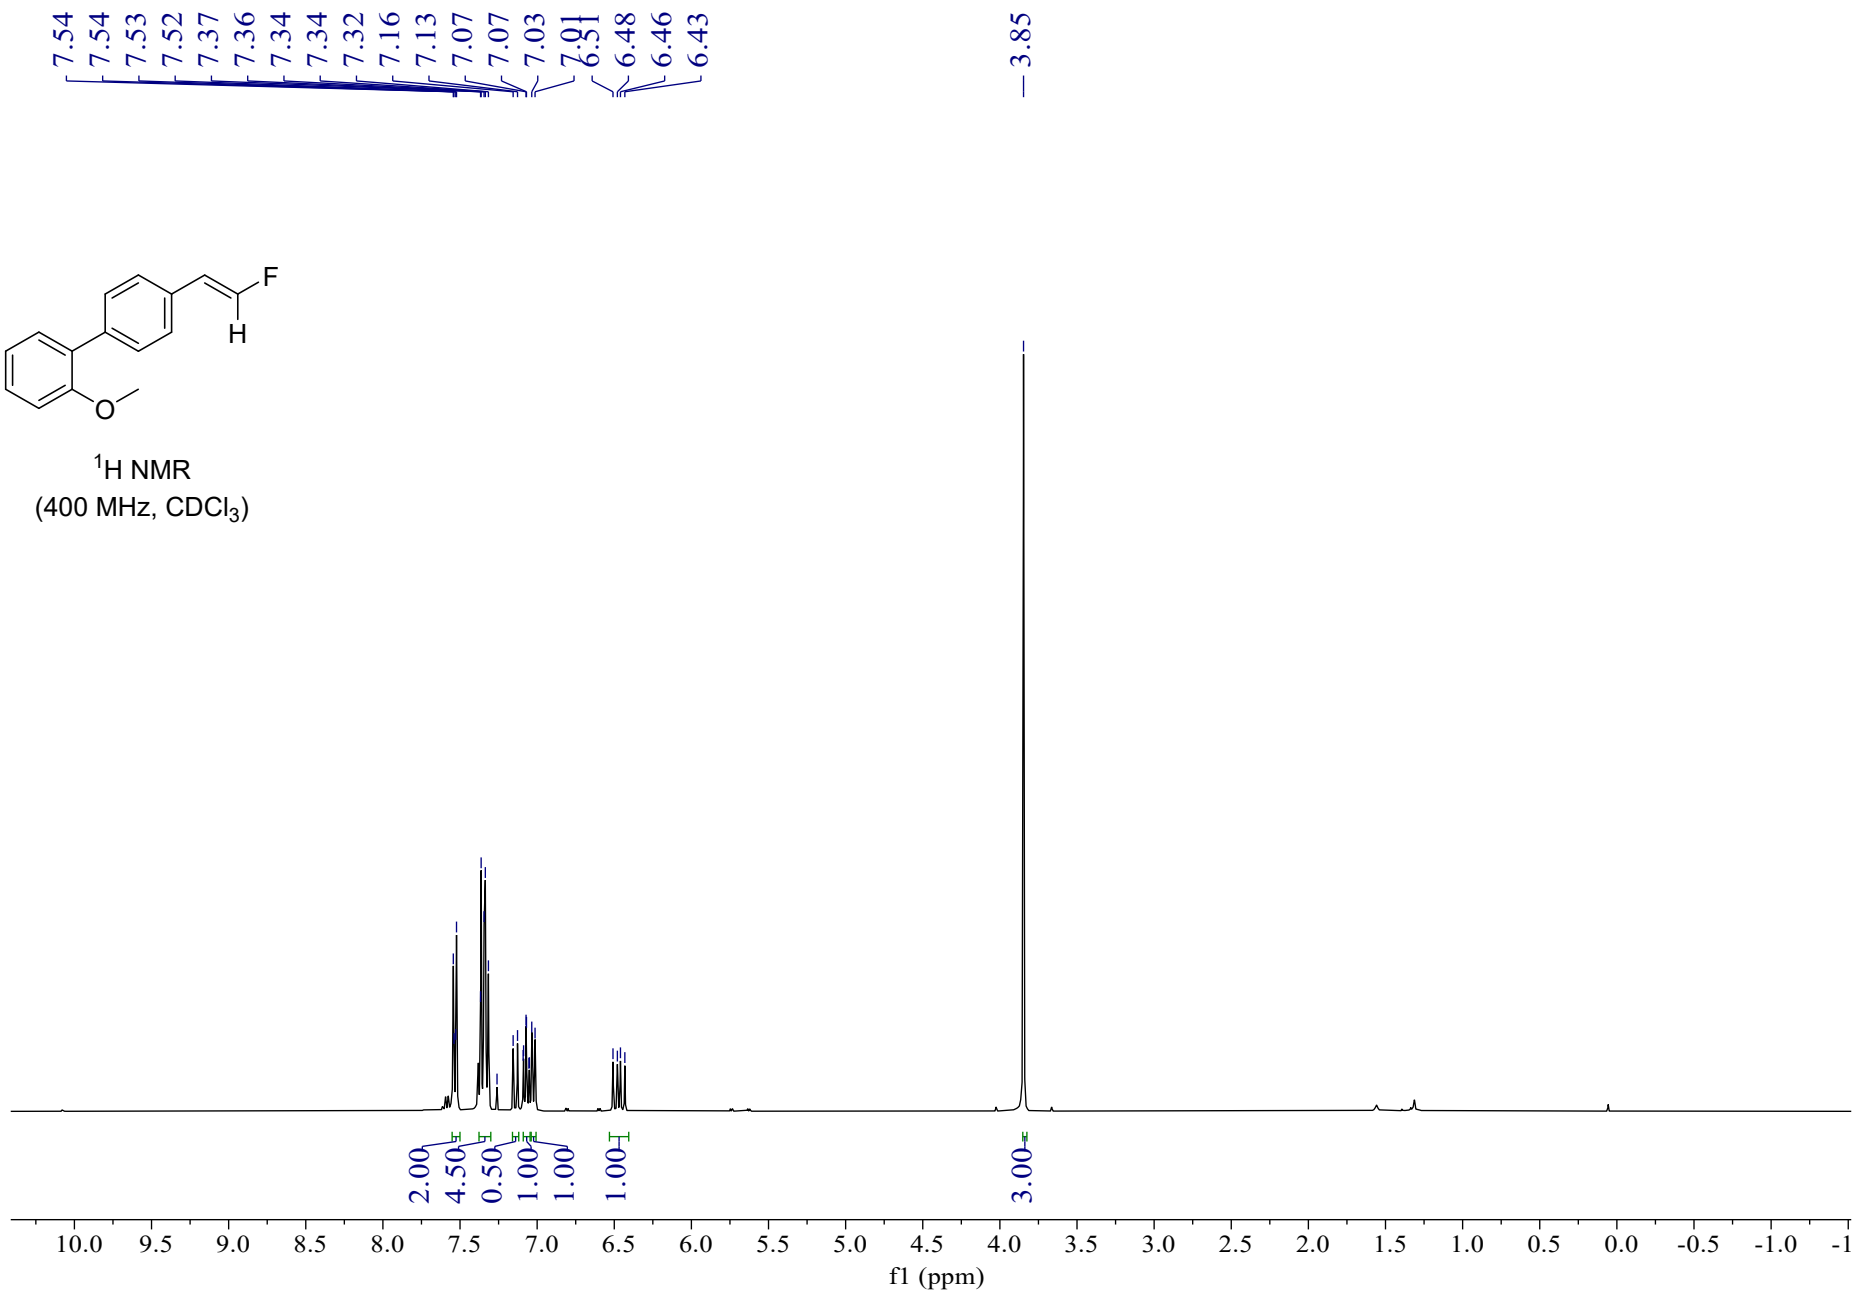

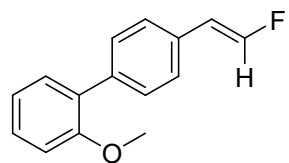

<sup>13</sup>C NMR  
(101 MHz, CDCl<sub>3</sub>)

— 156.59  
— 148.97  
└ 137.92  
└ 137.90  
— 130.20  
— 125.91  
— 121.01  
└ 113.92  
└ 113.76  
└ 111.37  
  
└ 77.48  
└ 77.16  
└ 76.84  
  
— 55.64

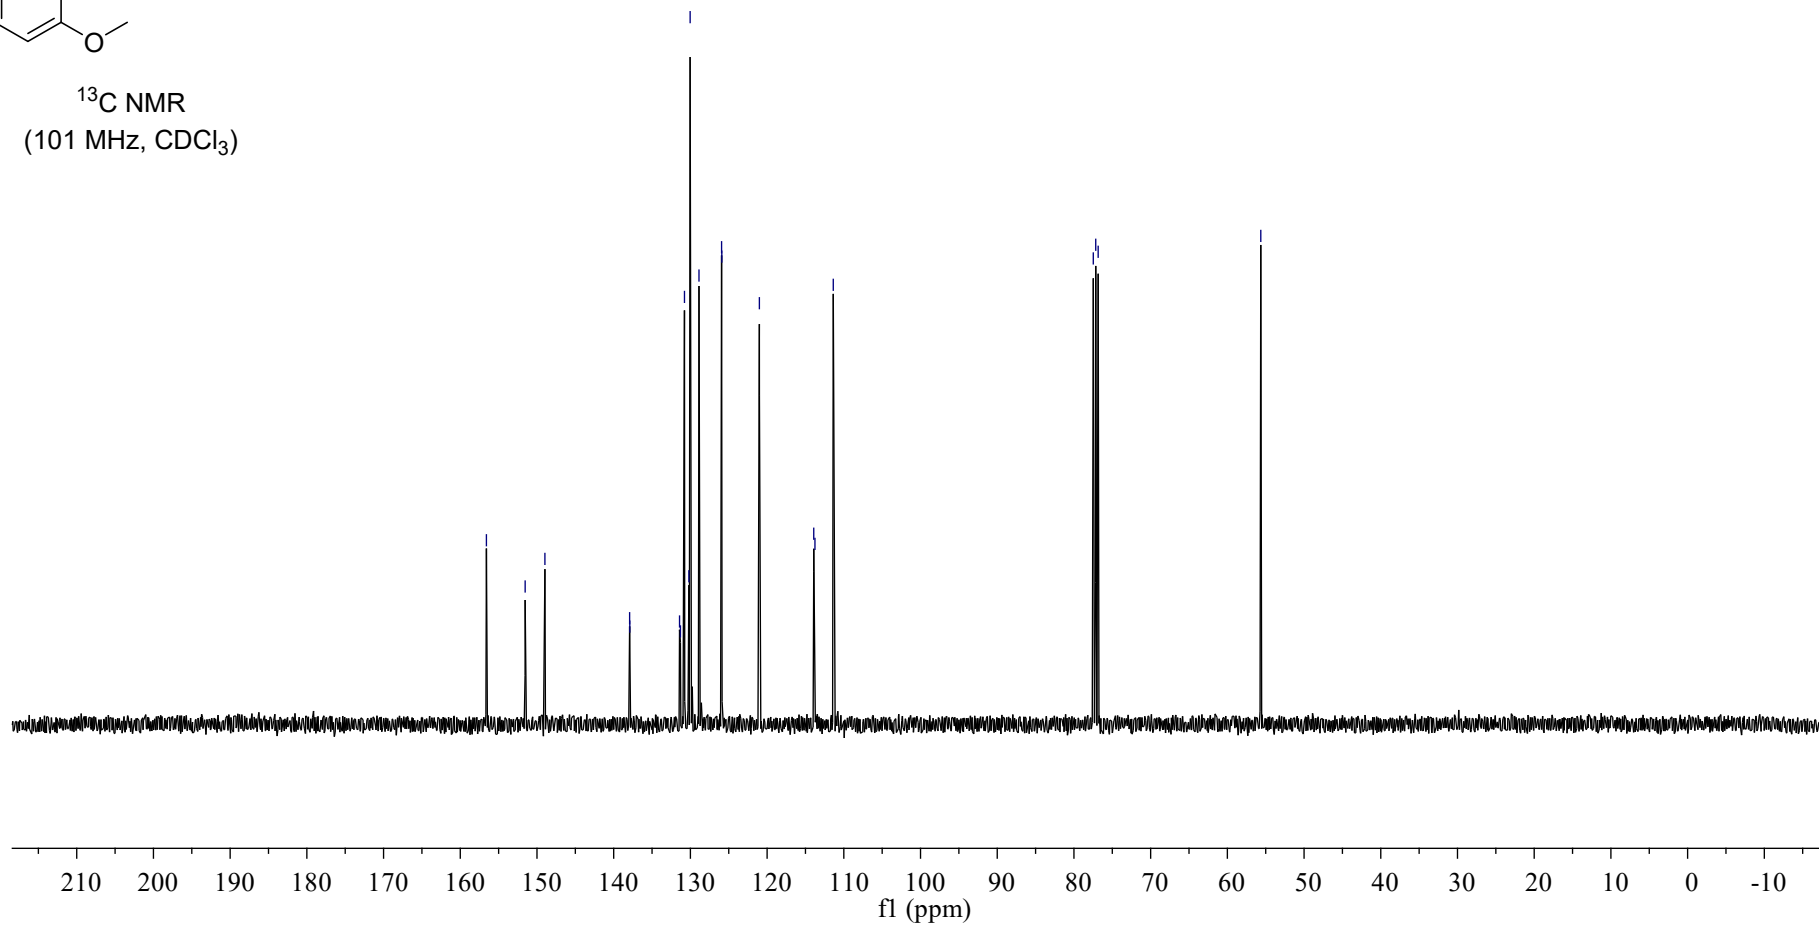

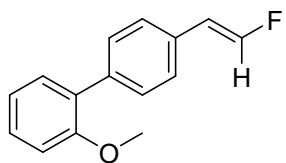

<sup>19</sup>F NMR  
(376 MHz, CDCl<sub>3</sub>)

-121.88  
-122.00  
-122.10  
-122.10  
-122.22  
-129.78  
-129.83  
-130.00  
-130.05

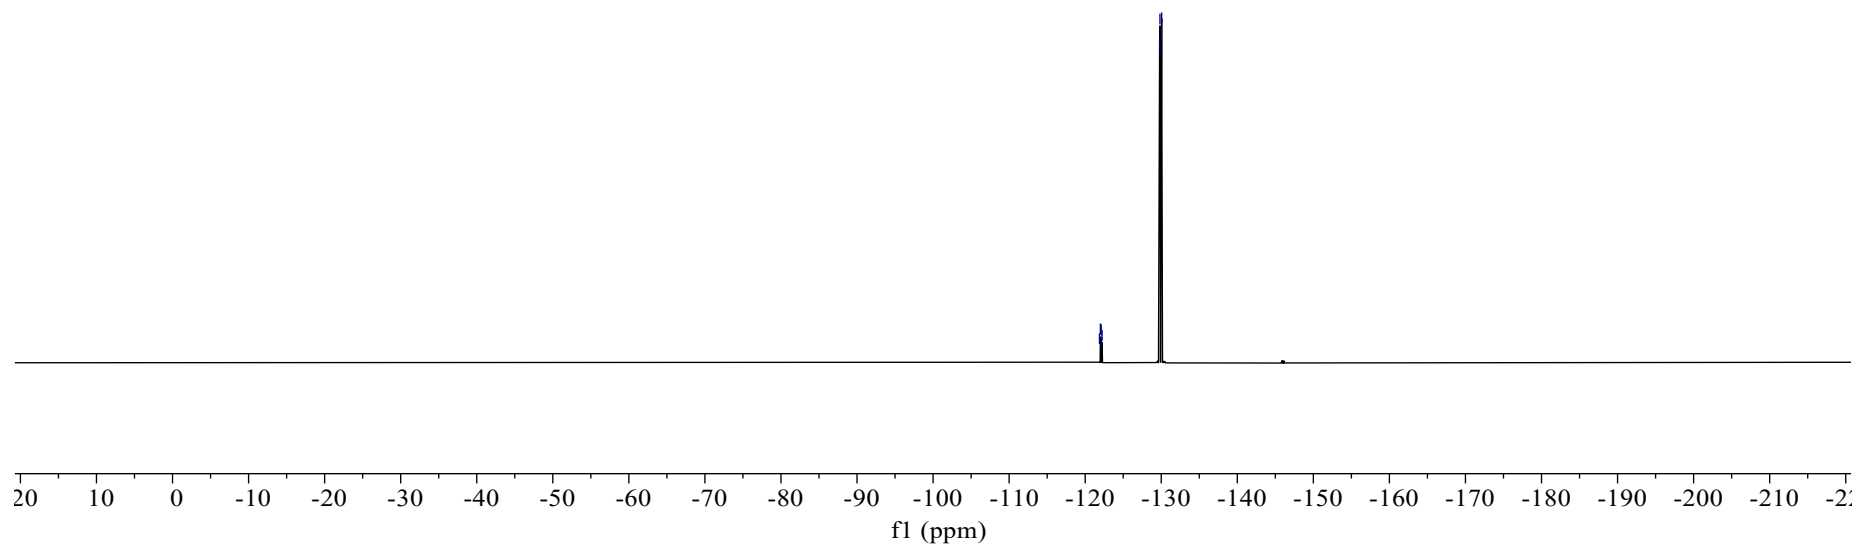

# Mass Spectrum SmartFormula Report

## Analysis Info

Analysis Name D:\LXMS\0306\_BC5\_01\_22069.d  
Method LC\_NO UV\_P50-1500\_10MIN.m  
Sample Name 0306

Acquisition D 2023-03-10 16:47:41

Operator Demo User  
Instrument compact 8255754.2017  
6

## Comment

## Acquisition Paramet

|             |            |               |          |                |           |
|-------------|------------|---------------|----------|----------------|-----------|
| Source Type | ESI        | Ion Polarity  | Positive | Set Nebulizer  | 3.0 Bar   |
| Focus       | Not active | Set Capillary | 4000 V   | Set Dry Heater | 200 °C    |
| Scan Begin  | 50 m/z     | Set End Plate | -500 V   | Set Dry Gas    | 8.0 l/min |

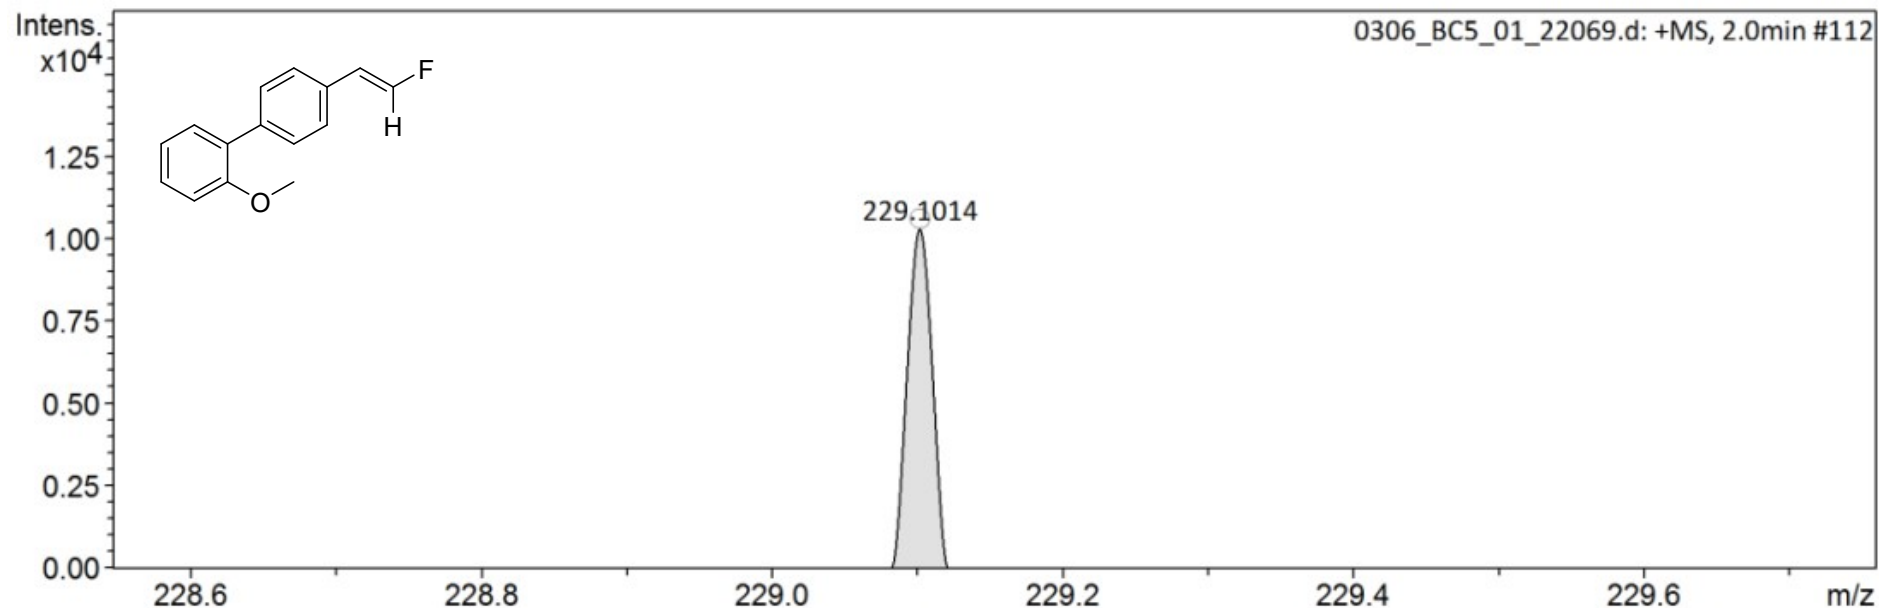

| Meas. m/z | # | Ion Formula | m/z      | err [ppm] | mSigma | # | mSigma | Score  | rdb | e;¥  | Conf | N-Rule |
|-----------|---|-------------|----------|-----------|--------|---|--------|--------|-----|------|------|--------|
| 229.1014  | 1 | C15H14FO    | 229.1023 | 3.8       | 39.0   | 1 | 1      | 100.00 | 8.5 | even |      | ok     |

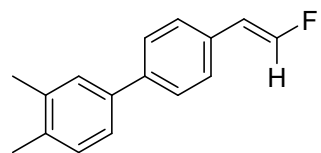

<sup>1</sup>H NMR  
(400 MHz, CDCl<sub>3</sub>)

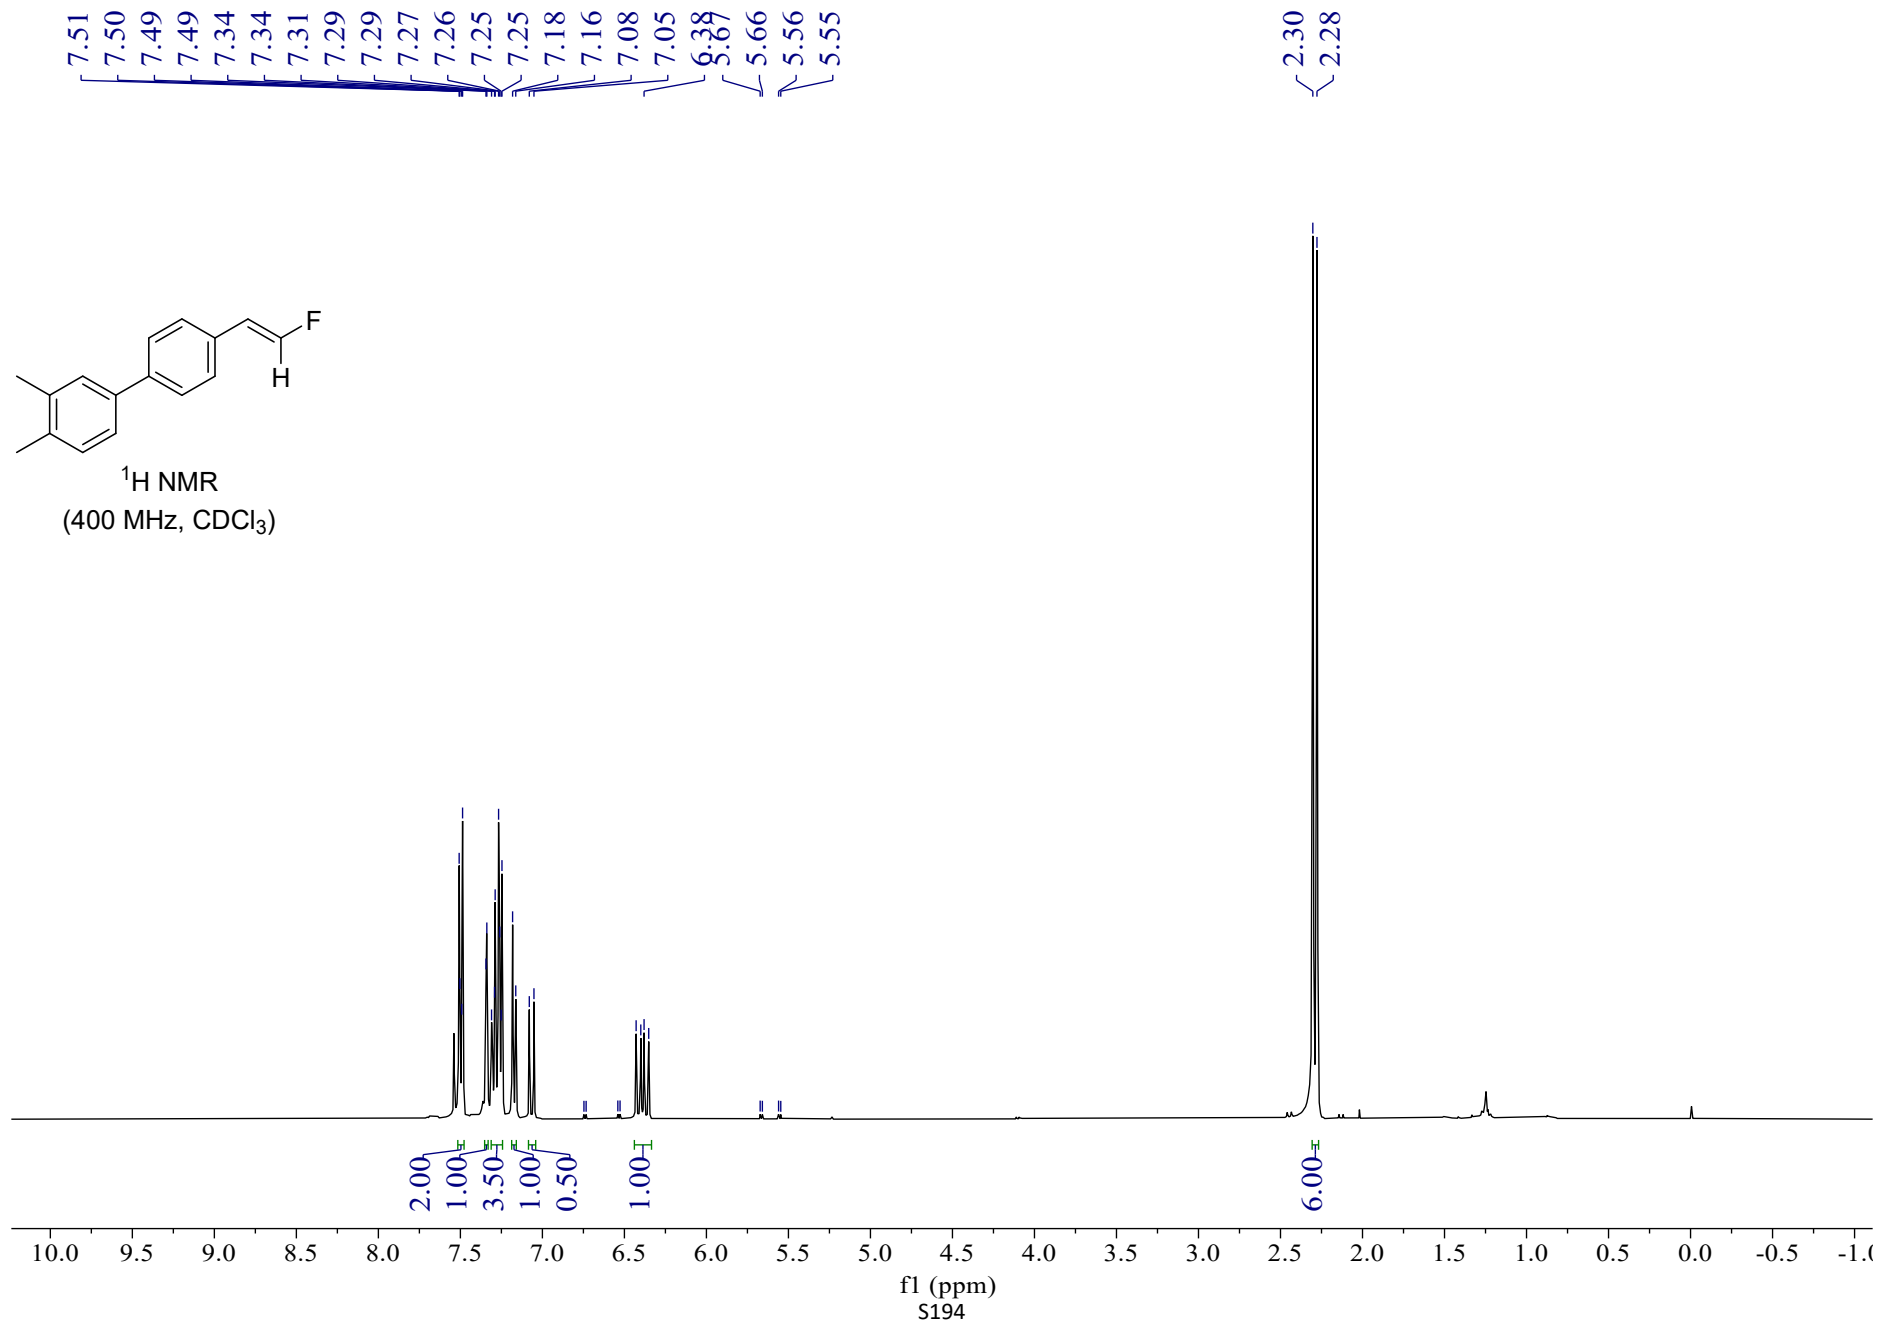

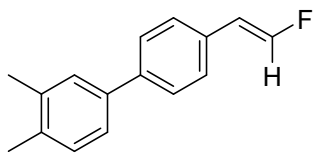

5u;  $^{13}\text{C}$  NMR  
(151 MHz,  $\text{CDCl}_3$ )

151.05  
149.34  
137.10  
131.34  
127.36  
124.38  
113.76  
113.65

77.37  
77.16  
76.95

20.04  
19.55

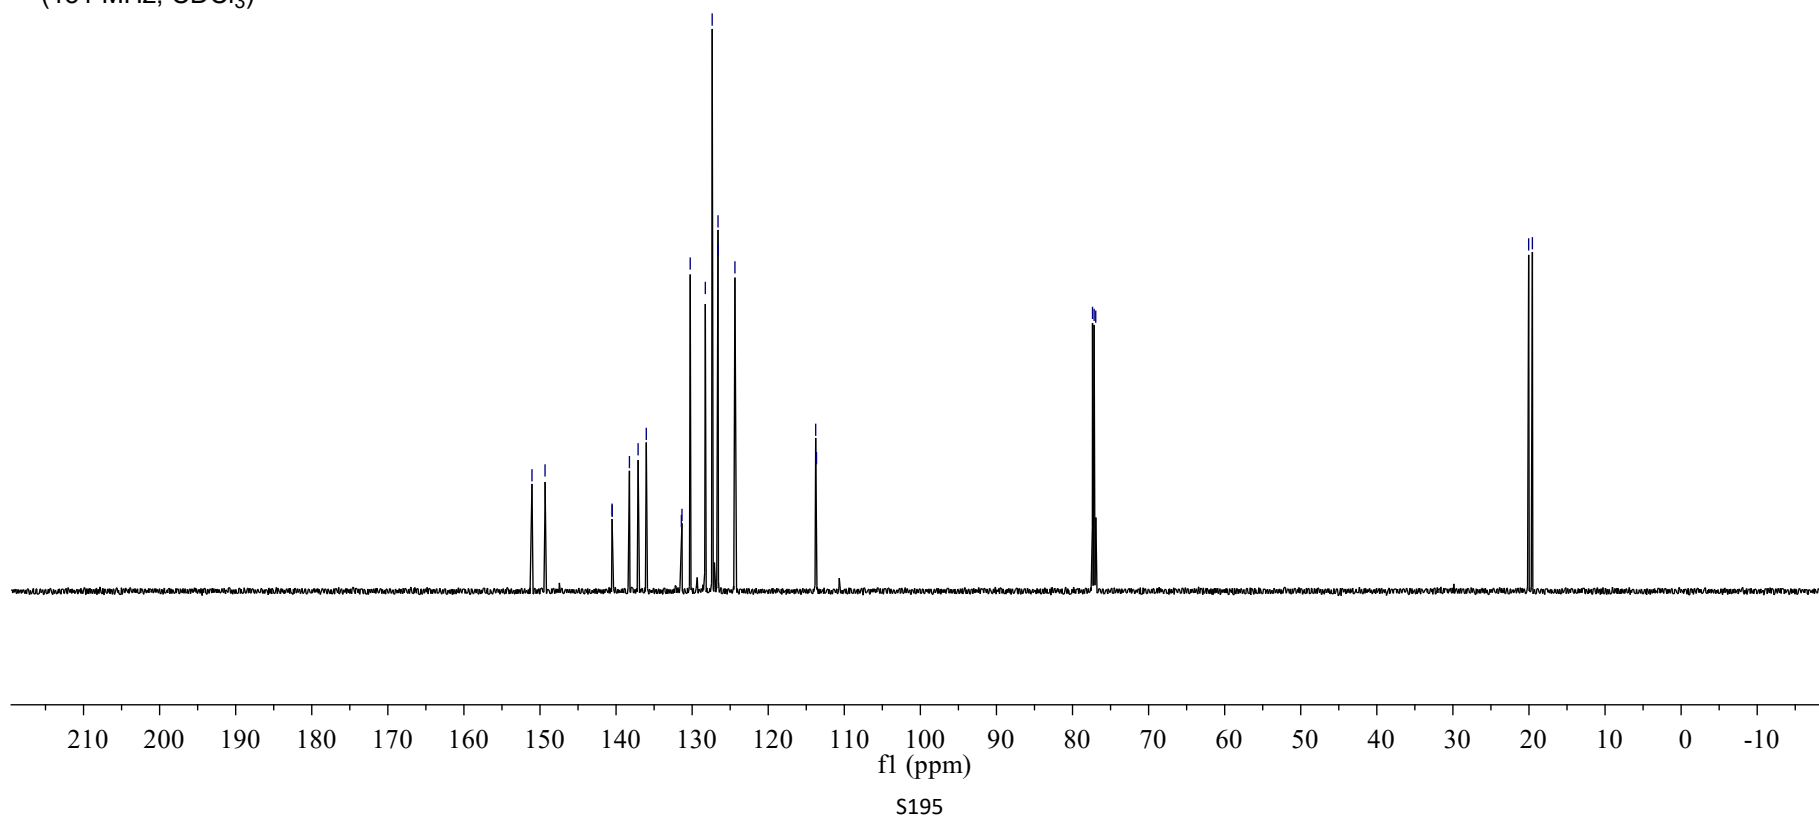

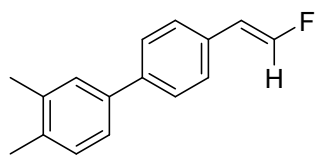

<sup>19</sup>F NMR  
(376 MHz, CDCl<sub>3</sub>)

-121.75  
-121.86  
-121.97  
-122.09  
-129.65  
-129.70  
-129.87  
-129.92

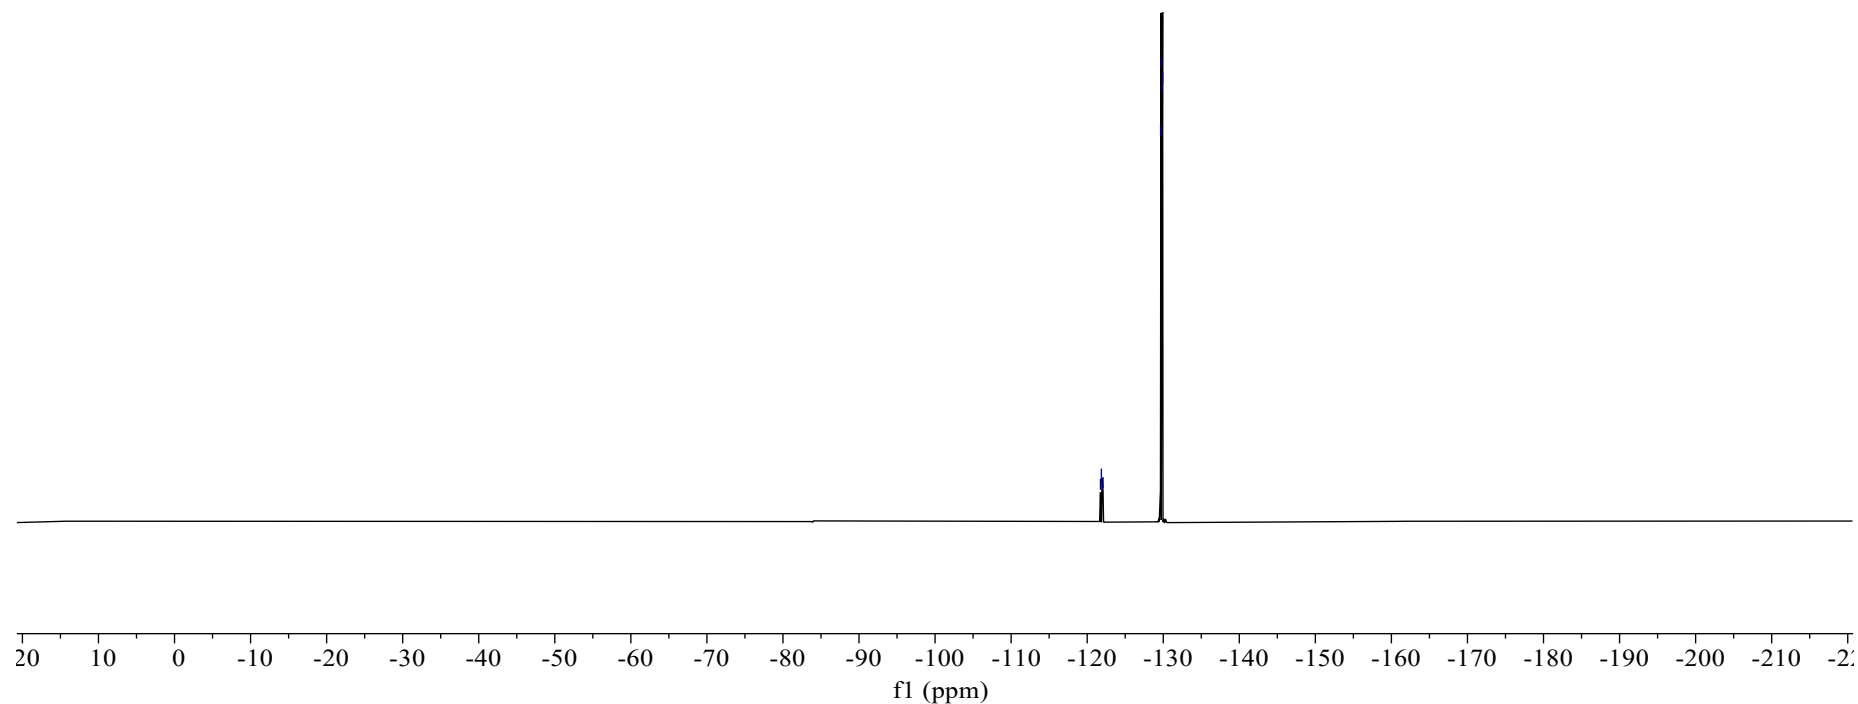



# Mass Spectrum SmartFormula Report

## Analysis Info

Analysis Name D:\LXMS\0106\_RA8\_01\_20509.d  
Method LC\_NO UV\_P50-1500\_6MIN.m  
Sample Name 0106

Acquisition D 2023-01-09 9:24:39

Operator Demo User  
Instrument compact 8255754.2017  
6

## Comment

## Acquisition Paramet

|             |            |               |          |                |           |
|-------------|------------|---------------|----------|----------------|-----------|
| Source Type | ESI        | Ion Polarity  | Positive | Set Nebulizer  | 3.0 Bar   |
| Focus       | Not active | Set Capillary | 4000 V   | Set Dry Heater | 200 °C    |
| Scan Begin  | 50 m/z     | Set End Plate | -500 V   | Set Dry Gas    | 8.0 l/min |

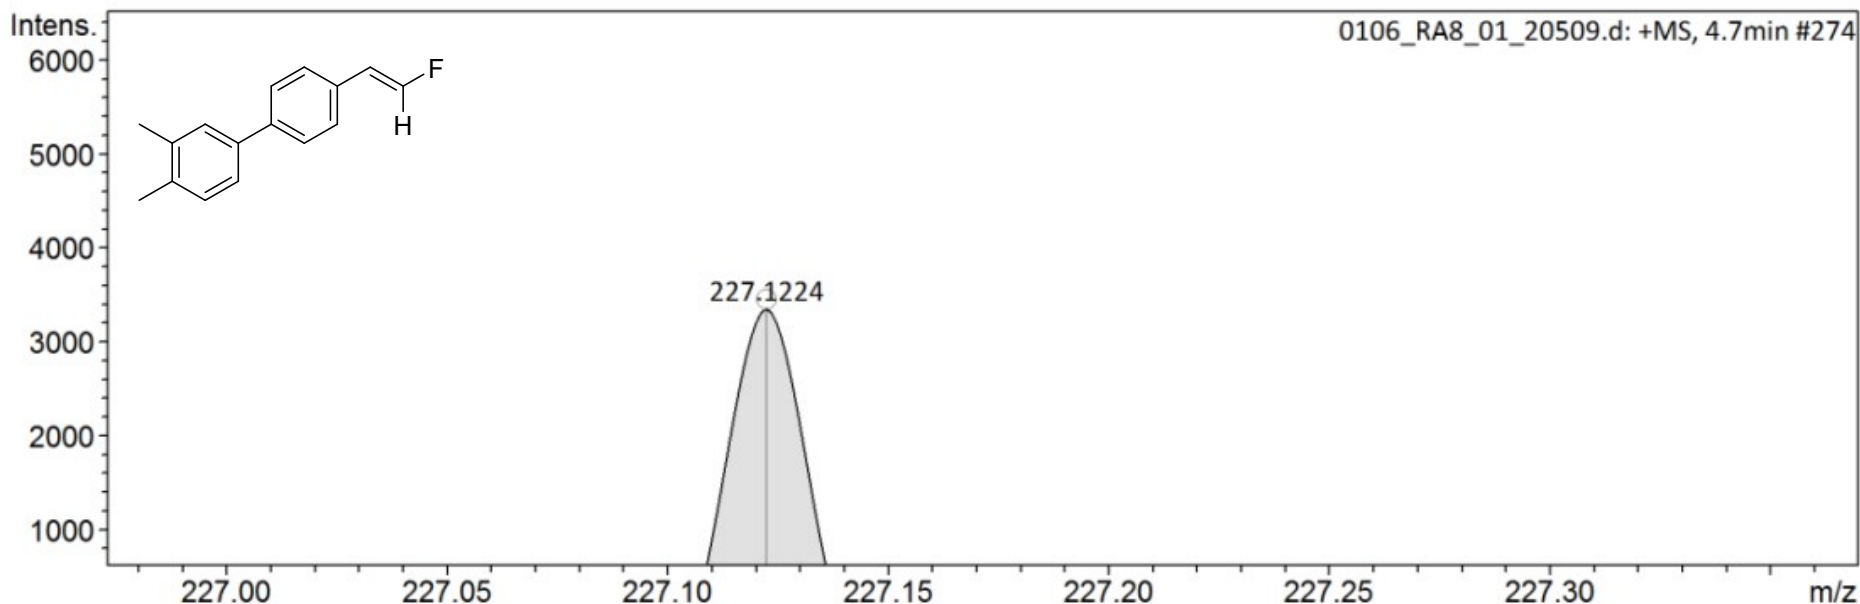

| Meas. m/z | # | Ion Formula | m/z      | err [ppm] | mSigma | # | mSigma | Score | rdb  | e;¥ | Conf | N-Rule |
|-----------|---|-------------|----------|-----------|--------|---|--------|-------|------|-----|------|--------|
| 227.1224  | 1 | C16H16F     | 227.1231 | 3.0       | n.a.   | 1 | 100.00 | 8.5   | even |     |      | ok     |

7.50  
7.50  
7.49  
7.48  
7.46  
7.44  
7.42  
7.37  
7.36  
7.35  
7.34  
7.32  
7.31  
7.15  
7.12  
6.47  
6.44  
5.73  
5.72  
5.62  
5.61

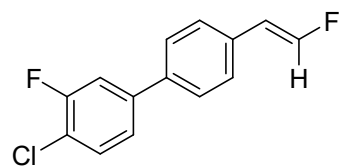

<sup>1</sup>H NMR  
(400 MHz, CDCl<sub>3</sub>)

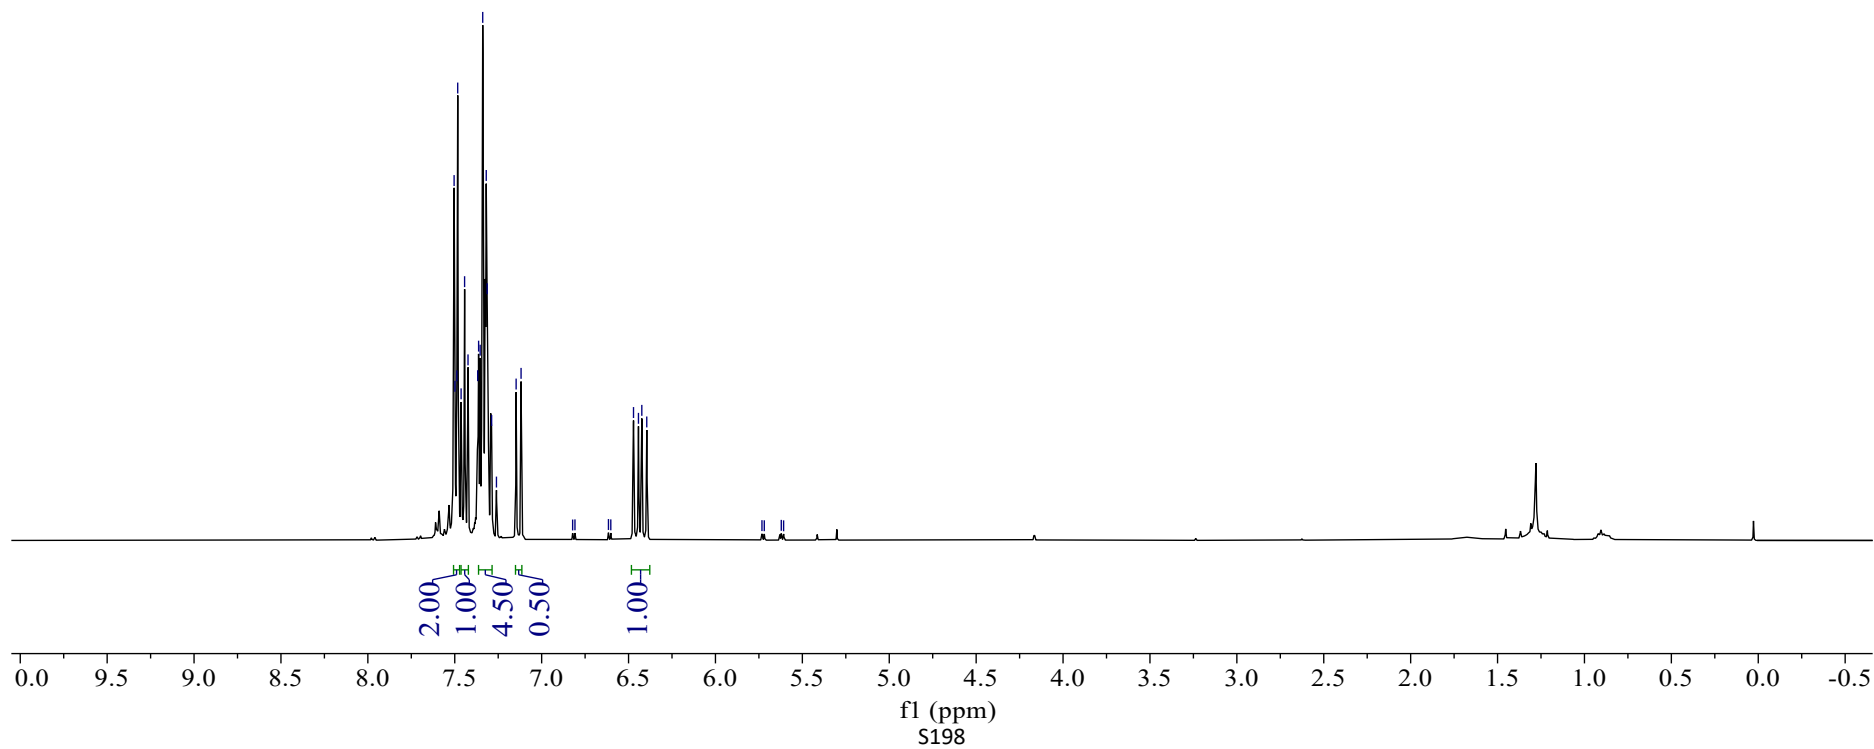

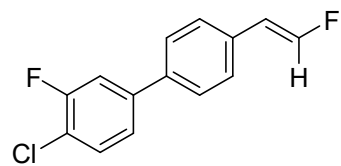

$^{13}\text{C}$  NMR  
(101 MHz,  $\text{CDCl}_3$ )

159.71  
157.24  
149.36  
138.04  
127.35  
123.22  
120.03  
115.07  
114.85  
113.55  
113.39  
77.48  
77.16  
76.84

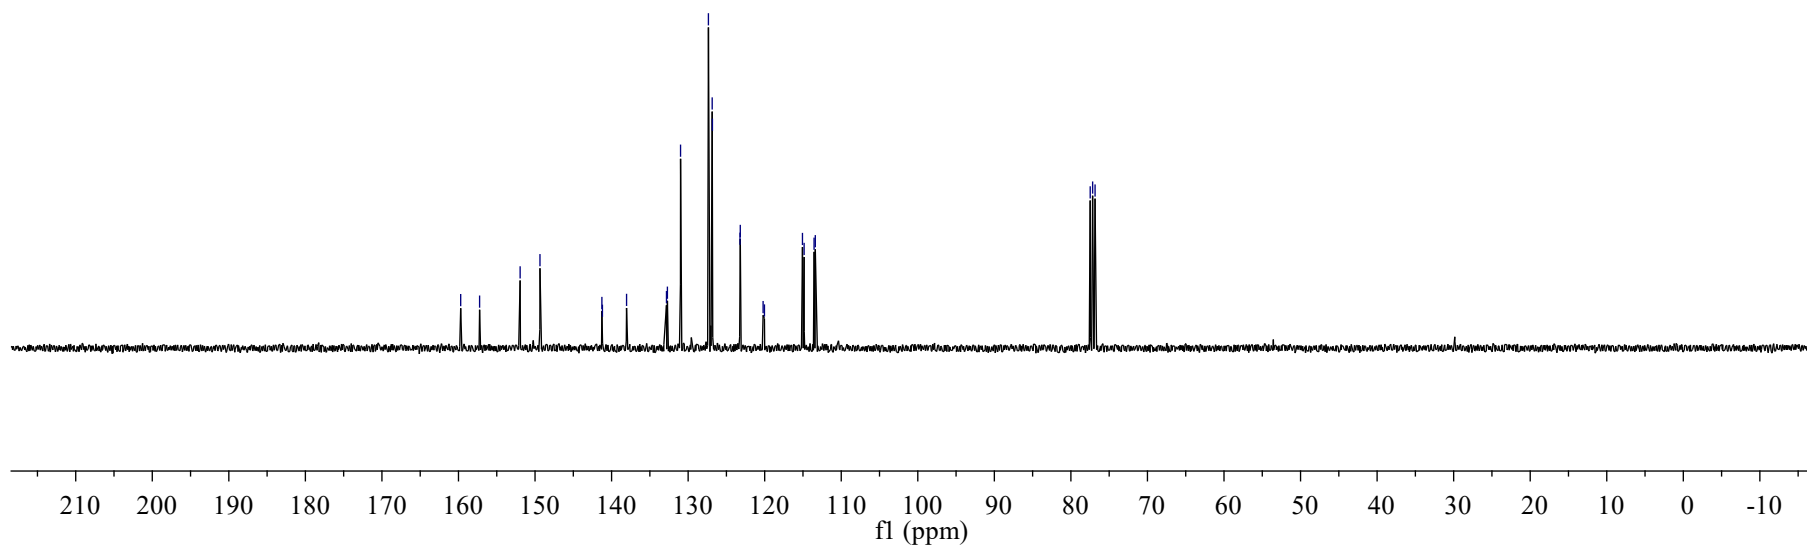

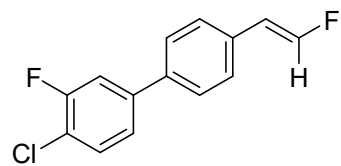

$^{19}\text{F}$  NMR  
(565 MHz,  $\text{CDCl}_3$ )

-115.05  
-115.07  
-115.09  
-120.69  
-120.77  
-120.83  
-120.91  
-128.28  
-128.31  
-128.43  
-128.46

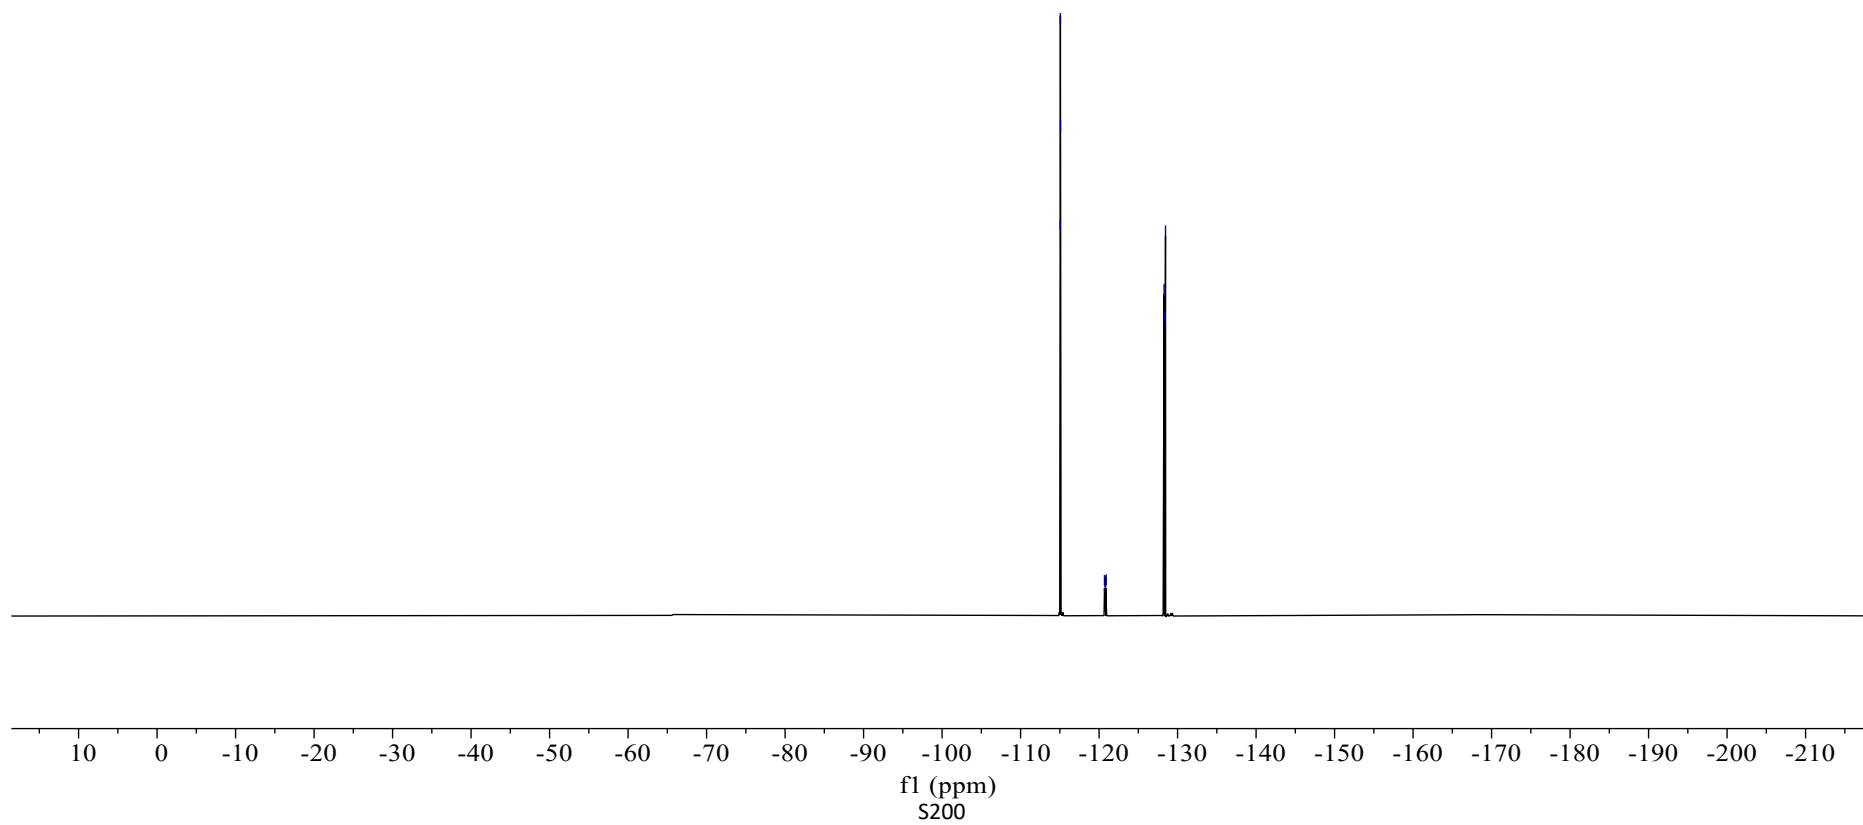

# Mass Spectrum SmartFormula Report

## Analysis Info

Analysis Name D:\LXMS\0106\_RB2\_01\_20511.d  
Method LC\_NO UV\_P50-1500\_6MIN.m  
Sample Name 0106

Acquisition D 2023-01-09 9:39:18

Operator Demo User  
Instrument compact 8255754.2017  
6

## Comment

## Acquisition Paramet

|             |            |               |          |                |           |
|-------------|------------|---------------|----------|----------------|-----------|
| Source Type | ESI        | Ion Polarity  | Positive | Set Nebulizer  | 3.0 Bar   |
| Focus       | Not active | Set Capillary | 4000 V   | Set Dry Heater | 200 °C    |
| Scan Begin  | 50 m/z     | Set End Plate | -500 V   | Set Dry Gas    | 8.0 l/min |

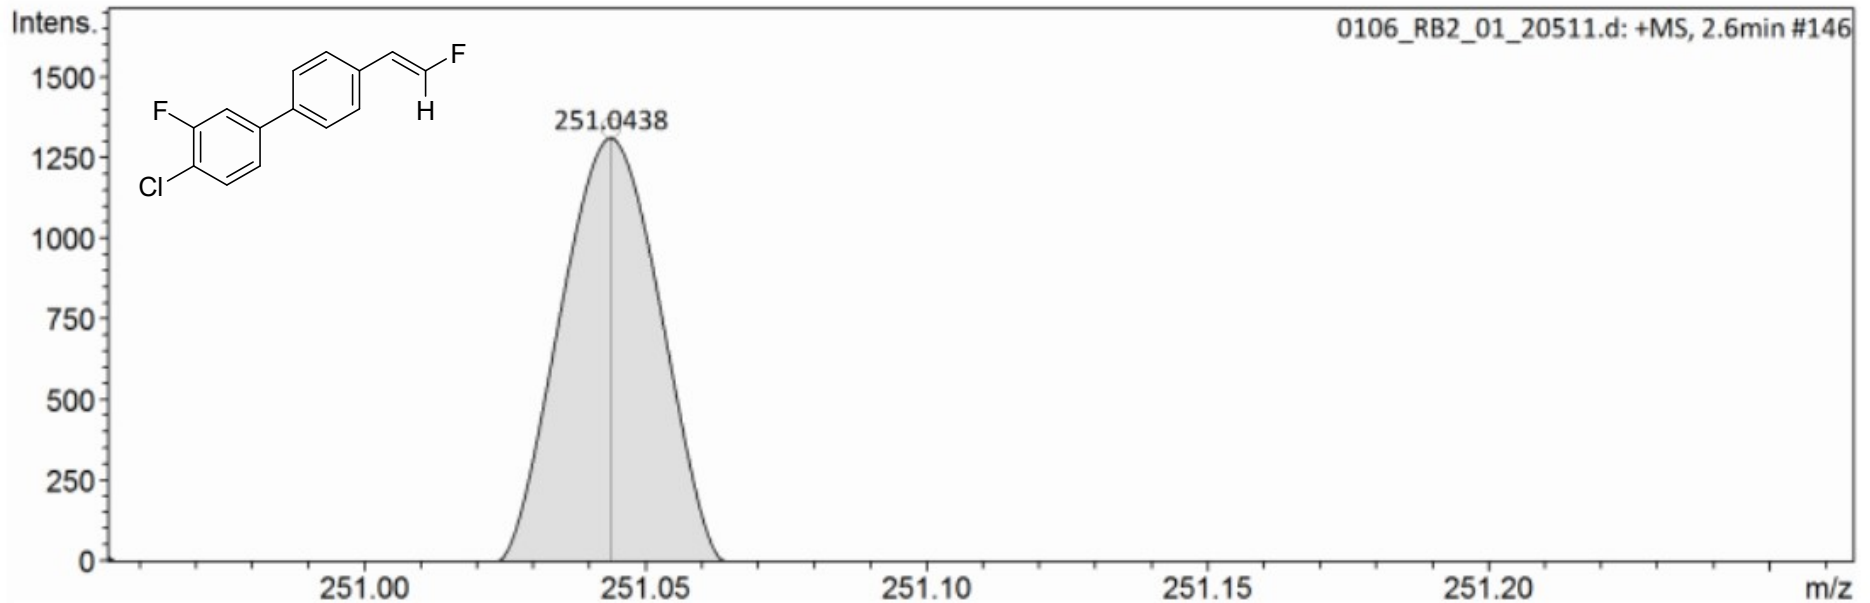

| Meas. m/z | # | Ion Formula | m/z      | err [ppm] | mSigma | # | mSigma | Score | rdb  | e;¥ | Conf | N-Rule |
|-----------|---|-------------|----------|-----------|--------|---|--------|-------|------|-----|------|--------|
| 251.0438  | 1 | C14H10ClF2  | 251.0434 | -1.9      | n.a.   | 1 | 100.00 | 8.5   | even |     |      | ok     |

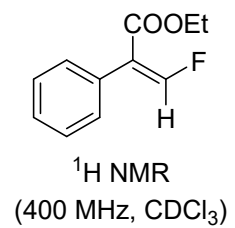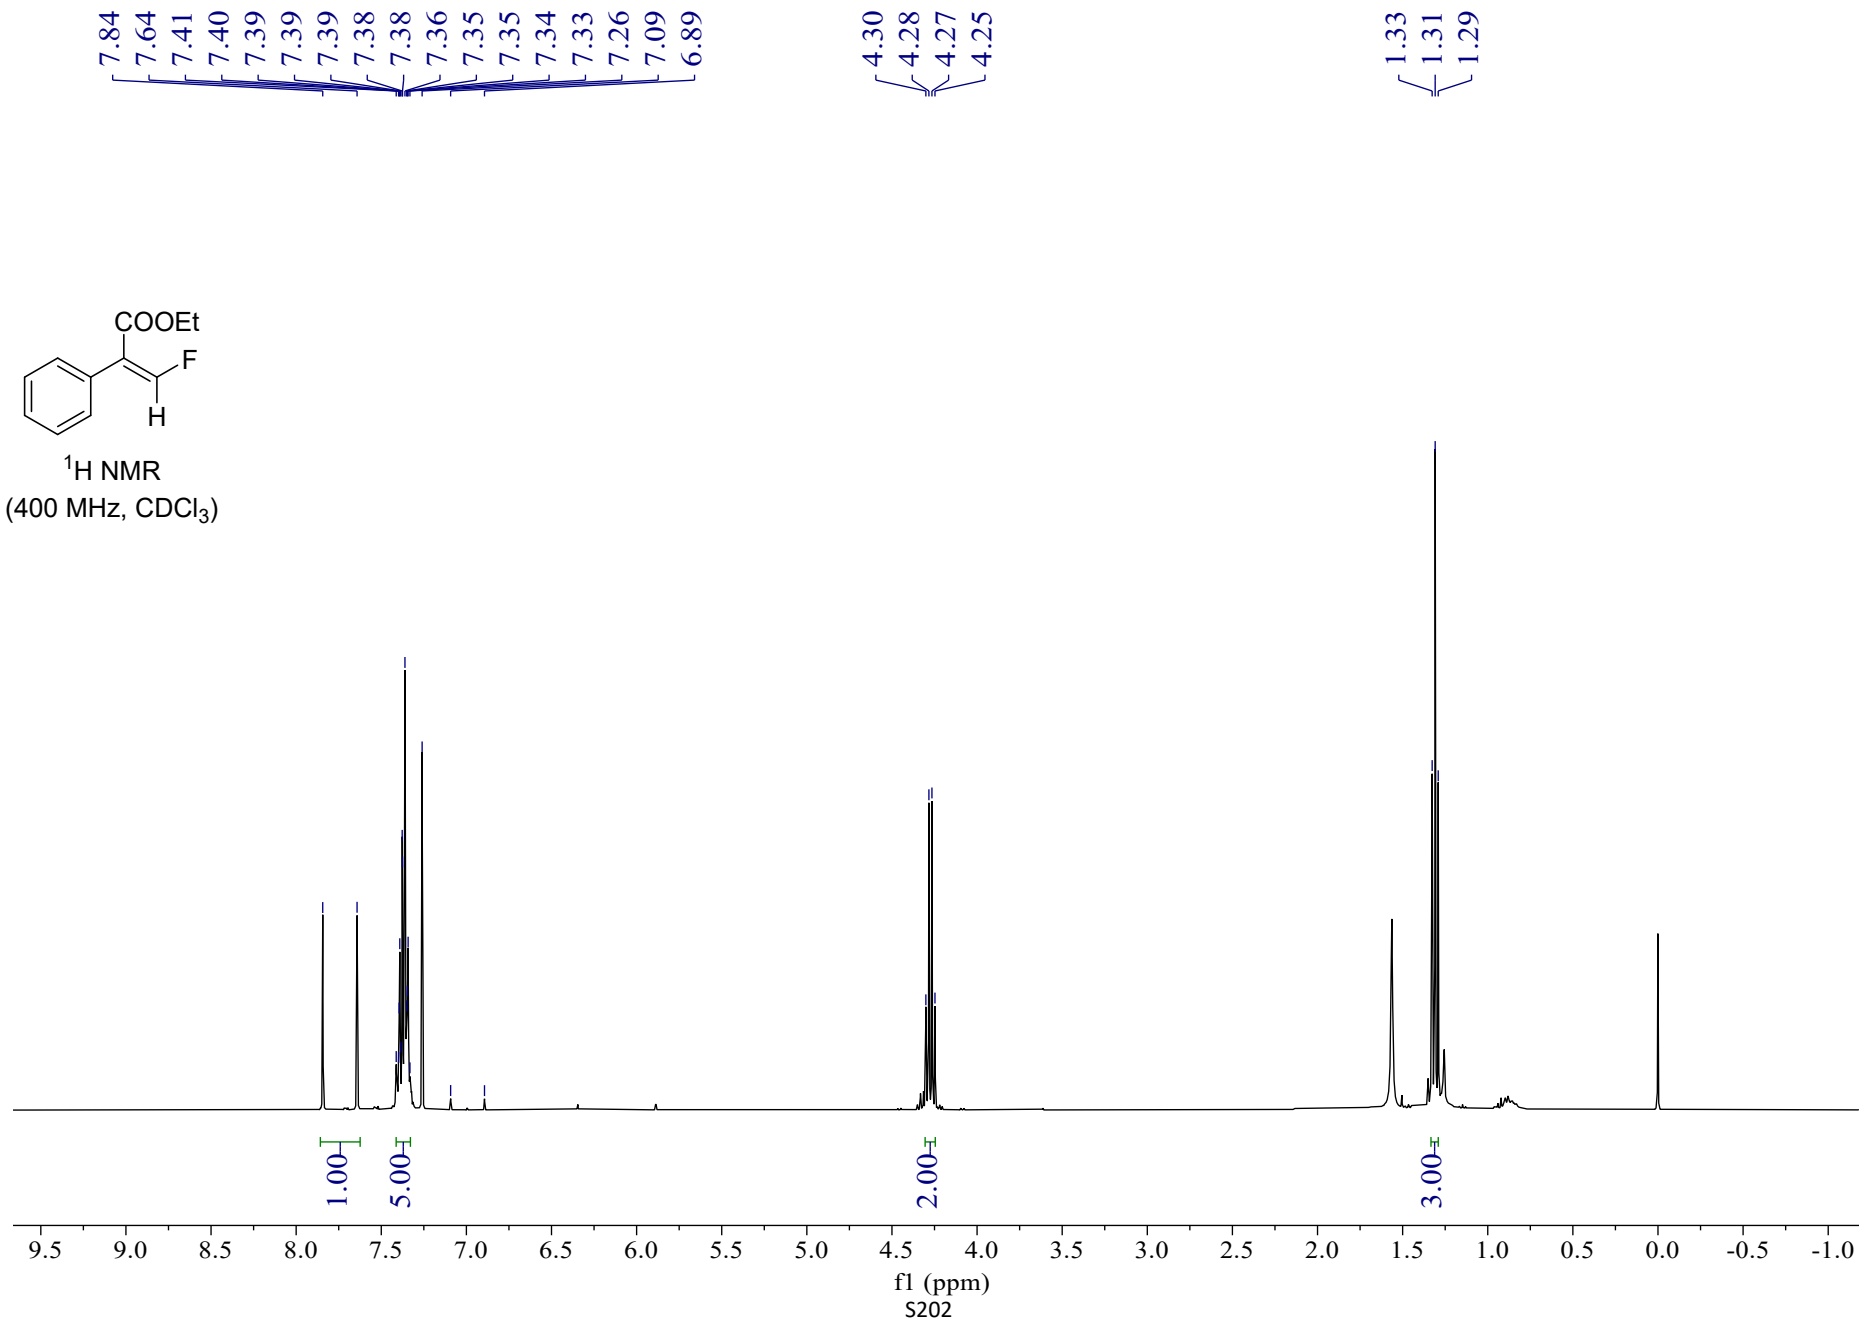

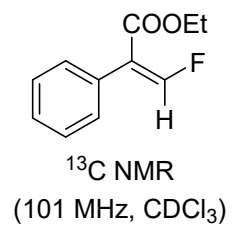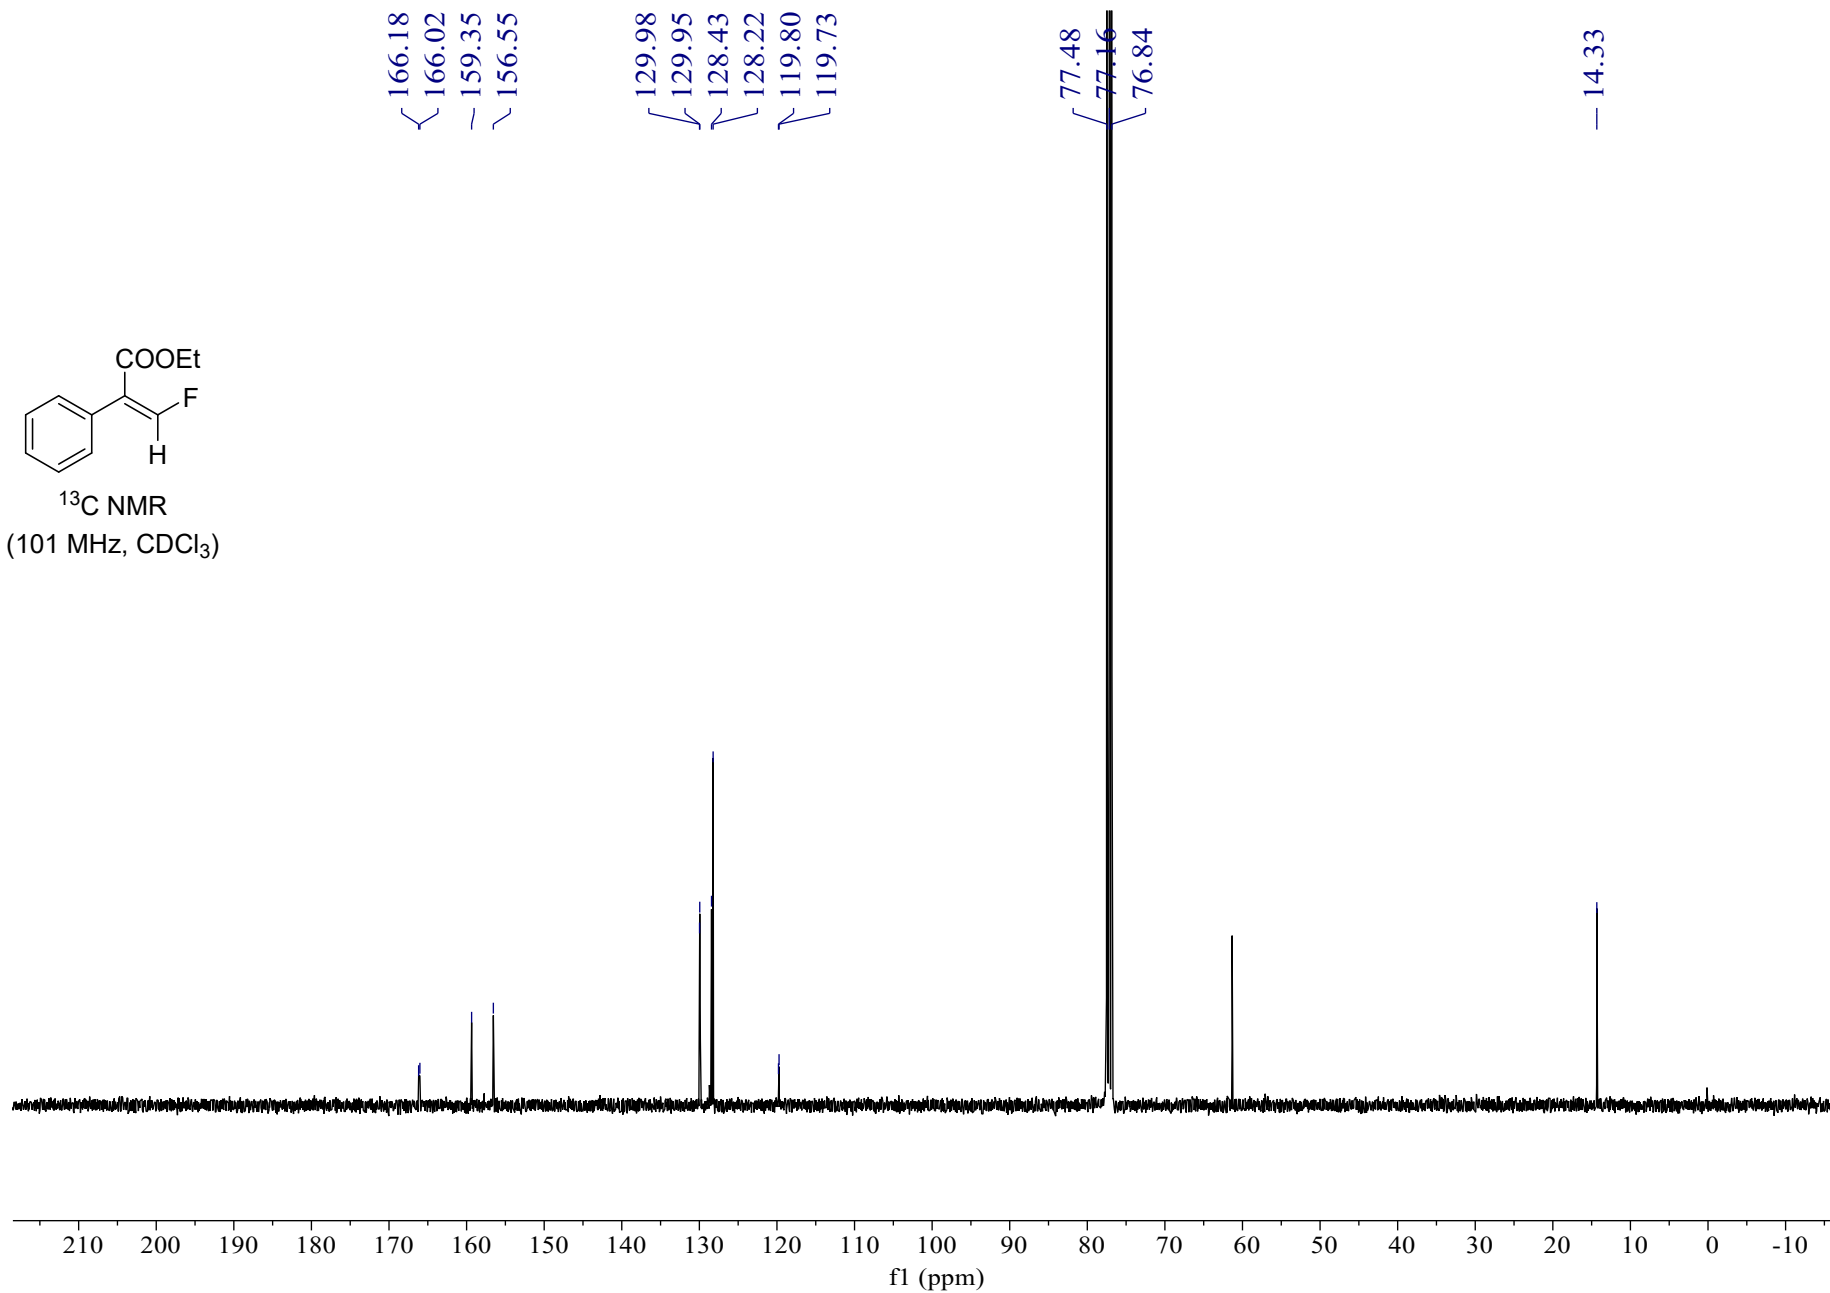

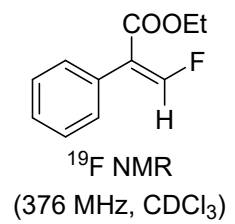

-110.52  
-110.73  
-114.59  
-114.80

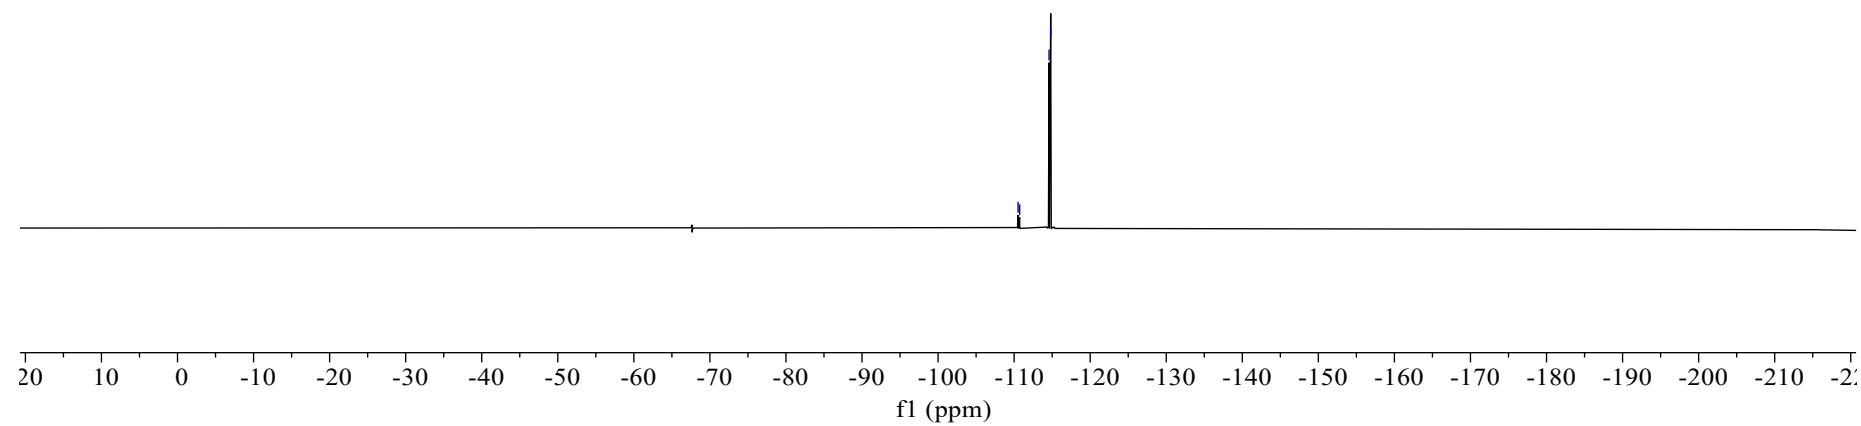



LX-13 #31 RT: 0.23 AV: 1 NL: 6.57E4  
 T: FTMS + p ESI Full ms [100.0000-1500.0000]

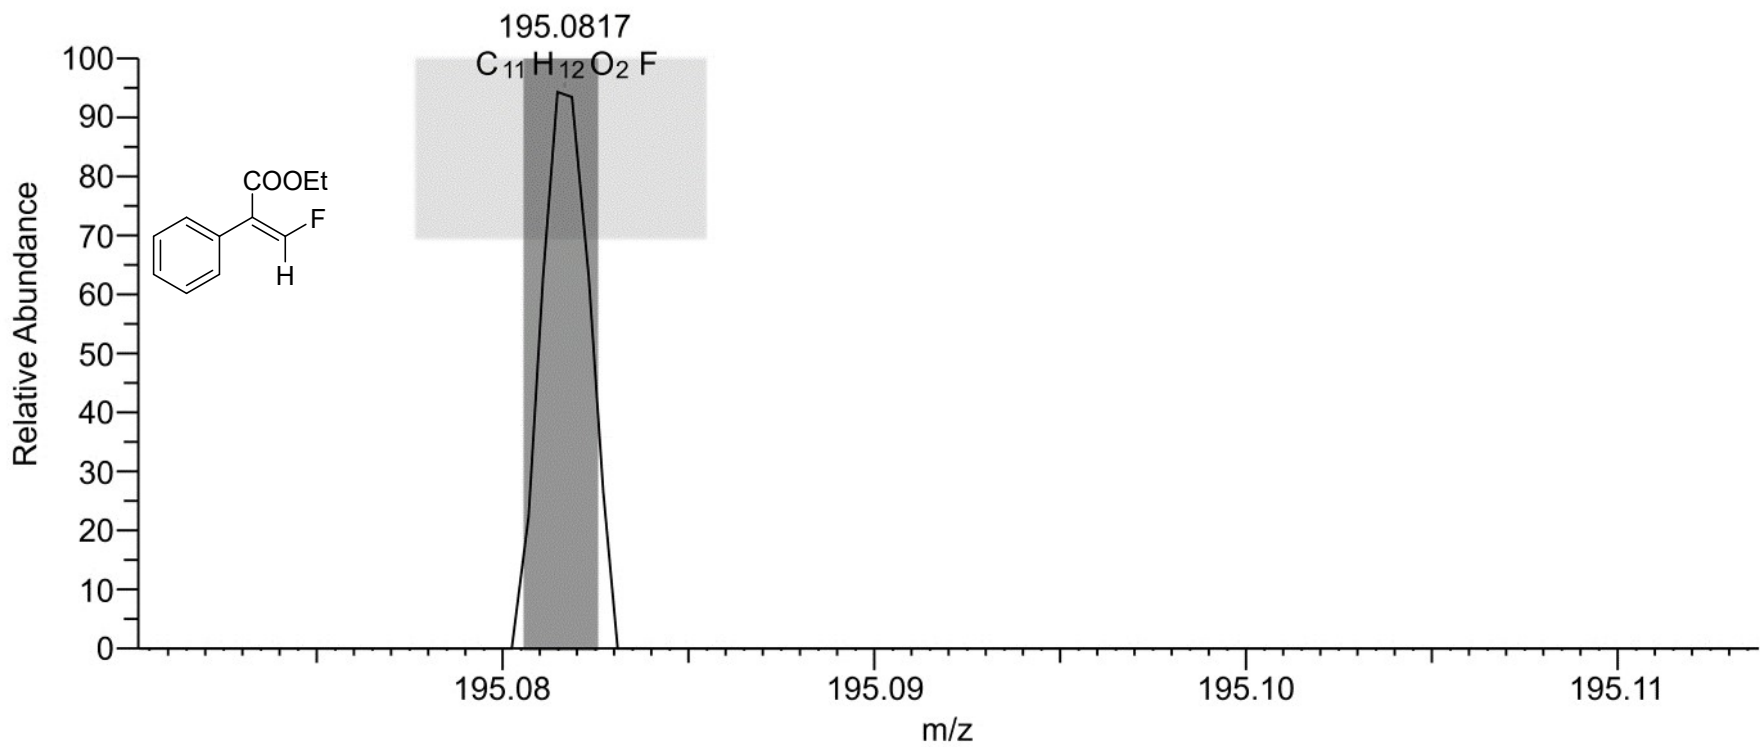

| Peak M...    | Display...         | S Fit                    | RDB  | Delta [p... | Theo....      | Rank | Combin... | # Matc... | # Misse... | MS Cov... | Pattern... | MSMS...          |
|--------------|--------------------|--------------------------|------|-------------|---------------|------|-----------|-----------|------------|-----------|------------|------------------|
| 195.081<br>7 | $C_{11}H_{12}O_2F$ | 90.8328<br>105712<br>394 | 5.50 | 0.65        | 195.081<br>58 | 1    | 99.52     | 1         | 0          | 100       | 100        | (Collect<br>ion) |

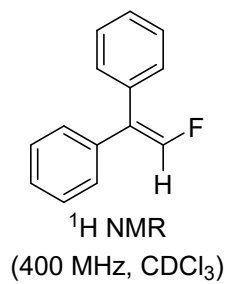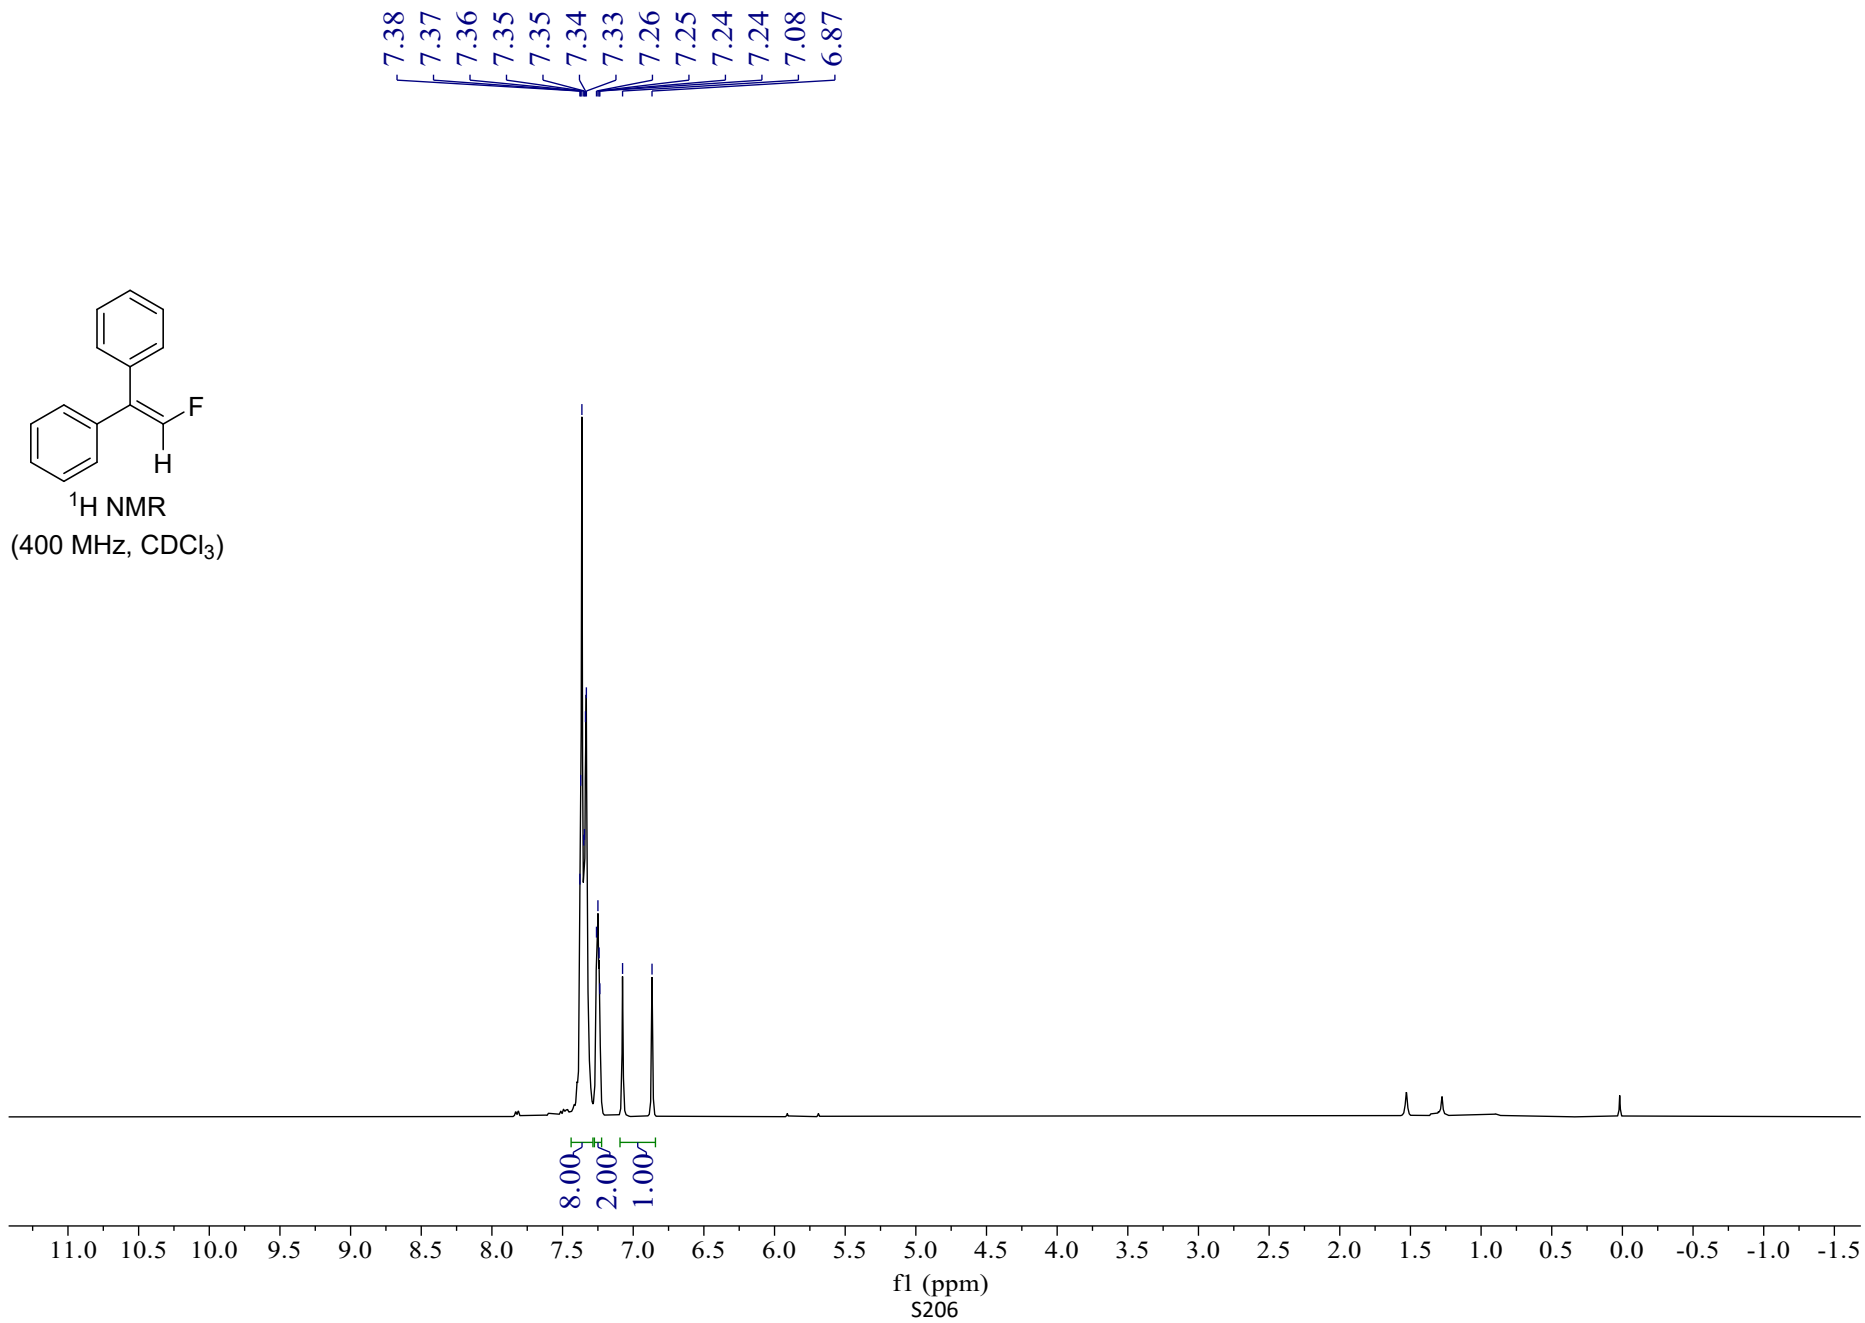

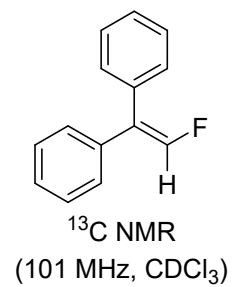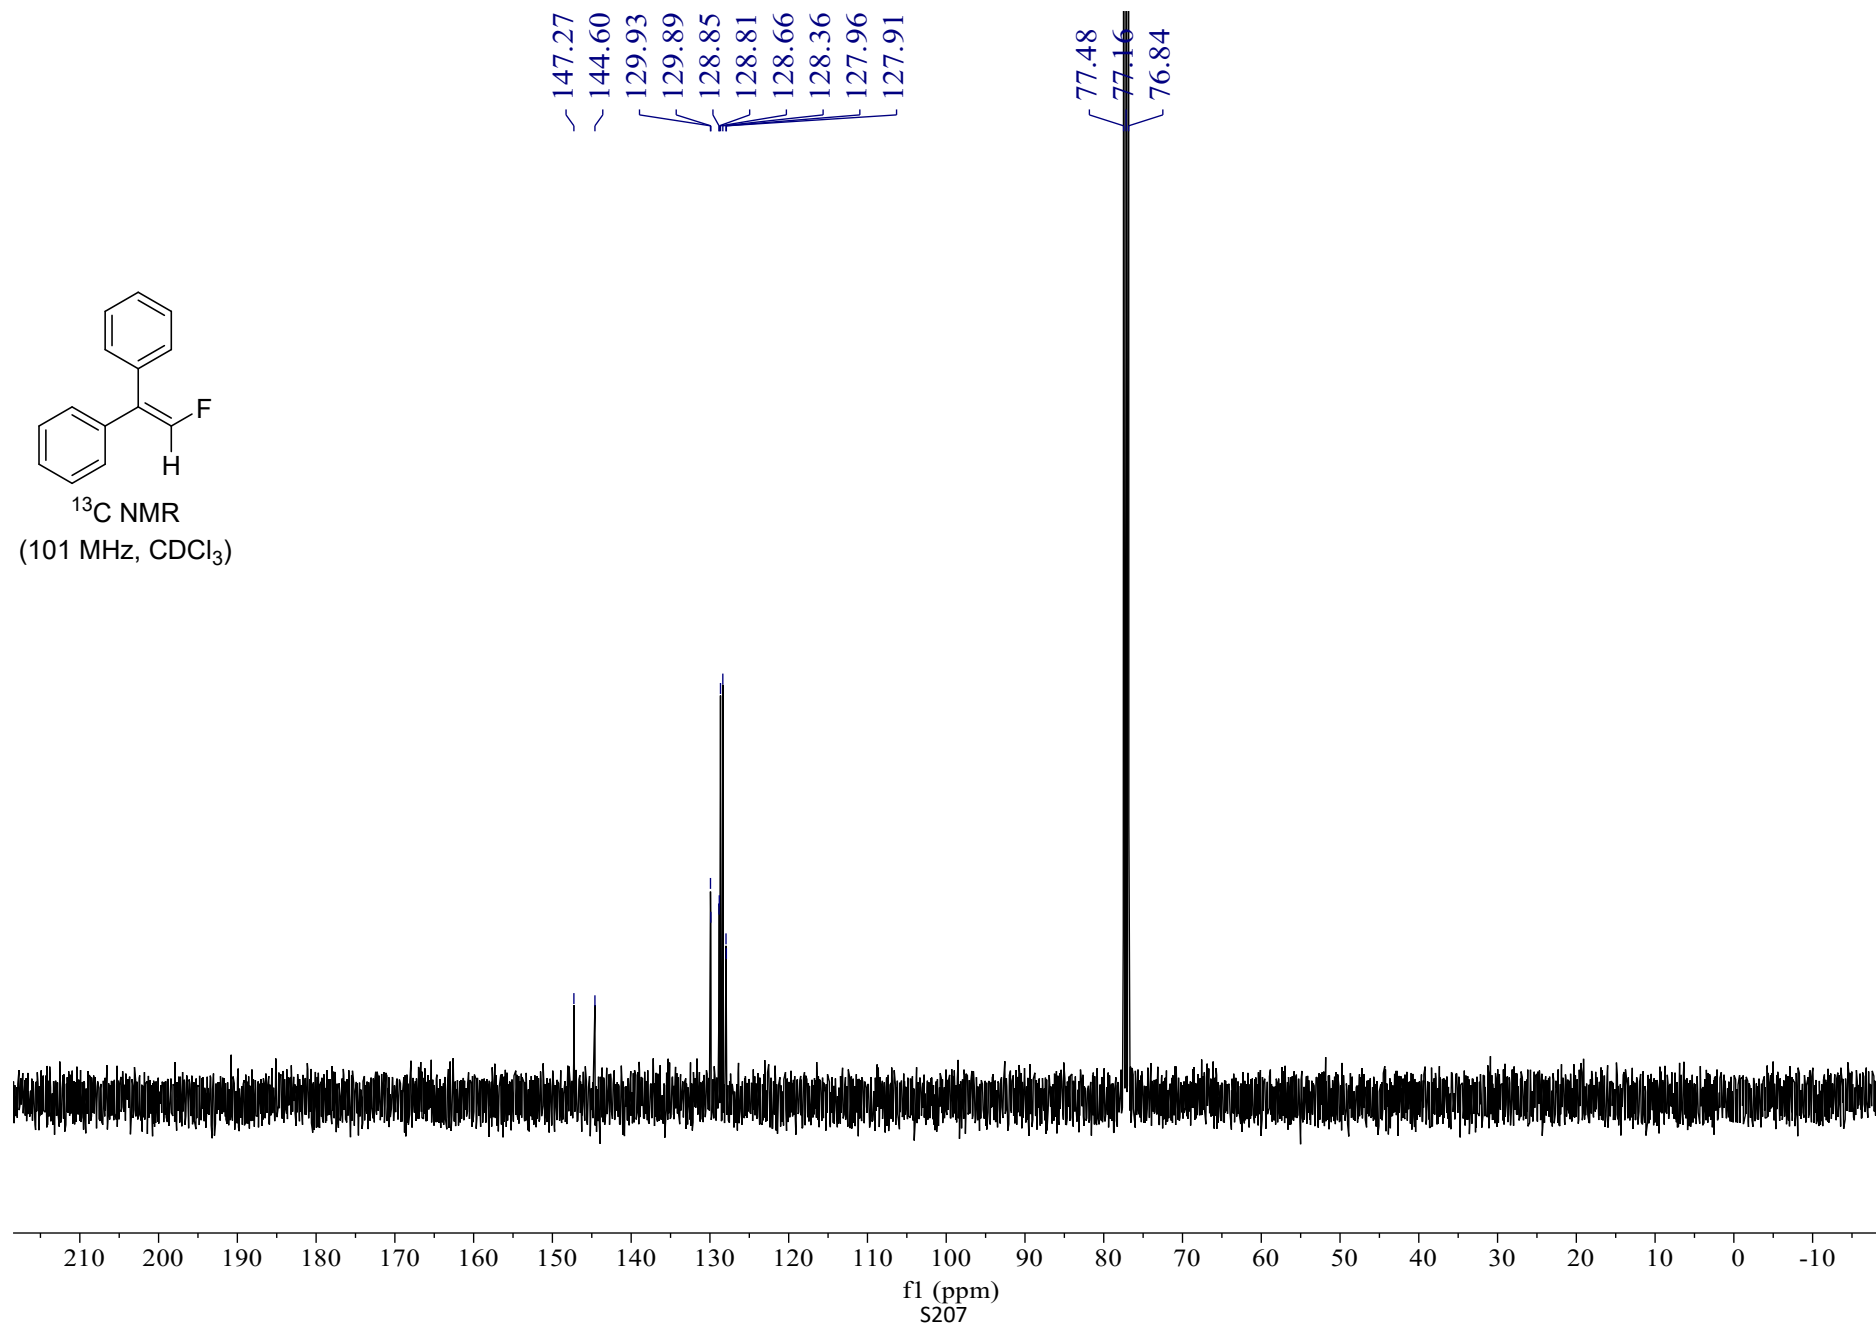

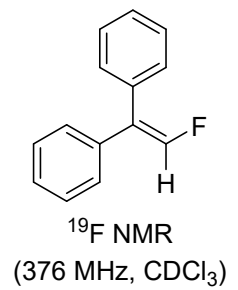

{ -127.91  
-128.13

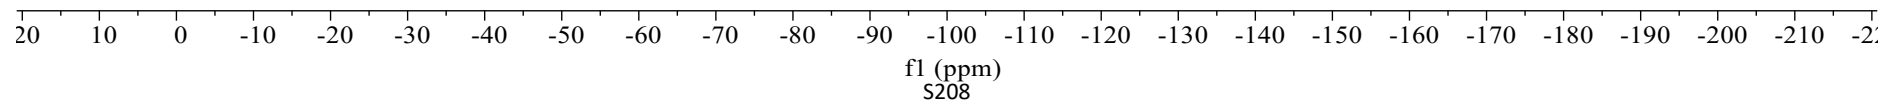

f1 (ppm)  
S208

# Mass Spectrum SmartFormula Report

## Analysis Info

Analysis Name D:\LXMS\0306\_BC1\_01\_22065.d  
Method LC\_NO UV\_P50-1500\_10MIN.m  
Sample Name 0306

Acquisition D 2023-03-10 15:59:10

Operator Demo User  
Instrument compact 8255754.2017  
6

## Comment

## Acquisition Paramet

|             |            |               |          |                |           |
|-------------|------------|---------------|----------|----------------|-----------|
| Source Type | ESI        | Ion Polarity  | Positive | Set Nebulizer  | 3.0 Bar   |
| Focus       | Not active | Set Capillary | 4000 V   | Set Dry Heater | 200 °C    |
| Scan Begin  | 50 m/z     | Set End Plate | -500 V   | Set Dry Gas    | 8.0 l/min |

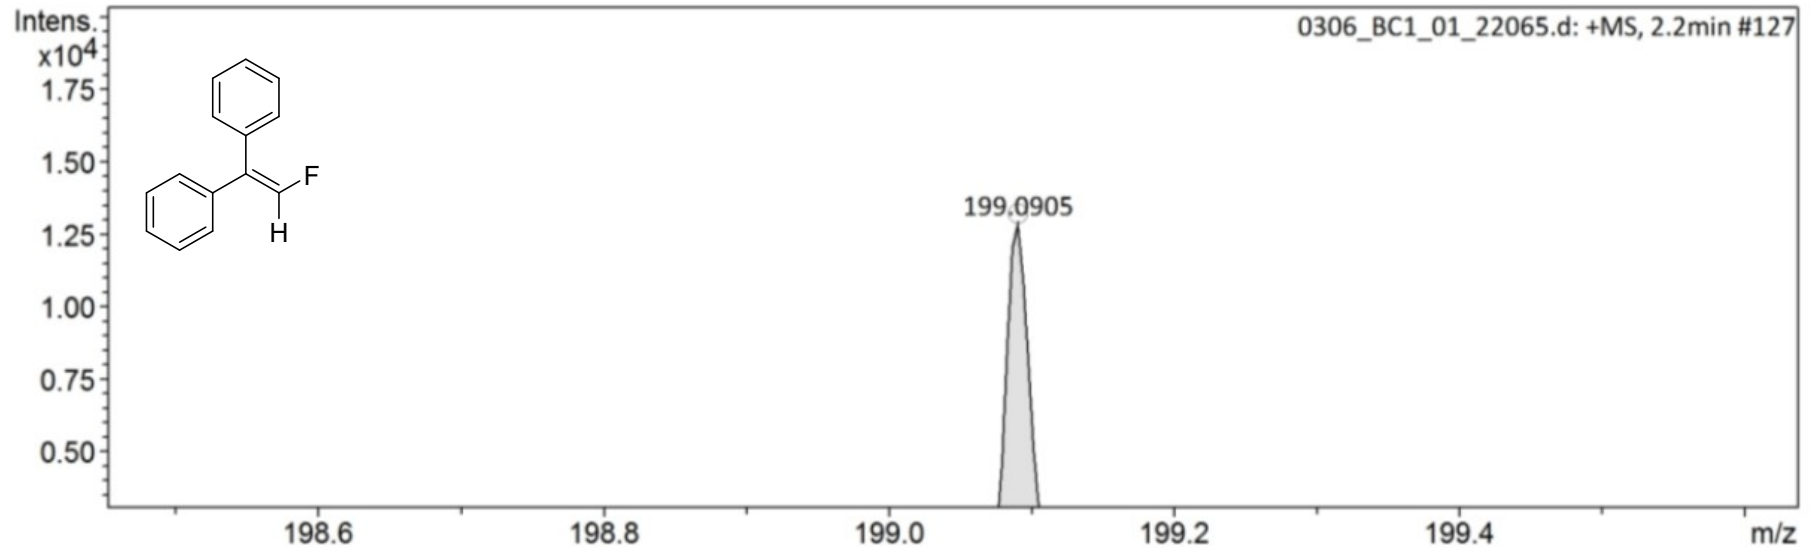

| Meas. m/z | # | Ion Formula | m/z      | err [ppm] | mSigma | # | mSigma | Score | rdb  | e;Y | Conf | N-Rule |
|-----------|---|-------------|----------|-----------|--------|---|--------|-------|------|-----|------|--------|
| 199.0905  | 1 | C14H12F     | 199.0918 | 6.2       | n.a.   | 1 | 100.00 | 8.5   | even |     |      | ok     |

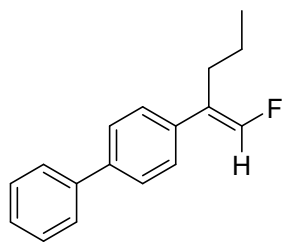

$^1\text{H}$  NMR  
(400 MHz,  $\text{CDCl}_3$ )

7.60  
7.59  
7.58  
7.56  
7.46  
7.45  
7.43  
7.37  
7.35  
7.26  
6.98  
6.76

2.59  
2.58  
2.57  
2.56  
2.55  
2.54  
1.50  
1.48  
1.46  
1.45  
1.43  
1.41  
0.95  
0.93  
0.91

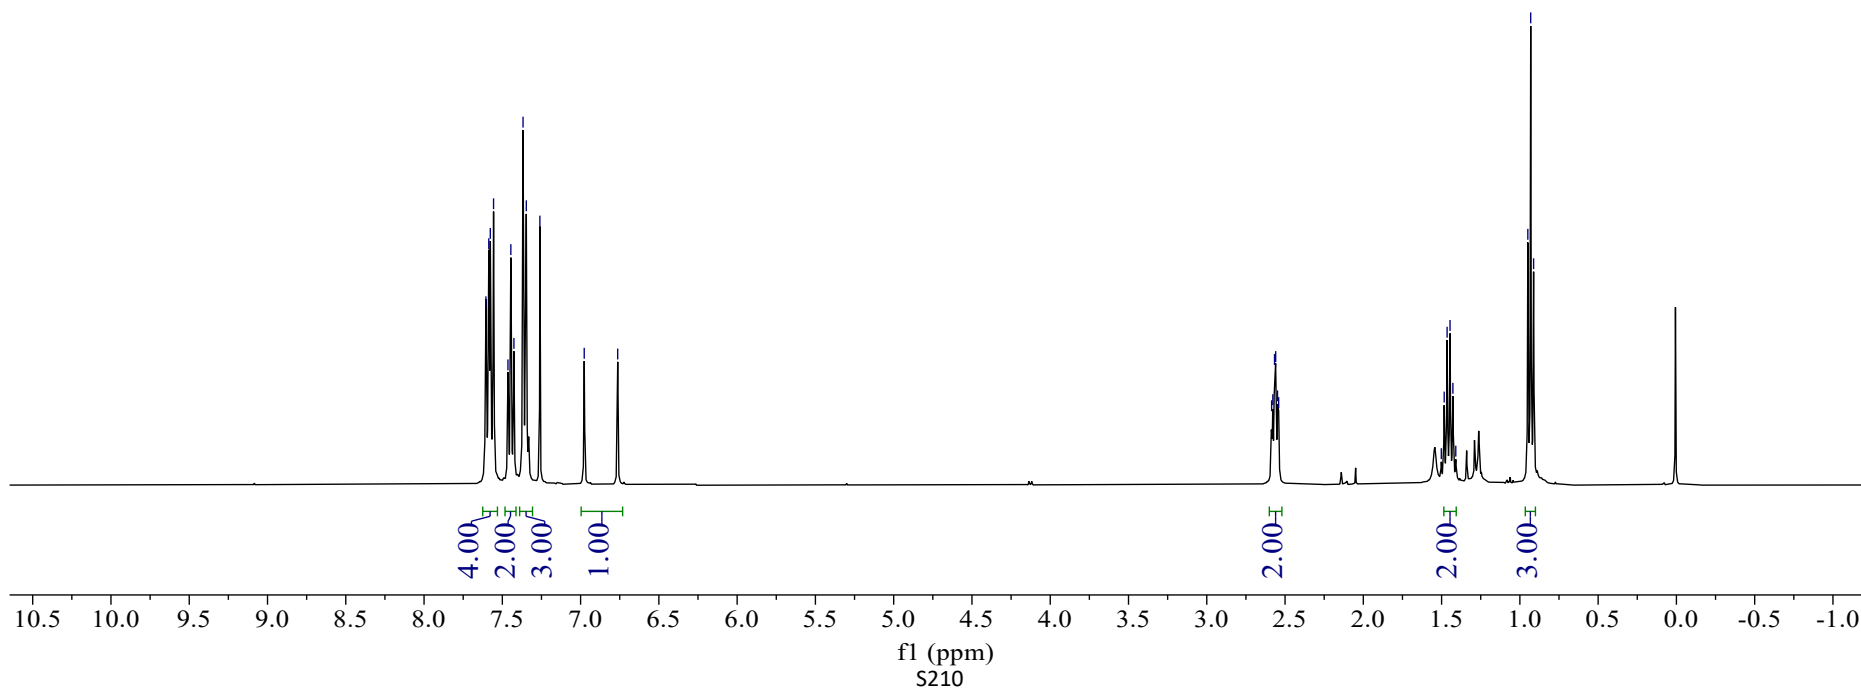

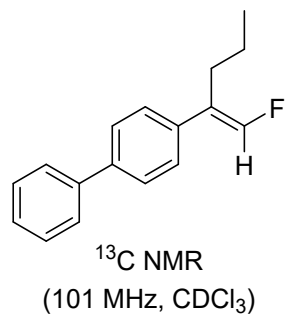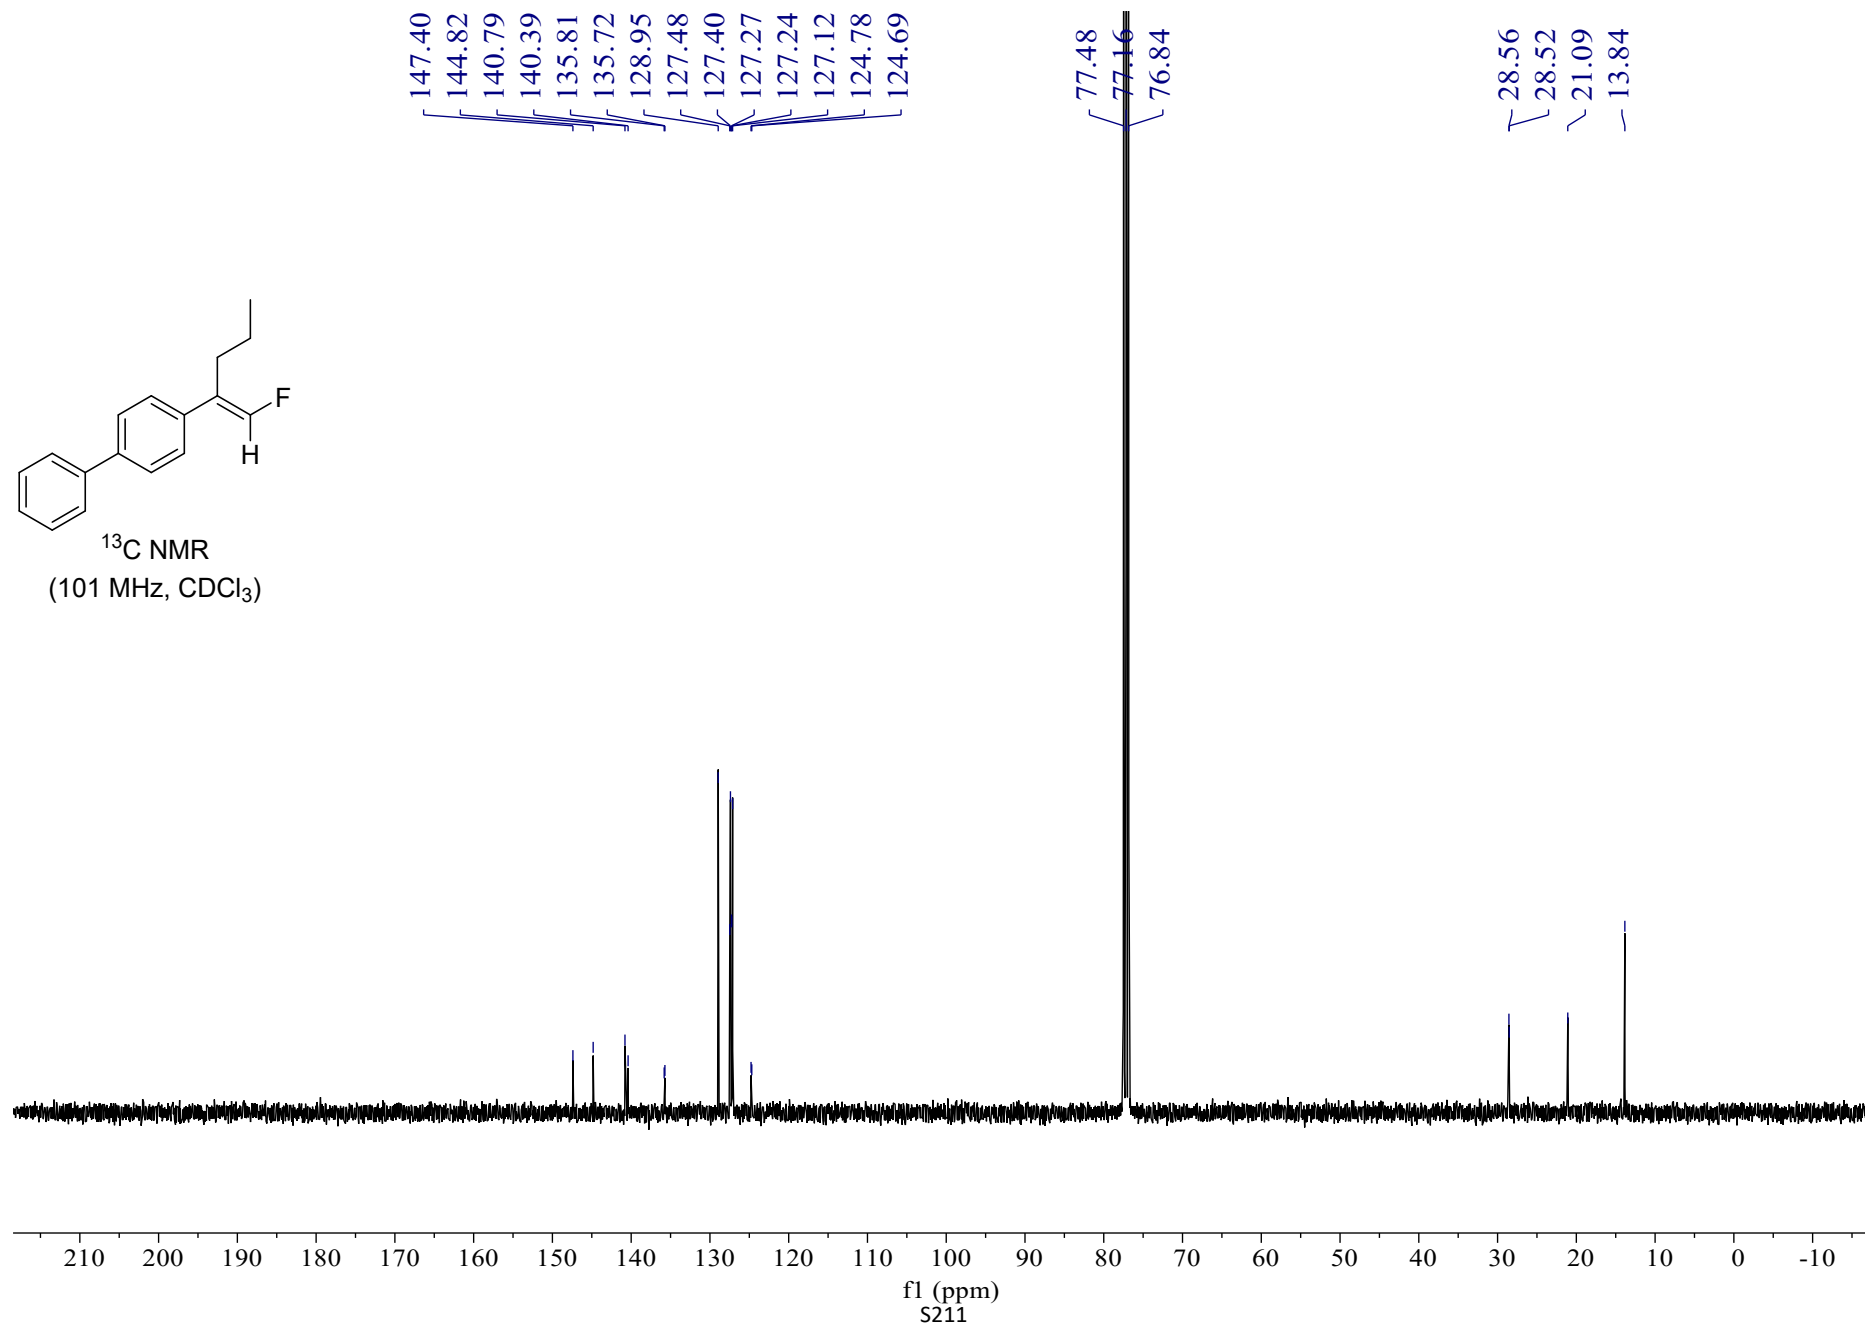

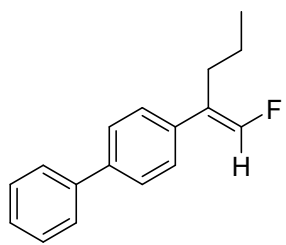

$^{19}\text{F}$  NMR  
(376 MHz,  $\text{CDCl}_3$ )

-130.95  
-130.96  
-130.96  
-131.17  
-131.18  
-131.19

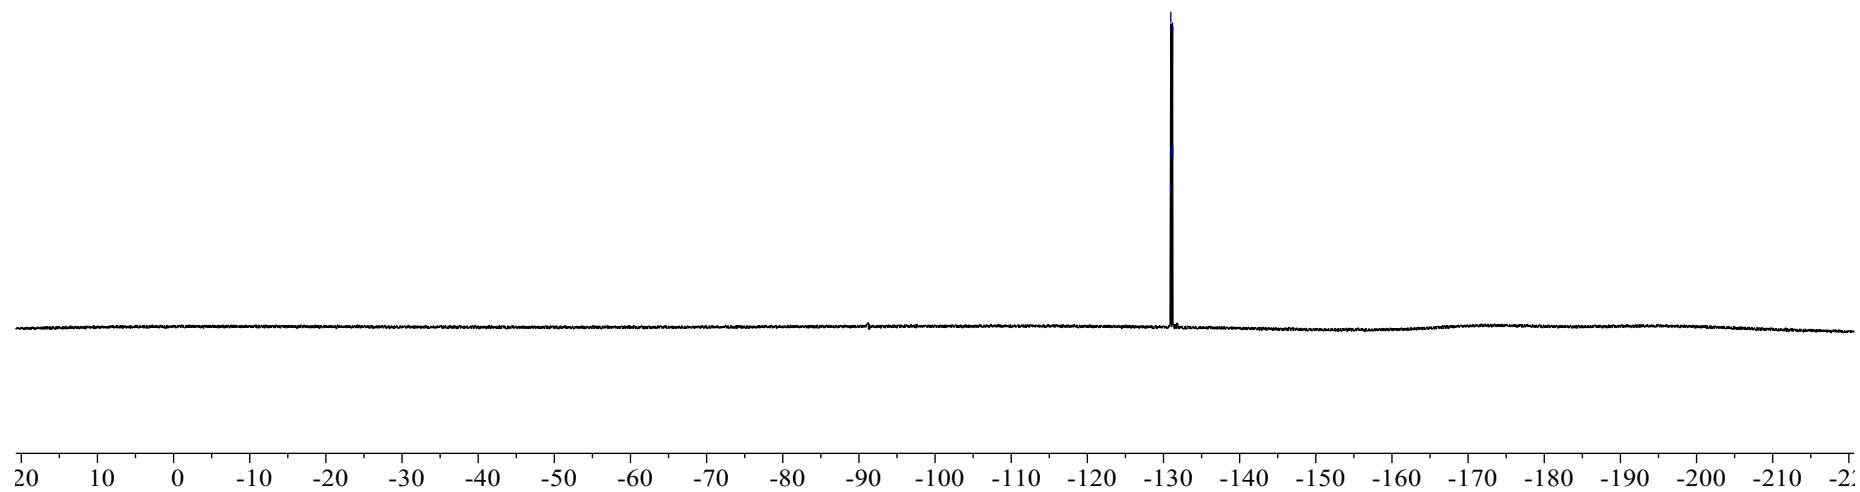



# Mass Spectrum SmartFormula Report

## Analysis Info

Analysis Name D:\LXMS\0306\_BC2\_01\_22066.d  
Method LC\_NO UV\_P50-1500\_10MIN.m  
Sample Name 0306

Acquisition D 2023-03-10 16:11:02

Operator Demo User  
Instrument compact 8255754.2017  
6

## Comment

## Acquisition Paramet

|             |            |               |          |                |           |
|-------------|------------|---------------|----------|----------------|-----------|
| Source Type | ESI        | Ion Polarity  | Positive | Set Nebulizer  | 3.0 Bar   |
| Focus       | Not active | Set Capillary | 4000 V   | Set Dry Heater | 200 °C    |
| Scan Begin  | 50 m/z     | Set End Plate | -500 V   | Set Dry Gas    | 8.0 l/min |

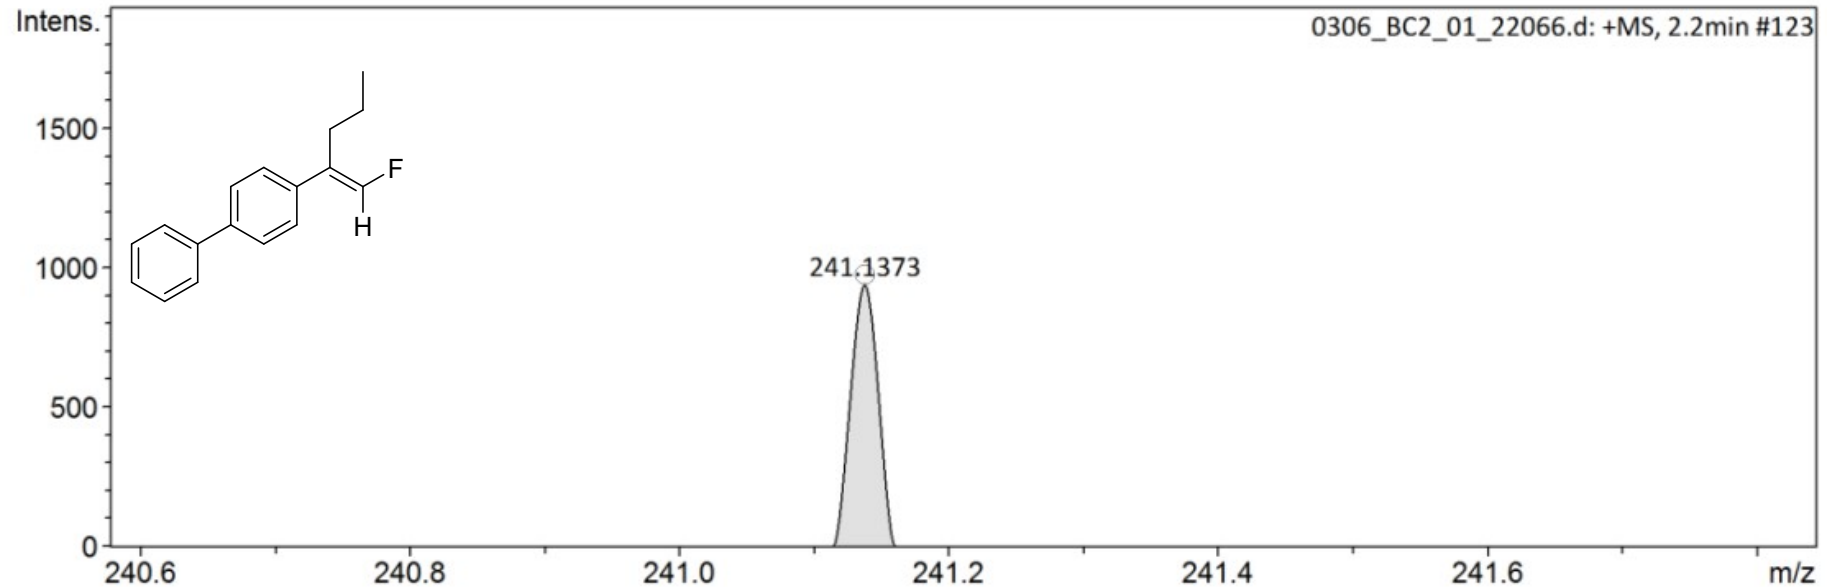

| Meas. m/z | # | Ion Formula | m/z      | err [ppm] | mSigma | # | mSigma | Score | rdb  | e;¥ | Conf | N-Rule |
|-----------|---|-------------|----------|-----------|--------|---|--------|-------|------|-----|------|--------|
| 241.1373  | 1 | C17H18F     | 241.1387 | 5.7       | n.a.   | 1 | 100.00 | 8.5   | even |     |      | ok     |

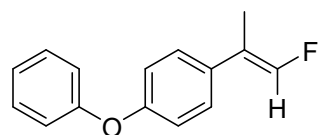

$^1\text{H NMR}$   
(400 MHz,  $\text{CD}_2\text{Cl}_2$ )

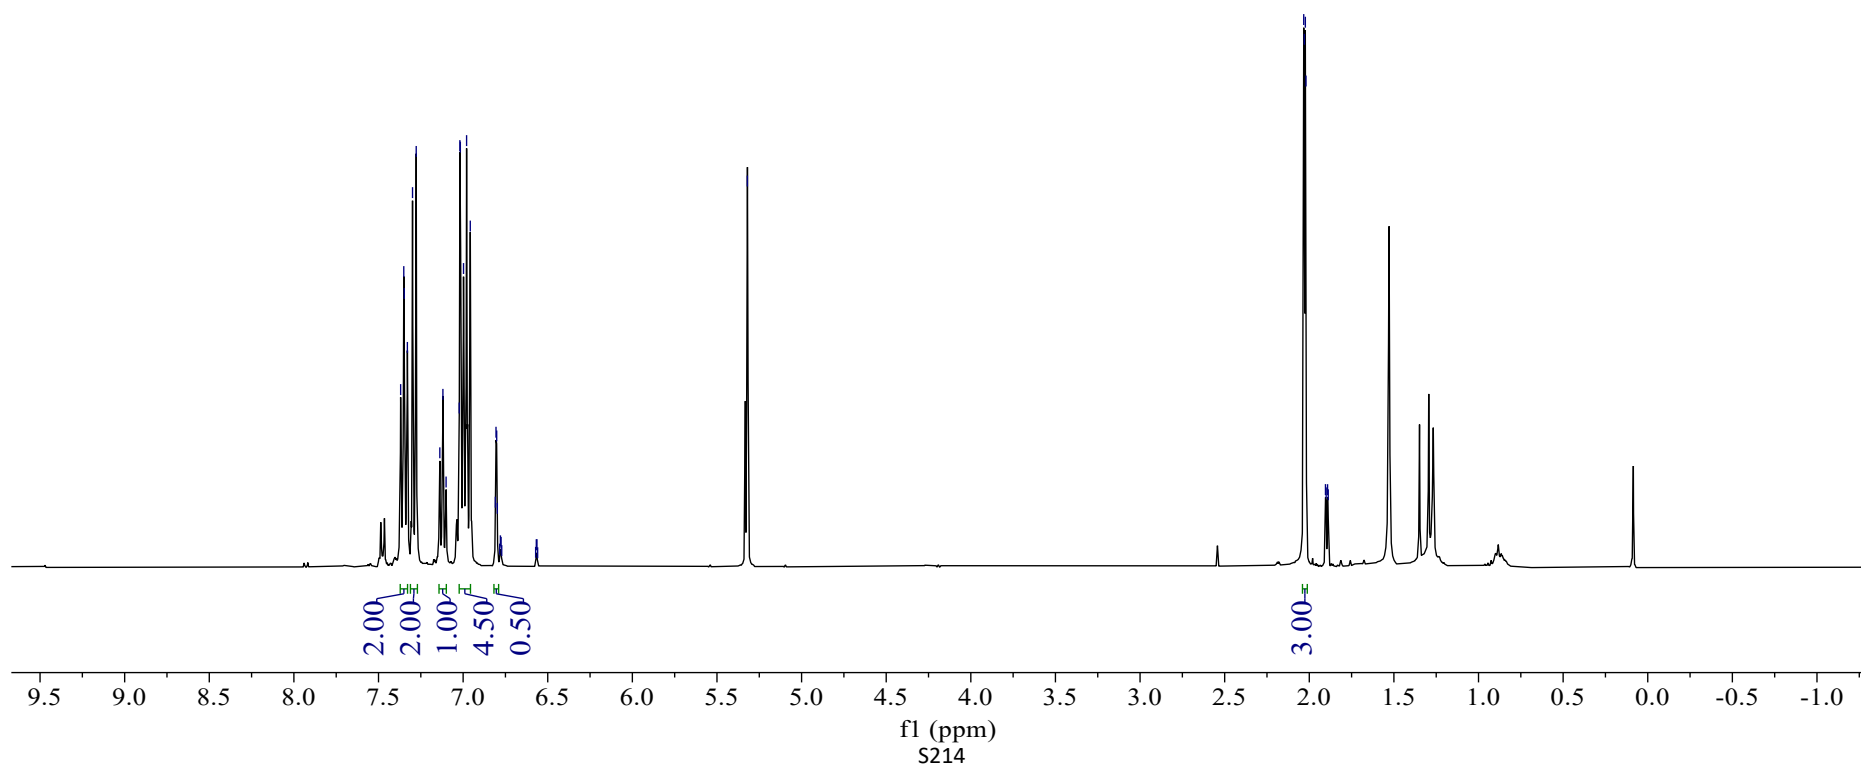

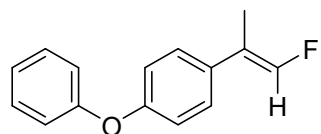

<sup>13</sup>C NMR  
(151 MHz, CD<sub>2</sub>Cl<sub>2</sub>)

157.54  
157.16  
146.95  
145.25  
132.93  
132.87  
130.20  
127.62  
127.60  
123.80  
119.27  
119.20

54.20  
54.02  
53.84  
53.66  
53.48

12.44  
12.41

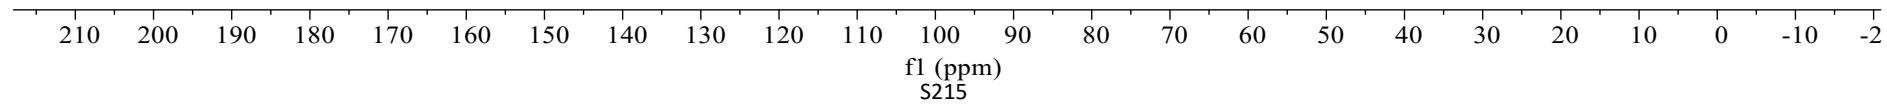

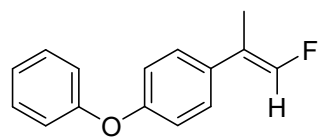

<sup>19</sup>F NMR  
(376 MHz, CDCl<sub>3</sub>)

-129.23  
-129.24  
-129.25  
-129.27  
-129.45  
-129.46  
-129.48  
-129.49  
-131.61  
-131.62  
-131.63  
-131.64  
-131.84  
-131.85  
-131.86  
-131.87

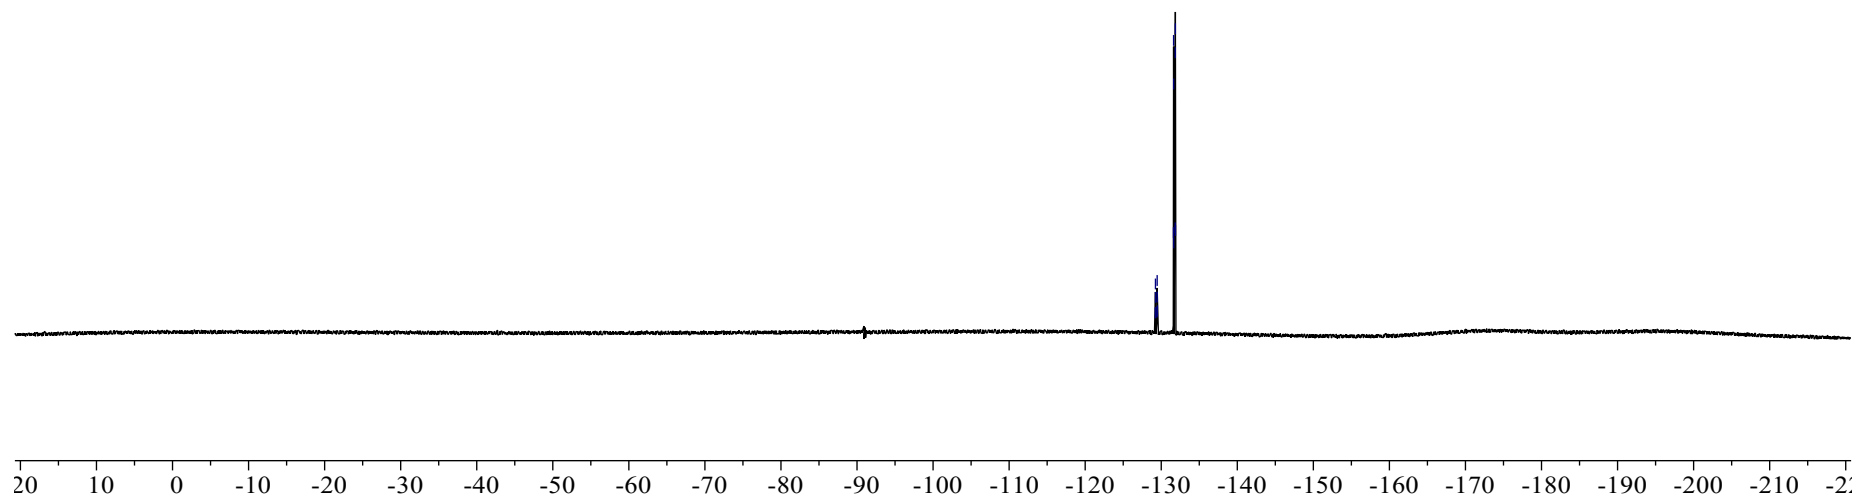

# Mass Spectrum SmartFormula Report

## Analysis Info

Analysis Name D:\LXMS\0306\_BC3\_01\_22067.d  
Method LC\_NO UV\_P50-1500\_10MIN.m  
Sample Name 0306

Acquisition D 2023-03-10 16:23:17  
Operator Demo User  
Instrument compact 8255754.2017  
6

## Comment

## Acquisition Paramet

|             |            |               |          |                |           |
|-------------|------------|---------------|----------|----------------|-----------|
| Source Type | ESI        | Ion Polarity  | Positive | Set Nebulizer  | 3.0 Bar   |
| Focus       | Not active | Set Capillary | 4000 V   | Set Dry Heater | 200 °C    |
| Scan Begin  | 50 m/z     | Set End Plate | -500 V   | Set Dry Gas    | 8.0 l/min |

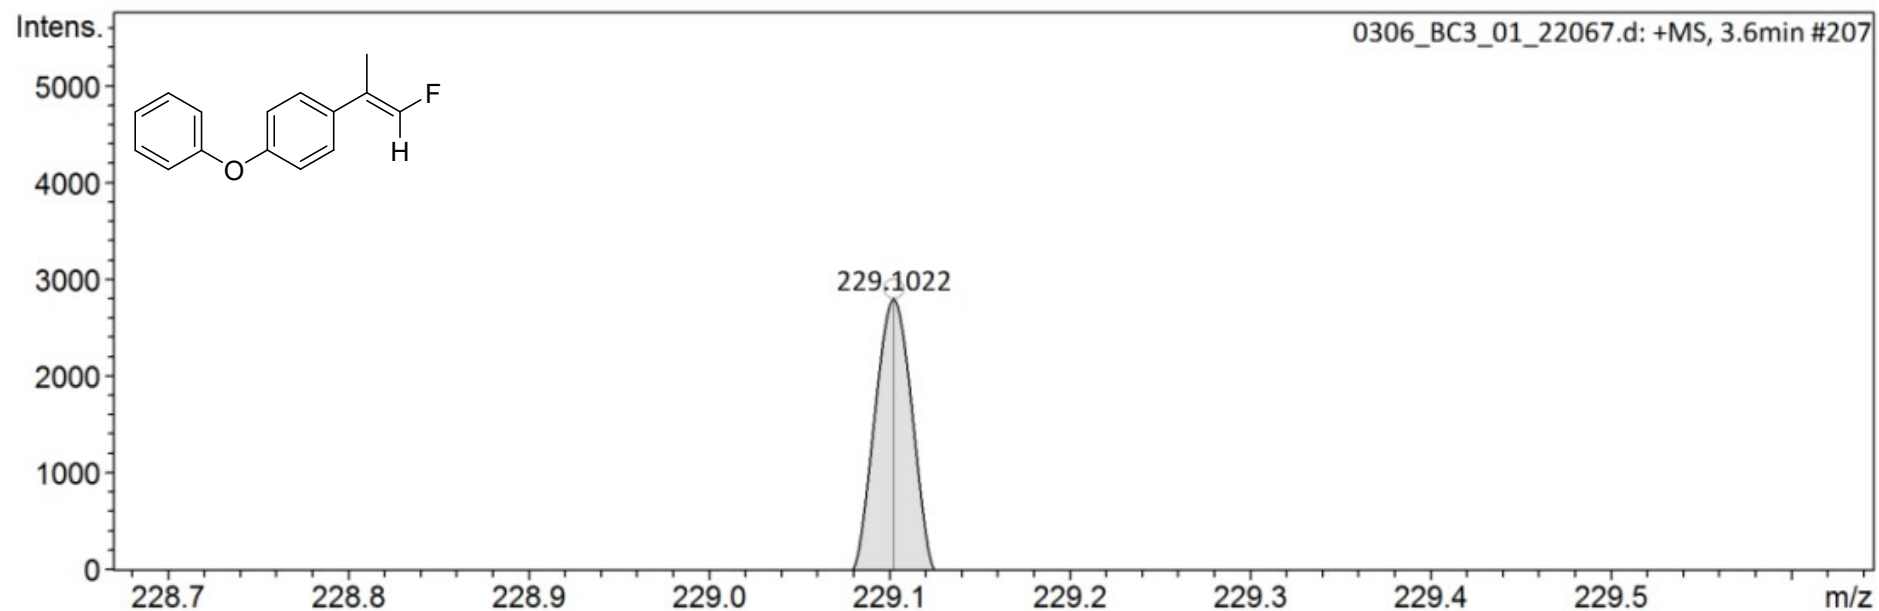

| Meas. m/z | # | Ion Formula | m/z      | err [ppm] | mSigma | # | mSigma | Score | rdb  | e;¥ | Conf | N-Rule |
|-----------|---|-------------|----------|-----------|--------|---|--------|-------|------|-----|------|--------|
| 229.1022  | 1 | C15H14FO    | 229.1023 | 0.6       | n.a.   | 1 | 100.00 | 8.5   | even |     |      | ok     |

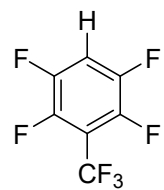

<sup>19</sup>F NMR  
(376 MHz, d-DMSO)

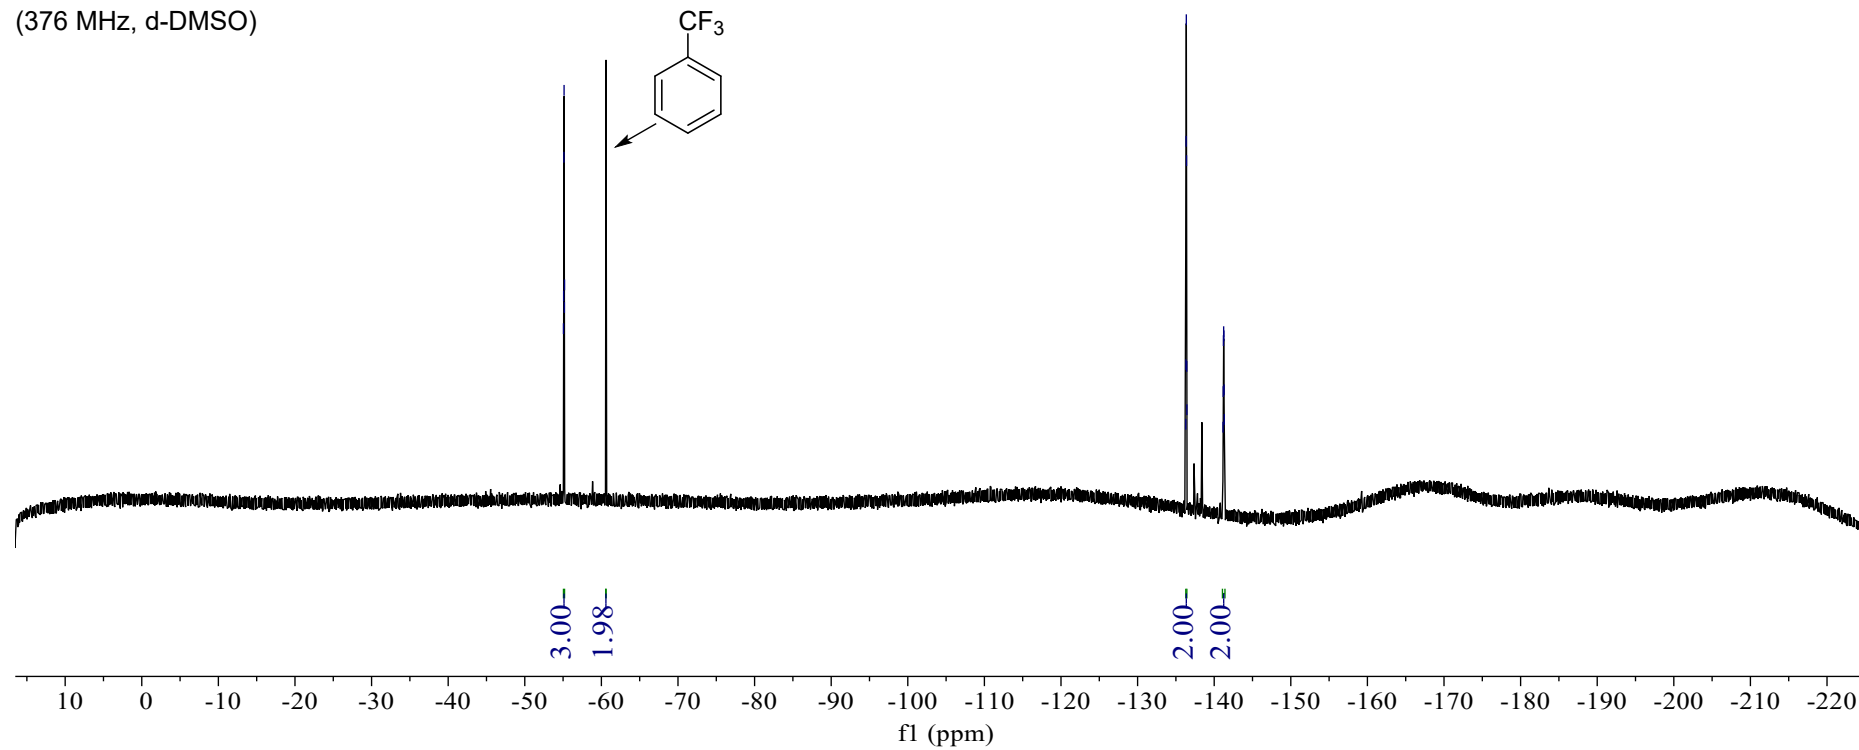

# Mass Spectrum SmartFormula Report

## Analysis Info

Analysis Name D:\LXMS\0306\_BC8\_01\_22072.d  
Method LC\_NO UV\_P50-1500\_10MIN.m  
Sample Name 0306

Acquisition D 2023-03-10 17:22:20

Operator Demo User

Instrument compact 8255754.2017  
6

## Comment

## Acquisition Paramet

|             |            |               |          |                |           |
|-------------|------------|---------------|----------|----------------|-----------|
| Source Type | ESI        | Ion Polarity  | Positive | Set Nebulizer  | 3.0 Bar   |
| Focus       | Not active | Set Capillary | 4000 V   | Set Dry Heater | 200 °C    |
| Scan Begin  | 50 m/z     | Set End Plate | -500 V   | Set Dry Gas    | 8.0 l/min |

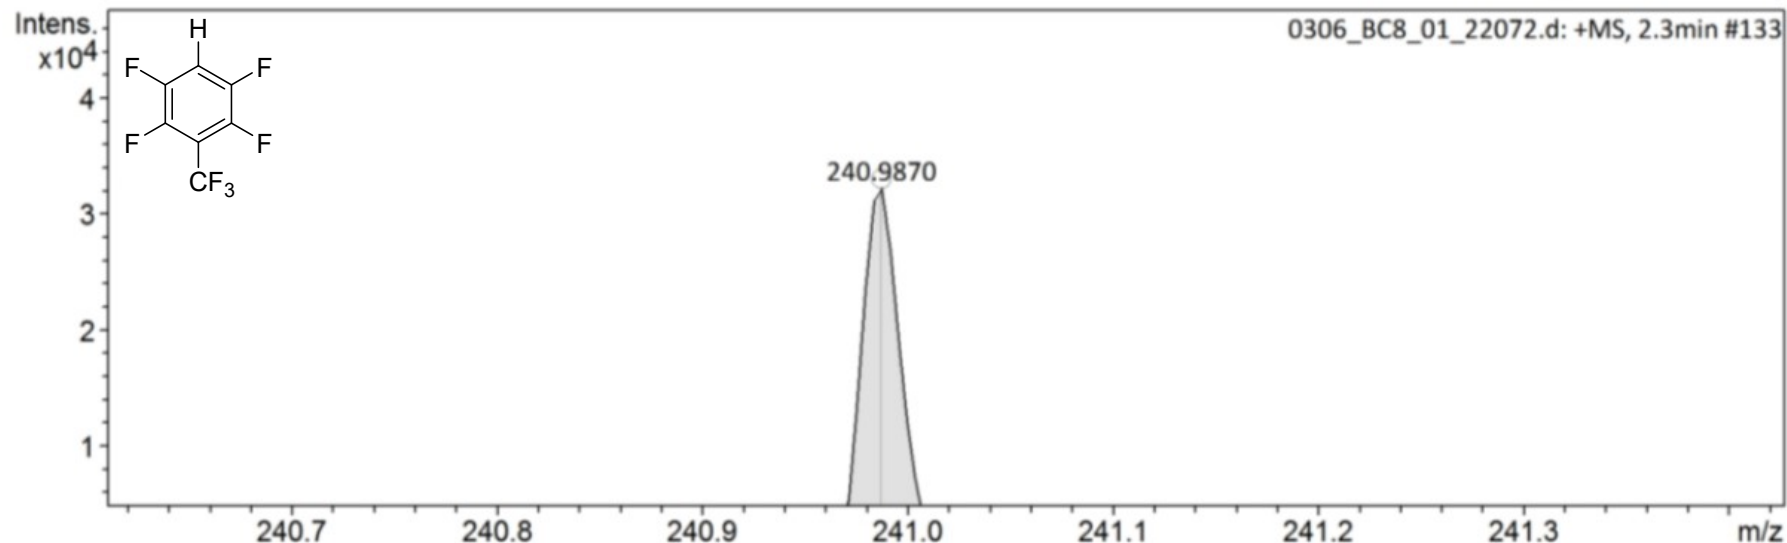

| Meas. m/z | # | Ion Formula | m/z      | err [ppm] | mSigma | # | mSigma | Score | rdb  | e;¥ | Conf | N-Rule |
|-----------|---|-------------|----------|-----------|--------|---|--------|-------|------|-----|------|--------|
| 240.9870  | 1 | C7HF7Na     | 240.9859 | -4.7      | 57.7   | 1 | 100.00 | 3.5   | even |     |      | ok     |

7.34  
7.33  
7.32  
7.31  
7.30  
7.30  
7.29  
7.28  
7.28  
7.26

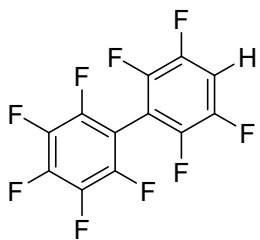

<sup>1</sup>H NMR  
(400 MHz, CDCl<sub>3</sub>)

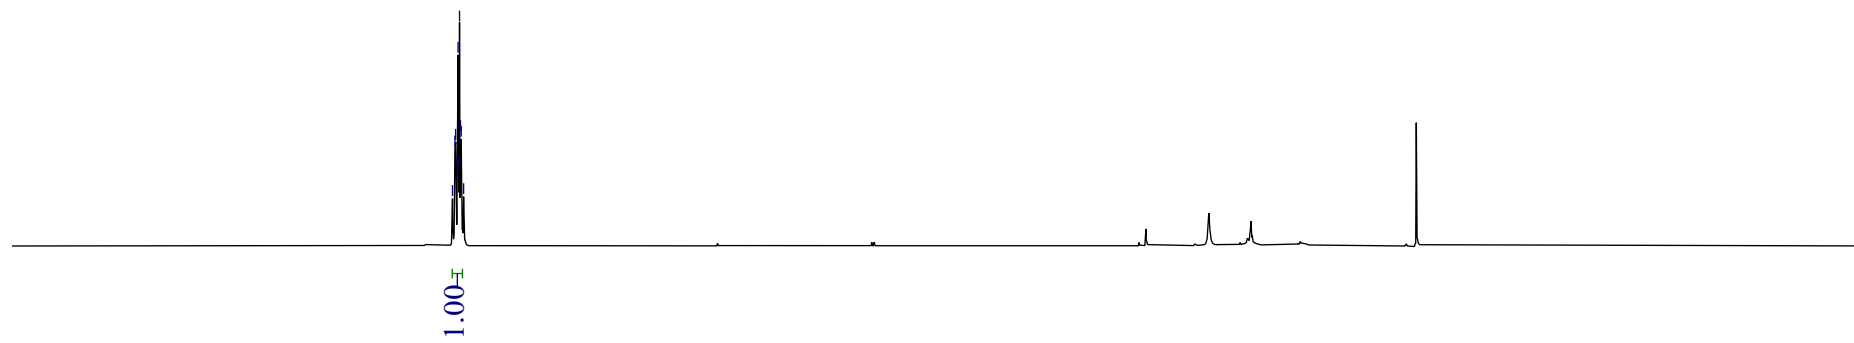

10.5 10.0 9.5 9.0 8.5 8.0 7.5 7.0 6.5 6.0 5.5 5.0 4.5 4.0 3.5 3.0 2.5 2.0 1.5 1.0 0.5 0.0 -0.5 -1.0 -1.5 -2.0 -2.5 -3.0

f1 (ppm)



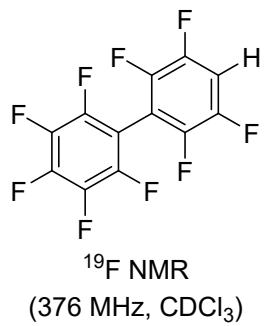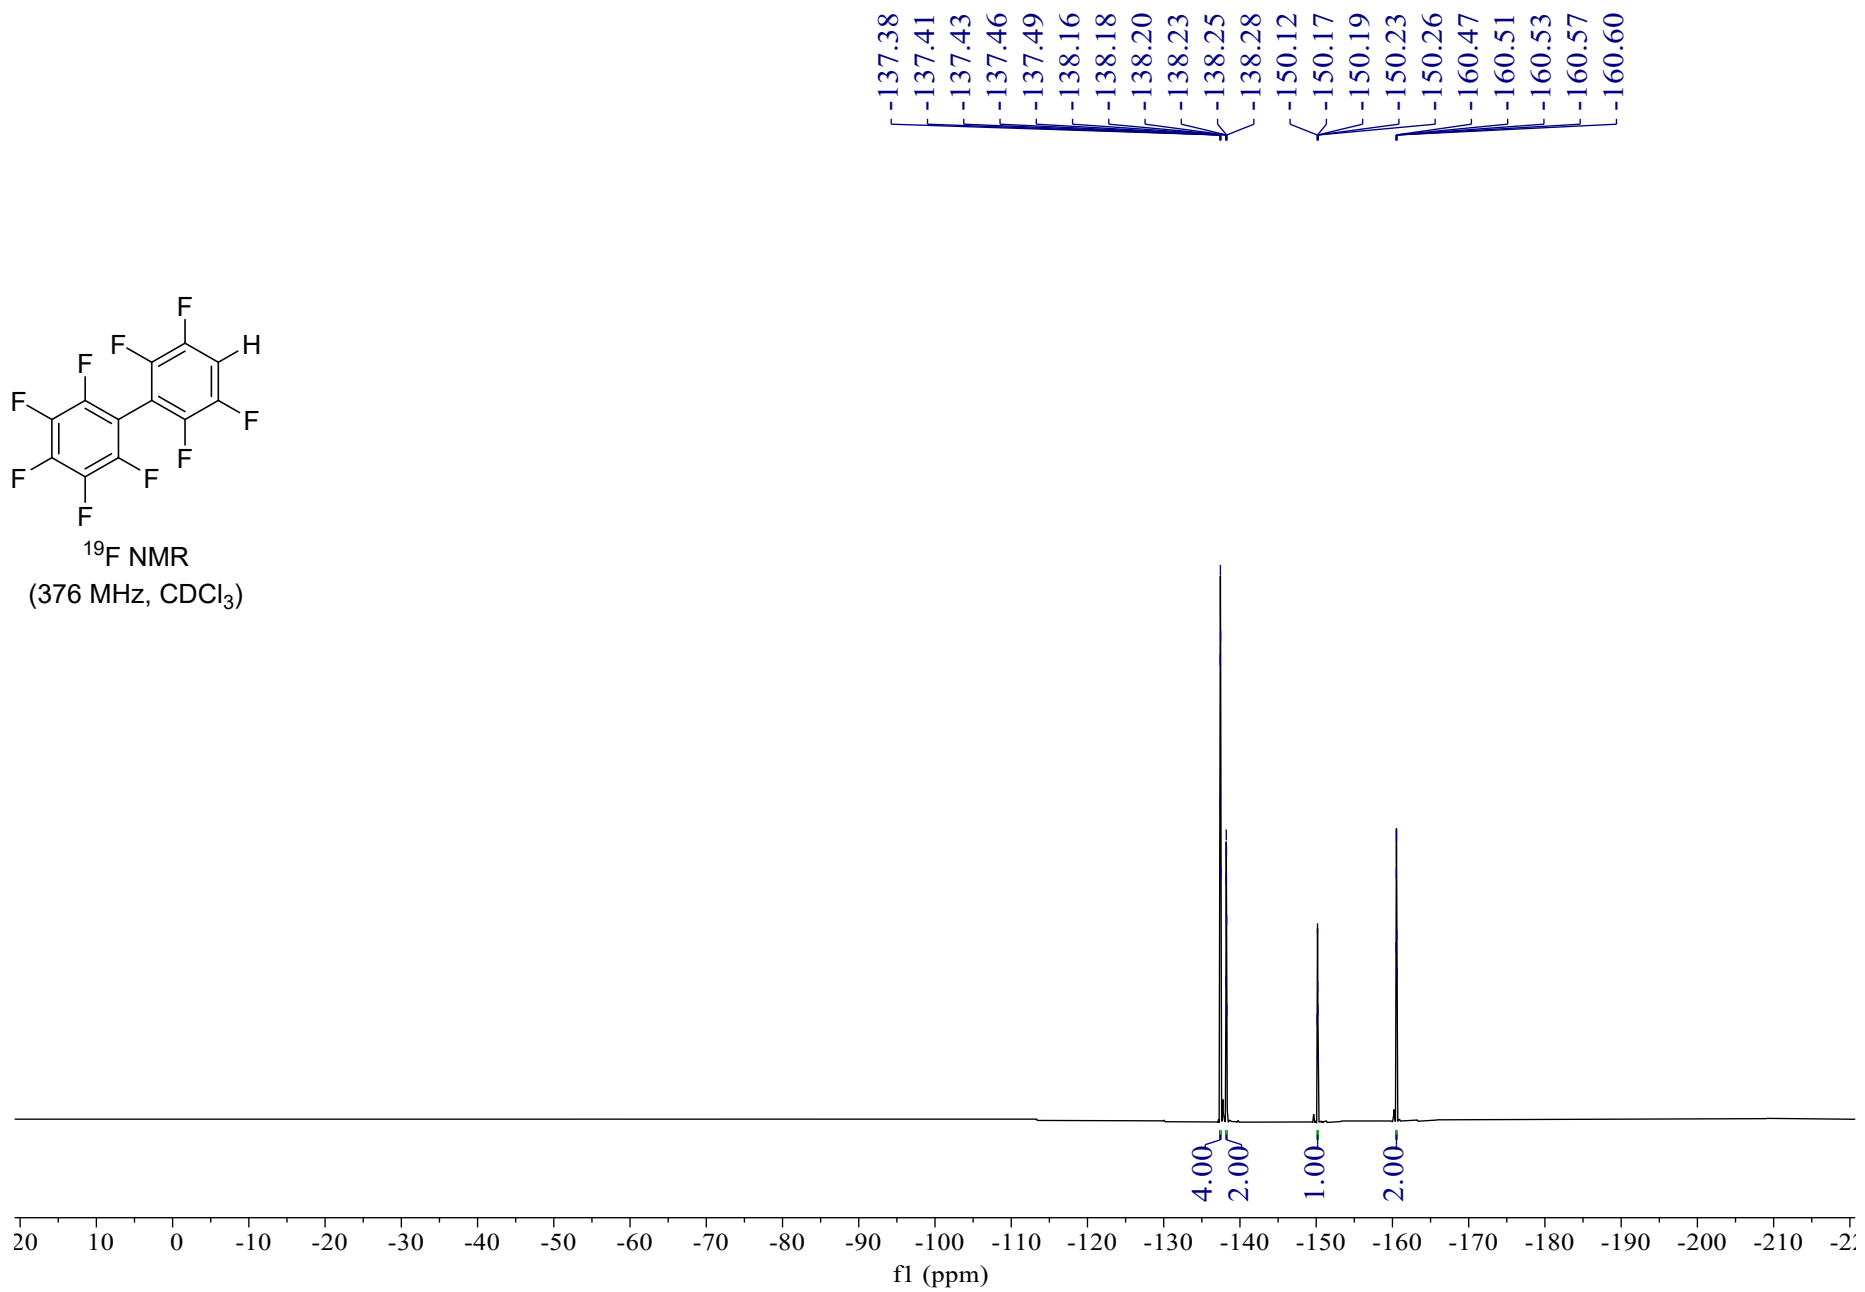

# Mass Spectrum SmartFormula Report

## Analysis Info

Analysis Name D:\LXMS\0406\_RB5\_01\_23027.d  
Method LC\_NO UV\_P50-1500\_6MIN.m  
Sample Name 0406

Acquisition D 2023-04-06 14:55:16

Operator Demo User  
Instrument compact 8255754.2017  
6

## Comment

## Acquisition Paramet

|             |            |               |          |                |           |
|-------------|------------|---------------|----------|----------------|-----------|
| Source Type | ESI        | Ion Polarity  | Positive | Set Nebulizer  | 3.0 Bar   |
| Focus       | Not active | Set Capillary | 4000 V   | Set Dry Heater | 200 °C    |
| Scan Begin  | 50 m/z     | Set End Plate | -500 V   | Set Dry Gas    | 8.0 l/min |

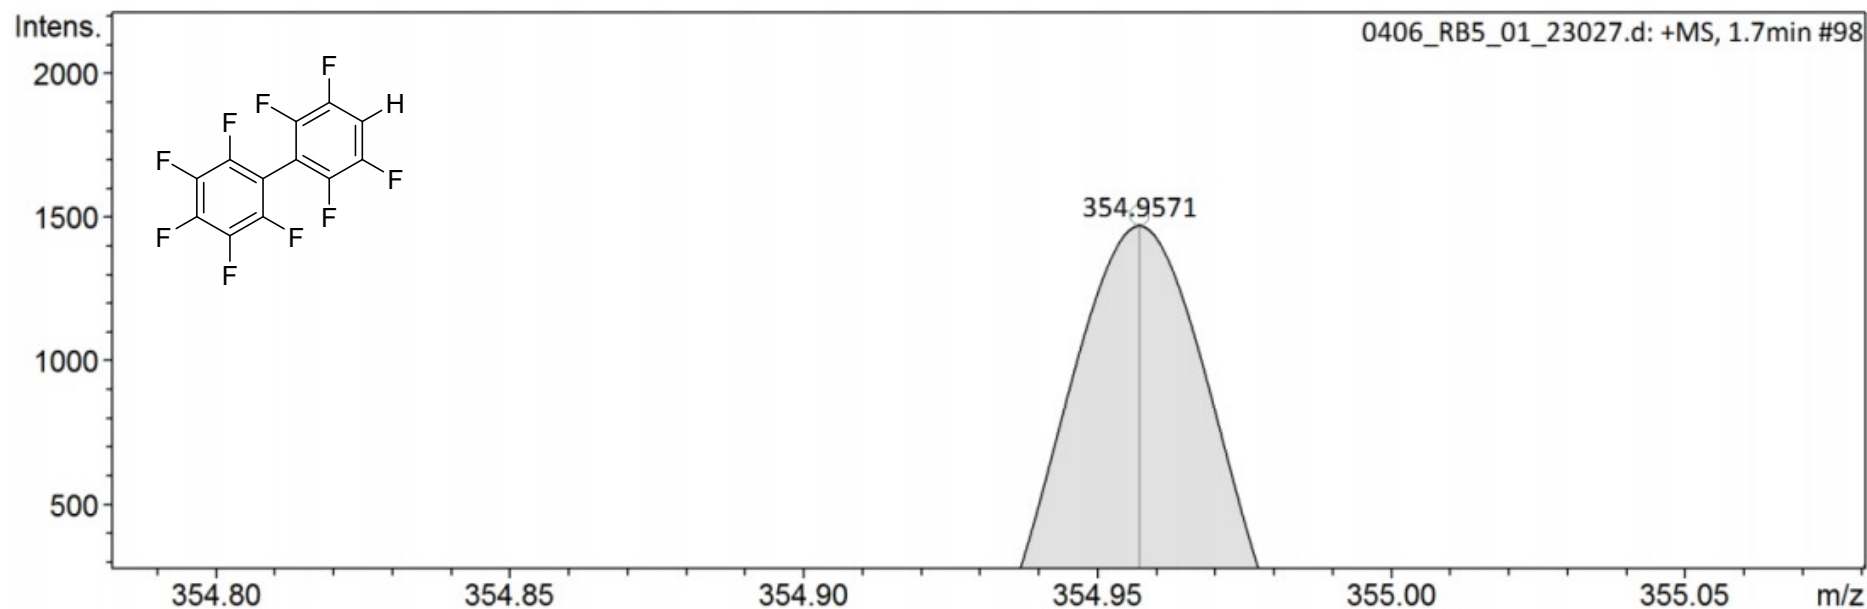

| Meas. m/z | # | Ion Formula | m/z      | err [ppm] | mSigma | # | mSigma | Score | rdb  | e;¥ | Conf | N-Rule |
|-----------|---|-------------|----------|-----------|--------|---|--------|-------|------|-----|------|--------|
| 354.9571  | 1 | C12HF9K     | 354.9566 | -1.3      | n.a.   | 1 | 100.00 | 7.5   | even |     |      | ok     |
